# Supplementary material for: Integrated proteomics and single-cell transcriptomics reveal potential therapeutic targets in Wilson’s disease patients
Source: Front Immunol. 2025 Oct 1;16:1635137. doi: 10.3389/fimmu.2025.1635137 (PMC12521215; doi:10.3389/fimmu.2025.1635137)
Supplement: Supplementary file 1 [file Table1.xlsx]

## Sheet: Table S1
Protein.accession	DZ_DMK64.x	DZ_GZS56.x	DZ_KL35.x	DZ_LM44.x	DZ_MSC54.x	DZ_SJ70.x	DZ_SK42.x	DZ_WJY50.x	DZ_YHM51.x	DZ_YYH58.x	GX_HDD11.x	GX_LC5.x	GX_PQ4.x	GX_TZJ8.x	GX_WHT2.x	GX_WHY3.x	GX_WYH7.x	GX_YCD1.x	GX_YGQ10.x	GX_ZC6.x	NX_FYZ4.x	NX_HJ10.x	NX_HLY8.x	NX_LCZ7.x	NX_LHL1.x	NX_WL9.x	NX_WSS5.x	NX_WSZ2.x	NX_WX3.x	NX_WYC6.x	FC	Pvalue	regulated	Protein.description	gene_name
A0A024QZ42	1.272	0.812	1.214	0.749	0.947	0.996	0.97	0.895	0.444	1.277	0.812	0.758	0	0.606	1.384	0	0.557	1.062	0	1.425	0	1.56	0	2.16	0	0.945	1.34	1.505	1.26	0	0.802736	0.283989	nosig	HCG1985580, isoform CRA_c OS=Homo sapiens OX=9606 GN=PDCD6 PE=1 SV=1	PDCD6
A0A024R6I7	0.894	1	0.778	0.787	0.904	1.104	0.626	0.862	0.801	1.123	0.94	1.474	1.303	1	1.056	1.741	0.836	1.743	0.991	1.854	1.499	1.273	1.121	1.362	0.702	1.415	0.96	0.979	1.139	0.721	1.35764	0.00144975	up	Alpha-1-antitrypsin OS=Homo sapiens OX=9606 GN=SERPINA1 PE=1 SV=1	SERPINA1
A0A075B6H9	0.885	1.113	0.504	0.924	1.23	0.889	0.572	0.781	0	0	0	0.722	0	0.408	0.297	0.983	0	2.338	1.115	1.96	2.227	2.042	0.64	0.781	0.953	1.314	0.617	1.16	0.877	0.524	1.37417	0.228608	nosig	Immunoglobulin lambda variable 4-69 OS=Homo sapiens OX=9606 GN=IGLV4-69 PE=1 SV=1	IGLV4-69
A0A075B6I0	0.303	2.296	0.876	2.142	0	1.247	0.57	0.929	3.223	1.303	1.065	1.398	0.61	0.239	0.35	0	0.352	0.923	1.714	1.355	0.894	2.501	0.573	0.766	0.95	0.823	0	1.136	1.028	1.277	0.696485	0.274777	nosig	Immunoglobulin lambda variable 8-61 OS=Homo sapiens OX=9606 GN=IGLV8-61 PE=3 SV=7	IGLV8-61
A0A075B6I4	0	0.467	0	1.727	0.558	0.352	0	0.436	0.447	0	0	0.59	0.573	0	2.092	0.973	0.766	0	0.668	1.913	0.557	0.363	0.402	0.722	3.578	3.607	0	0	0	0.436	2.16203	0.128505	nosig	Immunoglobulin lambda variable 10-54 OS=Homo sapiens OX=9606 GN=IGLV10-54 PE=3 SV=1	IGLV10-54
A0A075B6I9	0.999	1.198	0.878	1.946	1.506	0.962	1.385	1.023	1.45	0.958	1.128	2.165	0.738	0.881	0.631	0.962	0.647	1.808	1.039	1.088	1.605	1.121	1.963	1.216	0.858	1.108	0.554	0.825	0.772	1.23	0.90772	0.446467	nosig	Immunoglobulin lambda variable 7-46 OS=Homo sapiens OX=9606 GN=IGLV7-46 PE=3 SV=4	IGLV7-46
A0A075B6K5	0	1.184	0	0.488	0.329	0	1.242	0	0.333	0.949	0.923	0	0	0	0.162	0	0	2.729	0.848	2.176	0.627	1.394	1.941	0.596	1.489	0.322	0	0	0.576	0.204	1.54552	0.321233	nosig	Immunoglobulin lambda variable 3-9 OS=Homo sapiens OX=9606 GN=IGLV3-9 PE=3 SV=1	IGLV3-9
A0A075B6P5	0.367	0.44	0.37	4.339	1.675	0	1.128	0.433	1.702	3.424	0	1.464	0.45	0.372	0.356	1.524	0	3.765	0	0.839	0.236	0.391	0.781	1.044	0.707	0.434	0	0.367	0.332	0.81	0.499784	0.18676	nosig	Immunoglobulin kappa variable 2-28 OS=Homo sapiens OX=9606 GN=IGKV2-28 PE=3 SV=1	IGKV2-28
A0A075B6R9	0.756	0.705	0.493	1.584	0	0	0.711	0	0.866	0.696	0	0	0.453	0.581	0.537	0.545	0	4.636	0.744	1.283	1.798	0.752	0.994	1.018	0.67	1.668	0.658	0.647	0.542	1.019	1.59568	0.213375	nosig	Probable non-functional immunoglobulin kappa variable 2D-24 OS=Homo sapiens OX=9606 GN=IGKV2D-24 PE=1 SV=1	IGKV2D-24
A0A075B7B8	0.856	1.22	0.99	1.622	1.277	1.025	1.124	0.742	1.559	0.983	0.874	1.042	0.597	0.778	0.486	1.06	0.298	4.108	0.603	1.695	1.542	1.431	0.826	0.92	0.759	0.852	0.444	0.641	0.86	0.784	0.903667	0.590867	nosig	Immunoglobulin heavy variable 3/OR16-12 (non-functional) (Fragment) OS=Homo sapiens OX=9606 GN=IGHV3OR16-12 PE=1 SV=1	IGHV3OR16-12
A0A087WSY6	0.386	0.231	0.41	0.191	1.098	0	1.204	0.301	1.61	1.196	0.845	0.391	0.361	0.88	0.093	0.44	0	6.55	0.838	2.027	1.962	1.103	0.294	0.395	0.403	1.095	0.499	1.215	0.845	0.287	1.54844	0.323178	nosig	Immunoglobulin kappa variable 3D-15 OS=Homo sapiens OX=9606 GN=IGKV3D-15 PE=3 SV=6	IGKV3D-15
A0A087WTB5	1.462	0.948	0.869	1.058	0.815	0.861	0.924	0.996	0.983	0.993	1.028	0.941	1.32	1.041	1.296	1.007	1.575	1.168	1.12	1.616	1.122	1.285	1.069	0.951	1.163	0.89	0.857	1.402	1.606	1.489	1.2083	0.0150269	nosig	Interleukin-6 receptor subunit alpha OS=Homo sapiens OX=9606 GN=IL6R PE=1 SV=1	IL6R
A0A087WTD7	1.277	1.528	1.3	1.513	1.336	1.373	1.059	1.288	1.5	1.601	1.302	1.103	0.997	1.259	0.884	1.063	1.378	1.515	1.186	0.61	1.112	0.798	1.184	0.963	1.352	1.143	0.957	1.149	1.012	1.043	0.798911	0.000565188	nosig	A-kinase anchor protein 13 OS=Homo sapiens OX=9606 GN=AKAP13 PE=1 SV=1	AKAP13
A0A087WTM1	1.793	1.625	0.981	1.278	0.914	1.624	1.105	1.031	0.905	1.319	1.295	1.592	1.166	0.805	1.42	0.813	2.205	0.846	1.289	0.732	1.045	1.062	0.977	1.29	1.098	0.75	1.105	0.978	1.592	1.072	0.919761	0.44656	nosig	Roundabout homolog 1 OS=Homo sapiens OX=9606 GN=ROBO1 PE=1 SV=1	ROBO1
A0A087WTQ6	0.692	0.664	0.318	1.017	0.715	0.417	0.419	0.521	0.731	0.681	0.736	0.567	0.659	0.819	1.849	1.209	0.886	2.554	0.631	3.627	0.885	1.809	0.967	0.716	0.813	0.908	0.61	0.65	1.266	0.807	1.85976	0.00837457	up	Protein sidekick-1 OS=Homo sapiens OX=9606 GN=SDK1 PE=1 SV=1	SDK1
A0A087WTT1	0.105	0.776	0.527	0.441	0.617	0.298	0.561	0.089	0.683	0.237	0.521	0.29	0.19	0.167	12.791	0.174	0.399	0	0.244	1.509	0	0.013	0.319	0	0	0	0.835	0.569	0	0.161	2.0976	0.462916	nosig	Polyadenylate-binding protein OS=Homo sapiens OX=9606 GN=PABPC1 PE=1 SV=1	PABPC1
A0A087WUQ6	0	0.14	1.831	1.211	1.479	1.234	0.205	0.352	0	1.127	0.183	0.88	0.394	1.426	1.092	4.604	0.513	1.212	0.169	2.055	0.709	2.388	0.424	1.424	0	0.77	0.649	0.653	0.199	0	1.30255	0.484257	nosig	Glutathione peroxidase OS=Homo sapiens OX=9606 GN=GPX1 PE=1 SV=1	GPX1
A0A087WUR8	0.302	1.142	0.422	1.118	1.371	2.157	0.365	1.269	0.456	1.577	0.487	0.559	1.839	1.726	1.631	1.592	0.779	3.177	0.504	2.133	0.923	0.836	1.168	0.466	0.293	0.328	0.616	0.364	1.89	0.358	1.0644	0.805007	nosig	Inactive serine protease PAMR1 OS=Homo sapiens OX=9606 GN=PAMR1 PE=1 SV=1	PAMR1
A0A087WVC6	1.083	1.066	0.809	0.93	0.891	0.87	1.146	1.169	0.859	1.024	1.001	1.141	0.801	1.351	0.745	0.837	1.203	2.399	1.019	2.335	0.765	1.067	1.078	0.856	1.051	0.471	0.9	0.845	1.64	0.921	1.13872	0.255029	nosig	Protein-tyrosine-phosphatase OS=Homo sapiens OX=9606 GN=PTPRJ PE=1 SV=1	PTPRJ
A0A087WVQ6	1.226	1.43	1.15	1.32	1.423	1.481	1.214	1.099	1.055	1.011	1.567	1.39	1.317	1.001	0.983	1.056	1.544	0.87	1.133	0.516	1.013	0.912	1.363	1.266	1.638	0.992	1.082	1.079	1.512	1.597	0.96023	0.563835	nosig	Clathrin heavy chain OS=Homo sapiens OX=9606 GN=CLTC PE=1 SV=1	CLTC
A0A087WXI5	1.023	0.95	0.631	0.735	0.734	0.616	0.751	0.731	0.843	0.894	1.096	0.693	0.65	0.955	1.2	1.271	1.019	1.993	1.415	2.497	1.394	1.854	0.735	1.01	0.961	0.648	0.827	1.647	1.055	0.678	1.49203	0.00332638	up	Cadherin-1 OS=Homo sapiens OX=9606 GN=CDH1 PE=1 SV=1	CDH1
A0A087WXM8	1.265	1.17	1.114	1.315	1.132	1.194	0.993	1.25	1.48	1.32	0.949	0.898	1.296	0.629	1.865	1.189	0.679	2.54	0.644	0.883	0.802	2.262	0.971	0.938	0.737	1.077	0.784	0.783	0.814	0.543	0.869901	0.228541	nosig	Basal cell adhesion molecule OS=Homo sapiens OX=9606 GN=BCAM PE=1 SV=1	BCAM
A0A087WXT0	0	0	0.669	0.701	0.54	0.467	1.4	0.517	1.066	0	0.511	0.501	0.326	1.693	1.592	0.491	1.093	2.329	1.581	1.967	1.794	0.73	0.568	1.571	0.521	0.963	0.701	1.092	2.223	0.595	2.13078	0.00701165	up	Tenascin-N OS=Homo sapiens OX=9606 GN=TNN PE=1 SV=1	TNN
A0A087WYL5	0.029	1.068	1.721	1.457	1.297	1.811	1.366	1.405	1.462	1.657	1.357	1.224	1.656	1.391	0.653	1.817	1.454	0.543	1.287	0.447	0.766	0.777	1.587	1.214	1.532	1.194	1.209	1.291	1.045	1.104	0.887064	0.419768	nosig	Seizure 6-like protein 2 OS=Homo sapiens OX=9606 GN=SEZ6L2 PE=1 SV=1	SEZ6L2
A0A087WYT3	1.497	0	1.5	1.558	1.696	0	0	0.903	0	0	0.372	1.76	0	1.513	0.959	0	0.595	0	0	0.982	0	0	1.725	0	0	1.097	0	0.496	0.571	0	0.703802	0.46703	nosig	Prostaglandin E synthase 3 OS=Homo sapiens OX=9606 GN=PTGES3 PE=1 SV=1	PTGES3
A0A087WYX9	0.586	0.825	0.517	0.506	0.614	0.742	0.817	0.456	0.648	0.786	1.054	0.582	0.907	1.107	1.195	0.691	1.279	4.566	1.012	1.467	0.87	0.803	0.835	1.173	1.748	1.237	1.06	1.241	1.44	0.839	1.93212	0.00447933	up	Collagen alpha-2(V) chain OS=Homo sapiens OX=9606 GN=COL5A2 PE=1 SV=1	COL5A2
A0A087X0J2	1.386	1.033	1.175	1.044	0	1.208	1.077	0.838	0.947	1.195	1.292	0.888	0	1.095	1.432	1.099	0.999	0.375	1.498	1.57	1.19	1.081	0.984	0.931	1.158	1.087	1.701	1.199	0	1.125	1.04534	0.777464	nosig	UBX domain-containing protein 8 (Fragment) OS=Homo sapiens OX=9606 GN=UBXN8 PE=1 SV=1	UBXN8
A0A087X0K0	1.086	0.254	1.385	0.823	1.413	0.987	1.16	1.641	1.273	0.768	0.913	1.613	1.026	1.218	0.817	1.548	1.425	1.107	0.705	0.532	1.491	1.701	0.75	1.473	1.31	1.563	1.123	1.386	1.114	1.787	1.14004	0.324544	nosig	Collagen alpha-1(XV) chain OS=Homo sapiens OX=9606 GN=COL15A1 PE=1 SV=1	COL15A1
A0A087X0K1	0.661	1.178	0	1.822	0.359	0.696	0.641	0	0	0	0.251	0.816	0.892	2.608	0.59	0.64	0.393	0.582	0.687	2.398	1.758	1.065	1.037	1.692	0.293	0.574	2.748	1.709	0.506	0.936	2.06972	0.0367585	up	Calcium-binding protein 39 OS=Homo sapiens OX=9606 GN=CAB39 PE=1 SV=1	CAB39
A0A087X1F1	1.173	0	0.642	1.488	0.841	1.471	2.431	2.171	1.534	1.818	2.196	0.391	0.467	1.133	1.212	0.236	1.61	1.162	0	0.231	0.46	3.029	0.829	0.851	0.795	1.162	1.153	0.691	1.344	0.576	0.719581	0.190342	nosig	Mucosal addressin cell adhesion molecule 1 OS=Homo sapiens OX=9606 GN=MADCAM1 PE=1 SV=1	MADCAM1
A0A087X1T7	1.468	1.023	0.657	1.522	1.089	1.558	0.724	0.793	0.85	1.366	1.432	0.83	1.09	0.591	1.181	0.959	1.639	1.501	1.24	0.874	0.696	1.672	1.137	1.516	1.137	1.227	1.31	1.322	1.448	0.785	1.06729	0.576831	nosig	Aggrecan core protein OS=Homo sapiens OX=9606 GN=ACAN PE=1 SV=1	ACAN
A0A087X253	0	1.417	0.975	1.528	0.966	2.026	1.293	1.022	1.066	2.801	1.252	0.903	0.738	1.248	0.539	0	0.561	0	0.977	1.767	0	0	0	0	1.558	0.641	1.304	0.448	0	0.703	0.482626	0.0228331	down	AP complex subunit beta OS=Homo sapiens OX=9606 GN=AP2B1 PE=1 SV=1	AP2B1
A0A096LP62	0	1.379	0	1.643	0	0.337	1.563	1.561	0	0.886	0.389	1.056	0	0	1.009	1.018	0	2.519	1.517	1.035	0.486	2.251	1.009	0.38	0.27	0.797	0.692	0.958	0.307	1.363	1.15728	0.684716	nosig	Inter-alpha-trypsin inhibitor heavy chain H5 OS=Homo sapiens OX=9606 GN=ITIH5 PE=1 SV=1	ITIH5
A0A096LPE2	1.228	1.624	1.318	1.362	1.303	1.714	1.403	1.668	1.447	1.571	1.571	1.148	1.202	1.375	1.048	1.444	1.945	0.606	1.127	0.143	1.104	0.643	1.174	0.972	1.304	0.996	1.129	0.868	1.477	1.364	0.77333	0.00291343	nosig	SAA2-SAA4 readthrough OS=Homo sapiens OX=9606 GN=SAA2-SAA4 PE=3 SV=1	SAA2-SAA4
A0A0A0MRZ8	0	1.183	0	1.403	1.795	1.126	0	1.09	1.372	0.97	0	0.985	0	0.623	0	0.551	0	2.277	0.998	1.233	1.492	0.675	0.725	0.63	0	0.909	0.813	0.792	0	0	0.710538	0.311673	nosig	Immunoglobulin kappa variable 3D-11 OS=Homo sapiens OX=9606 GN=IGKV3D-11 PE=3 SV=6	IGKV3D-11
A0A0A0MS15	1.627	0.805	1.099	2.134	0.97	0.997	1.292	0.895	1.802	2.134	1.258	1.583	0.832	0.767	0.436	1.116	0.734	2.44	0.853	0.982	1.088	0.76	1.325	1.002	1.065	0.656	0.979	0.69	1.749	0.616	0.760851	0.104499	nosig	Immunoglobulin heavy variable 3-49 OS=Homo sapiens OX=9606 GN=IGHV3-49 PE=3 SV=1	IGHV3-49
A0A0A0MSA0	0.972	0.459	0.539	0.127	1.033	0.455	0.461	0	0.302	0.522	1.085	0.439	0.463	0	1.127	0	0.659	1.218	0.61	3.271	0	3.383	0	0	1.339	0.638	0	0.615	1.558	0.405	1.72587	0.156676	nosig	Laminin subunit alpha-3 OS=Homo sapiens OX=9606 GN=LAMA3 PE=1 SV=1	LAMA3
A0A0A0MSA4	1.314	1.289	1.608	0	1.193	3.151	1.52	1.758	1.433	1.426	0	0.807	1.457	1.203	0.456	1.332	1.608	0	1.019	0	0	0	1.253	0	1.234	0.773	0.78	1.09	1.002	0	0.476926	0.013747	down	Band 4.1-like protein 3 OS=Homo sapiens OX=9606 GN=EPB41L3 PE=1 SV=1	EPB41L3
A0A0A0MSA9	0.64	1.311	0.706	1.127	1.147	1.221	1.037	1.054	0.782	1.04	1.035	1.021	0.645	1.27	1.13	0.995	1.585	1.934	1.063	1.872	1.073	1.247	0.775	0.931	1.026	0.997	0.968	1.1	1.123	1.163	1.14024	0.173097	nosig	Poliovirus receptor OS=Homo sapiens OX=9606 GN=PVR PE=1 SV=1	PVR
A0A0A0MSN4	0.63	0.752	0.732	1.138	0.483	0.942	0.735	1.457	0.545	0.483	1.342	0.7	0.75	1.145	0.614	0.971	1.208	2.114	1.172	1.343	1.438	2.373	1.119	1.726	1.241	1.326	0.605	1.202	1.458	1.378	1.59713	0.00256816	up	Angiotensin-converting enzyme OS=Homo sapiens OX=9606 GN=ACE PE=1 SV=1	ACE
A0A0A0MSQ0	1.24	1.178	1.356	0.912	1.282	1.202	1.085	0.862	0.819	0.978	1	0.732	0.968	1.47	1.358	0.523	1.454	0.789	1.484	0.933	1.258	1.206	0.862	1.107	1.583	1.494	1.833	0.956	1.177	2.017	1.10885	0.261941	nosig	Plastin-3 OS=Homo sapiens OX=9606 GN=PLS3 PE=1 SV=1	PLS3
A0A0A0MSV6	1.243	1.153	1.267	1.316	1.441	1.295	1.229	1.377	1.282	1.253	1.223	1.2	1.355	0.813	0.79	1.158	0.949	1.579	1.424	0.727	1.401	1.221	1.298	1.018	1.226	0.893	1.093	1.017	0.991	1.119	0.874883	0.00883733	nosig	Complement C1q subcomponent subunit B (Fragment) OS=Homo sapiens OX=9606 GN=C1QB PE=1 SV=6	C1QB
A0A0A0MT89	1.658	1.285	1.536	0.943	1.816	1.003	1.222	1.073	1.275	0.375	1.361	2.186	0.906	0.383	0.269	1.098	0.433	2.552	0.763	1.39	1.642	2.098	0.412	0.919	0.725	0.799	0.835	0.738	0.626	1.13	0.872518	0.426636	nosig	Immunoglobulin kappa joining 1 OS=Homo sapiens OX=9606 GN=IGKJ1 PE=4 SV=2	IGKJ1
A0A0A0MTC1	0.942	0.6	0.721	0.654	1.333	1.136	0.781	0.736	2.819	1.26	1.5	0.835	1.076	1.108	1.006	1.066	0.885	1.288	0.766	0.472	3.338	0.658	0.956	1.692	0	1.083	1.481	1.093	2.007	1.112	1.06638	0.778976	nosig	E3 ubiquitin-protein ligase RNF213 OS=Homo sapiens OX=9606 GN=RNF213 PE=1 SV=1	RNF213
A0A0A0MTH3	2.527	1.862	1.608	1.578	0.064	0.913	0.775	0.206	0.104	0.124	3.07	1.285	1.963	0.174	0.854	0.065	2.239	0.085	2.157	0.748	2.196	0.243	0.044	2.069	1.992	2.005	2.343	1.639	0.106	1.292	1.36098	0.327533	nosig	Integrin-linked protein kinase OS=Homo sapiens OX=9606 GN=ILK PE=1 SV=1	ILK
A0A0B4J1R4	0.576	0.705	0.355	0.564	0.745	0.589	0.337	0.746	0.438	0.556	0.444	1.05	0.51	6.489	3.674	0.545	0.531	3.34	0.782	2.267	0.492	0.534	0.365	0.589	0.472	0.377	0.399	0.411	0.54	0.555	2.17127	0.0798189	nosig	4-hydroxyphenylpyruvate dioxygenase OS=Homo sapiens OX=9606 GN=HPD PE=1 SV=1	HPD
A0A0B4J1U7	0.501	0.611	1.62	1.708	3.031	0.728	0.379	0.619	1.3	1.132	0.486	0.899	0.885	0.419	0.471	1.391	0.242	6.03	0.61	1.077	1.612	0.385	0.723	0.807	0.29	1.333	0.416	0.219	0.464	1.601	0.875398	0.706135	nosig	Immunoglobulin heavy variable 6-1 OS=Homo sapiens OX=9606 GN=IGHV6-1 PE=3 SV=1	IGHV6-1
A0A0B4J1V0	1.122	0.904	0.679	1.273	1.249	0.413	0.624	2.083	0.963	0.505	0.659	0.422	0.479	0.845	0.551	0.843	0.377	4.027	0.512	0.853	2.741	0.732	1.188	0.422	0.897	4.617	0.822	0.808	1.038	0.455	1.18635	0.558955	nosig	Immunoglobulin heavy variable 3-15 OS=Homo sapiens OX=9606 GN=IGHV3-15 PE=3 SV=1	IGHV3-15
A0A0B4J1V1	1.625	1.051	1.146	0.946	1.352	1.266	0.65	1.048	1.096	0.85	1.049	1.206	0.659	0.724	0.668	1.21	0.456	1.21	0.806	1.507	2.432	1.203	1.08	0.746	0.848	3.627	0.695	0.818	1.34	0.814	1.04705	0.778739	nosig	Immunoglobulin heavy variable 3-21 OS=Homo sapiens OX=9606 GN=IGHV3-21 PE=1 SV=1	IGHV3-21
A0A0B4J1X8	1.215	0	0	0.753	3.199	0	0	0.909	2.47	0.84	0	0.971	0	0.367	0.626	0	0	0	0	1.638	1.144	0.283	0.717	0.768	0	0	0.546	0	1.257	0	0.443053	0.185039	nosig	Immunoglobulin heavy variable 3-43 OS=Homo sapiens OX=9606 GN=IGHV3-43 PE=3 SV=1	IGHV3-43
A0A0B4J231	1.188	1.203	1.019	1.335	1.262	1.19	0.998	0.922	1.49	1.319	0.959	1.067	0.607	0.697	0.538	1.004	0.595	2.163	1.015	1.6	1.458	1.659	0.928	0.88	0.892	1.668	0.763	0.838	1.252	0.898	0.900595	0.293485	nosig	Immunoglobulin lambda-like polypeptide 5 OS=Homo sapiens OX=9606 GN=IGLL5 PE=1 SV=1	IGLL5
A0A0C4DGZ8	1.14	1.096	1.345	1.507	0.938	1.159	0.833	1.342	1.734	1.006	1.041	1.083	0.59	1.739	0.933	0.78	1.092	0.808	2.008	1.356	1.133	1.676	0.858	1.233	0.846	0.717	0.954	1.003	1.578	0.956	0.924959	0.458918	nosig	Glycoprotein Ib (Platelet), alpha polypeptide OS=Homo sapiens OX=9606 GN=GP1BA PE=1 SV=1	GP1BA
A0A0C4DH24	1.117	1.443	1.216	0.936	1.221	1.264	1.884	1.863	0.978	1.135	1.164	0.982	1.022	0.904	0	0.935	1.199	1.854	0.618	0.558	2.555	0	0	0.83	1.219	0.712	1.379	1.521	0.627	0	0.692311	0.033582	down	Immunoglobulin kappa variable 6-21 OS=Homo sapiens OX=9606 GN=IGKV6-21 PE=3 SV=1	IGKV6-21
A0A0C4DH25	1.616	1.228	0	1.325	0	0	0.745	1.038	0	0.557	0	0.943	0	0.629	0.412	0.57	0.381	1.923	0.513	2.846	1.127	1.061	0	1.01	0	0.6	0.629	0.532	1.09	0.659	1.14649	0.708736	nosig	Immunoglobulin kappa variable 3D-20 OS=Homo sapiens OX=9606 GN=IGKV3D-20 PE=3 SV=1	IGKV3D-20
A0A0C4DH26	1.518	0	1.123	2.046	0	0	1.238	0	0	0.805	0	1.232	0.666	0.343	0	0.88	0.397	1.671	0	1.29	0	1.757	0	0	0.998	0.95	0	0.386	0.957	0.773	0.913819	0.837654	nosig	Probable non-functional immunoglobulin kappa variable 6D-41 OS=Homo sapiens OX=9606 GN=IGKV6D-41 PE=1 SV=1	IGKV6D-41
A0A0C4DH29	1.705	0.68	1.203	0.922	0	1.662	0.673	0.609	1.973	0.947	1.625	0	0.92	0.84	0.544	1.212	0.84	0.273	0.781	1.487	3.451	1.142	2.179	1.333	0.546	1.403	0.715	0.79	0.764	1.371	1.07075	0.774514	nosig	Immunoglobulin heavy variable 1-3 OS=Homo sapiens OX=9606 GN=IGHV1-3 PE=3 SV=1	IGHV1-3
A0A0C4DH32	0.539	0.378	0	0.698	1.024	0	0	0	1.545	0.673	1	1.553	0	0.411	0	0.525	0	1.039	0.347	0.639	3.099	1.26	0	1.195	0	0.301	0	0	3.998	0	1.58194	0.343502	nosig	Immunoglobulin heavy variable 3-20 OS=Homo sapiens OX=9606 GN=IGHV3-20 PE=3 SV=2	IGHV3-20
A0A0C4DH34	1.884	1.55	0.971	0.85	1.827	1.066	1.272	1.013	1.658	1.126	0.798	1.29	0.799	0.681	0.422	1.027	0.523	2.489	0.82	1.511	1.142	1.026	1.018	0.951	0.989	1.551	0.729	0.682	1.31	0.835	0.779035	0.0766171	nosig	Immunoglobulin heavy variable 4-28 OS=Homo sapiens OX=9606 GN=IGHV4-28 PE=3 SV=1	IGHV4-28
A0A0C4DH35	1.695	0.878	0.612	1.415	1.364	0.639	0.837	0.519	1.2	0.834	0.802	1.506	0.543	0.909	0.595	1.368	0	3.229	0.736	1.947	1.433	0.989	1.209	0.873	0.499	1.163	0.386	0.539	1.183	1.036	1.04798	0.809856	nosig	Probable non-functional immunoglobulin heavy variable 3-35 OS=Homo sapiens OX=9606 GN=IGHV3-35 PE=1 SV=1	IGHV3-35
A0A0C4DH42	1.147	1.805	1.051	0.64	1.21	0.68	1.889	1.21	0.984	0.807	1.722	1.182	0.784	0.534	0	0.419	0.576	4.478	0	0.656	1.641	1.276	0.406	0.492	0.732	0.693	0	1.508	0.229	0	0.75847	0.301974	nosig	Immunoglobulin heavy variable 3-66 OS=Homo sapiens OX=9606 GN=IGHV3-66 PE=3 SV=1	IGHV3-66
A0A0C4DH69	2.227	1.892	0.242	0.698	0.485	0	1.211	0.241	2.129	0.808	0.563	2.457	0.349	0.215	0.519	0.305	0	2.912	0.111	2.13	2.736	1.464	0.235	1.558	0.316	0.317	0.333	0.16	1.571	0	0.918705	0.815121	nosig	Immunoglobulin kappa variable 1-9 OS=Homo sapiens OX=9606 GN=IGKV1-9 PE=3 SV=1	IGKV1-9
A0A0D9SEN1	1.384	0.953	1.758	0.604	0.914	1.82	0.892	1.103	0.679	0.759	1.227	0.71	1.067	1.196	0.561	0.891	1.559	1.019	1.327	0.957	0.924	0.728	1.268	1.285	1.702	1.46	2.009	1.095	1.853	1.797	1.13358	0.385857	nosig	Prolyl endopeptidase FAP OS=Homo sapiens OX=9606 GN=FAP PE=1 SV=1	FAP
A0A0G2JIW1	1.315	1.104	0.944	1.392	0.765	1.607	0.897	1.245	1.142	1.331	1.192	0.83	1.269	0.867	1.94	1.252	0.979	0.892	1.492	1.288	0.475	0.698	1.141	1.053	0.749	1.362	1.999	1.253	0.845	1.203	0.96998	0.766593	nosig	Heat shock 70 kDa protein 1B OS=Homo sapiens OX=9606 GN=HSPA1B PE=1 SV=1	HSPA1B
A0A0G2JL54	1.591	1.292	1.312	0.826	1.062	2.277	1.287	1.087	1.799	1.298	1.239	1.023	2.132	1.003	0.665	1.67	1.176	0.195	1.462	0.596	0.744	0.663	1.92	0.81	0.852	1.198	1.91	1.2	1.257	1.475	0.838334	0.207721	nosig	C4a anaphylatoxin OS=Homo sapiens OX=9606 GN=C4B_2 PE=1 SV=1	C4B_2
A0A0G2JMB2	1.647	0.812	1.309	2.354	1.803	1.114	1.307	1.712	1.14	0.874	0.941	0.863	1.042	0.479	0.874	2.505	0.794	1.103	0.405	2.151	0.355	0.624	1.472	1.003	0.981	1.13	0.34	0.482	1.434	0.86	0.704875	0.045697	down	Immunoglobulin heavy constant alpha 2 (Fragment) OS=Homo sapiens OX=9606 GN=IGHA2 PE=1 SV=1	IGHA2
A0A0G2JMC9	0	0.748	1.333	0	1.34	0.889	0.13	0	0.675	0.229	1.547	0	1.292	0.272	0	0.352	0.806	2.163	2.553	2.34	0.546	0	0.527	0.252	1.201	1.624	1.29	0	1.539	0.617	1.7703	0.11185	nosig	Leukocyte immunoglobulin-like receptor subfamily A member 2 OS=Homo sapiens OX=9606 GN=LILRA2 PE=1 SV=1	LILRA2
A0A0G2JMM7	1.375	0	0.145	2.001	0	0	0	0.504	0	1.335	0.409	0.62	0.752	0.584	0.708	0.871	0.796	1.929	1.988	1.76	0.449	0.93	0	0.549	0	1.09	0.756	2.296	0.861	0	1.61828	0.252754	nosig	Osteoclast-associated immunoglobulin-like receptor OS=Homo sapiens OX=9606 GN=OSCAR PE=1 SV=1	OSCAR
A0A0G2JMX5	1.753	0.618	0.889	0.7	0.628	0.531	0.813	1.647	0.65	0.648	0.893	0.843	0.699	0.301	1.058	1.466	0.781	2.775	0.798	2.319	2.073	0.734	0.865	0.922	1.55	0.859	1.541	0.871	0.858	0.677	1.28889	0.205608	nosig	Leukocyte immunoglobulin-like receptor subfamily B member 5 OS=Homo sapiens OX=9606 GN=LILRB5 PE=1 SV=1	LILRB5
A0A0G2JNJ7	1.099	1.656	1.584	0.925	1.486	1.311	1.641	1.804	1.525	1.047	1.744	1.495	1.472	1.528	0.597	1.323	1.38	0.142	1.482	0.289	0.941	0.83	1.626	1.133	1.27	1.033	1.081	1.25	1.263	1.494	0.830125	0.0872764	nosig	CCR4-NOT transcription complex subunit 3 (Fragment) OS=Homo sapiens OX=9606 GN=CNOT3 PE=1 SV=1	CNOT3
A0A0G2JSC0	1.465	1.368	1.615	1.218	1.523	1.583	1.176	1.078	1.147	1.529	1.197	1.187	1.476	1.225	0.804	1.487	1.388	0.651	1.032	0.522	1.037	0.775	1.288	0.91	1.983	0.985	1.027	1.319	1.077	1.567	0.836995	0.032908	nosig	Immunoglobulin lambda variable 5-45 (Fragment) OS=Homo sapiens OX=9606 GN=IGLV5-45 PE=1 SV=1	IGLV5-45
A0A0J9YVY3	1.369	1.497	0.513	2.412	0.528	1.294	1.071	0.505	2.265	0.909	0.56	0.577	2.185	0.258	0.282	1.061	0	2.583	0.489	3.732	1.256	0.466	0.503	0.401	0.496	0.447	0.303	0.278	0.446	0.918	0.697282	0.225464	nosig	Immunoglobulin heavy variable 7-4-1 OS=Homo sapiens OX=9606 GN=IGHV7-4-1 PE=3 SV=1	IGHV7-4-1
A0A0J9YWN2	0.99	0	0	2.476	1.543	0	0	0.581	0	1.316	0.701	0.656	0.744	0	0	0.755	0	1.174	0	1.35	1.173	0.699	0	0	0	1.229	0	0	0.515	0	0.651318	0.43309	nosig	Immunoglobulin heavy joining 2 (Fragment) OS=Homo sapiens OX=9606 GN=IGHJ2 PE=4 SV=1	IGHJ2
A0A0J9YX35	1.973	1.299	1.13	1.697	1.509	1.803	1.231	1.098	1.374	1.576	1.213	1.007	1.034	1.03	1.153	0.954	0.835	2.077	1.071	0.964	1.15	0.57	0.787	0.757	1.284	0.876	0.771	1.003	0.827	0.868	0.688598	0.000846494	down	Immunoglobulin heavy variable 3-64D OS=Homo sapiens OX=9606 GN=IGHV3-64D PE=3 SV=1	IGHV3-64D
A0A0J9YX77	1.021	1.005	0	0	0.821	0.961	0.423	0	0	0.814	0.91	1.063	0.976	1.079	0.73	0	0.861	2.899	0.729	1.981	1.133	0.623	1.241	1.661	0.911	0.56	0.61	0.708	0.647	1.688	2.08226	0.0128267	up	Maltase-glucoamylase, intestinal (Fragment) OS=Homo sapiens OX=9606 GN=MGAM PE=1 SV=1	MGAM
A0A0J9YXF8	0.631	0	0	1.065	0.603	0	1.61	0	0	0.879	1.294	0.987	1.236	0	0	1.168	3.222	0	1.207	0	0.902	1.907	1.116	1.242	0	0	0	0	0.757	0	1.57038	0.310091	nosig	Proline-rich protein 4 OS=Homo sapiens OX=9606 GN=PRR4 PE=1 SV=1	PRR4
A0A0J9YXX1	2.123	0.282	1.602	1.646	1.368	0.731	0.686	1.324	0.413	0.513	0.048	0.577	0.893	0.412	0.488	0.32	0.315	7.214	0.472	0.9	2.44	2.136	0.484	0.38	0.297	0.872	0.223	0.293	0.469	0.635	0.929454	0.853741	nosig	Immunoglobulin heavy variable 5-10-1 OS=Homo sapiens OX=9606 GN=IGHV5-10-1 PE=3 SV=1	IGHV5-10-1
A0A0J9YY99	1.158	0.671	0.727	2.168	1.478	0.785	0.766	0.768	1.432	1.1	1.054	1.491	0.596	0.493	0.7	0.707	0.601	3.265	0.817	2.113	1.756	0.789	0.565	0.938	0.951	0.898	0.843	0.727	1.02	0.606	0.946802	0.783697	nosig	Ig-like domain-containing protein (Fragment) OS=Homo sapiens OX=9606 PE=1 SV=1	--
A0A140T8Y4	1.5	0.496	1.052	0.266	0.249	0.294	0.294	0.177	0.635	0.255	0.299	0.568	0.576	0.432	1.539	0.316	0.811	5.358	0.338	0.748	5.142	2.709	0.264	0.583	0.447	2.334	1.226	0.711	0.672	0.411	2.44193	0.0499315	up	HLA class I histocompatibility antigen, A alpha chain OS=Homo sapiens OX=9606 GN=HLA-A PE=1 SV=1	HLA-A
A0A140T8Z4	0.464	0.524	0.478	1.444	0.409	0.199	0.315	0.831	0.895	0.412	0	7.012	0	0.469	0.55	0	0	0.248	0.264	2.114	0	4.647	0.299	0.729	0	0	0.209	0.333	0.251	0.233	1.45353	0.525064	nosig	Lymphocyte antigen 6 complex locus protein G6d OS=Homo sapiens OX=9606 GN=LY6G6D PE=4 SV=1	LY6G6D
A0A140T9U0	1.062	1.421	1.645	0.592	0.622	0.456	0.179	0.777	0.495	1.514	0.216	1.576	0.626	0.182	1.377	0.445	2.09	2.398	0.986	0.627	3.186	1.835	0.904	2.058	0.839	1.622	1.465	1.321	0.877	0.365	1.42617	0.129918	nosig	HLA class I histocompatibility antigen, C alpha chain OS=Homo sapiens OX=9606 GN=HLA-C PE=1 SV=1	HLA-C
A0A140T9V1	0.653	0.417	0.9	3.633	0.414	0.509	0	1.13	0	1.472	0	1.19	0	0.97	0.407	0	0	0.599	1.072	1.921	0.417	1.701	0.686	1.607	0	0	0	0	0.882	0.483	0.653758	0.402902	nosig	Megakaryocyte and platelet inhibitory receptor G6b OS=Homo sapiens OX=9606 GN=MPIG6B PE=1 SV=1	MPIG6B
A0A182DWF2	1.237	1.679	1.745	1.693	1.219	1.252	1.693	1.728	2.012	1.361	1.124	1.153	1.351	0.928	0.64	1.286	0.963	0.406	1.184	0.108	1.375	0.668	1.207	0.82	1.422	1.082	1.092	1.288	1.51	2.373	0.70363	0.00198386	down	Thioredoxin-disulfide reductase OS=Homo sapiens OX=9606 GN=TXNRD2 PE=1 SV=1	TXNRD2
A0A1B0GUG1	0.629	0.801	2.364	0.939	0.484	2.211	0.759	0.762	0.881	0.529	1.283	0.603	1.914	1.436	0.712	0.567	1.079	0.615	3.735	2.066	0.55	1.428	1.642	0.112	0.944	1.087	0.481	0.941	1.106	1.415	1.14471	0.593368	nosig	Acid ceramidase OS=Homo sapiens OX=9606 GN=ASAH1 PE=1 SV=1	ASAH1
A0A1B0GV97	0.855	0.803	0.296	1.629	0.534	0.679	0.414	0.559	1.2	1.198	0.769	0.458	0.321	0.596	1.548	0.712	0.515	3.16	0.632	2.316	0.895	1.489	0.923	0.585	0.763	1.146	0.217	0.705	3.015	2.073	1.39819	0.1744	nosig	Coiled-coil domain-containing protein 33 (Fragment) OS=Homo sapiens OX=9606 GN=CCDC33 PE=1 SV=1	CCDC33
A0A1B0GVD5	0.328	0.556	0.472	0.683	0.367	0.458	0.613	0.514	0.603	0.437	0.559	1.88	1.143	0.902	3.886	3.012	1.911	1.455	1.141	2.63	1.437	1.067	0.666	0.465	0.258	0.739	0.555	0.563	0.612	0.846	2.55685	0.001669	up	Cathepsin D OS=Homo sapiens OX=9606 GN=CTSD PE=1 SV=1	CTSD
A0A1B0GVH5	0	0	0.541	0.68	0	0.634	0.627	0.596	0	0.508	0	0.613	0	1.3	0.419	0	0	2.926	0	0.938	0.683	2.014	0.931	1.05	0	0	0.661	1.205	1.597	0	1.99902	0.092606	nosig	Alpha-ketoglutarate-dependent dioxygenase FTO OS=Homo sapiens OX=9606 GN=FTO PE=1 SV=1	FTO
A0A1B0GVN9	0.105	1.569	0.26	0	0.207	0.299	1.117	0.33	1.423	1.795	0	0.239	1.984	0	6.772	0.747	0.244	0	0.267	1.272	0.165	0.213	1.519	0.192	1.26	1.211	1.686	1.601	0	0.463	1.39585	0.490035	nosig	Uroporphyrinogen decarboxylase OS=Homo sapiens OX=9606 GN=UROD PE=1 SV=1	UROD
A0A1B0GW23	1.177	1.048	1.511	1.663	1.28	1.009	1.284	0.952	1.069	1.294	1.413	0.719	1.061	1.107	0.932	0.972	1.188	1.378	0.905	0.722	0.907	1.7	1.194	0.931	1.381	1.191	1.058	1.383	1.614	1.107	0.930374	0.37209	nosig	N-acyl-L-amino-acid amidohydrolase (Fragment) OS=Homo sapiens OX=9606 GN=ABHD14A-ACY1 PE=3 SV=1	ABHD14A-ACY1
A0A1W2PRU0	1.154	1.324	1.406	1.399	1.001	1.143	1.118	1.329	0.992	1.289	1.34	1.155	1.346	1.468	0.049	1.364	1.409	0.091	1.096	1.428	1.06	1.532	1.111	1.004	1.036	1.339	1.113	1.854	1.565	0.876	0.955821	0.628641	nosig	Alpha-endosulfine OS=Homo sapiens OX=9606 GN=ENSA PE=1 SV=1	ENSA
A0A286YEY4	0.898	1.213	1.895	0.198	1.826	0.626	2.461	1.148	2.264	0.485	1.649	2.295	1.402	1.685	0.362	0.7	0.234	0	0.972	0.446	3.296	0.946	0.716	2.599	0.39	0.952	0.798	0.568	1.11	1.594	0.872676	0.599259	nosig	Immunoglobulin heavy constant gamma 2 (Fragment) OS=Homo sapiens OX=9606 GN=IGHG2 PE=1 SV=1	IGHG2
A0A286YEY5	0	1.816	1.988	0	3.691	2.119	2.332	0	0	0	0	0.728	0.932	1.806	0.805	0	0.307	0.021	0.305	0.917	0.167	0.626	0	1.081	0	2.954	0.355	0.862	0	0.054	0.498912	0.217553	nosig	Immunoglobulin heavy constant alpha 2 (Fragment) OS=Homo sapiens OX=9606 GN=IGHA2 PE=1 SV=1	IGHA2
A0A286YFJ8	1.522	1.219	1.238	1.397	1.714	0.966	1.617	0.946	2.452	1.279	1.291	1.097	0.716	0.703	0.448	0.714	0.177	2.473	0.986	1.694	1.258	1.025	0.502	1.231	0.85	0.749	0.549	0.622	1.162	1.011	0.67101	0.0151355	down	Immunoglobulin heavy constant gamma 4 (Fragment) OS=Homo sapiens OX=9606 GN=IGHG4 PE=1 SV=1	IGHG4
A0A2R8Y3T0	0.164	0.154	2.288	0.151	2.251	1.932	2.333	2.116	0.174	2.584	1.736	0.818	0.95	1.309	0.142	1.42	1.67	0.127	2.451	0.148	1.076	0.881	0.913	1.201	1.917	1.487	1.086	1.315	1.411	1.628	0.837139	0.545407	nosig	Cochlin OS=Homo sapiens OX=9606 GN=COCH PE=1 SV=1	COCH
A0A2R8Y5S7	0	0.686	0.294	0	0.663	0	0	0.407	0	0.537	0	1.003	0.561	1.875	2.98	0.504	1.323	1.85	0.686	0.797	0.624	0.754	1.301	0.888	2.152	0.868	0.848	1.358	0.992	1.961	4.50812	2.95E-05	up	Radixin OS=Homo sapiens OX=9606 GN=RDX PE=1 SV=1	RDX
A0A2R8Y7I4	1.103	1.167	1.24	1.74	0.943	1.082	1.001	1.19	1.039	1.298	0.437	1.281	0.796	0.887	1.027	0.752	1.152	1.148	1.297	0.772	0.859	3.177	0.708	2.01	0.696	0.913	1.293	1.022	1.194	1.106	0.954291	0.719529	nosig	Tripeptidyl-peptidase 1 OS=Homo sapiens OX=9606 GN=TPP1 PE=1 SV=1	TPP1
A0A2R8YG42	1.069	1.463	1.533	1.926	1.327	1.347	1.485	1.514	1.771	2.235	1.487	1.288	1.007	1.154	0.56	1.41	1.44	0.435	1.264	0.351	0.735	0.954	1.289	1.018	1.101	1.149	0.857	1.08	0.991	1.968	0.687237	0.00162377	down	Rho guanine nucleotide exchange factor 7 OS=Homo sapiens OX=9606 GN=ARHGEF7 PE=1 SV=1	ARHGEF7
A0A2U3TZL5	0.853	0.478	0.719	0.754	0.503	0.875	0.704	0.642	0.815	0.58	0.658	0.742	0.829	0.528	2.052	1.139	0.758	1.616	0.689	3.505	1.41	1.771	0.885	0.96	0.82	0.771	0.626	1.083	1.058	1.118	1.66243	0.00885084	up	CD59 glycoprotein (Fragment) OS=Homo sapiens OX=9606 GN=CD59 PE=1 SV=1	CD59
A0A3B3IRN5	2.096	0.968	1.14	1.202	1.095	2.718	1.261	1.113	1.54	1.544	1.02	0.724	1.606	0.882	0.766	1.487	0.905	0.655	1.837	0.644	0.787	0.831	1.472	0.677	0.919	1.067	2.088	1.016	1.029	1.387	0.742625	0.0749191	nosig	Fibromodulin OS=Homo sapiens OX=9606 GN=FMOD PE=1 SV=1	FMOD
A0A3B3IS66	0	1.555	1.322	0.486	0.613	0.553	0.768	0	1.791	0.667	2.266	0	0	0	0.353	0.419	0.793	1.746	2.602	0.839	0.853	1.986	1.265	1.013	0.872	0.604	1.754	0.693	0.643	1.972	1.33288	0.329372	nosig	Coagulation factor XIII B chain (Fragment) OS=Homo sapiens OX=9606 GN=F13B PE=1 SV=1	F13B
A0A3B3ISQ1	0	1.251	1.346	0.974	0	0.612	0	0	0.464	1.422	0.752	2.235	0.825	0.08	1.329	0.935	0.831	0.478	0	0.78	1.257	2.495	0.082	2.776	0.846	0	0.77	1.53	1.69	1.175	1.71906	0.107309	nosig	Disintegrin and metalloproteinase domain-containing protein 17 (Fragment) OS=Homo sapiens OX=9606 GN=ADAM17 PE=1 SV=1	ADAM17
A0A3B3ISS6	0.337	0.642	0.546	0.99	0.646	0.344	0.339	0.441	0.51	0.676	0.911	0.535	0.63	0.792	0.813	0.552	0.495	3.291	1.141	3.749	1.494	2.22	0.764	0.764	0.858	0.72	0.808	0.755	1.117	0.702	2.11214	0.00853735	up	Transmembrane glycoprotein NMB OS=Homo sapiens OX=9606 GN=GPNMB PE=1 SV=1	GPNMB
A0A3B3ISU0	0.822	0.311	0.655	0.379	0.855	0.826	1.515	0.903	0.818	2.678	0.74	1.081	0.902	0.772	0.926	1.198	0.74	1.66	3.033	1.327	1.496	1.922	0.894	1.033	0.82	0.961	1.004	1.076	1.44	0.92	1.22644	0.384745	nosig	Desmocollin-2 OS=Homo sapiens OX=9606 GN=DSC2 PE=1 SV=1	DSC2
A0A3B3ISX9	0.805	1.236	1.258	1.103	1.196	1.043	1.3	1.111	0.855	1.208	1.212	0.817	0.673	0.931	1.089	0.82	0.925	1.58	1.161	1.964	0.857	1.578	1.102	1.046	1.261	0.794	0.824	1.255	1.34	0.767	0.989474	0.898542	nosig	Tenascin-X OS=Homo sapiens OX=9606 GN=TNXB PE=1 SV=1	TNXB
A0A3B3ITK7	0.955	1.857	1.968	1.175	1.488	1.882	1.663	1.643	1.674	1.509	1.201	1.161	1.244	1.776	0.671	1.375	1.136	0.329	1.272	0.226	0.749	0.763	1.306	0.91	1.849	1.267	0.592	1.344	1.09	1.487	0.687619	0.00163182	down	Phosphoglucomutase-1 OS=Homo sapiens OX=9606 GN=PGM1 PE=1 SV=1	PGM1
A0A3B3ITL1	0.524	0.598	3.527	0.325	0	0.58	0.596	0.629	0.626	0	0	2.995	0	0.899	0.56	0.337	0	0.842	0	3.651	0	0.386	0.491	1.048	0	0.35	0.711	0.485	0.823	0.414	0.944767	0.91666	nosig	Ras-related protein Rab-2B OS=Homo sapiens OX=9606 GN=RAB2B PE=1 SV=1	RAB2B
A0A3B3ITY6	0.739	1.146	0.771	0.975	1.503	0.187	0.719	0.712	0.867	1.135	0.771	0.35	0.92	0	3.448	0.529	0	0.99	0	1.893	1.518	1.39	0.921	0	1.028	0	1.147	0.925	1.372	0.319	1.00074	0.997631	nosig	Calsyntenin-1 (Fragment) OS=Homo sapiens OX=9606 GN=CLSTN1 PE=1 SV=1	CLSTN1
A0A3B3IUC0	0.804	0.474	1.227	0.049	1.065	0.576	1.318	1.007	0.524	0.34	0.474	1.082	1.467	1.034	1.266	1.615	1.1	0	0.629	1.489	3.252	0.741	1.465	2.216	0.585	1.163	0.99	1.229	2.83	1.347	1.7588	0.0146176	up	Integral membrane protein 2 OS=Homo sapiens OX=9606 GN=ITM2B PE=1 SV=1	ITM2B
A0A494C0F5	1.194	0.694	0.723	1.384	1.21	0.853	1.196	0.989	1.103	0.99	1.561	0.777	0.717	1.116	3.355	0.921	1.52	0.336	0.776	1.711	0.998	0.778	1.522	0.838	1.646	1.168	1.126	1	0.494	0.999	1.12998	0.408418	nosig	V-set and immunoglobulin domain-containing protein 4 OS=Homo sapiens OX=9606 GN=VSIG4 PE=1 SV=1	VSIG4
A0A494C0L6	0.865	0.593	0.374	0.516	0.859	1.363	0.604	0.817	0.621	0.908	1.044	1.668	2.3	1.11	0.837	2.07	1.372	1.289	0.772	2.142	0.939	1.253	1.042	1.214	0.902	1.304	0.866	1.386	0.981	1.021	1.69628	0.000519924	up	Thymidine phosphorylase (Fragment) OS=Homo sapiens OX=9606 GN=TYMP PE=1 SV=1	TYMP
A0A494C0U4	1.747	1.081	0.879	1.321	1.08	2.039	1.248	1.031	1.428	1.631	1.192	1.181	1.293	0.977	0.541	1.45	0.982	1.093	2.109	0.828	0.681	0.8	1.209	0.942	1.168	1.109	1.288	1.268	0.972	1.309	0.830256	0.112647	nosig	Protein-tyrosine-phosphatase OS=Homo sapiens OX=9606 GN=PTPRZ1 PE=1 SV=1	PTPRZ1
A0A494C0X0	0.967	1.325	1.345	1.938	1.401	0.887	1.599	0.969	2.296	1.69	1.183	0.916	0.871	1.421	1.121	1.278	1.72	1.543	0.89	0.302	0.892	0.776	1.582	1.016	0.956	1.3	1.363	0.91	0.878	0.834	0.754387	0.0458289	down	Tubulin-folding cofactor B OS=Homo sapiens OX=9606 GN=TBCB PE=1 SV=1	TBCB
A0A494C0X7	3.862	1.345	1.397	1.331	1.385	1.068	1.221	1.34	1.441	1.342	2.8	0.498	1.414	0.44	0.852	2.104	0.45	0.928	0.532	0.802	3.074	0.522	0.949	0.47	0.365	0.433	2.472	0.364	0.567	0.351	0.647947	0.101729	nosig	Integrin beta OS=Homo sapiens OX=9606 GN=ITGB2 PE=1 SV=1	ITGB2
A0A494C165	1.301	1.373	0.949	1.349	1.077	0.759	0.923	1.069	1.246	1.072	1.424	1.018	0.971	1.42	1.263	1.04	1.312	1.14	0.897	1.16	1.17	1.462	0.895	1.067	1.517	1.265	0.845	1.212	1.353	0.963	1.05208	0.471464	nosig	Xaa-Pro dipeptidase (Fragment) OS=Homo sapiens OX=9606 GN=PEPD PE=1 SV=1	PEPD
A0A4V7I447	1.363	1.228	1.003	1.327	1.488	0.875	1.401	0.834	1.377	1.308	1.504	1.098	1.17	1.306	1.431	1.013	1.849	1.27	1.531	1.162	0.865	0.43	1.052	0.627	0.945	1.364	0.777	1.002	1.583	0.828	0.934407	0.461886	nosig	Apolipoprotein B receptor OS=Homo sapiens OX=9606 GN=APOBR PE=1 SV=1	APOBR
A0A4W8ZXM2	1.428	0.992	1.065	1.194	1.482	0.93	0.741	1.016	1.497	0.754	1.148	0.558	0.615	0.569	0.484	0.925	0.224	3.921	0.546	1.592	2.561	0.96	0.696	0.611	0.641	1.629	0.625	0.986	0.839	1.141	0.958239	0.827536	nosig	Immunoglobulin heavy variable 3-72 OS=Homo sapiens OX=9606 GN=IGHV3-72 PE=1 SV=1	IGHV3-72
A0A4W9A917	0.529	2.197	1.082	0.979	0.771	2.689	0	1.093	0.391	1.354	0.54	1.742	0	0	0.518	0.027	0.172	2.441	0.964	0.221	4.281	0.62	0	0	0.571	1.709	1.454	0.634	0	0.985	0.761344	0.459033	nosig	Immunoglobulin heavy constant gamma 3 (Fragment) OS=Homo sapiens OX=9606 GN=IGHG3 PE=1 SV=1	IGHG3
A0A5F9ZHM4	0.868	0.691	0.993	0.924	0.981	0.892	0.821	1.009	0.87	0.753	0.94	0.822	1.028	1.013	3.497	1.1	0.767	1.187	0.745	1.21	1.77	1.543	0.952	1.134	1.153	0.834	1.359	1.175	1.036	1.046	1.38099	0.0227211	up	L-lactate dehydrogenase OS=Homo sapiens OX=9606 GN=LDHB PE=1 SV=1	LDHB
A0A5H1ZRS9	1.288	0.697	0.955	2.234	1.544	0.755	1.016	0.756	1.488	1.304	1.295	0.917	0.683	0.816	0.58	1.089	0.602	3.684	0.593	1.293	1.679	1.091	0.759	1.488	0.771	0.805	0.573	0.796	0.695	0.672	0.867367	0.468103	nosig	Immunoglobulin kappa variable 2D-29 OS=Homo sapiens OX=9606 GN=IGKV2D-29 PE=1 SV=1	IGKV2D-29
A0A5K1VW95	0.096	0	0.132	1.598	0.07	2.267	0	0.122	0.082	0.71	0.627	0.151	1.232	1.754	6.232	1.347	1.071	0.328	0.581	2.095	0.814	1.439	0.124	1.448	1.009	0.207	2.373	0.293	0.056	0.143	2.29703	0.109067	nosig	Malate dehydrogenase OS=Homo sapiens OX=9606 GN=MDH1 PE=1 SV=1	MDH1
A0A6Q8PFE5	0.006	0.149	0	0.01	0	0.003	0.29	0	0	0.706	0.003	1.125	0.943	0	9.519	1.285	0.495	0.595	0.066	1.512	0.095	0.053	0	1.169	0.003	1.001	1.352	0.01	0	1.407	8.86297	0.06611	nosig	Calpastatin OS=Homo sapiens OX=9606 GN=CAST PE=4 SV=1	CAST
A0A6Q8PFJ0	1.603	1.263	1.27	1.022	1.581	1.709	1.607	1.839	1.957	1.404	1.588	1.032	1.168	1.215	1.732	0.82	0.941	0.987	1.156	0.586	1.1	0.75	1.197	0.055	1.237	1.11	1.215	1.052	0.922	0.974	0.682956	0.000538038	down	Prelamin-A/C OS=Homo sapiens OX=9606 GN=LMNA PE=4 SV=1	LMNA
A0A6Q8PHH9	1.658	3.481	1.611	1.404	1.141	1.892	1.702	1.557	1.375	1.747	1.666	0	1.497	1.698	1.097	0	0	0	0.978	0.136	0	0	0.608	0	1.068	0.783	0.588	0.607	0.795	0.573	0.344205	0.000189028	down	Glycine--tRNA ligase OS=Homo sapiens OX=9606 GN=GARS1 PE=4 SV=1	GARS1
A0A6Q8PHP3	0	0.581	1.451	0.644	0.594	0.717	0.792	0.789	0.712	0.664	0.784	1.096	1.379	1.313	5.245	0	0.617	0.202	0.727	1.339	0	0.515	0.57	0.302	0	0.627	3.726	1.129	0.696	0.844	1.52009	0.24885	nosig	Alanine--tRNA ligase, cytoplasmic OS=Homo sapiens OX=9606 GN=AARS1 PE=4 SV=1	AARS1
A1A5B4	1.353	1.077	0.759	0.429	0.824	1.123	1.085	0.709	0.773	0.551	0.784	0.92	0.345	1.382	0.874	0.804	1.442	3.532	0.821	2.212	1.206	0.692	1.151	0.346	1.107	1.015	1.238	0.593	1.399	1.154	1.32541	0.129752	nosig	Anoctamin-9 OS=Homo sapiens OX=9606 GN=ANO9 PE=1 SV=3	ANO9
A1L4H1	1.119	1.005	0.748	1.008	0.571	0.857	0.762	1.097	1.028	0.532	0.584	0.967	0.558	0.821	1.619	1.109	0.808	2.235	0.843	3.378	0.272	1.04	1.033	0.738	0.69	1.048	0.798	1.046	1.306	0.698	1.23702	0.226005	nosig	Soluble scavenger receptor cysteine-rich domain-containing protein SSC5D OS=Homo sapiens OX=9606 GN=SSC5D PE=1 SV=3	SSC5D
A2A274	1.934	1.921	1.577	0.757	2.004	1.185	1.59	1.483	1.541	0.658	0.402	1.142	1.537	1.088	0.814	1.394	1.728	0.701	1.366	0.877	1.068	0.517	1.689	1.142	1.325	0.751	1.664	0.525	0.679	1.265	0.739727	0.0442488	down	Aconitate hydratase, mitochondrial OS=Homo sapiens OX=9606 GN=ACO2 PE=1 SV=1	ACO2
A2A2V1	1.048	0.383	0.714	0.417	0.622	0.548	0.911	1.054	0.754	0.823	0.627	0.931	0.768	1.033	2.239	0.863	1.016	1.814	0.677	2.315	1.651	2.226	1.109	1.362	0.416	0.908	0.704	0.968	1.462	0.866	1.64662	0.00372217	up	Major prion protein (Fragment) OS=Homo sapiens OX=9606 GN=PRNP PE=1 SV=1	PRNP
A2ACR1	1.367	1.008	0.951	1.245	1.297	1.572	0.895	1.213	0.953	1.052	1.443	1.184	1.419	1.368	1.277	1.023	1.012	0.908	1.105	0.947	1.566	0.783	1.354	1.214	1.105	1.145	1.068	1.235	1.199	1.386	1.02748	0.705249	nosig	Proteasome subunit beta OS=Homo sapiens OX=9606 GN=PSMB9 PE=1 SV=1	PSMB9
A2NJV5	1.847	0	1.082	1.12	0.619	0	1.316	0.332	0.724	0.971	1.022	1.024	0	1.169	0.478	0.761	0.36	0.597	1.302	1.762	1.261	1.218	0	0	0.354	1.341	0	0.993	4.543	0.276	1.15223	0.679254	nosig	Immunoglobulin kappa variable 2-29 OS=Homo sapiens OX=9606 GN=IGKV2-29 PE=3 SV=2	IGKV2-29
A6NI72	0.563	0.846	0	1.598	0	1.029	0.945	1.198	0	0.645	0	0	0	0	0	0	1.663	0.338	0	1.691	0.719	0.411	0.725	1.052	0	1.39	1.998	1.394	0.507	2.351	1.0433	0.9056	nosig	Putative neutrophil cytosol factor 1B OS=Homo sapiens OX=9606 GN=NCF1B PE=5 SV=2	NCF1B
A6NKB8	0.838	1.899	0.673	1.44	0.782	3.657	1.084	0.674	2.63	2.219	3.493	0.617	0.489	1.115	0.944	0.706	1.175	0.58	2.383	0.537	0.658	0.486	0.616	0.692	3.385	0.689	0.747	0.847	0.54	0.618	0.670515	0.182692	nosig	Aminopeptidase B OS=Homo sapiens OX=9606 GN=RNPEP PE=1 SV=1	RNPEP
A6QRJ1	0	0	0	0.437	0	0	0.836	0.562	1.482	0.468	0.848	0.81	0.566	0.68	4.729	0.935	0.857	0.071	0.798	1.853	0.876	0	0.728	1.166	0.582	0	0.652	1.058	0.99	2.06	2.67622	0.0285334	up	V-type proton ATPase subunit S1 (Fragment) OS=Homo sapiens OX=9606 GN=ATP6AP1 PE=1 SV=1	ATP6AP1
A6XMV8	1.669	1.183	1.162	0.863	1.284	1.057	1.182	1.078	1.2	0.987	1.364	1.057	1.145	1.41	1.469	1.034	1.138	1.433	1.427	0.724	1.497	0.694	1.009	1.046	1.244	1.14	1.84	0.943	0.879	1.027	1.00814	0.919403	nosig	Protease serine 2 preproprotein OS=Homo sapiens OX=9606 GN=PRSS2 PE=1 SV=1	PRSS2
A8K7I4	0.763	0.568	0.37	0.807	0.458	0.334	0.728	0.362	1.059	0.85	0.616	0.763	0.322	0.603	0.47	1.16	0.861	1.195	4.071	5.955	0.31	1.916	0.331	0.192	0.324	0.283	0.216	0.494	0.242	0.735	1.67161	0.218825	nosig	Calcium-activated chloride channel regulator 1 OS=Homo sapiens OX=9606 GN=CLCA1 PE=1 SV=3	CLCA1
A8MU27	0.009	0.269	1.055	0.655	0.006	0.838	0.657	1.723	0.004	0.637	0	2.238	0.005	0.202	2.037	1.025	0.188	1.562	0.123	5.865	0.008	0.062	0.226	2.946	0.004	0.01	1.176	0.385	0.39	0	1.57629	0.369654	nosig	Small ubiquitin-related modifier 3 OS=Homo sapiens OX=9606 GN=SUMO3 PE=1 SV=1	SUMO3
B0QZZ4	1.214	1.471	1.471	1.001	0.912	1.669	1.661	1.537	2.117	1.769	1.693	2.157	1.515	1.06	0.648	0.697	0.879	0.102	1.28	0.248	0.842	1.479	1.604	1.238	1.214	2.011	0.297	0.895	1.271	1.396	0.759884	0.0457757	down	Histone lysine demethylase PHF8 (Fragment) OS=Homo sapiens OX=9606 GN=PHF8 PE=1 SV=1	PHF8
B1AH49	1.694	1.102	1.314	1.332	1.171	1.414	0.891	1.195	0.979	1.025	1.159	1.438	1.052	1.193	1.754	1.69	0.836	0.155	0.925	1.554	0.83	1.414	1.052	1.319	0.88	0.598	1.115	1.054	0.906	1.448	0.923166	0.42006	nosig	3-mercaptopyruvate sulfurtransferase OS=Homo sapiens OX=9606 GN=MPST PE=1 SV=1	MPST
B1AHC9	2.911	0.995	0	0.687	0.922	0.668	0.954	0.83	1.06	0.842	1.104	0.506	1.01	0	1.8	0.87	0	0	1.472	0.457	0.388	1.734	0.567	0	0.853	0.512	4.955	0.305	2.202	0.821	0.990779	0.979147	nosig	ATP-dependent DNA helicase 2 subunit 1 OS=Homo sapiens OX=9606 GN=XRCC6 PE=1 SV=1	XRCC6
B1AHL2	0.795	0.783	0.586	1.247	1.141	0.749	0.842	0.949	0.704	1.078	1.14	0.852	1.113	0.91	0.971	0.861	1.048	1.098	1.34	1.351	0.871	2.358	1.329	1.382	1.55	1.223	1.224	1.517	1.433	1.333	1.4032	0.0015296	up	Fibulin-1 OS=Homo sapiens OX=9606 GN=FBLN1 PE=1 SV=1	FBLN1
B1AK88	0	0	0.43	0.283	0	0.886	0	0.292	0.296	0.277	0	0.273	0	0.913	0	0.347	0	1.889	0	3.535	0.189	0.317	0	0.497	0	0.361	4.943	0.344	0.174	0.405	2.87886	0.142415	nosig	F-actin-capping protein subunit beta OS=Homo sapiens OX=9606 GN=CAPZB PE=1 SV=1	CAPZB
B1ALD9	0.666	0.888	0.336	1.257	1.422	1.427	1.273	0.504	0.692	1.29	0.828	0.338	0.379	2.482	1.466	0.947	1.873	2.099	1.585	1.089	0.839	0.834	0.432	1.718	1.25	1.299	1.475	1.069	1.641	0.42	1.23337	0.230772	nosig	Periostin OS=Homo sapiens OX=9606 GN=POSTN PE=1 SV=1	POSTN
B1B0D4	0.552	0.613	0.369	0.655	0.635	0.476	0.737	0.54	0.495	0.692	0.669	1.604	0.886	1.081	2.849	1.084	1.765	2.786	1.065	2.835	0.801	0.611	0.766	0.904	0.757	0.699	0.69	0.742	1.183	0.662	2.11997	0.00121283	up	ADAMTS-like protein 2 OS=Homo sapiens OX=9606 GN=ADAMTSL2 PE=1 SV=1	ADAMTSL2
B2CW77	0.639	0.918	0.634	1.757	0.946	1.576	1.199	0.713	0.864	0	1.83	0.759	0.855	1.198	1.137	0.894	1.108	1.874	1.222	0.808	2.147	0.828	1.459	1.655	1.538	0.793	1.011	0.5	0.919	1.679	1.30943	0.146594	nosig	Killin OS=Homo sapiens OX=9606 GN=KLLN PE=1 SV=1	KLLN
B4DDF4	0.396	0.242	0.995	1.067	0.17	0.435	0.476	1.016	0	0.392	0.008	2.038	0	0.253	0.296	0	0	0.36	0	5.756	0.012	2.645	0.34	1.362	0	0.072	0.593	0.377	0.585	0.246	1.43987	0.497337	nosig	Calponin OS=Homo sapiens OX=9606 GN=CNN2 PE=1 SV=1	CNN2
B4DJC3	1.536	1.294	0.979	0.914	1.831	1.537	1.226	1.152	1.004	1.339	1.127	0.705	0.891	1.23	1.792	1.306	1.037	0.285	0.766	0.658	0.716	1.312	1.192	1.341	1.144	1.245	2.828	1.588	0.675	1.027	0.892328	0.366321	nosig	Histone H2A OS=Homo sapiens OX=9606 GN=MACROH2A1 PE=1 SV=1	MACROH2A1
B4DPQ0	1.448	1.401	1.301	1.533	1.297	1.34	1.53	1.505	1.432	1.597	1.03	1.135	1.392	0.859	0.674	1.407	1.009	0.884	1.194	0.686	0.981	1.074	1.385	1.299	1.311	0.823	1.307	1.014	1.053	1.227	0.75584	3.16E-06	down	Complement subcomponent C1r OS=Homo sapiens OX=9606 GN=C1R PE=1 SV=1	C1R
B4DUR8	0	0.922	1.719	0	1.198	0	0	0.74	2.619	0	0	0.395	0	0.779	0.433	0.656	0.706	0	0	0	0.456	0	0.735	0	0	7.341	0	0.273	0.396	0.707	0.894485	0.870129	nosig	T-complex protein 1 subunit gamma OS=Homo sapiens OX=9606 GN=CCT3 PE=1 SV=1	CCT3
B4E0K5	1.524	0.748	1.063	0.551	0.701	1.146	0	1.987	0	0.349	0.865	0.18	0.314	1.632	2.149	0.493	0	0.966	0.794	2.159	0.987	0.887	0.446	0.969	0	0.813	2.425	1.45	0	0.563	1.12108	0.7108	nosig	Mitogen-activated protein kinase OS=Homo sapiens OX=9606 GN=MAPK14 PE=1 SV=1	MAPK14
B4E1Z4	1.4	1.496	1.659	1.205	1.39	1.345	1.366	1.313	1.388	1.581	1.091	1.284	1.249	1.245	0.911	1.521	1.194	0.637	1.104	0.525	0.999	0.943	1.307	1.227	1.52	1.157	0.977	1.146	1.009	1.303	0.790108	0.000208271	nosig	C3/C5 convertase OS=Homo sapiens OX=9606 PE=1 SV=1	--
B4E3Q4	1.105	1.138	0.986	1.258	1.062	1.525	1.092	0.966	1.081	1.27	1.478	0.963	1.58	1.168	0.667	1.152	1.452	0.711	1.655	1.417	1.301	0.505	1.326	0.963	1.283	1.097	1.326	1.134	1.319	1.243	1.0337	0.654118	nosig	Adenosine deaminase OS=Homo sapiens OX=9606 GN=ADA2 PE=1 SV=1	ADA2
B5MDF5	1.969	0	1.177	1.272	1.044	1.82	1.05	0	0.192	1.341	1.522	1.013	1.421	1.049	0	1.306	0	1.333	0	0	1.673	0.678	0	0	0	0	1.016	0	0	1.1	0.613837	0.17167	nosig	GTP-binding nuclear protein Ran OS=Homo sapiens OX=9606 GN=RAN PE=1 SV=1	RAN
B7WNR0	1.848	1.448	1.036	1.231	0	2.321	1.088	1.129	1.204	1.426	0.599	1.166	1.804	0.999	0.729	1.653	1.232	0.787	1.903	0.51	0.497	0.529	1.713	0.886	1.122	1.177	2.136	1.128	0.796	1.193	0.885987	0.516951	nosig	Albumin OS=Homo sapiens OX=9606 GN=ALB PE=1 SV=1	ALB
B7Z2U2	0.639	0.546	1.568	1.224	0.352	0.946	0.782	1.509	0.952	0.58	0	2.199	0	0.875	0.358	0.132	0	0.729	0.472	3.855	0.335	2.508	0.46	1.258	0	0.065	1.444	0.331	0.894	0.395	0.896351	0.720706	nosig	TOM1-like protein 2 OS=Homo sapiens OX=9606 GN=TOM1L2 PE=1 SV=1	TOM1L2
B7Z3Z9	0.41	0.229	0.353	0.166	15.569	0	0.412	0.716	0.426	0.222	0	0	0.351	0.937	0.35	0	0.257	0.119	0.228	0.218	0.451	0.223	5.692	0	0	0.337	0.649	0.39	0	0	0.275685	0.40851	nosig	Long-chain-fatty-acid--CoA ligase 1 OS=Homo sapiens OX=9606 GN=ACSL1 PE=1 SV=1	ACSL1
B7Z4G8	1.307	0.902	0.834	1.457	1.298	0.994	1.809	0.902	0.951	1.337	1.035	1.334	1.93	0.613	1.523	2.189	1.278	1.344	0.798	0.215	0.842	1.849	0.168	1.216	1.251	2.148	0.837	0.981	1.265	0.925	1.00674	0.960648	nosig	Amyloid-like protein 1 OS=Homo sapiens OX=9606 GN=APLP1 PE=1 SV=1	APLP1
B7Z6Z4	0.867	0.492	1.308	0.665	0.372	0.923	1.143	1.843	0.337	0.529	0.133	0.5	0.128	0.368	0.941	0.528	0.634	0.972	0.227	4.447	0.595	1.772	1.029	1.163	0	0.644	3.563	0.603	0.425	0.959	1.15762	0.651743	nosig	Myosin light polypeptide 6 OS=Homo sapiens OX=9606 GN=MYL6 PE=1 SV=1	MYL6
B8ZWD1	1.012	0.558	1.253	0.516	0.13	0.189	0.597	1.718	0.503	0.494	0.103	1.504	0.439	0.824	4.083	0.594	0.216	0.637	0.123	4.102	0.744	1.397	0.23	1.382	0.12	0.793	2.618	0.905	0.327	0.503	1.55265	0.223517	nosig	Acyl-CoA-binding protein OS=Homo sapiens OX=9606 GN=DBI PE=1 SV=1	DBI
C9IZP8	1.345	1.143	2.212	0.601	1.6	1.441	1.986	1.57	1.784	1.366	1.035	0.977	0.943	1.095	0.62	1.615	0.597	0.118	0.989	1.036	0.925	1.402	1.369	1.627	0.758	1.251	1.003	0.737	1.369	1.593	0.699728	0.0152663	down	Complement C1s subcomponent (Fragment) OS=Homo sapiens OX=9606 GN=C1S PE=1 SV=1	C1S
C9J480	1.295	2.336	1.15	1.669	1.391	1.28	1.27	1.536	1.585	1.584	1.423	1.041	0.918	1.492	0.604	0.703	1.263	0.115	1.81	0.73	1.008	0.907	1.419	1.427	0.853	1.011	0.767	0.968	1.924	1.286	0.717707	0.00688961	down	Type 2 lactosamine alpha-2,3-sialyltransferase (Fragment) OS=Homo sapiens OX=9606 GN=ST3GAL6 PE=1 SV=1	ST3GAL6
C9J8F6	1.199	1.387	0	1.149	1.482	0	1.24	0	1.235	1.261	0.932	1.411	0	1.023	0.887	0	1.336	1.22	0.948	0.529	1.801	0	1.501	0	0	0.806	1.312	0	1.184	1.004	0.887635	0.678461	nosig	Creatine kinase U-type, mitochondrial (Fragment) OS=Homo sapiens OX=9606 GN=CKMT1A PE=1 SV=1	CKMT1A
C9JEU5	0.369	0.344	0.303	0.41	0.309	0.32	0.191	0.308	0.283	0.381	0.355	0.591	0.337	0.335	2.303	1.582	0.401	0.724	0.391	1.603	0.328	0.628	0.59	1.455	0.368	0.294	15.057	0.757	0.42	0.215	4.46457	0.142188	nosig	Fibrinogen gamma chain OS=Homo sapiens OX=9606 GN=FGG PE=1 SV=1	FGG
C9JF17	1.422	1.214	1.307	1.631	1.227	1.464	1.102	1.156	1.071	1.186	1.688	0.756	1.224	0.708	1.043	1.535	1.066	0.784	1.144	0.481	1.226	1.438	0.933	1.171	1.152	1.287	1.166	1.197	1.731	1.491	0.90849	0.213439	nosig	Apolipoprotein D (Fragment) OS=Homo sapiens OX=9606 GN=APOD PE=1 SV=1	APOD
C9JFR7	0.035	0.035	0.029	0.519	0.533	0	0	0.079	0.378	0.397	1.641	0.778	0	2.17	4.521	0.024	0.019	1.242	0.032	2.751	2.738	2.757	0.764	0	0.57	0.02	0.662	0.868	0.38	0.366	5.56185	0.0048065	up	Cytochrome c (Fragment) OS=Homo sapiens OX=9606 GN=CYCS PE=1 SV=1	CYCS
C9JIU5	1.395	1.219	1.091	1.031	0.891	0.888	1.002	1.18	0.704	1.035	1.492	0.933	1.078	1.173	0	1.122	0.843	2.357	1.226	0.322	0.893	0.722	1.581	0.924	0	1.061	1.846	1.813	1.454	1.819	1.08562	0.554262	nosig	E3 ubiquitin-protein ligase TRIM22 (Fragment) OS=Homo sapiens OX=9606 GN=TRIM22 PE=1 SV=1	TRIM22
C9JIZ6	1.087	1.104	1.161	1.34	0.849	1.006	0.877	1.005	1.345	0.557	1.151	1.145	1.151	1.13	1.873	1.513	1.16	1.039	1.534	1.32	1.375	1.103	0.933	1.142	1.169	0.917	1.053	1.202	1.191	0.682	1.15105	0.11132	nosig	Prosaposin OS=Homo sapiens OX=9606 GN=PSAP PE=1 SV=2	PSAP
C9JMK5	0.644	0.634	0.637	0.682	0.644	0.608	0.581	0.67	0.585	0.438	0.879	0.835	0.965	0.783	3.581	1.262	1.131	2.56	1.233	2.072	1.434	0.645	1.136	1.057	1	0.759	0.768	1.033	0.913	0.96	2.04197	0.000790631	up	Phosphoinositide-3-kinase-interacting protein 1 (Fragment) OS=Homo sapiens OX=9606 GN=PIK3IP1 PE=1 SV=8	PIK3IP1
C9JNG9	1.163	1.315	1.666	0	1.432	1.359	0	0	0	1.048	0	0	0	1.488	1.038	1.052	1.183	0.432	1	0.971	0.963	1.182	0	0	1.174	1.073	0	0.885	0	0	0.779218	0.500482	nosig	Collagen alpha-3(VI) chain (Fragment) OS=Homo sapiens OX=9606 GN=COL6A3 PE=1 SV=1	COL6A3
C9JPG5	1.303	1.636	1.241	1.628	0.745	1.067	1.777	1.185	1.811	1.222	1.317	1.807	1.247	0.786	1.734	0.185	0.964	1.062	1.047	0.382	0.906	1.107	0.921	1.501	1.95	1.019	1.098	0.82	0.859	1.608	0.819684	0.109354	nosig	Semaphorin-3F OS=Homo sapiens OX=9606 GN=SEMA3F PE=1 SV=1	SEMA3F
C9JQU8	0.939	1.26	1.473	1.335	0.991	1.428	0	0	1.379	1.76	0.896	1.171	0.838	1.001	1.376	1.001	0.82	1.609	1.423	0.854	0.865	1.315	0	0.809	1.144	0.999	0.546	0.953	1.626	1.017	0.958968	0.838229	nosig	Neuroserpin (Fragment) OS=Homo sapiens OX=9606 GN=SERPINI1 PE=1 SV=1	SERPINI1
C9JUG7	2.311	0.174	0.143	2.137	3.048	0.539	0	0.141	2.431	0	0	0.768	0	0.145	0.651	0.609	0	0	0	0.287	1.384	0.089	0.212	1.497	0.172	0.238	9.068	1.039	0.262	0.178	0.759749	0.660393	nosig	F-actin-capping protein subunit alpha OS=Homo sapiens OX=9606 GN=CAPZA2 PE=1 SV=1	CAPZA2
C9JYY6	0.449	0.531	0.249	0.878	0.467	0.331	0.362	0.7	0.281	0.563	0.719	0.985	0.869	0.616	0.842	0.819	0.649	5.276	0.431	3.026	1.047	1.859	0.73	0.944	0.499	1.002	0.593	1.192	0.762	0.633	2.44159	0.0139428	up	Neuronal cell adhesion molecule OS=Homo sapiens OX=9606 GN=NRCAM PE=1 SV=3	NRCAM
D6RAR4	1.021	1.963	1.451	1.53	1.681	1.033	1.439	1.584	1.556	1.707	1.389	1.324	1.528	0.823	0.673	2.028	0.933	0.357	1.026	0.11	1.592	1.19	1.263	1.354	1.177	0.972	1.302	1.011	1.228	1.063	0.746509	0.00811483	down	Hepatocyte growth factor activator OS=Homo sapiens OX=9606 GN=HGFAC PE=1 SV=1	HGFAC
D6RBX5	0.296	0	0.705	0.043	0.609	0	1.81	0.586	0.41	0	0.46	0	0	3.659	0.332	0.038	2.445	0	0	0.064	1.457	3.792	1.271	0	0.079	0	2.599	0	0	1.531	1.98778	0.200382	nosig	Secretoglobin family 3A member 2 OS=Homo sapiens OX=9606 GN=SCGB3A2 PE=1 SV=1	SCGB3A2
D6RD58	1.383	1.897	1.668	1.442	1.063	1.335	1.689	1.346	1.857	1.622	1.198	2.122	1.124	1.77	0.427	1.443	1.745	0.387	1.473	0.344	0.975	0.488	1.329	1.048	1.217	0.936	0.861	0.935	1.172	1.173	0.724317	0.00404935	down	Leukocyte cell-derived chemotaxin-2 OS=Homo sapiens OX=9606 GN=LECT2 PE=1 SV=2	LECT2
D6RFN0	0	2.07	1.158	1.51	0	0	2.52	0	1.663	0	1.73	0	1.292	1.302	0.188	0.155	0	0.306	1.486	0.343	1.244	0	0	0	2.905	1.347	0.148	1.061	0	0	0.757034	0.562545	nosig	COP9 signalosome complex subunit 4 OS=Homo sapiens OX=9606 GN=COPS4 PE=1 SV=1	COPS4
D6RH31	1.053	1.403	1.565	0	1.023	1.582	2.105	1.485	1.674	1.379	1.648	1.83	1.372	0.963	0.706	0.45	1.121	0	1.41	0.304	0.918	1.181	1.178	0.872	1.361	1.709	0.261	1.182	1.377	1.822	0.816377	0.267068	nosig	Nephronectin (Fragment) OS=Homo sapiens OX=9606 GN=NPNT PE=1 SV=1	NPNT
D6RHI9	1.052	1.322	0.779	0.823	0.979	0.747	1.203	1.359	1.021	0.956	0.939	1.665	1.253	1.173	1.522	1.284	0.978	0.525	1.841	1.146	1.382	1.194	1.227	1.613	0.929	1.247	0.953	1.048	1.121	1.56	1.20105	0.0436868	nosig	Ribonuclease T2 (Fragment) OS=Homo sapiens OX=9606 GN=RNASET2 PE=1 SV=8	RNASET2
E5RFU2	0	2.542	0.354	0	0.871	0	0	0.455	0.605	0	0.438	2.139	0.089	9.864	2.123	0.549	0.26	0.082	0.32	0.485	0	0.837	0	0.229	1.28	0.131	0.161	0.261	0	0	1.99378	0.390817	nosig	Bifunctional epoxide hydrolase 2 OS=Homo sapiens OX=9606 GN=EPHX2 PE=1 SV=1	EPHX2
E5RIA4	1.145	0	0	0.216	0.409	0	0	0	0.266	1.06	0	1.089	0	1.96	5.972	0	0	0.279	0	0.581	0.535	0.837	0	0	0	0.078	0.675	0.386	0	0.458	2.07526	0.326582	nosig	Aspartyl aminopeptidase OS=Homo sapiens OX=9606 GN=DNPEP PE=1 SV=1	DNPEP
E7EPV7	0.167	0.896	1	0.861	0.542	1.092	0.575	0.979	0.582	1.008	0.659	1.073	1.553	0.344	0.408	1.772	1.21	1.825	0.943	2.309	1.139	2.168	0.687	1.652	0.415	1.242	1.933	1.64	0.578	0.73	1.57621	0.0121912	up	Alpha-synuclein OS=Homo sapiens OX=9606 GN=SNCA PE=1 SV=1	SNCA
E7EQB2	0.896	0.736	0.557	0.774	0.426	0.784	0.656	0.811	0.505	0.834	0.325	4.398	0.791	0.293	0.415	1.727	0.502	1.027	0.853	2.996	2.06	0.457	0.52	4.188	0.662	0.664	0.34	0.531	0.677	1.505	1.78614	0.0666475	nosig	Lactotransferrin (Fragment) OS=Homo sapiens OX=9606 GN=LTF PE=1 SV=1	LTF
E7ESC6	0	0.766	0.675	0	0	0.985	1.904	1.129	0	0	1.16	1.191	3.628	1.25	0.44	0.689	0	0	0	0	2.554	0	1.18	1.124	0	0	0.469	0	1.609	0.808	1.47481	0.3974	nosig	Exportin-7 OS=Homo sapiens OX=9606 GN=XPO7 PE=1 SV=1	XPO7
E7EUF1	0.796	0.742	0.441	0.888	0.627	0.407	0.557	0.41	0.494	1.104	1.043	1.241	1.077	0.922	1.691	1.361	1.384	1.615	1.425	1.446	1.196	3.851	0.756	1.141	0.761	0.769	0.844	1.134	1.325	0.738	1.98886	0.000719609	up	Ectonucleotide pyrophosphatase/phosphodiesterase family member 2 OS=Homo sapiens OX=9606 GN=ENPP2 PE=1 SV=1	ENPP2
E7EUJ1	0.772	0.78	0.983	0.203	1.014	1.033	2.943	0	1.418	0.863	0	1.152	0	0	0.497	0.58	0	0	0	0.113	2.162	0	1.443	0	0.751	2.892	0	0	2.875	1.638	0.704516	0.387165	nosig	Hepatic triacylglycerol lipase OS=Homo sapiens OX=9606 GN=LIPC PE=1 SV=1	LIPC
E7EVJ3	0.719	0.857	1.118	0.678	0.947	1.177	0.8	0.681	0.582	0.745	0.825	1.431	1.761	0.986	1.562	2.407	1.337	1.258	1.006	0.94	1.718	0.765	1.175	1.24	0.728	1.078	1.956	1.54	1.024	1.539	1.58213	0.000237081	up	[Heparan sulfate]-glucosamine N-sulfotransferase OS=Homo sapiens OX=9606 GN=NDST1 PE=1 SV=1	NDST1
E7EW33	2.148	1.726	1.401	0.884	0	1.431	0.828	0.238	0.245	0	3.603	1.43	0.889	0.366	1.458	0	2.669	0.219	1.374	0.484	0	0.416	0	1.391	1.726	0.978	1.837	1.725	0.187	0.646	1.202	0.582901	nosig	Cytoplasmic FMR1-interacting protein 2 OS=Homo sapiens OX=9606 GN=CYFIP2 PE=1 SV=1	CYFIP2
E7EX44	0.162	0.53	0.313	0.511	0.601	0.23	0.973	1.321	0.705	0.978	0.746	0.643	0	1.036	0.8	0.544	0.743	0.104	0	5.649	1.834	0.526	0.561	0.834	1.073	0	0.765	0.874	0.776	0	1.38425	0.417832	nosig	Caldesmon OS=Homo sapiens OX=9606 GN=CALD1 PE=1 SV=1	CALD1
E9PBC5	1.567	0.633	0.712	1.082	1.04	1.042	1.75	0.908	0.845	1.204	0.999	2.365	1.446	1.253	0	0.688	2.048	0	1.525	0	0.838	0.636	2.028	1.048	1.188	1.136	1.123	1.037	1.048	3.137	1.09167	0.639684	nosig	Plasma kallikrein OS=Homo sapiens OX=9606 GN=KLKB1 PE=1 SV=2	KLKB1
E9PC41	0.296	0	0.148	0.245	0.159	0	0.082	0.202	0	0	0.285	0.198	0.265	0.089	6.268	0.159	0.275	0.595	0	6.468	0.148	0.018	0.352	0.151	0	0.185	0.228	0.305	0.09	0.182	7.18242	0.117796	nosig	Interleukin-1 receptor-like 1 OS=Homo sapiens OX=9606 GN=IL1RL1 PE=1 SV=1	IL1RL1
E9PC52	0.3	0	0	0	2.472	0	0.328	1.007	1.856	0.526	1.625	0	0	0	7.473	0.2	0.07	0.683	0.358	0.202	1.506	0.085	0.184	0.21	0	0	0.715	0.331	0	0	1.05116	0.943426	nosig	Histone-binding protein RBBP7 OS=Homo sapiens OX=9606 GN=RBBP7 PE=1 SV=1	RBBP7
E9PCM6	3.125	1.186	1.347	2.458	1.55	0.943	1.421	0.686	1.065	0.726	1.016	1.556	0.594	0.68	0.569	1.181	0.348	3.093	1.201	0.711	1.829	1.48	0.575	0.772	0.821	0.647	0.512	0.759	0.921	0.44	0.679155	0.121213	nosig	Rho GTPase-activating protein 4 OS=Homo sapiens OX=9606 GN=ARHGAP4 PE=1 SV=1	ARHGAP4
E9PD35	0.963	0.905	0.826	0.68	0.635	0.521	0.759	0.932	0.96	1.061	0.968	0.949	1.238	0.973	1.336	0.836	0.968	2.103	1.216	2.627	1.078	1.602	0.868	0.932	0.942	0.977	0.392	1.055	1.406	0.728	1.40706	0.0111118	up	Vascular endothelial growth factor receptor 3 OS=Homo sapiens OX=9606 GN=FLT4 PE=1 SV=1	FLT4
E9PE17	0.987	1.199	1.1	1.923	1.381	0.755	1.133	0.712	1.195	1.386	0.837	1.139	1.403	0.894	0.945	0.854	1.315	2.52	1.055	0.986	1.434	1.168	0.935	1.071	1.054	0.949	0.735	0.869	0.996	1.215	0.950387	0.67814	nosig	28S ribosomal protein S17, mitochondrial (Fragment) OS=Homo sapiens OX=9606 GN=MRPS17 PE=1 SV=1	MRPS17
E9PEK4	0.025	0.053	0.697	0.741	0.743	0.043	0.043	0.073	0.043	0.759	1.306	1.297	2.656	0.828	0.923	0.116	1.16	2.671	1.776	3.945	1.167	1.208	0.879	1.054	0.694	0.035	1.411	1.008	1.594	0.047	4.00233	0.000379343	up	Receptor protein-tyrosine kinase OS=Homo sapiens OX=9606 GN=CSF1R PE=1 SV=1	CSF1R
E9PEP6	0.896	0.36	0.604	0.813	0.678	0.743	0.573	0.754	0.625	1.038	0.778	0.729	1.195	0.702	1.078	1.324	0.824	2.93	1.265	1.981	1.457	1.923	0.96	1.256	1.056	1.119	0.908	0.957	0.857	1.188	1.72833	0.000617816	up	Neuropilin OS=Homo sapiens OX=9606 GN=NRP1 PE=1 SV=2	NRP1
E9PGM4	0.722	1.472	1.251	2.036	1.179	0.466	1.677	0.773	1.141	0.903	1.39	1.477	0.691	4.763	1.068	1.505	0.937	0.052	0.927	0.28	0.941	1.106	1.407	0.714	0.804	1.256	1.04	1.244	1.898	1.459	1.07397	0.740596	nosig	1,4-alpha-glucan branching enzyme OS=Homo sapiens OX=9606 GN=GBE1 PE=1 SV=1	GBE1
E9PGN7	0.961	1.057	1.575	1.176	1.336	1.043	1.678	1.023	1.083	1.315	1.46	1.105	1.367	1.157	0.864	1.3	1.315	0.715	1.211	0.608	1.419	1.058	1.471	1.148	1.413	1.246	1.122	1.32	1.315	1.259	0.974647	0.744705	nosig	Plasma protease C1 inhibitor OS=Homo sapiens OX=9606 GN=SERPING1 PE=1 SV=1	SERPING1
E9PHX8	0.674	0.878	0.835	1.12	0.977	0.685	0.962	0.556	0.645	0.898	1.15	1.157	1.279	0.944	1.184	1.163	1.053	2.604	1.083	2.745	0.858	0.889	0.79	0.692	0.918	0.924	0.871	0.942	1.061	0.729	1.39951	0.0214094	up	Receptor protein-tyrosine kinase OS=Homo sapiens OX=9606 GN=MERTK PE=1 SV=1	MERTK
E9PHY0	1.79	2.394	1.585	1.261	0.493	1.21	0.51	2.395	0.342	1.733	0.618	0	1.58	1.109	0	0.516	0.52	0.059	1.423	1.282	0.594	1.449	0	1.751	1.437	1.003	0	0.57	1.813	1.473	0.627033	0.0840291	nosig	Lysosomal acid phosphatase OS=Homo sapiens OX=9606 GN=ACP2 PE=1 SV=1	ACP2
E9PK25	1.391	0.95	1.054	1.073	0.945	1.351	1.318	1.195	1.019	1.015	1.252	1.124	1.161	0.877	0.799	0.866	0.925	1.445	0.855	1.951	1.242	0.753	0.899	1.174	1.051	0.786	1.544	1.147	1.137	1.335	0.986783	0.862597	nosig	Cofilin, non-muscle isoform OS=Homo sapiens OX=9606 GN=CFL1 PE=1 SV=1	CFL1
E9PKU7	0.901	1.223	0.99	0.682	1.546	0.938	0.799	1.675	0.818	0.691	1.047	1.675	1.812	1.153	1.328	1.252	1.541	0.42	1.024	0.53	1.71	0.933	1.507	1.291	1.273	0.93	2.071	1.208	1.666	1.389	1.25499	0.0815205	nosig	Neutral alpha-glucosidase AB OS=Homo sapiens OX=9606 GN=GANAB PE=1 SV=1	GANAB
E9PLT1	1.035	0.496	0.847	0.307	0.398	0.614	0.242	0.59	2.584	0.489	0.286	0.247	0.237	0.771	2.65	0	0.109	3.21	2.493	2.245	0.368	2.854	0.276	0.168	0.278	0.559	0.262	0.489	3.079	0.596	1.39286	0.385971	nosig	Glycoprotein IIIb OS=Homo sapiens OX=9606 GN=CD36 PE=1 SV=1	CD36
E9PMV2	0.844	0.884	0	1.014	0.735	1.734	0.824	0.382	0.684	0.655	0.847	1.255	1.048	0.923	0.93	2.014	0.801	0.804	2.999	1.833	1.305	1.097	1.27	0.894	1.539	0.749	0.649	0	1.572	1.13	1.52521	0.0494331	up	HLA class II histocompatibility antigen, DQ alpha 1 chain (Fragment) OS=Homo sapiens OX=9606 GN=HLA-DQA1 PE=1 SV=1	HLA-DQA1
E9PQD7	1.301	0	1.21	1.247	1.228	0	1.48	1.296	1.076	0	1.703	1.537	0	0.991	0	0	0.858	0	1.278	0.294	1.227	0.768	0	0.742	1.243	0	1.681	1.849	1.451	0	0.883797	0.684318	nosig	40S ribosomal protein S2 OS=Homo sapiens OX=9606 GN=RPS2 PE=1 SV=1	RPS2
F5GWI4	0.068	0	0.793	0.281	1.098	0.045	0	0	0.094	0.232	1.837	0	1.051	1.658	1.383	0.065	0.099	0.895	1.026	4.404	0.281	1.618	1.12	0	1.102	0.067	0.057	1.346	0	0	3.44868	0.0230283	up	Adenosine deaminase OS=Homo sapiens OX=9606 GN=ADA PE=1 SV=1	ADA
F5GX88	1.042	1.175	1.06	0.718	1.14	1.135	1.011	1.152	1.139	0.856	1.622	0.845	1.104	1.416	0.744	0.96	1.401	1.581	1.289	0.539	1.771	1.647	1.181	1.19	1.367	1.161	1.229	1.402	1.139	1.217	1.18935	0.0255351	nosig	Endoglin OS=Homo sapiens OX=9606 GN=ENG PE=1 SV=1	ENG
F5GY03	1.337	1.818	1.797	1.764	1.434	1.372	0.968	1.687	1.807	1.809	0.813	0.677	0	1.695	0.885	0.683	0.991	0.513	2.024	0.77	1.135	0.864	0.77	1.059	1.211	1.288	0.346	0.701	1.534	1.272	0.608846	0.000137564	down	Osteonectin (Fragment) OS=Homo sapiens OX=9606 GN=SPARC PE=1 SV=1	SPARC
F5GZS6	1.244	1.247	1.138	1.212	1.181	1.865	1.504	0.846	1.132	1.108	1.352	0.605	0.32	0.248	1.211	0.542	0.501	2.062	0.553	2.728	1.049	2.455	0.65	1.053	0.615	0.495	0.452	0.732	0.82	0.524	0.760079	0.105433	nosig	4F2 cell-surface antigen heavy chain OS=Homo sapiens OX=9606 GN=SLC3A2 PE=1 SV=1	SLC3A2
F5GZZ9	0.369	0.48	0.398	0.528	0.444	0.383	0.348	0.471	0.421	0.549	0.725	0.887	0.775	0.484	2.379	0.995	0.718	3.86	1.078	4.684	0.445	0.756	0.64	0.499	0.593	0.532	0.493	0.529	0.837	0.516	2.55352	0.0169799	up	Scavenger receptor cysteine-rich type 1 protein M130 OS=Homo sapiens OX=9606 GN=CD163 PE=1 SV=1	CD163
F5H3Z4	0	0.692	0	0.575	0.379	0.494	0.248	0.581	0.539	1.269	0.634	0.635	0.85	0.52	2.88	0.847	0.86	2.114	2.205	2.44	1.058	1.862	0.695	0.484	0.472	0.643	1.466	1.505	0.518	0.55	2.43228	0.00234722	up	Folate receptor beta (Fragment) OS=Homo sapiens OX=9606 GN=FOLR2 PE=1 SV=1	FOLR2
F5H423	1.102	0	1.294	0.949	0	1.061	0.597	1.282	0.763	0.609	0	0.742	0.52	0.632	1.153	1.201	0	0.455	0.562	2.424	0.775	2.203	0.588	1.684	0.716	0.808	1.229	2.105	1.091	0.671	1.2772	0.32695	nosig	Uncharacterized protein OS=Homo sapiens OX=9606 PE=3 SV=1	--
F5H5T6	0	0	0	1.254	1.152	1.215	0.576	0.82	1.208	0	0.735	1.411	1.177	1.526	0.878	1.165	1.506	0.781	1.472	0.491	1.596	1.312	1.442	1.289	1.606	1.137	1.439	0.801	1.229	0	1.84683	0.0217852	up	Uncharacterized protein (Fragment) OS=Homo sapiens OX=9606 PE=3 SV=1	--
F6SYF8	0.759	0.727	0	0.846	0.926	0.682	0.792	0.806	0.473	1.008	0.825	1.035	0	0.585	3.65	0.97	0	1.243	0.96	1.326	1.152	1.642	0.851	1.153	0.88	0.968	0.963	0.935	1.4	0	1.46303	0.103636	nosig	Dickkopf-related protein 3 OS=Homo sapiens OX=9606 GN=DKK3 PE=1 SV=1	DKK3
F6WIT2	0	0.6	0.569	0	0	1.151	0.981	0	0.069	0	0	1.629	4.341	0	1.238	1.095	0	0.095	0	1.387	0.975	1.028	1.193	1.175	0	0	0.996	0.067	0	1.284	2.44852	0.0818074	nosig	Serine/threonine-protein phosphatase 2A activator OS=Homo sapiens OX=9606 GN=PTPA PE=1 SV=1	PTPA
F8W0A0	0.985	0.687	0.738	1.488	1.236	0	0	0.526	1.334	0	0.996	0	0.539	0	1.261	0	0	1.327	0.645	2.541	0.834	0.839	0	0.445	0	0	0	0	0.429	0.559	0.744567	0.449319	nosig	Phenylalanine-4-hydroxylase (Fragment) OS=Homo sapiens OX=9606 GN=PAH PE=1 SV=1	PAH
F8W703	0.892	0.691	0	1.013	1.184	0.804	0	0.644	0.598	0.877	0.977	1.499	0	0	0	1.183	0	2.152	0	1.22	1.165	1.482	0	1.309	1.014	0.538	0.969	1.26	0	0.978	1.17455	0.551265	nosig	Roundabout homolog 2 OS=Homo sapiens OX=9606 GN=ROBO2 PE=1 SV=1	ROBO2
F8W809	1.395	0.87	0.665	0.734	0.683	0.839	0.777	0.719	0.483	0.699	0.986	1.314	1.157	1.072	3.038	0.602	1.046	1.3	0.967	1.649	1.264	1.919	0.887	1.008	0.874	0.579	0.849	0.666	2.173	1.283	1.56619	0.00672047	up	Thioredoxin-disulfide reductase OS=Homo sapiens OX=9606 GN=TXNRD1 PE=1 SV=1	TXNRD1
F8W876	0	0	0	0.609	0.303	0.788	1.538	0.367	0	1.243	0.234	0.198	0.307	1.94	1.475	0.331	1.579	2.635	0.774	1.016	3.413	1.684	0.244	0.342	0.898	0.323	1.565	1.019	2.691	0.243	2.36293	0.0242757	up	Mannan-binding lectin serine protease 1 OS=Homo sapiens OX=9606 GN=MASP1 PE=1 SV=1	MASP1
F8W8N3	0	0.933	0.722	0.821	0	0	1.215	0.573	0	1.112	1.102	0.708	1.78	0	0.936	3.311	0	0.603	0	0	0.755	0.85	0	2.618	1.554	0.546	1.524	1.738	0.812	0.803	1.82664	0.0922529	nosig	Cyclin-A/CDK2-associated protein p19 (Fragment) OS=Homo sapiens OX=9606 GN=SKP1 PE=1 SV=1	SKP1
F8W9U3	0.73	1.086	1.104	0	1.072	0	1.724	0.644	1.164	0	0	1.141	0	1.115	0.701	1.496	0	0.413	0	1.102	0.65	1.217	2.142	1.042	0	1.157	2.131	0	0.745	1.295	1.08632	0.791416	nosig	Protein ABHD14B OS=Homo sapiens OX=9606 GN=ABHD14B PE=1 SV=1	ABHD14B
F8WA42	0.838	1.166	1.246	0.675	1.074	1.833	1.231	1.274	1.387	1.257	0.805	1.426	1.366	0.658	1.246	1.352	1.249	1.881	1.743	0.812	0.286	0.953	1.368	1.45	0.512	0.775	1.634	0.767	1.556	1.077	0.956348	0.708137	nosig	Inactive C-alpha-formylglycine-generating enzyme 2 OS=Homo sapiens OX=9606 GN=SUMF2 PE=1 SV=1	SUMF2
F8WAR7	0.811	0.761	0.788	1.335	0.634	0.912	0.798	1.383	0.651	0.679	1.187	1.005	1.066	1.25	1.388	0.886	0.857	1.094	0.748	3.119	0.996	0.942	1.013	0.939	2.187	0.887	0.768	0.752	1.147	0.695	1.30976	0.08597	nosig	Carboxylic ester hydrolase OS=Homo sapiens OX=9606 GN=ACHE PE=1 SV=1	ACHE
F8WCI3	0.901	0.676	0.589	0.869	0	0.975	0.761	0.722	0	0.719	1.136	1.025	0.842	0.873	0.647	1.409	0.887	1.714	1.743	3.08	0.565	1.328	0.654	1.146	1.219	0.731	0.638	1.148	0.832	0.903	1.81262	0.00575648	up	CDK5 regulatory subunit-associated protein 2 OS=Homo sapiens OX=9606 GN=CDK5RAP2 PE=1 SV=1	CDK5RAP2
F8WDW9	1.128	0.448	1.023	1.528	0.399	1.171	0.91	1.128	1.494	1.105	1.431	0.953	1.197	1.188	1.324	1.086	1.122	1.083	1.608	1.263	0.727	1.414	1.106	1.531	1.039	1.094	0.808	1.422	1.448	1.09	1.15802	0.229387	nosig	Endothelial cell-selective adhesion molecule OS=Homo sapiens OX=9606 GN=ESAM PE=1 SV=1	ESAM
F8WE86	1.328	0.466	1.464	1.372	0.598	0.319	1.219	0.312	0.505	0.949	0.959	1.081	0.339	0.289	3.768	0.435	0.35	2.008	1.01	3.311	0.489	0.948	0.466	1.129	0.672	0.695	0.696	0.255	0.814	1.404	1.23758	0.439509	nosig	Transcobalamin-2 OS=Homo sapiens OX=9606 GN=TCN2 PE=1 SV=2	TCN2
G3V203	1.358	1.626	1.264	1.029	1.867	1.277	1.188	1.495	1.597	1.47	1.241	1.233	1.798	1.375	0.714	1.484	1.125	0.348	1.468	0.254	1.603	0.953	1.061	1.234	1.276	1.733	0.675	1.346	0.957	1.093	0.810493	0.0344102	nosig	60S ribosomal protein L18 OS=Homo sapiens OX=9606 GN=RPL18 PE=1 SV=1	RPL18
G3V2W1	1.273	1.669	1.536	1.217	1.3	1.16	1.823	0.905	1.303	1.507	1.551	1.555	1.29	1.688	0.951	1.69	1.632	0.35	1.432	0.264	1.304	0.603	1.37	0.841	1.679	1.057	1.1	0.725	1.101	1.398	0.86106	0.154462	nosig	Protein Z-dependent protease inhibitor OS=Homo sapiens OX=9606 GN=SERPINA10 PE=1 SV=1	SERPINA10
G3V3A0	1.45	1.497	1.405	1.396	1.44	1.1	1.522	1.432	1.222	1.624	1.194	1.118	1.536	0.749	1.076	1.699	1.02	0.738	1.089	0.577	1.164	1.18	1.205	0.978	1.347	1.056	1.236	0.885	0.84	1.425	0.784781	0.000532317	nosig	Alpha-1-antichymotrypsin OS=Homo sapiens OX=9606 GN=SERPINA3 PE=1 SV=1	SERPINA3
G3V3E8	0.952	0.84	0.564	0.132	1.165	0.749	0.793	0.933	1.295	0.261	1.396	0.677	0.957	0.121	1.279	1.562	0.407	4.006	1.439	2.249	1.505	0.566	0.539	1.699	0.498	1.135	0.136	0.816	1.059	1.305	1.51946	0.0883058	nosig	Epididymal secretory protein E1 OS=Homo sapiens OX=9606 GN=NPC2 PE=1 SV=1	NPC2
G3V489	1.316	1.712	1.206	1.793	1.573	1.562	2.169	1.454	1.553	1.297	1.422	1.265	1.558	1.172	0.691	1.211	1.438	0.68	1.536	0.186	1.1	0.764	1.197	0.685	1.371	1.072	1.186	0.861	1.118	1.21	0.694691	0.000548344	down	Troponin I, slow skeletal muscle (Fragment) OS=Homo sapiens OX=9606 GN=TNNI1 PE=1 SV=1	TNNI1
G3V4U0	0.9	0.225	0.219	0.545	0.266	0.248	0.575	0.283	0.584	0.447	0.355	1.242	0.765	0.527	3.129	1.531	0.768	1.396	0.891	4.391	1.477	1.76	0.602	1.245	0.426	0.987	0.396	0.598	0.666	0.595	2.76643	0.00356166	up	Fibulin-5 OS=Homo sapiens OX=9606 GN=FBLN5 PE=1 SV=1	FBLN5
G8JLG2	1.464	1.759	1.457	1.792	1.669	1.518	1.536	1.44	1.625	1.465	1.767	1.225	1.157	1.668	0.96	1.095	1.608	0.368	1.264	0.202	0.862	0.593	1.152	0.671	1.287	1.07	0.977	1.339	1.377	1.085	0.690843	4.82E-05	down	Corneodesmosin OS=Homo sapiens OX=9606 GN=CDSN PE=1 SV=1	CDSN
H0Y2Y8	0.556	0.108	0.715	1.357	0.103	0.62	0.715	0.427	0.724	0	0	0.858	0	0.808	0.192	0.259	0.29	0.993	0.135	5.607	0.47	3.259	0.298	1.031	0	0.04	0.914	0.499	0.897	0.323	1.58432	0.346202	nosig	Zyxin (Fragment) OS=Homo sapiens OX=9606 GN=ZYX PE=1 SV=1	ZYX
H0Y4S8	2.15	0.891	0.879	0.85	1.195	1.524	1.581	1.338	0.868	0.634	1.732	1.362	1.614	1.2	0.755	1.021	1.343	0.754	0.948	0.637	2.083	0.64	1.299	1.674	1.082	0.861	1.167	1.126	1.351	1.653	1.02024	0.88971	nosig	Dyslexia-associated protein KIAA0319-like protein (Fragment) OS=Homo sapiens OX=9606 GN=KIAA0319L PE=1 SV=1	KIAA0319L
H0Y512	0.996	0.761	1.138	1.523	1.071	1.093	0.74	0.935	1.132	2.143	1.521	1.055	1.575	1.149	0.765	2.084	1.348	0.817	1.573	0.413	1.21	1.304	0.756	0.965	1.66	1.244	0.826	1.41	1.695	1.247	1.06733	0.629222	nosig	Adipocyte plasma membrane-associated protein (Fragment) OS=Homo sapiens OX=9606 GN=APMAP PE=1 SV=1	APMAP
H0Y755	0.688	1.053	0.657	0.648	0.521	0.68	0.501	0.608	0.446	1.207	0.865	0.887	1.092	1.841	0.66	0.868	0.486	1.821	1.846	3.588	2.596	1.115	0.682	0.833	0.678	0.82	0.929	0.533	0.641	0.656	1.67192	0.0222336	up	Low affinity immunoglobulin gamma Fc region receptor III-A OS=Homo sapiens OX=9606 GN=FCGR3A PE=1 SV=3	FCGR3A
H0Y7Z1	1.348	1.723	1.564	1.296	0.949	1.512	1.682	1.546	1.626	1.522	1.284	1.56	1.299	1.139	0.745	0.624	1.112	0.299	1.414	0.25	0.702	1.809	0.911	0.985	1.796	2.048	0.457	1.292	1	1.454	0.750948	0.0101417	down	Fibronectin (Fragment) OS=Homo sapiens OX=9606 GN=FN1 PE=1 SV=1	FN1
H0YBX6	0.378	0.637	1.242	0.946	0.273	0.959	0.491	1.105	0.358	0.978	0.66	1.051	1.302	0.567	1.025	1.443	0.891	0.054	0.626	3.02	1.262	2.902	0.637	1.723	0	0.887	1.861	1.183	0.916	0.917	1.55606	0.0563097	nosig	Ubiquitin-conjugating enzyme E2 variant 2 (Fragment) OS=Homo sapiens OX=9606 GN=UBE2V2 PE=1 SV=1	UBE2V2
H0YCU9	1.164	0.999	1.003	1.13	0.974	1.022	1.769	1.117	1.011	1.008	1.159	0.887	0.923	0.859	4.594	1.046	1.13	1.156	1.282	0.585	0.661	0.426	1.031	1.283	1.151	1.211	0.967	1.016	0.8	1.028	1.03577	0.844662	nosig	Transgelin (Fragment) OS=Homo sapiens OX=9606 GN=TAGLN PE=1 SV=1	TAGLN
H0YEX4	1.322	0	0.547	1.69	0.078	0	0.204	0	0.111	0.091	0	0	0.639	0.169	0	0.109	0.163	0	4.246	3.424	0	0	0	0.997	0	0.282	0.267	3.348	0.569	0.182	1.78024	0.375723	nosig	Cell adhesion molecule-related/down-regulated by oncogenes (Fragment) OS=Homo sapiens OX=9606 GN=CDON PE=1 SV=1	CDON
H0YFD6	1.841	1.313	1.495	0.986	2.509	0.428	1.918	1.77	1.606	1.285	0.384	1.614	0.814	0.524	0.62	0.425	0.357	1.638	1.589	1.208	2.347	0.415	0.305	0.307	1.788	1.479	0.346	1.815	0.646	0	0.614514	0.0212572	down	Enoyl-CoA hydratase OS=Homo sapiens OX=9606 GN=HADHA PE=1 SV=2	HADHA
H0YIJ6	0.987	2.466	1.271	1.424	2.027	0.934	2.153	1.096	2.849	1.824	0.976	1.025	0.889	1.586	0.843	1.188	1.817	0.166	0.96	0.136	0.889	1.21	1.51	1.097	1.037	0.965	0.869	1.056	1.097	1.355	0.606864	0.0120303	down	Phosphatidylinositol 5-phosphate 4-kinase type-2 gamma (Fragment) OS=Homo sapiens OX=9606 GN=PIP4K2C PE=1 SV=8	PIP4K2C
H0YJU2	1.672	3.413	1.972	1.662	1.748	1.223	1.767	2.013	1.852	1.906	2.038	0.59	1.362	0.955	0.673	0.583	1.01	0.491	0.917	0.394	0.857	0.733	1.024	0.932	1.704	0.838	0.746	0.746	1.078	0.736	0.478651	0.000216122	down	Activator of 90 kDa heat shock protein ATPase homolog 1 (Fragment) OS=Homo sapiens OX=9606 GN=AHSA1 PE=1 SV=1	AHSA1
H0YL69	0.585	0.354	0.819	0.354	0.473	0.899	0.09	0.103	0	0.102	0.329	1.533	0.89	4.41	7.821	0.869	0.275	1.387	0.729	1.091	0.575	0.809	0.576	0.877	0.306	0.737	1.162	0.466	0.21	0.914	3.43556	0.0351356	up	Proteasome subunit alpha type (Fragment) OS=Homo sapiens OX=9606 GN=PSMA4 PE=1 SV=1	PSMA4
H0YNG5	1.949	0.576	0.906	0.804	0.203	1.143	0.15	0.714	0.206	0.817	1.032	0.753	0.17	1.175	0.948	0.748	1.21	1.784	1.04	1.457	2.001	1.733	1.478	1.29	2.208	0.995	1.104	1.327	2.321	0.953	1.72248	0.0179854	up	Alpha-mannosidase OS=Homo sapiens OX=9606 GN=MAN2A2 PE=1 SV=1	MAN2A2
H3BN98	0.812	1.089	1.185	0.649	2.199	1.116	1.733	1.511	1.914	0.554	2.015	0.854	1.345	0.824	1.653	0.977	1.275	0	0.901	0.259	1.327	0.111	1.334	0.838	1.184	1.322	1.446	2.907	1.258	1.356	0.9084	0.610739	nosig	40S ribosomal protein S15a (Fragment) OS=Homo sapiens OX=9606 PE=3 SV=2	--
H3BRV9	0	0	0.857	0	0	0.875	0.489	0.482	0	0.772	0	0.608	1.594	0	1.578	1.786	1.366	0.649	0.316	1.967	0.939	1.563	0.496	1.422	0.528	0.984	1.757	1.02	0	0.833	2.79223	0.0026573	up	Nuclear transport factor 2 (Fragment) OS=Homo sapiens OX=9606 GN=NUTF2 PE=1 SV=1	NUTF2
H3BTH8	0.633	1.961	0.206	0.364	0.204	0.248	0	0.308	1.803	0	0.866	0.665	0.955	0.671	0	1.265	0	1.938	0.31	3.116	0.906	3.437	0.489	0.258	0.384	1.941	0.296	0.48	1.574	0.188	1.72333	0.198705	nosig	Hyaluronan and proteoglycan link protein 3 OS=Homo sapiens OX=9606 GN=HAPLN3 PE=1 SV=1	HAPLN3
H3BTI0	0	1.406	0.693	1.291	0	0.971	0	0.802	7.732	0.816	0	0.589	0	0.833	0	1.132	0.861	0	0	0	0	0.433	0	1.418	0.526	0.956	0	0	0.643	1.013	0.306469	0.225652	nosig	Cysteine-rich secretory protein LCCL domain-containing 2 OS=Homo sapiens OX=9606 GN=CRISPLD2 PE=1 SV=1	CRISPLD2
H3BTN5	2.974	0.438	0.755	1.861	1.34	0.553	0.429	0.574	0.426	3.104	0.296	0.9	0.289	0.916	0.821	0.317	2.016	1.384	2.103	0.836	1.829	0.501	0.499	0.606	1.426	0.999	2.089	1.994	0.935	1.998	0.913522	0.772333	nosig	Pyruvate kinase (Fragment) OS=Homo sapiens OX=9606 GN=PKM PE=1 SV=1	PKM
H3BUU9	1.243	1.504	1.405	0.877	1.113	1.173	1.408	1.365	1.421	1.939	1.243	1.194	1.226	1.01	0.82	1.309	1.533	0.766	1.158	0.616	0.932	0.96	1.556	1.288	1.332	1.102	1.183	1.495	0.966	1.15	0.84916	0.0704711	nosig	Cadherin-11 OS=Homo sapiens OX=9606 GN=CDH11 PE=1 SV=1	CDH11
H7BXY5	0.368	0	0.452	1.289	0	0	0	0.535	0	0.469	0.504	0.249	0	0	0.654	0	0	0.35	0	3.484	0	1.984	0	1.413	0.638	0	0.932	0.56	0.577	0.207	1.85544	0.263831	nosig	Nexilin (Fragment) OS=Homo sapiens OX=9606 GN=NEXN PE=1 SV=1	NEXN
H7BY55	0.619	0.657	0.363	0.741	0.885	0.634	1.09	0.724	0.685	0.334	0.812	0.686	0.829	0.559	1.195	1.071	2.232	2.619	1.684	2.631	1.181	1.372	0.787	0.783	1.155	0.765	0.637	1.463	1.086	0.891	1.81506	0.00161354	up	Complement decay-accelerating factor OS=Homo sapiens OX=9606 GN=CD55 PE=1 SV=2	CD55
H7BYY1	1.443	1.301	1.913	1.534	0.934	2.285	1.34	1.354	1.733	1.095	0.736	0.854	0.985	0.834	0.663	1.039	0.667	0.684	1.171	1.908	0.43	1.325	1.485	0.584	0.611	1.113	2.039	0.755	0.571	1.045	0.652927	0.00395059	down	Tropomyosin 1 (Alpha), isoform CRA_m OS=Homo sapiens OX=9606 GN=TPM1 PE=1 SV=1	TPM1
H7BZA0	1.13	0.66	1.406	0.854	1.188	1.08	1.263	0.984	0.894	1.064	1.409	0.682	1.098	1.008	2.48	1.093	1.143	0.706	0.918	0.985	1.204	1.697	1.02	1.036	0.737	0.929	1.239	1.211	0.856	2.503	1.13817	0.277915	nosig	Neurobeachin-like protein 1 (Fragment) OS=Homo sapiens OX=9606 GN=NBEAL1 PE=1 SV=1	NBEAL1
H7C0L5	1.175	0.286	0.113	4.416	1.043	0.819	0.365	0.225	0.008	2.422	0.942	0.183	0.063	0.152	1.92	0.406	0.345	2.559	2.392	1.741	1.257	3.523	0.149	0.377	1.001	1.549	0.889	0.626	0.198	0.003	0.932441	0.882266	nosig	Inter-alpha-trypsin inhibitor heavy chain H4 (Fragment) OS=Homo sapiens OX=9606 GN=ITIH4 PE=1 SV=1	ITIH4
H7C0X5	0.383	0.437	0.403	0.741	2.139	0.414	0.645	0.547	0.455	0.945	1.194	1.441	0.999	0.643	1.693	1.028	1.046	3.335	0.928	1.543	1.055	1.484	0.299	1.254	0.81	0.67	0.876	1.103	1.211	2.145	1.74124	0.0265119	up	Probable serine carboxypeptidase CPVL (Fragment) OS=Homo sapiens OX=9606 GN=CPVL PE=1 SV=1	CPVL
H7C1H6	0	0	1.256	1.173	0	0	1.679	1.157	1.296	1.229	1.104	1.163	0	0.872	0	0	1.276	0	0.779	0.979	2.041	0.972	1.017	0	0	1.178	0.919	1.221	0.943	0	0.92837	0.829489	nosig	Exostosin-1 (Fragment) OS=Homo sapiens OX=9606 GN=EXT1 PE=1 SV=1	EXT1
H7C1X3	0.209	0.128	6.16	0.134	0.397	0.107	0.927	0.52	0	0.548	0.647	0.641	2.794	0.45	2.319	0	0.845	0.074	0.614	0.732	0.896	0.475	0.915	6.854	0	0.196	1.541	0.953	0.751	0.69	1.22601	0.765905	nosig	Serine/threonine-protein kinase PAK 2 (Fragment) OS=Homo sapiens OX=9606 GN=PAK2 PE=1 SV=1	PAK2
H7C2Y5	0.589	1.736	1.61	1.091	1.462	1.277	0.866	1.383	1.137	1.483	0.951	1.084	2.505	1.5	0.937	1.508	0.614	0.332	0.986	0.286	0.904	0	4.465	1.003	1.595	1.05	0	1.154	0.999	0.658	0.891681	0.580642	nosig	DnaJ_C domain-containing protein (Fragment) OS=Homo sapiens OX=9606 PE=1 SV=8	--
H7C3K2	0.993	1.234	1.66	1.309	1.169	1.172	1.205	1.504	1.51	1.834	1.228	1.352	1.341	0.98	0.602	1.266	0.889	0.575	1.597	0.298	1.183	1.127	1.212	0.766	1.723	1.313	1.157	1.428	1.571	1.622	0.854673	0.106803	nosig	Metabotropic glutamate receptor 7 OS=Homo sapiens OX=9606 GN=GRM7 PE=1 SV=1	GRM7
H7C3N6	2.336	1.279	0.976	1.211	1.366	1.302	1.137	0.799	0.636	0.972	1.722	0.75	1.597	0.687	1.242	0.859	1.514	1.848	1.111	0.708	1.983	0.383	1.1	0.902	1.667	0.823	1.136	0.815	1.302	1.214	0.972324	0.852351	nosig	Anoctamin (Fragment) OS=Homo sapiens OX=9606 GN=ANO10 PE=1 SV=1	ANO10
H7C4L0	0.843	1.211	0.626	1.196	0.977	0.907	0.787	0.678	1.061	0.783	0.895	1.458	1.118	0.92	2.091	0.955	1.35	1.798	1.891	2.097	0.75	0.686	0.934	0.685	0.711	1.079	0.688	0.977	1.392	1.003	1.29441	0.0387435	nosig	Nectin-3 (Fragment) OS=Homo sapiens OX=9606 GN=NECTIN3 PE=1 SV=8	NECTIN3
H7C5W9	0.769	0.511	0.609	0.67	0.533	0.539	0.548	0.62	0.769	0.823	0.724	0.908	0.654	0.806	3.02	0.705	1.068	2.138	1.367	1.292	0.595	1.641	3.188	1.318	0.776	0.716	0.732	2.18	1.3	0.917	2.03763	0.00114954	up	Endoplasmic reticulum class 1/2 Ca(2+) ATPase (Fragment) OS=Homo sapiens OX=9606 GN=ATP2A2 PE=1 SV=1	ATP2A2
H9KV28	1.178	2.028	1.61	1.1	1.412	1.157	1.156	1.128	1.312	0.978	1.324	1.536	1.379	1.624	0.795	1.556	1.573	0.399	1.675	0.357	1.094	0.554	1.773	0.98	1.433	1.064	1.026	1.212	0.841	1.868	0.921319	0.471256	nosig	Protein diaphanous homolog 1 OS=Homo sapiens OX=9606 GN=DIAPH1 PE=1 SV=2	DIAPH1
H9KV31	1.219	1.629	1.171	1.024	0.994	1.857	1.622	1.277	1.085	0.86	1.897	1.4	1.77	1.456	1.051	1.061	2.742	0.442	1.577	0.3	1.241	0.602	0.871	0.665	1.702	0.865	0.888	1.182	0.99	1.776	0.960826	0.765723	nosig	Neural cell adhesion molecule 2 OS=Homo sapiens OX=9606 GN=NCAM2 PE=1 SV=2	NCAM2
I3L145	0.464	0.998	0.575	1.556	0.83	0.389	0.392	0.354	0.656	1.699	1.548	1.048	1.812	1.8	0.454	1.473	0.685	0.716	1.75	0.293	1.969	2.467	0.794	1.04	0.942	1.187	2.865	1.273	2.056	1.314	1.73676	0.0121257	up	Sex hormone-binding globulin OS=Homo sapiens OX=9606 GN=SHBG PE=1 SV=1	SHBG
I3L2R6	0.721	0.571	1.416	0.978	0.486	1.152	0.682	1.127	0.583	0.877	0.266	1.482	0.783	0.702	1.815	1.188	0.672	0.929	0.556	3.038	0.822	1.571	0.711	1.739	0.471	0.705	1.848	1.56	0.702	0.983	1.31171	0.138639	nosig	Thioredoxin domain-containing protein 17 OS=Homo sapiens OX=9606 GN=TXNDC17 PE=1 SV=1	TXNDC17
I3L397	0.596	0.761	0.971	0.726	0.534	1.056	0.791	0.987	0.7	0.974	0.635	1.179	1.111	0.598	1.399	2.346	0.603	1.235	0.752	2.55	1.037	1.919	0.545	1.742	0.375	0.951	2.271	0.865	0.773	0.693	1.45621	0.0269948	up	Eukaryotic translation initiation factor 5A (Fragment) OS=Homo sapiens OX=9606 GN=EIF5A PE=1 SV=8	EIF5A
J3KMZ9	0.623	0.547	0.71	0.569	0.971	1.089	1.141	0.532	0.99	0.642	0.671	2.298	1.709	1.303	4.519	1.162	2.548	0.306	1.324	1.517	1.254	0.397	0.358	0.863	0.611	0.7	1.479	0.958	1.212	0.389	1.63668	0.0425789	up	Low-density lipoprotein receptor (Fragment) OS=Homo sapiens OX=9606 GN=LDLR PE=1 SV=1	LDLR
J3KN67	1.333	0.507	0.227	0.4	0.348	0.841	1.042	1.027	0.326	0.387	0	0.246	0	0.629	1.255	0.897	0.512	0.766	0.405	5.002	0.136	1.179	1.83	1.568	0.584	0.141	1.736	0.815	0.933	0	1.44719	0.308807	nosig	Tropomyosin alpha-3 chain OS=Homo sapiens OX=9606 GN=TPM3 PE=1 SV=1	TPM3
J3KNF4	1.406	1.198	1.219	0.746	1.823	1.791	2.068	1.531	1.258	0.913	1.938	1.079	1.325	1.619	0.642	0.936	1.603	0.219	1.262	0.182	1.901	0.558	1.39	1.294	1.631	1.06	1.065	1.338	1.124	1.514	0.848563	0.23087	nosig	Copper chaperone for superoxide dismutase OS=Homo sapiens OX=9606 GN=CCS PE=1 SV=1	CCS
J3KP74	0.887	2.236	1.372	0.484	1.094	1.393	2.125	1.098	2.174	0.837	1.163	2.121	1.182	1.352	1.65	1.629	1.859	0.657	0.685	0.532	0.851	0.834	0.866	0.743	0.723	1.176	0.882	0.865	1.639	1.232	0.826314	0.296093	nosig	Proteoglycan 4 (Fragment) OS=Homo sapiens OX=9606 GN=PRG4 PE=1 SV=8	PRG4
J3KPA1	1.054	2.117	1.112	1.807	0.575	1.006	1.188	0.857	1.503	1.57	1.239	0.584	1.057	1.377	0.967	1.426	0.778	1.718	1.274	1.396	0.722	1.387	0.935	0.691	1.093	0.662	1.111	1.152	1.154	0.587	0.833138	0.214363	nosig	Cysteine-rich secretory protein 3 OS=Homo sapiens OX=9606 GN=CRISP3 PE=1 SV=1	CRISP3
J3KPQ0	2.616	0.914	1.182	0.585	2.785	0	0.88	0.479	0	1.197	0.994	1.136	0.513	0.63	1.241	2.104	0.655	0	0.678	0.492	2.47	1.103	1.05	1.755	1.456	0.924	1.266	0.841	0.974	1.559	1.02656	0.933139	nosig	Fibroblast growth factor receptor OS=Homo sapiens OX=9606 GN=FGFR4 PE=1 SV=1	FGFR4
J3KPY9	1.989	0.324	1.751	1.133	1.056	2.215	0.781	1.327	1.085	1.429	2.561	0.383	0.914	0	0.313	0	0.757	2.061	0.455	0	0.601	1.626	1.286	0.195	1.572	0.758	0.951	1.586	2.702	0.745	0.743545	0.201989	nosig	Anthrax toxin receptor OS=Homo sapiens OX=9606 GN=ANTXR2 PE=1 SV=1	ANTXR2
J3KQ18	0.463	0.616	1.891	0.255	0.471	0.316	0.391	0.908	0.244	0.613	0.543	2.938	1.803	7.622	2.138	0.955	1.478	0.069	0.246	0.192	1.767	0.689	0.345	1.699	0	1.718	1.489	0	0.206	1.161	2.19342	0.0846438	nosig	D-dopachrome decarboxylase OS=Homo sapiens OX=9606 GN=DDT PE=1 SV=1	DDT
J3KQ26	0.834	0.672	0.651	0.485	0	0.391	0.344	0	0	0	0	0.992	1.175	0.141	2.979	0.121	0	0.333	1.039	2.573	1.035	0	0	1.456	1.409	1.14	0	1.26	0	0.633	2.41131	0.0386607	up	Armadillo repeat-containing protein 5 OS=Homo sapiens OX=9606 GN=ARMC5 PE=1 SV=1	ARMC5
J3KQ66	0.927	1.186	0.796	1.116	1.124	0.935	1.057	1.146	1.169	1.115	0.878	0.868	0.829	1.235	1.659	0.804	1.203	1.967	1.309	2.261	0.749	1.06	0.974	0.566	0.935	1.191	0.674	1.032	0.909	0.688	1.0307	0.760908	nosig	Reelin OS=Homo sapiens OX=9606 GN=RELN PE=1 SV=1	RELN
J3QQW1	0	1.282	0	0.352	0	1.279	0	1.714	0	1.121	1.044	1.149	1.243	1.277	0.625	1.352	1.644	0	0.782	0.458	1.53	0.866	0	1.806	0.904	1.357	1.532	0.874	2.163	1.167	1.89396	0.0585333	nosig	CD226 antigen (Fragment) OS=Homo sapiens OX=9606 GN=CD226 PE=1 SV=1	CD226
J3QQX6	1.165	1.033	0.546	1.507	0.735	0.711	0.548	0.906	0.941	1.049	1.294	0.858	1.173	1.058	0.987	1.506	0.919	2.236	1.239	1.62	1.624	1.705	0.981	1.347	0.926	0.863	0.712	1.234	0.798	0.622	1.29647	0.0473886	nosig	Intercellular adhesion molecule 2 (Fragment) OS=Homo sapiens OX=9606 GN=ICAM2 PE=1 SV=1	ICAM2
J3QRN2	1.411	1.506	1.564	0.248	0.913	1.211	1.339	1.458	1.603	1.236	1.123	1.085	1.634	1.256	0.874	1.587	1.265	0	0	0.257	2.131	0.647	1.269	1.922	0.912	1.329	1.599	0.774	1.466	1.144	0.891745	0.464418	nosig	Beta-2-glycoprotein 1 (Fragment) OS=Homo sapiens OX=9606 GN=APOH PE=1 SV=1	APOH
J3QRU8	0.83	0.689	1.169	0.117	1.625	0.965	1.351	0.83	0.691	0.672	1.108	1.129	3.554	0.92	0.313	1.253	1.354	0.038	1.049	1.373	4.062	0.569	1.184	1.916	0.636	1.055	1.283	1.064	1.361	1.456	1.49217	0.0889461	nosig	ARF GTPase-activating protein GIT1 OS=Homo sapiens OX=9606 GN=GIT1 PE=1 SV=1	GIT1
J3QTR3	1.017	1.335	0.977	2.44	1.108	1.604	0.768	0.512	0.713	2.11	1.285	1.6	1.287	1.853	1.256	0.893	1.86	0.772	0.95	0.313	1.205	0.579	0.73	1.315	1.467	1.382	1.814	1.745	0.726	0.68	0.942149	0.748513	nosig	Ubiquitin-40S ribosomal protein S27a (Fragment) OS=Homo sapiens OX=9606 GN=RPS27A PE=1 SV=1	RPS27A
K7ELL7	1	1.031	0.757	0.75	1.257	0.859	0.887	0.937	0.819	0.557	0.813	1.08	0.819	0.688	1.869	1.076	1.212	1.679	1.55	1.664	1.064	1.75	0.949	1.201	1.023	0.913	1.345	1.104	1.371	0.768	1.35182	0.00385915	up	Glucosidase 2 subunit beta OS=Homo sapiens OX=9606 GN=PRKCSH PE=1 SV=1	PRKCSH
K7ELW0	0.546	0.695	0.865	0.854	0.404	1.335	0.602	0.891	0.694	0.782	0.489	1.493	1.095	0.755	1.766	1.768	1.032	0.731	0.529	2.307	1.711	1.592	0.401	2.155	0.578	0.908	2.575	1.011	0.519	1.151	1.60185	0.0102037	up	Parkinson disease protein 7 OS=Homo sapiens OX=9606 GN=PARK7 PE=1 SV=1	PARK7
K7ENJ4	1.572	1.557	0.798	1.525	3.299	1.123	0.991	1.501	0.922	1	1.113	1.111	1.609	0.967	0.706	0.935	1.599	0.976	1.09	0.488	1.232	0.636	2.122	0.811	1.639	1.058	1.045	0.87	1.41	0.961	0.783105	0.228872	nosig	ATP synthase subunit alpha, mitochondrial (Fragment) OS=Homo sapiens OX=9606 GN=ATP5F1A PE=1 SV=1	ATP5F1A
K7EPJ4	0.608	0.56	0.148	0.779	0.901	0.632	0.607	0.392	0.382	0.905	0.753	0.312	0.899	1.067	1.05	0.358	1.858	2.552	0.701	1.052	1.003	1.447	2.172	2.947	1.922	0.977	2.745	1.07	1.371	1.006	2.30487	0.000331853	up	Cartilage intermediate layer protein 2 OS=Homo sapiens OX=9606 GN=CILP2 PE=1 SV=1	CILP2
K7EPV6	1.074	0	1.701	1.393	0.697	1.054	1.203	1.329	1.23	0.822	0	1.139	0	1.128	0.88	0	0	0.363	1.664	1.077	0.781	2.134	1.095	1.195	0.361	0	0.747	1.706	1.621	0.853	0.797106	0.314886	nosig	Choline transporter-like protein 2 (Fragment) OS=Homo sapiens OX=9606 GN=SLC44A2 PE=1 SV=1	SLC44A2
K7EQL4	1.322	1.625	1.507	1.327	1.563	1.455	1.768	1.193	1.901	1.788	1.159	0.98	1.086	0.883	0.799	0.755	1.349	0.226	1.487	0.264	1.557	0.852	1.783	0.954	1.368	1.198	1.362	1.442	0.979	1.464	0.710305	0.000634133	down	Troponin T, slow skeletal muscle (Fragment) OS=Homo sapiens OX=9606 GN=TNNT1 PE=1 SV=1	TNNT1
K7ER74	1.222	1.982	1.405	1.134	1.018	2.169	1.62	1.558	1.117	0.847	1.874	1.515	1.546	1.349	0.898	0.803	3.556	0.172	1.511	0.104	1.182	0.328	1.221	0.596	1.636	0.719	0.969	1.247	1.05	1.739	0.85329	0.346858	nosig	Apolipoprotein C-II OS=Homo sapiens OX=9606 GN=APOC4-APOC2 PE=1 SV=1	APOC4-APOC2
M0QZQ3	0.491	1.489	1.543	0.502	1.601	1.41	5.044	1.624	1.643	0.599	1.386	1.128	1.121	0.948	0.297	1.069	1.35	0.23	1.358	0.093	0.969	0.394	1.364	1.715	1.397	1.515	2.117	1.325	1.171	1.223	0.695159	0.282164	nosig	Spectrin beta chain OS=Homo sapiens OX=9606 GN=SPTBN4 PE=1 SV=1	SPTBN4
M0R0P0	1.252	0	1.648	0.043	1.325	1.4	0.684	0.881	0	1.111	0	1.064	0.987	1.072	1.595	1.077	1.556	1.269	1.539	1.214	0.218	1.558	0.943	0	1.2	1.254	1.351	1.133	0.995	0.677	1.24053	0.386417	nosig	CD209 antigen OS=Homo sapiens OX=9606 GN=CD209 PE=1 SV=1	CD209
M0R1Q1	1.262	1.48	2.039	0	1.453	1.001	1.348	1.448	1.622	0	1.202	1.323	0	0	0	1.376	1.346	0	0.886	0	0.897	0	0	1.533	0.985	0	0	0.914	1.292	0	0.504334	0.035723	down	Complement C3 (Fragment) OS=Homo sapiens OX=9606 GN=C3 PE=1 SV=1	C3
O00151	1.162	1.011	1.139	1.387	0.944	0.709	0.773	0.838	0.588	0.628	0.465	1.5	0.708	0.658	0.978	1.04	0.86	1.19	0.921	3.085	0.964	2.528	0.554	1.387	0.448	0.553	1.585	0.665	0.954	0.794	1.18951	0.320194	nosig	PDZ and LIM domain protein 1 OS=Homo sapiens OX=9606 GN=PDLIM1 PE=1 SV=4	PDLIM1
O00187	1.097	1.236	1.544	0.818	1.157	1.685	1.403	1.542	1.536	1.017	1.224	1.387	0.96	1.232	0.872	1.134	1.377	0.553	1.005	0.598	1.63	0.725	1.486	1.332	1.468	1.398	1.46	0.876	1.297	1.377	0.897238	0.25069	nosig	Mannan-binding lectin serine protease 2 OS=Homo sapiens OX=9606 GN=MASP2 PE=1 SV=4	MASP2
O00194	0.966	0.782	1.375	1.368	0.495	0.626	0.634	0.553	0.575	0.664	0.768	2.785	0.048	0.471	0.63	0.288	0.234	0.208	0.855	5.69	0.318	2.512	0.488	1.563	0.467	0.364	0.658	0.607	0.694	0.268	1.23887	0.545857	nosig	Ras-related protein Rab-27B OS=Homo sapiens OX=9606 GN=RAB27B PE=1 SV=4	RAB27B
O00241	1.57	1.012	1.258	1.049	0.708	1.652	0	0.701	0	0.798	1.353	0.622	1.189	0.567	1.558	0.758	1.001	1.212	1.371	1.889	0.76	2.496	0.422	0.492	1.295	0.394	1.254	0.981	0.638	0	1.15752	0.540112	nosig	Signal-regulatory protein beta-1 OS=Homo sapiens OX=9606 GN=SIRPB1 PE=1 SV=5	SIRPB1
O00264	1.787	1.961	2.072	0	1.412	1.133	1.308	1.548	2.048	0	1.081	0.513	0.498	1.466	1.367	0.425	1.222	0.42	2.037	0	0.596	1.266	1.541	0	1.404	0.6	0.501	1.92	1.507	0.584	0.713995	0.192542	nosig	Membrane-associated progesterone receptor component 1 OS=Homo sapiens OX=9606 GN=PGRMC1 PE=1 SV=3	PGRMC1
O00299	0.467	0.696	0.918	1.019	0.602	0.918	0.721	3.164	1.796	0.491	0.134	0.763	1.133	0.569	1.402	2.317	0.19	0.288	0.666	2.66	0.814	0.792	0.585	2.259	0.174	0.294	3.886	1.597	0.424	0.803	1.00769	0.980933	nosig	Chloride intracellular channel protein 1 OS=Homo sapiens OX=9606 GN=CLIC1 PE=1 SV=4	CLIC1
O00391	0.737	0.74	0.814	0.719	0.657	0.756	0.807	0.764	0.708	0.621	0.905	1.179	0.827	0.852	1.665	1.032	1.293	2.059	0.972	3.095	1.124	1.023	0.947	1.071	0.808	0.87	0.732	0.884	1.29	0.822	1.60112	0.00218504	up	Sulfhydryl oxidase 1 OS=Homo sapiens OX=9606 GN=QSOX1 PE=1 SV=3	QSOX1
O00462	0.591	1.696	0.775	1.238	0.923	0.89	0.842	0.832	0.974	1.517	0.835	1.532	1.076	1.334	1.533	0.579	1.908	2.141	1.05	0.827	0.718	1.26	1.188	0.941	1.857	0.898	1.398	0.827	0.998	1.143	1.16963	0.241816	nosig	Beta-mannosidase OS=Homo sapiens OX=9606 GN=MANBA PE=1 SV=3	MANBA
O00468	0.405	0.483	0.098	0.399	0.241	0.224	0.763	0.127	0.535	0.23	0.799	1.25	0.284	0.426	7.605	0.47	0.427	1.101	0.388	5.041	0.324	0.51	0.175	0.21	0.584	0.709	0	0.095	0.571	0.323	3.03738	0.10736	nosig	Agrin OS=Homo sapiens OX=9606 GN=AGRN PE=1 SV=6	AGRN
O00533	0.868	0.933	0.652	1.14	0.752	1.009	0.928	1.178	0.749	0.995	1.073	0.775	0.88	0.964	0.622	0.72	0.8	3.102	1.035	2.117	0.898	1.752	0.981	0.958	1.132	1.028	0.73	1.035	1.108	0.851	1.22561	0.1515	nosig	Neural cell adhesion molecule L1-like protein OS=Homo sapiens OX=9606 GN=CHL1 PE=1 SV=4	CHL1
O00592	0.598	1.306	1.026	0.908	0.532	0.788	0.973	1.226	0.75	0.881	0.861	0.466	0.52	0.469	1.043	0.62	0.669	3.428	0.89	2.251	0.587	3.215	0.965	0.906	0.895	0.912	0.667	0.828	0.899	0.521	1.20227	0.387754	nosig	Podocalyxin OS=Homo sapiens OX=9606 GN=PODXL PE=1 SV=2	PODXL
O00602	0.701	1.124	1.206	1.512	0.711	0.622	1.119	1.212	1.358	1.065	0.646	0.458	1.482	0.574	0.499	1.27	0.79	1.487	0.839	1.453	0.688	0.608	1.435	0.89	2.157	1.154	1.757	3.045	1.189	1.287	1.11515	0.477758	nosig	Ficolin-1 OS=Homo sapiens OX=9606 GN=FCN1 PE=1 SV=2	FCN1
O00754	0.291	0.287	0.627	0.294	0.383	0.419	0.43	0.405	0.446	0.292	0.691	1.982	0.804	1.469	1.002	0.531	0.21	0.673	1.024	1.522	1.577	1.114	0.519	12.483	0.279	0.282	0.312	0.445	1.721	0.254	3.72922	0.0912774	nosig	Lysosomal alpha-mannosidase OS=Homo sapiens OX=9606 GN=MAN2B1 PE=1 SV=3	MAN2B1
O14498	0.796	0.446	0.788	0.733	0.829	1.118	0.8	0.95	0.799	0.661	1.301	1.189	1.087	0.935	1.159	1.396	1.101	1.72	1.073	1.948	1.605	1.533	1.177	1.109	0.668	0.761	0.796	1.336	1.869	1.005	1.56364	7.72E-05	up	Immunoglobulin superfamily containing leucine-rich repeat protein OS=Homo sapiens OX=9606 GN=ISLR PE=2 SV=1	ISLR
O14594	0	1.33	1.436	0.625	1.164	0.646	0.885	0.73	0.885	0	1.678	0.512	0.754	1.117	1.291	0.428	0.696	0.522	0.448	0.66	3.899	1.551	0.568	3.14	1.671	0.594	1.101	2.356	0	0.561	1.52883	0.141676	nosig	Neurocan core protein OS=Homo sapiens OX=9606 GN=NCAN PE=1 SV=3	NCAN
O14745	1.034	1.421	1.183	1.326	1.528	1.481	1.93	1.054	1.216	0.656	1.623	1.37	1.865	1.481	1.146	1.238	1.472	0.731	0.963	0.234	1.12	0.459	1.608	1.226	1.078	0.954	1.121	0.988	1.648	1.791	0.939902	0.598084	nosig	Na(+)/H(+) exchange regulatory cofactor NHE-RF1 OS=Homo sapiens OX=9606 GN=SLC9A3R1 PE=1 SV=4	SLC9A3R1
O14791	1.1	1.741	0.848	0.998	1.043	1.399	1.073	1.158	1.027	0.991	1.225	1.775	1.243	1.858	1.098	0.941	2.792	0.364	1.471	0.101	0.933	0.475	2.122	1.231	1.264	1.345	1.84	1.063	1.329	1.414	1.13746	0.334008	nosig	Apolipoprotein L1 OS=Homo sapiens OX=9606 GN=APOL1 PE=1 SV=5	APOL1
O14818	0	0.168	0.668	0	0	0.262	0.198	0.594	0	0.303	0.119	1.684	1.096	4.304	9.496	0.281	0.164	0.876	0.281	0.482	0.326	0.997	0.16	0	0.196	0.586	1.267	0.266	0.115	0.25	5.23165	0.0756378	nosig	Proteasome subunit alpha type-7 OS=Homo sapiens OX=9606 GN=PSMA7 PE=1 SV=1	PSMA7
O14983	2.815	1.898	1.048	1.334	1.858	1.673	2.138	1.539	1.245	1.349	1.376	1.115	1.453	0.935	1.094	0.832	1.175	0.394	1.689	0.177	1.453	0.042	1.14	0.84	1.223	1.294	1.189	1.108	0.83	1.494	0.617062	0.00378699	down	Sarcoplasmic/endoplasmic reticulum calcium ATPase 1 OS=Homo sapiens OX=9606 GN=ATP2A1 PE=1 SV=1	ATP2A1
O15031	1.773	0.68	0.638	1.162	0.929	0.54	0.537	0.695	0.797	0.538	0.783	1.007	1.406	1.569	1.639	1.488	0.93	1.461	1.662	1.951	0.787	1.55	1.01	0.633	0.822	1.044	1.474	1.501	0.791	0.773	1.46465	0.0193957	up	Plexin-B2 OS=Homo sapiens OX=9606 GN=PLXNB2 PE=1 SV=3	PLXNB2
O15067	1.597	1.49	1.821	1.025	2.087	1.402	1.756	1.787	1.874	1.484	1.226	1.444	0.906	1.243	1.351	1.364	1.348	0.156	1.229	0.179	0.953	0.697	1.066	1.295	0.772	1.21	1.406	0.797	1.129	1.305	0.645592	0.000144521	down	Phosphoribosylformylglycinamidine synthase OS=Homo sapiens OX=9606 GN=PFAS PE=1 SV=4	PFAS
O15117	0.654	0.735	0.522	1.081	0	0.682	0.588	0.328	0.931	1.585	1.217	0.873	1.002	0	0.501	0.565	1.167	2.686	1.299	2.466	1.047	0.887	0	1.242	0	0.925	0.835	0	1.002	0.763	1.3001	0.317464	nosig	FYN-binding protein 1 OS=Homo sapiens OX=9606 GN=FYB1 PE=1 SV=2	FYB1
O15143	1.041	0.716	2.266	0.925	0.598	0.835	0.367	2.091	0.666	0.839	0.099	0.618	0.843	1.256	1.741	0.823	0.294	1.471	0.7	2.333	0.752	0.858	1.061	0.906	0.496	0.595	3.822	1.391	0.613	1.108	1.05278	0.842448	nosig	Actin-related protein 2/3 complex subunit 1B OS=Homo sapiens OX=9606 GN=ARPC1B PE=1 SV=3	ARPC1B
O15144	0.896	1.888	3	0.811	0.43	1.092	1.9	0.592	0.705	0.806	0.136	0.355	0.468	1.499	1.793	2.579	0.458	0.83	0.604	1.695	0.631	0.607	0.147	0.792	0.102	0.088	5.89	1.251	0.653	0.939	0.887665	0.728044	nosig	Actin-related protein 2/3 complex subunit 2 OS=Homo sapiens OX=9606 GN=ARPC2 PE=1 SV=1	ARPC2
O15145	0.509	0.361	1.524	1.461	0	0.767	1.229	0.771	0.903	1.335	0	0.429	0	2.275	1.135	0.727	1.052	0.702	0.434	1.308	1.332	0.893	0	1.055	0.77	0.98	2.828	1.033	1.533	1.904	1.15068	0.564148	nosig	Actin-related protein 2/3 complex subunit 3 OS=Homo sapiens OX=9606 GN=ARPC3 PE=1 SV=3	ARPC3
O15204	0.409	0.366	0.491	0	0.361	0.497	0.476	0.088	1.129	0.441	1.034	1.266	0.49	1.307	1.139	1.06	1.184	1.578	1.724	2.086	1.427	1.964	1.291	1.616	1.185	1.099	1.277	1.407	1.762	0.59	3.11015	4.58E-07	up	ADAM DEC1 OS=Homo sapiens OX=9606 GN=ADAMDEC1 PE=1 SV=2	ADAMDEC1
O15212	0	0	0	0.263	0.335	0.265	0.375	0	0.278	0	0.278	0.288	0.275	7.961	1.556	0	0.2	0	0.337	0.479	0.339	0	0.264	0.252	0	0	0.22	6.639	0.818	0	6.5653	0.103466	nosig	Prefoldin subunit 6 OS=Homo sapiens OX=9606 GN=PFDN6 PE=1 SV=1	PFDN6
O15230	0.714	0.708	0.612	1.549	0.877	0.626	0.779	0.875	0.906	1.204	1.038	1.289	1.025	1.151	1.488	1.431	1.365	2.136	1.01	1.747	1.158	0.767	1.55	0.57	1.123	1.279	0.742	0.957	1.337	0.983	1.36418	0.0151205	up	Laminin subunit alpha-5 OS=Homo sapiens OX=9606 GN=LAMA5 PE=1 SV=8	LAMA5
O15335	1.371	0.252	0.507	1.326	3.041	0.493	0	0.373	0.259	1.044	1.414	0.961	0.853	1.105	0.54	0.244	1.501	0.414	0.249	0.684	1.036	0.934	2.544	3.923	2.177	0.88	1.278	1.371	1.874	1.953	1.49637	0.228755	nosig	Chondroadherin OS=Homo sapiens OX=9606 GN=CHAD PE=1 SV=2	CHAD
O15389	1.424	0	0.667	0.635	0.702	0	0	2.962	0.544	0.509	0	1.033	0	0.53	0.422	6.884	0.895	1.184	0	0.468	0	1.663	0.345	1.076	0.356	0.825	0.27	1.05	0	0.816	1.1969	0.739631	nosig	Sialic acid-binding Ig-like lectin 5 OS=Homo sapiens OX=9606 GN=SIGLEC5 PE=1 SV=1	SIGLEC5
O15467	3.692	2.862	3.801	1.467	0.874	2.174	2.716	1.208	0.98	0.777	1.318	0.267	4.05	0.5	2.05	0.623	0.616	0.089	0.631	0.63	0.62	0.204	1.002	0.462	0.652	0.445	0	0.597	0.398	0.683	0.38531	0.00868532	down	C-C motif chemokine 16 OS=Homo sapiens OX=9606 GN=CCL16 PE=1 SV=1	CCL16
O15511	0	0	0.879	0.356	0	1.279	0.66	1.304	0	0.306	0	0	0	1.411	1.183	0	0	0.721	0	1.71	0	1.196	0	1.016	0	0.458	2.514	0.629	0.355	1.164	1.29149	0.554081	nosig	Actin-related protein 2/3 complex subunit 5 OS=Homo sapiens OX=9606 GN=ARPC5 PE=1 SV=3	ARPC5
O15534	1.3	1.709	1.451	1.684	1.587	1.65	1.526	1.372	1.543	1.622	1.697	1.212	1.224	1.653	0.908	1.153	1.54	0.361	1.242	0.189	0.9	0.558	1.291	0.697	1.238	1.127	1.127	1.37	1.427	1.124	0.713481	0.000143151	down	Period circadian protein homolog 1 OS=Homo sapiens OX=9606 GN=PER1 PE=1 SV=2	PER1
O43157	1.054	0.578	0.868	0.774	0.677	0.236	1.032	0.996	0.487	0.876	1.445	0.955	1.004	1.07	0.502	1.611	0.775	1.253	0.821	1.866	1.447	2.643	1.18	1.439	1.488	1.046	0.848	1.251	1.653	0.999	1.66904	0.000787587	up	Plexin-B1 OS=Homo sapiens OX=9606 GN=PLXNB1 PE=1 SV=3	PLXNB1
O43240	0.759	0	0.727	0.68	1.967	0.539	1.188	1.114	0.246	0.6	0.31	0.983	1.028	1.078	0.829	0.524	1.214	0.393	0.84	0.926	3.91	1.633	1.511	3.421	0.588	2.21	1.187	1.163	0.456	1.512	1.64425	0.0749624	nosig	Kallikrein-10 OS=Homo sapiens OX=9606 GN=KLK10 PE=1 SV=3	KLK10
O43264	1.14	1.948	1.482	1.773	1.733	1.719	1.964	1.492	1.789	1.761	0.892	0.837	1.134	0.996	0.564	0.841	1.343	0.573	0.953	0.199	1.204	0.781	2.3	0.878	1.398	0.836	1.19	1.112	0.831	1.953	0.619457	3.70E-05	down	Centromere/kinetochore protein zw10 homolog OS=Homo sapiens OX=9606 GN=ZW10 PE=1 SV=3	ZW10
O43278	1.038	1.287	1.43	1.46	0.984	1.269	1.333	1.32	0.758	1.559	1.285	0.804	0.959	1.316	1.246	0.773	0.998	0.892	1.308	1.5	0.755	0.876	1.098	1.043	1.696	1.052	0.838	1.472	1.057	1.179	0.890296	0.177383	nosig	Kunitz-type protease inhibitor 1 OS=Homo sapiens OX=9606 GN=SPINT1 PE=1 SV=2	SPINT1
O43280	0.578	0	0	0	0.545	0.644	0.882	0.707	0	0	1.29	0	6.875	1.666	0.404	1.331	1.342	0	0	0.575	0.483	1.151	0.563	0.854	1.305	0.929	0.744	1.722	1.217	0.721	3.45232	0.0247264	up	Trehalase OS=Homo sapiens OX=9606 GN=TREH PE=1 SV=2	TREH
O43432	1.316	0.39	0.362	0.384	0.594	0.444	0.603	0.752	0	0.456	0.799	0.85	0.683	0.548	4.206	1.319	0.336	4.135	0.368	1.865	1.03	0.543	1.465	1.201	0.548	0.426	0.62	0.985	0.882	0.628	2.21062	0.0243629	up	Eukaryotic translation initiation factor 4 gamma 3 OS=Homo sapiens OX=9606 GN=EIF4G3 PE=1 SV=2	EIF4G3
O43493	1.619	0.694	0.409	0.669	0.804	0.649	0.838	0.694	0.599	0.499	1.895	1.234	0.703	0.607	0.272	1.339	1.468	2.251	1.156	1.818	2.332	0.771	0.515	1.812	0	0.913	1.608	1.601	1.175	0.759	1.62089	0.0145626	up	Trans-Golgi network integral membrane protein 2 OS=Homo sapiens OX=9606 GN=TGOLN2 PE=1 SV=4	TGOLN2
O43505	0.874	1.675	1.78	1.248	3.01	1.816	0.935	0.851	0.978	1.661	1.755	0.686	1.654	0.739	0.61	0.798	1.941	0.876	0.626	1.067	0.735	1.305	2.233	0.687	0.777	0.885	0.642	0.623	0.666	1.891	0.714729	0.100324	nosig	Beta-1,4-glucuronyltransferase 1 OS=Homo sapiens OX=9606 GN=B4GAT1 PE=1 SV=1	B4GAT1
O43660	1.904	1.944	1.407	1.986	1.109	1.183	2.911	1.658	2.145	1.175	1.418	1.792	1.206	1.402	1.141	0.638	0.477	0.744	0.703	0.255	0.68	0.571	1.162	0.758	1.624	1.219	0.592	1.001	1.442	0.918	0.566611	0.00198884	down	Pleiotropic regulator 1 OS=Homo sapiens OX=9606 GN=PLRG1 PE=1 SV=1	PLRG1
O43681	0.777	1.407	1.907	0.888	0	1.136	1.064	0	0.763	0	0.773	0.554	0	0	1.035	2.481	0.878	0	0.761	0.546	0.747	1.512	0	1.219	0.435	0.876	3.011	1.604	0	1.414	1.12352	0.723174	nosig	ATPase GET3 OS=Homo sapiens OX=9606 GN=GET3 PE=1 SV=2	GET3
O43707	0.672	1.592	0	0.597	0	0	0.721	0	0	0.441	0.713	0	0.764	0.784	0.73	0	0.663	0.27	0.692	4.65	0.599	0.323	0.623	0.441	0	0.912	0.442	0	0	0	1.56674	0.418369	nosig	Alpha-actinin-4 OS=Homo sapiens OX=9606 GN=ACTN4 PE=1 SV=2	ACTN4
O43790	0.099	0.101	0.064	0.15	0.07	0.179	0.146	0.182	0.127	0.16	12.786	0.076	0.094	0.121	15.464	0.138	0.083	0.089	0.117	0.051	0.083	0.046	0.1	0.08	0.125	0.113	0.116	0.142	0.153	0.107	11.77	0.172152	nosig	Keratin, type II cuticular Hb6 OS=Homo sapiens OX=9606 GN=KRT86 PE=1 SV=1	KRT86
O43852	1.284	2.421	2.297	0.849	0.781	0.905	1.051	1.509	2.332	0.318	0.383	1.087	0.526	1.792	0.969	0.9	0.854	0.785	2.306	1.168	1.078	0.723	1.382	0.752	0.794	0.528	0.735	0.771	2.871	1.272	0.78839	0.301275	nosig	Calumenin OS=Homo sapiens OX=9606 GN=CALU PE=1 SV=2	CALU
O43865	1.41	1.414	1.388	1.273	1.412	1.33	1.95	1.201	1.923	1.101	1.462	1.363	1.349	1.45	0.665	1.428	1.307	0.395	1.469	0.446	1.125	1.001	1.092	1.18	1.607	0.991	1.064	0.985	0.836	1.314	0.782148	0.0136774	nosig	S-adenosylhomocysteine hydrolase-like protein 1 OS=Homo sapiens OX=9606 GN=AHCYL1 PE=1 SV=2	AHCYL1
O43866	1.217	0.756	0.665	0.627	0.477	0.422	0.678	1.002	0.469	0.422	1.128	2.5	1.363	0.786	0.274	3.275	1.233	3.398	1.234	0.828	0.826	0.89	1.279	2.212	0.955	0.698	1.052	1.143	1.009	0.768	1.99339	0.00324208	up	CD5 antigen-like OS=Homo sapiens OX=9606 GN=CD5L PE=1 SV=1	CD5L
O43895	0	1.714	0.465	0.815	0	0	0.734	0.369	0.56	0	0	3.695	0.275	2.05	0.255	0.532	0.267	1.087	0.373	0.951	0.495	1.315	0.194	0	2.252	0.719	2.029	1.17	2.505	2.212	2.4024	0.0298788	up	Xaa-Pro aminopeptidase 2 OS=Homo sapiens OX=9606 GN=XPNPEP2 PE=1 SV=3	XPNPEP2
O60234	0	0.395	0.635	0.472	0.416	1.077	0	1.275	0	0	0	1.793	0	0	0.931	0	0	0	0	1.496	1.075	0.318	0	0.462	0	0.398	4.619	0.838	0.213	1.758	1.62775	0.360375	nosig	Glia maturation factor gamma OS=Homo sapiens OX=9606 GN=GMFG PE=1 SV=1	GMFG
O60449	0.385	0.547	0.698	0.433	0.62	0.474	0	0.392	0.54	0.316	1.23	1.032	0.644	0	0.358	2.673	0.391	3.668	1.287	3.226	0.449	3.698	0.494	0.336	0.316	0.345	0.468	0.311	0.333	0.636	2.48524	0.0268001	up	Lymphocyte antigen 75 OS=Homo sapiens OX=9606 GN=LY75 PE=1 SV=3	LY75
O60462	0.84	0.663	0.762	1.052	0.918	0.713	1.317	0.687	0.594	0.922	0.948	0.744	0.909	0.792	1.381	0.943	0.993	1.37	1.067	2.413	2.007	1.067	0.857	1.177	0.775	1.641	1.171	1.876	0.857	0.768	1.40269	0.0105854	up	Neuropilin-2 OS=Homo sapiens OX=9606 GN=NRP2 PE=1 SV=3	NRP2
O60844	1.631	0.797	1.394	0.639	0.684	1.269	0.79	1.491	0.981	0.238	0.937	1.11	0.903	1.551	1.317	0.824	1.202	1.337	0.963	2.086	0.988	1.201	1.42	1.136	1.07	1.273	0.661	0.859	1.206	1.099	1.16719	0.306577	nosig	Zymogen granule membrane protein 16 OS=Homo sapiens OX=9606 GN=ZG16 PE=1 SV=2	ZG16
O75051	0.181	0.916	1.067	0	1.636	0.96	0.753	1.137	0.618	2.083	1.427	0.955	0	1.469	1.041	1.133	1.478	0	0.662	1.346	1.724	1.69	1.113	0.89	1.752	0.663	1.499	1.089	1.413	0.495	1.16774	0.50052	nosig	Plexin-A2 OS=Homo sapiens OX=9606 GN=PLXNA2 PE=1 SV=4	PLXNA2
O75083	0.425	0.458	1.152	0.951	0.409	0.948	2.075	1.085	0.621	2.122	1.891	0.764	0.573	1.1	0.543	0.496	0.698	0.277	0.502	2.403	0.598	1.328	1.942	0.996	0.481	0.934	2.92	1.903	2.001	0.856	1.13244	0.607962	nosig	WD repeat-containing protein 1 OS=Homo sapiens OX=9606 GN=WDR1 PE=1 SV=4	WDR1
O75144	0.94	1.202	1.382	0.717	1.185	0.769	1.459	1.396	0.964	0.747	1.45	1.427	1.459	1.368	1.182	0.923	1.53	0.54	1.281	1.349	1.268	1.176	1.163	1.51	1.289	1.262	0.504	1.367	1.275	0.783	1.12006	0.262852	nosig	ICOS ligand OS=Homo sapiens OX=9606 GN=ICOSLG PE=1 SV=2	ICOSLG
O75223	0.982	1.3	1.01	0	1.039	0	1.102	1.528	3.095	1.015	0	0.796	0	1.054	1.941	1.003	0	0.733	0	0.681	0.893	1.197	0	0.694	0	1.584	0.941	0.724	0	0.653	0.582332	0.147849	nosig	Gamma-glutamylcyclotransferase OS=Homo sapiens OX=9606 GN=GGCT PE=1 SV=1	GGCT
O75326	0.492	1.166	1.325	0.825	1.148	1.167	1.806	0.735	1.91	1.083	1.14	1.577	1.152	1.112	1.371	1.149	0.802	1.601	0.951	0.839	1.232	1.549	1.175	1.039	0.986	1.311	0.603	1.129	1.038	1.322	0.989877	0.93898	nosig	Semaphorin-7A OS=Homo sapiens OX=9606 GN=SEMA7A PE=1 SV=1	SEMA7A
O75339	0.822	0.829	0.895	0.479	0.74	1.21	0.923	0.782	0.951	0.988	0.954	0.691	0.646	0.534	3.089	0.921	1.485	0.848	1.026	3.023	0.74	0.999	1.348	0.754	1.039	1.212	0.879	0.719	0.74	1.149	1.32243	0.109241	nosig	Cartilage intermediate layer protein 1 OS=Homo sapiens OX=9606 GN=CILP PE=1 SV=4	CILP
O75368	0.284	0.799	0.596	1.11	0	0.598	0.746	0.64	0.693	0.37	0.068	0.535	0.437	0	1.203	0.515	0.123	1.012	0.152	3.615	1.261	2.812	0	2.835	0.078	0.111	3.28	1.434	0.246	0.174	1.70416	0.160491	nosig	SH3 domain-binding glutamic acid-rich-like protein OS=Homo sapiens OX=9606 GN=SH3BGRL PE=1 SV=1	SH3BGRL
O75563	0.776	1.574	1.215	1.445	1.652	0.999	1.857	1.072	0.266	1.083	1.324	1.305	0.997	1.289	0.569	0	1.648	0.525	0.977	1.6	1.363	0.733	1.946	0.927	1.487	0.741	0.839	1.084	1.26	1.373	0.920806	0.604156	nosig	Src kinase-associated phosphoprotein 2 OS=Homo sapiens OX=9606 GN=SKAP2 PE=1 SV=1	SKAP2
O75594	0.783	0.261	0.162	0.976	0.406	0.786	0.683	0.44	0.797	0.242	0.156	2.877	1.316	0.398	0.794	2.913	1.156	1.008	1.312	2.346	2.422	0.711	0.836	2.362	0.954	1.097	0.693	0.9	1.019	1.847	2.44915	0.000535028	up	Peptidoglycan recognition protein 1 OS=Homo sapiens OX=9606 GN=PGLYRP1 PE=1 SV=1	PGLYRP1
O75636	1.513	1.117	1.634	0.67	1.238	1.789	1.092	1.743	1.377	0.182	1.076	0.984	1.166	1.284	1.003	1.154	0.915	1.059	0.632	1.404	1.179	0.603	1.607	1.226	1.352	1.479	1.316	0.376	1.342	1.364	0.911412	0.540107	nosig	Ficolin-3 OS=Homo sapiens OX=9606 GN=FCN3 PE=1 SV=2	FCN3
O75791	0.609	0.605	0.916	0.367	0.419	0.638	0.773	0.917	0.201	0.479	0.766	0.877	1.157	4.429	3.422	1.541	1.3	0.2	0.976	1.657	1.506	0.799	0.851	1.45	0.741	0.841	1.532	1.145	0.585	1.39	2.29279	0.00280971	up	GRB2-related adapter protein 2 OS=Homo sapiens OX=9606 GN=GRAP2 PE=1 SV=1	GRAP2
O75874	0.503	0.244	0.237	0.895	1.065	0.364	0.215	0.507	0.643	0.789	0.287	1.668	0.297	7.224	4.771	0.506	0.674	1.313	1.13	2.284	0.578	0.741	0.395	0.247	0.345	0.343	0.604	0.707	0.37	0.722	2.3074	0.0897413	nosig	Isocitrate dehydrogenase [NADP] cytoplasmic OS=Homo sapiens OX=9606 GN=IDH1 PE=1 SV=2	IDH1
O75882	1.139	1.28	1.207	1.36	1.382	1.222	1.115	1.371	1.211	1.145	1.087	1.008	1.332	1.132	0.816	0.862	1.258	1.436	1.099	0.812	1.066	0.9	1.077	0.924	1.511	1.327	1.406	1.312	1.196	1.366	0.922096	0.105253	nosig	Attractin OS=Homo sapiens OX=9606 GN=ATRN PE=1 SV=2	ATRN
O75976	0.907	0.426	0.48	1.067	0.565	0.428	0.402	0.588	0.315	3.559	0.596	0.543	0.633	1.277	1.327	0.592	0.895	1.854	1.086	2.656	0	1.72	0.506	1.48	1.143	1.163	0.673	0.81	1.823	0.633	1.22525	0.569596	nosig	Carboxypeptidase D OS=Homo sapiens OX=9606 GN=CPD PE=1 SV=2	CPD
O76061	0.578	0.393	0.288	0.613	0.546	1.028	0.377	1.012	0	0	0.299	1.301	0.458	1.079	4.096	1.692	1.119	1.589	0	2.207	1.59	1.119	1.691	0.672	1.112	0.464	0.175	1.38	0.207	0.269	2.32875	0.0117603	up	Stanniocalcin-2 OS=Homo sapiens OX=9606 GN=STC2 PE=1 SV=1	STC2
O76094	1.251	0	0.969	1.226	0.954	2.133	1.309	0	0.956	0.677	0	1.695	0.551	1.794	0.409	1.298	1.125	0.921	1.692	0.2	1.08	0	1.346	2.038	2.095	0.888	1.088	0.861	1.214	1.999	1.17646	0.506987	nosig	Signal recognition particle subunit SRP72 OS=Homo sapiens OX=9606 GN=SRP72 PE=1 SV=3	SRP72
O94856	3.882	0.749	0.478	1.301	0	0.524	0	0.734	0	0.841	0.985	1.024	0.888	0.359	2.305	1.195	0.225	2.054	0.629	1.877	1.072	1.033	0.783	0.317	0.762	0.691	0.781	0.894	0.862	0	1.10095	0.827528	nosig	Neurofascin OS=Homo sapiens OX=9606 GN=NFASC PE=1 SV=4	NFASC
O94919	1.781	1.718	1.368	0.904	1.663	1.945	1.855	1.991	1.276	0.897	1.403	0.904	0.96	1.592	0.456	0.664	1.922	0.312	1.119	0.259	1.162	0.407	0.936	0.915	1.998	1.239	1.134	1.256	1.193	2.528	0.726036	0.0298631	down	Endonuclease domain-containing 1 protein OS=Homo sapiens OX=9606 GN=ENDOD1 PE=1 SV=2	ENDOD1
O94923	2.585	2.685	1.803	0.887	0.903	0.815	3.18	1.945	2.731	0.834	1.068	1.703	1.546	0.697	0.364	0.73	0.765	0.975	0.542	1.047	1.771	0.465	0.736	0.511	0.92	0.84	0.61	0	0	0.385	0.426693	0.00584668	down	D-glucuronyl C5-epimerase OS=Homo sapiens OX=9606 GN=GLCE PE=1 SV=3	GLCE
O94985	1.291	0.885	0.726	1.457	1.105	0.855	0.796	0.852	0.761	1.251	1.19	0.977	1.126	0.89	2.287	1.101	0.936	2.165	1.404	1.294	1.161	1.272	0.836	0.935	1.185	0.932	0.592	0.818	1.072	1.021	1.16214	0.198987	nosig	Calsyntenin-1 OS=Homo sapiens OX=9606 GN=CLSTN1 PE=1 SV=1	CLSTN1
O95274	0.406	0.495	0.364	0.571	0	0	0.454	0	0.808	0.865	0.966	0.703	1.017	0.869	0	0.521	1.47	4.236	0.404	0.214	1.294	3.332	0.9	0.638	1.969	1.57	1.43	1.074	0.933	0.441	3.02561	0.00343827	up	Ly6/PLAUR domain-containing protein 3 OS=Homo sapiens OX=9606 GN=LYPD3 PE=1 SV=2	LYPD3
O95336	0.806	0.472	0.697	0.304	0.335	0.38	0.222	0.429	0.848	0.207	0	1.075	0	0	4.283	0	0	0.768	0.612	4.212	0	0	0.257	0.79	0	0.405	0.705	0.275	0.326	0.674	1.53	0.399652	nosig	6-phosphogluconolactonase OS=Homo sapiens OX=9606 GN=PGLS PE=1 SV=2	PGLS
O95428	0.628	0.298	0	0	0.551	0.237	0.931	0	0	0	0.759	0.362	0.941	0.705	1.886	1	0.119	2.784	0.894	2.35	1.718	0.735	0.388	2.435	0.386	1.09	0.732	0.642	0.953	0.99	4.13403	0.000249971	up	Papilin OS=Homo sapiens OX=9606 GN=PAPLN PE=2 SV=4	PAPLN
O95445	1.325	1.909	1.361	1.314	1.471	1.57	1.44	1.341	1.079	1.456	2.189	1.113	1.406	1.649	0.892	0.752	1.948	0.184	1.01	0.067	1.273	0.646	1.491	0.949	1.256	1.235	1.42	1.322	1.125	1.543	0.822585	0.0693128	nosig	Apolipoprotein M OS=Homo sapiens OX=9606 GN=APOM PE=1 SV=2	APOM
O95479	0.859	0.742	0.756	0.682	1.175	1.083	0.67	1.611	0.739	0.605	0.716	0.571	0.827	2.197	1.085	1.01	0.835	1.474	0.882	2.624	2.159	1.074	0.902	1.007	0.568	0.948	1.035	0.954	1.32	0.923	1.29517	0.107302	nosig	GDH/6PGL endoplasmic bifunctional protein OS=Homo sapiens OX=9606 GN=H6PD PE=1 SV=2	H6PD
O95497	0.486	0.955	1.366	0.394	1.585	0.288	1.421	0.998	0.843	1.114	0.349	1.803	2.068	2.287	0.743	1.186	0.347	2.109	0.828	0.454	0.911	0.971	1.851	0.847	2.89	0.525	0.374	0.607	1.388	3.406	1.3727	0.161821	nosig	Pantetheinase OS=Homo sapiens OX=9606 GN=VNN1 PE=1 SV=2	VNN1
O95810	0.194	2.192	0.702	0.204	0.171	0.051	0.144	0.135	0.659	0.238	0.23	0.087	1.33	0	5.385	0.103	0.655	2.352	0.349	3.461	0.544	1.808	1.136	1.145	0.287	1.537	1.021	0.123	0.406	0.131	2.35501	0.0911566	nosig	Caveolae-associated protein 2 OS=Homo sapiens OX=9606 GN=CAVIN2 PE=1 SV=3	CAVIN2
O95897	0.815	1.386	0.822	1.039	0.972	0.89	1.638	1.293	0.262	0	0.955	1.321	1.207	0.921	0.739	1.134	1.162	1.894	1.036	1.692	0.444	2.251	1.268	1.212	1.339	0.898	0.506	0.85	0.962	0.955	1.24745	0.236576	nosig	Noelin-2 OS=Homo sapiens OX=9606 GN=OLFM2 PE=1 SV=2	OLFM2
O95967	1.011	0.482	0.512	0.882	1.191	1.105	2.304	0.596	2.719	4.394	0.215	0.461	0.964	0.48	0.782	0.765	0.18	2.346	0.569	2.421	1.549	0.768	0.821	1.176	0.699	0.753	0.194	0.762	0.735	0.951	0.578804	0.155287	nosig	EGF-containing fibulin-like extracellular matrix protein 2 OS=Homo sapiens OX=9606 GN=EFEMP2 PE=1 SV=3	EFEMP2
O95980	0.548	0.842	0.45	0.696	0.826	0.407	0.766	0.71	0.891	1.069	0.783	0.795	0.945	0.729	0.843	0.857	0.598	3.156	1.092	2.9	0.943	2.233	1.146	0.78	0.697	0.823	0.96	0.825	0.905	0.935	1.5923	0.0220899	up	Reversion-inducing cysteine-rich protein with Kazal motifs OS=Homo sapiens OX=9606 GN=RECK PE=1 SV=1	RECK
O95998	0.67	0.719	0.436	0.478	0.618	0.505	0.578	0.615	0.486	0.579	0.612	1.398	1.135	0.955	1.032	1.408	0.962	4.063	2.221	1.699	1.679	1.082	0.789	1.178	0.958	0.878	1.104	1.105	0.758	0.667	2.25924	0.000493959	up	Interleukin-18-binding protein OS=Homo sapiens OX=9606 GN=IL18BP PE=1 SV=2	IL18BP
O96009	1.205	0.832	0.498	0.513	0.709	1.146	0.843	0.658	0.371	0.551	1.525	1.939	1.541	1.412	1.045	1.202	2.123	0.152	1.604	0.268	1.291	0.785	2.313	1.328	1.209	1.116	1.444	1.461	2.923	2.66	2.00253	0.000303184	up	Napsin-A OS=Homo sapiens OX=9606 GN=NAPSA PE=1 SV=1	NAPSA
P00326	0.149	0	0.291	0	0.173	0.118	0.104	0.129	0.213	0.138	0.375	3.496	0.101	12.84	0.912	0.255	1.506	0.175	0	0.056	0	1.301	0	0	0	0	0.296	0	0.588	0	8.32738	0.152531	nosig	Alcohol dehydrogenase 1C OS=Homo sapiens OX=9606 GN=ADH1C PE=1 SV=2	ADH1C
P00338	0.511	0.86	1.234	0.54	1.123	0.602	0.608	1.983	0.538	0.465	1.202	0.72	1.285	2.053	4.756	0.772	0.475	0.642	0.559	0.782	2.046	1.03	0.787	1.058	1.102	0.75	1.711	1.183	1.243	1.033	1.48801	0.121213	nosig	L-lactate dehydrogenase A chain OS=Homo sapiens OX=9606 GN=LDHA PE=1 SV=2	LDHA
P00352	1.426	0.221	0.379	0.436	0.945	0.589	0.115	0.464	0.192	0.526	0.287	3.014	1.151	9.654	1.974	2.66	1.074	0.615	0.26	0.371	0.412	1.907	1.603	0.492	0.41	0.319	1.033	1.082	0.241	0.747	2.76837	0.0664734	nosig	Retinal dehydrogenase 1 OS=Homo sapiens OX=9606 GN=ALDH1A1 PE=1 SV=2	ALDH1A1
P00367	0.634	0.587	0.4	0.428	5.874	0.415	1.654	0.471	2.374	0.539	0.432	0.981	0	2.234	2.371	0.621	0.239	1.346	0.183	1.318	0.512	0.521	0.688	0.231	0.421	5.587	0.37	0.973	0.142	0.251	0.725964	0.560382	nosig	Glutamate dehydrogenase 1, mitochondrial OS=Homo sapiens OX=9606 GN=GLUD1 PE=1 SV=2	GLUD1
P00390	0.038	0.097	0.19	0.034	0.038	0.174	0.21	0.257	0.188	0.049	0.243	1.645	1.029	3.203	3.621	1.44	1.173	1.716	0.141	2.841	1.929	1.841	1.123	1.431	0.215	1.179	0.673	0.213	1.099	1.456	11.0631	9.38E-06	up	Glutathione reductase, mitochondrial OS=Homo sapiens OX=9606 GN=GSR PE=1 SV=2	GSR
P00441	0.967	0.769	1.438	0.647	0.341	0.92	0.889	0.839	0.749	0.961	0.65	1.273	1.253	1.117	1.988	2.19	1.179	0.787	0.554	1.904	1.237	1.875	0.627	1.999	0.738	1.048	1.553	0.964	0.468	0.898	1.42617	0.0212035	up	Superoxide dismutase [Cu-Zn] OS=Homo sapiens OX=9606 GN=SOD1 PE=1 SV=2	SOD1
P00450	2.682	2.481	2.655	1.962	2.607	2.493	2.564	2.451	3.223	2.727	0.455	0.327	2.411	0.337	1.511	0.432	0.176	1.081	0.35	0.598	0.313	0.29	1.722	0.228	0.223	0.232	0.203	0.213	0.351	0.225	0.225924	1.97E-12	down	Ceruloplasmin OS=Homo sapiens OX=9606 GN=CP PE=1 SV=1	CP
P00451	0.643	1.025	0.193	0.652	0.145	0.408	1.174	0.092	1.208	0.363	0.252	1.514	0.716	0.87	2.444	1.773	0.335	3.858	0.409	2.573	0.687	2.748	0.247	1.135	0.494	0.301	0.267	0	0.716	0.626	1.86049	0.0714722	nosig	Coagulation factor VIII OS=Homo sapiens OX=9606 GN=F8 PE=1 SV=1	F8
P00488	1.335	0.544	0.903	1.198	0.985	0.801	1.098	0.903	2.064	1.054	0.73	0.612	1.112	1.161	0.645	0.282	1.825	0.845	1.791	0.829	1.514	2.086	1.257	0.98	1.474	1.924	1.222	0.778	1.878	1.386	1.11764	0.463548	nosig	Coagulation factor XIII A chain OS=Homo sapiens OX=9606 GN=F13A1 PE=1 SV=4	F13A1
P00491	0.2	0.63	1.448	1.083	0.088	1.949	0.282	1.071	0.21	0.995	0.243	0.454	1.186	0.304	1.548	3.115	0.704	0.548	0.691	2.118	1.161	2.223	0.137	1.924	0.42	1.21	3.277	1.248	0.209	1.755	1.53815	0.147866	nosig	Purine nucleoside phosphorylase OS=Homo sapiens OX=9606 GN=PNP PE=1 SV=2	PNP
P00492	0.181	0.212	0.258	0.124	0.938	0.327	0.174	0.238	0.137	1.378	0.255	2.233	0.404	0.21	8.973	2.329	1.728	0.983	0.172	1.317	1.796	0.417	0.213	1.808	1.043	1.622	0.461	0.307	0.175	0.372	3.38014	0.0495195	up	Hypoxanthine-guanine phosphoribosyltransferase OS=Homo sapiens OX=9606 GN=HPRT1 PE=1 SV=2	HPRT1
P00505	0.865	1.035	0.643	1.2	0.894	0.971	0.941	0.553	0.707	1.061	1.284	1.251	0.996	1.186	1.632	1.105	1.352	1.498	1.974	1.775	1.195	0.881	0.847	0.786	1.132	1.032	0.829	1.079	1.358	1.23	1.37666	0.00161398	up	Aspartate aminotransferase, mitochondrial OS=Homo sapiens OX=9606 GN=GOT2 PE=1 SV=3	GOT2
P00533	0.888	0.957	1.12	0.854	2.254	1.25	1.043	1.136	1.402	0.681	1.466	0.945	0.866	0.86	0.587	0.896	1	3.048	0.753	0.869	1.022	1.238	1.329	0.906	0.74	1.289	1.091	0.814	0.866	1.995	0.974536	0.87475	nosig	Epidermal growth factor receptor OS=Homo sapiens OX=9606 GN=EGFR PE=1 SV=2	EGFR
P00558	0.715	1.228	1.334	1.026	1.214	1.674	1.322	1.434	1.29	1.133	0.744	1.304	1.393	1.115	1.098	1.674	1.119	0.593	0.84	1.397	1.027	0.652	1.256	0.944	1.116	1.258	1.794	1.142	0.84	1.404	0.917947	0.352193	nosig	Phosphoglycerate kinase 1 OS=Homo sapiens OX=9606 GN=PGK1 PE=1 SV=3	PGK1
P00568	0.587	0.811	1.663	0.714	0.248	1.244	1.321	1.209	1.124	1.207	1.015	1.277	1.72	0.743	0.806	1.688	1.105	0.11	0.907	1.073	1.368	1.967	1.277	2.183	1.014	1.745	1.034	1.129	1.341	1.61	1.23973	0.166064	nosig	Adenylate kinase isoenzyme 1 OS=Homo sapiens OX=9606 GN=AK1 PE=1 SV=3	AK1
P00734	1.452	1.919	1.852	1.314	1.753	1.656	1.754	1.832	1.736	1.538	1.214	1.144	1.239	1.191	0.871	1.004	1.271	0.193	1.08	0.143	1.328	0.697	1.219	1.188	1.445	1.112	1.175	1.074	1.048	1.291	0.622605	5.19E-07	down	Prothrombin OS=Homo sapiens OX=9606 GN=F2 PE=1 SV=2	F2
P00738	1.121	1.694	1.827	1.245	1.125	1.807	2.072	1.383	2.012	1.801	0.811	0.328	0.824	0.712	2.289	1.291	0.763	0.906	1.727	0.523	0.834	0.532	1.133	0.537	1.57	1.219	0.949	1.203	0.991	0.897	0.622832	0.000656294	down	Haptoglobin OS=Homo sapiens OX=9606 GN=HP PE=1 SV=1	HP
P00739	1.565	1.82	2.559	1.214	1.511	2.733	1.667	3.932	2.791	1.623	1.125	0.059	1.541	0.263	1.035	1	0.508	0.209	1.022	0.093	1.476	0.038	0.601	0.364	2.241	0.741	1.096	1.404	0.392	1.891	0.39923	0.000733087	down	Haptoglobin-related protein OS=Homo sapiens OX=9606 GN=HPR PE=2 SV=2	HPR
P00740	1.866	2.856	2.789	2.04	2.445	2.762	3.319	2.283	2.472	1.964	0.736	0.605	0.72	1.203	1.195	0.583	0.46	0.549	0.954	0.246	0.954	0.317	1.158	0.341	0.79	0.371	0.478	0.499	0.475	0.806	0.271011	4.55E-08	down	Coagulation factor IX OS=Homo sapiens OX=9606 GN=F9 PE=1 SV=2	F9
P00742	1.687	1.434	1.371	1.388	1.721	1.834	1.925	1.897	1.936	1.663	1.338	1.145	1.237	1.097	1.053	0.765	1.451	0.684	0.935	0.318	1.22	0.671	1.316	0.83	1.589	1.017	0.814	1.029	0.64	1.187	0.603227	4.86E-07	down	Coagulation factor X OS=Homo sapiens OX=9606 GN=F10 PE=1 SV=2	F10
P00746	1.101	0.728	1.287	0.914	0.978	1.043	0.968	1.065	1.009	0.964	1.242	1.259	1.215	0.849	1.123	1.201	1.063	1.067	0.946	1.157	1.723	1.552	1.153	1.302	1.324	1.362	1.013	0.913	1.281	1.705	1.21557	0.00424434	nosig	Complement factor D OS=Homo sapiens OX=9606 GN=CFD PE=1 SV=5	CFD
P00747	1.464	1.637	1.485	1.505	1.688	1.397	1.631	1.541	1.559	1.641	1.275	1.148	1.184	1.235	0.819	1.038	1.429	0.552	1.075	0.272	1.185	0.818	1.527	1.07	1.4	1.1	1.01	1.092	1.037	1.372	0.695845	7.86E-07	down	Plasminogen OS=Homo sapiens OX=9606 GN=PLG PE=1 SV=2	PLG
P00748	1.89	1.864	1.002	1.055	1.948	2.199	1.232	1.44	1.732	0.954	1.711	1.064	1.024	1.328	1.052	0.932	2.08	0.805	0.787	0.313	0.826	0.681	0.575	1.19	1.603	0.956	0.786	0.875	1.581	1.518	0.707985	0.0188371	down	Coagulation factor XII OS=Homo sapiens OX=9606 GN=F12 PE=1 SV=3	F12
P00915	0.654	0.669	1.485	0.783	0.315	1.737	0.747	0.649	0.416	1.253	0.513	0.852	2.087	0.561	1.29	3.151	1.219	0.719	0.776	0.843	1.251	2.117	0.771	2.791	0.771	1.319	1.822	1.079	0.332	1.671	1.48915	0.0697972	nosig	Carbonic anhydrase 1 OS=Homo sapiens OX=9606 GN=CA1 PE=1 SV=2	CA1
P00918	0.988	1.181	1.066	1.181	1.001	1.219	1.061	1.003	1	0.958	1.432	1.339	1.175	1.211	0.899	1.116	1.52	1.515	0.906	0.644	1.218	0.993	1.36	1.631	1.247	1.094	1.379	1.231	1.293	1.451	1.1566	0.0119886	nosig	Carbonic anhydrase 2 OS=Homo sapiens OX=9606 GN=CA2 PE=1 SV=2	CA2
P00966	0.065	0	0.033	0.104	10.02	0	0.22	0	0	0	0.167	0.19	0	4.333	2.556	0	0.226	0.28	0	0.171	0.053	0	0	0	0	0	0	0.327	0.262	0.083	0.414097	0.564204	nosig	Argininosuccinate synthase OS=Homo sapiens OX=9606 GN=ASS1 PE=1 SV=2	ASS1
P00995	0.709	0.561	0.894	0.51	0.775	0.63	0.657	0.65	1.018	0.502	0.815	0.65	0.641	0.701	2.494	0.943	0.841	1.436	1.537	4.268	0.96	0.805	0.564	0.746	0.561	0.921	0.553	1.073	0.83	0.933	1.61251	0.0469232	up	Serine protease inhibitor Kazal-type 1 OS=Homo sapiens OX=9606 GN=SPINK1 PE=1 SV=2	SPINK1
P01008	1.599	1.428	1.252	1.418	1.662	1.427	1.547	1.391	1.509	1.65	1.542	1.061	1.126	1.404	0.587	1.138	1.955	0.376	1.155	0.132	1.093	0.719	1.698	1.048	1.868	1.242	1.232	1.241	0.836	1.302	0.764463	0.00400238	down	Antithrombin-III OS=Homo sapiens OX=9606 GN=SERPINC1 PE=1 SV=1	SERPINC1
P01009	1.029	1.192	1.023	0.876	1.073	1.005	0.569	0.859	0.8	1.57	0.707	1.21	0.967	0.916	1.203	2.092	0.965	1.88	0.786	1.899	1.329	0.717	1.036	1.519	0.617	1.457	0.934	0.892	1.236	0.699	1.15351	0.239037	nosig	Alpha-1-antitrypsin OS=Homo sapiens OX=9606 GN=SERPINA1 PE=1 SV=3	SERPINA1
P01011	1.503	1.552	1.421	1.215	1.381	1.33	1.41	1.298	1.409	1.469	1.267	1.113	1.46	0.889	0.878	1.647	1.206	0.853	1.212	0.652	1.233	0.818	1.135	0.976	1.246	1.155	1.172	1.07	0.911	1.361	0.795468	8.12E-05	nosig	Alpha-1-antichymotrypsin OS=Homo sapiens OX=9606 GN=SERPINA3 PE=1 SV=2	SERPINA3
P01019	1.642	1.472	1.274	1.189	1.514	1.316	1.686	1.203	1.516	1.212	1.367	1.133	1.327	1.234	1.113	1.189	1.925	0.252	1.148	0.415	1.568	0.712	1.613	1.618	1.367	1.067	1.217	0.513	0.996	1.213	0.819559	0.0299992	nosig	Angiotensinogen OS=Homo sapiens OX=9606 GN=AGT PE=1 SV=1	AGT
P01023	1.384	1.752	0.933	1.536	1.368	0.979	0.889	1.531	1.625	1.706	1.667	1	1.268	0.704	0.333	0.916	1.697	0.799	1.165	0.478	0.807	1.115	1.033	1.182	1.667	1.188	2.38	1.679	0.802	0.904	0.831351	0.134624	nosig	Alpha-2-macroglobulin OS=Homo sapiens OX=9606 GN=A2M PE=1 SV=3	A2M
P01024	1.269	1.53	1.564	1.154	1.52	1.447	1.425	1.421	1.471	1.425	1.467	1.331	1.451	1.355	0.703	1.394	1.498	0.375	1.275	0.347	0.947	0.838	1.464	1.074	1.289	1.232	1.116	1.244	1.134	1.382	0.805427	0.003489	nosig	Complement C3 OS=Homo sapiens OX=9606 GN=C3 PE=1 SV=2	C3
P01031	1.285	1.641	1.625	1.268	1.424	1.26	1.381	1.487	1.498	1.518	1.133	1.269	1.416	1.003	0.78	1.362	1.019	0.675	1.409	0.21	1.277	0.94	1.237	0.913	1.482	1.262	1.15	1.213	1.298	1.556	0.78557	0.000964926	nosig	Complement C5 OS=Homo sapiens OX=9606 GN=C5 PE=1 SV=4	C5
P01033	0.671	0.717	0.767	0.867	0.657	0.807	0.505	0.72	0.976	0.566	0.668	0.876	0.566	1.042	3.833	0.778	0.781	2.4	1.418	2.758	1.001	1.079	0.582	0.99	0.703	0.701	0.295	0.527	1.178	0.591	1.56949	0.0521908	nosig	Metalloproteinase inhibitor 1 OS=Homo sapiens OX=9606 GN=TIMP1 PE=1 SV=1	TIMP1
P01034	0.742	0.835	0.977	1.023	0.844	0.688	0.958	1.124	1.012	0.956	0.756	1.248	0.608	0.896	3.095	0.935	1.201	1.573	0.779	1.288	1.999	1.198	1.336	1.189	1.051	1.13	0.639	0.84	1.046	1.19	1.31002	0.0400955	up	Cystatin-C OS=Homo sapiens OX=9606 GN=CST3 PE=1 SV=1	CST3
P01042	1.423	1.445	1.306	1.393	1.489	1.531	1.667	1.392	1.483	1.43	1.436	1.046	1.209	1.321	0.771	1.184	1.521	0.607	1.437	0.287	1.238	0.739	1.199	1.109	1.448	1.157	1.09	1.315	1.061	1.322	0.772615	0.000205589	nosig	Kininogen-1 OS=Homo sapiens OX=9606 GN=KNG1 PE=1 SV=2	KNG1
P01127	2.209	0.545	3.097	0.746	0	2.95	0.602	0	0.611	0.568	0.532	0.274	0.364	0.496	0.191	0.318	0.547	2.058	5.514	0.985	0.431	0.625	0.413	1.595	0.733	2.671	0.523	0.297	0	0	0.819518	0.665809	nosig	Platelet-derived growth factor subunit B OS=Homo sapiens OX=9606 GN=PDGFB PE=1 SV=1	PDGFB
P01133	0	0.788	1.492	3.454	0.418	0.804	0	0.346	1.049	1.483	0	0.755	0	0.717	0	0.143	0	0.438	0.996	2.516	0.788	2.669	0	0.269	0.094	0.226	0	0	1.596	0.503	0.595383	0.298808	nosig	Pro-epidermal growth factor OS=Homo sapiens OX=9606 GN=EGF PE=1 SV=2	EGF
P01137	1.501	2.186	1.488	1.644	0.98	1.412	0.654	2.035	2.303	0.333	0.704	0.122	0.088	1.486	0.129	0.433	1.079	0.81	3.025	1.143	0.563	1.209	0.433	1.481	0.781	1.536	0.371	0.78	3.342	1.461	0.721519	0.1645	nosig	Transforming growth factor beta-1 proprotein OS=Homo sapiens OX=9606 GN=TGFB1 PE=1 SV=2	TGFB1
P01242	0.429	0.531	0.354	0	0.356	0.523	0.292	0.407	1.294	5.704	0.627	0.633	1.177	1.798	1.008	0.657	0.443	3.407	1.187	1.231	0.527	1.685	0.847	0	1.476	0.338	0.815	0	0.741	0.785	0.979879	0.972297	nosig	Growth hormone variant OS=Homo sapiens OX=9606 GN=GH2 PE=1 SV=3	GH2
P01266	1.346	1.339	1.465	1.295	2.054	0.999	1.769	0.818	1.245	1.35	1.467	1.013	1.012	1.494	0.539	1.102	1.868	0.427	1.064	0.447	0.83	0.777	1.638	1.705	1.398	1.128	1.368	1.278	1.217	1.494	0.850365	0.16926	nosig	Thyroglobulin OS=Homo sapiens OX=9606 GN=TG PE=1 SV=5	TG
P01275	0.44	1.563	0.887	0.39	0.454	0.616	1.004	0.85	0.523	0.307	0.967	0.758	0.568	0.598	6.71	0.911	0.797	0.467	0.454	2.168	0	0.943	0.429	0.732	0.561	1.083	1.021	1.658	1.361	0.569	1.6175	0.206451	nosig	Pro-glucagon OS=Homo sapiens OX=9606 GN=GCG PE=1 SV=3	GCG
P01344	1.232	1.67	1.254	1.554	1.348	1.643	1.502	0.654	1.364	1.427	1.473	1.23	1.176	1.41	0.96	0.646	1.474	0.824	0.988	0.325	1.405	0.52	1.119	1.22	1.815	1.514	1.164	1.454	0.939	1.436	0.845985	0.104694	nosig	Insulin-like growth factor II OS=Homo sapiens OX=9606 GN=IGF2 PE=1 SV=1	IGF2
P01591	1.282	1.266	0.966	1.68	3.232	0.666	0.607	1.03	0.747	1.605	0.869	2.511	0.326	0.535	0.515	2.189	0.589	2.81	0.661	1.278	2.287	0.81	0.749	1.021	0.975	0.496	0.408	0.583	0.814	0.273	0.791186	0.372379	nosig	Immunoglobulin J chain OS=Homo sapiens OX=9606 GN=JCHAIN PE=1 SV=4	JCHAIN
P01594	1.431	1.484	0.806	0.978	0.649	1.068	1.358	0.849	0.623	0.807	1.266	1.149	0.997	0.44	1.107	0.682	0.612	3.058	0.895	2.282	0.457	0.534	0.821	0.818	1.386	1.011	1.022	0.701	1.29	1.441	1.09266	0.593811	nosig	Immunoglobulin kappa variable 1-33 OS=Homo sapiens OX=9606 GN=IGKV1-33 PE=1 SV=2	IGKV1-33
P01599	2.039	0.857	0.811	1.269	1.114	0.956	0.894	0.893	1	2.168	0.891	1.569	0.481	0.931	0.666	0.593	0.256	3.372	0.49	1.517	1.914	1.058	1.111	1.184	0.612	0.688	0.779	0.757	1.181	0.732	0.865845	0.469514	nosig	Immunoglobulin kappa variable 1-17 OS=Homo sapiens OX=9606 GN=IGKV1-17 PE=1 SV=2	IGKV1-17
P01602	2.405	1.132	0.83	1.561	1.401	1.004	1.39	0.989	1.855	1.181	0.764	1.133	0.677	0.571	0.61	0.866	0.445	3.175	0.939	1.679	1.466	0.807	0.779	0.887	0.73	0.875	0.643	0.567	0.838	0.884	0.703193	0.0536435	nosig	Immunoglobulin kappa variable 1-5 OS=Homo sapiens OX=9606 GN=IGKV1-5 PE=1 SV=2	IGKV1-5
P01619	1.166	0.889	0.644	0.845	1.524	0.71	0.799	0.691	1.395	0.592	1.393	2.135	0.892	0.894	0.335	0.834	0.417	2.805	0.899	1.685	2.823	0.942	0.798	1.099	0.671	2.008	0.76	0.561	0.895	0.78	1.27639	0.196322	nosig	Immunoglobulin kappa variable 3-20 OS=Homo sapiens OX=9606 GN=IGKV3-20 PE=1 SV=2	IGKV3-20
P01624	1.388	1.124	0.886	1.079	1.701	0.933	0.877	1.331	1.531	0.958	1.182	1.698	0.613	0.576	0.513	1.055	0.536	1.958	1.078	1.822	1.955	1.122	0.823	1.328	0.815	1.242	0.654	0.671	1.172	0.78	0.914338	0.476729	nosig	Immunoglobulin kappa variable 3-15 OS=Homo sapiens OX=9606 GN=IGKV3-15 PE=1 SV=2	IGKV3-15
P01700	1.966	1.296	0.666	1.783	1.786	1.357	1.12	0.646	1.781	3.083	0.845	0.873	0.67	0.277	0.567	0.519	0.744	1.735	0.505	1.307	2.199	1.856	1.317	0.528	0.731	1.046	0.764	0.616	1.029	0.854	0.612955	0.0324875	down	Immunoglobulin lambda variable 1-47 OS=Homo sapiens OX=9606 GN=IGLV1-47 PE=1 SV=2	IGLV1-47
P01701	0	0.949	1.157	1.036	1.021	0.838	0.618	1.305	1.488	0.808	0.881	1.241	0.39	0.476	0.605	0.626	0.49	2.559	0.894	1.983	1.763	1.5	0.779	0.856	0.997	1.726	0.896	0.935	1.501	0.729	1.18368	0.362493	nosig	Immunoglobulin lambda variable 1-51 OS=Homo sapiens OX=9606 GN=IGLV1-51 PE=1 SV=2	IGLV1-51
P01703	0.626	0.69	0.649	1.199	1.011	1.06	0.568	0.525	1.048	0.587	0.925	1.116	0.447	0.932	0.393	0.996	1.206	0.893	1.534	2.032	3.005	1.784	0.985	1.416	1.063	3.034	0.663	0.548	1.308	0.934	1.5832	0.0167031	up	Immunoglobulin lambda variable 1-40 OS=Homo sapiens OX=9606 GN=IGLV1-40 PE=1 SV=2	IGLV1-40
P01704	0.311	0.55	0.345	2.531	1.952	0.3	0.665	0.513	0.748	1.168	0.885	0.75	0.62	1.097	0.504	1.116	0.247	5.8	0.885	1.238	1.075	1.97	0.068	0.565	0.618	0.947	0.644	1.249	0.779	0.677	1.19641	0.621666	nosig	Immunoglobulin lambda variable 2-14 OS=Homo sapiens OX=9606 GN=IGLV2-14 PE=1 SV=2	IGLV2-14
P01705	1.035	0.776	1.403	1.003	1.059	1.759	1.295	1.047	1.489	0.819	2.057	1.202	1.031	1.041	1.231	1.022	0.939	1.72	0.738	1.799	0.827	0.584	0.951	0.708	1.918	0.949	0.675	0.297	0.842	1.671	0.950021	0.69222	nosig	Immunoglobulin lambda variable 2-23 OS=Homo sapiens OX=9606 GN=IGLV2-23 PE=1 SV=2	IGLV2-23
P01709	0.352	0.333	1.001	2.347	2.93	0.74	0	1.319	2.607	0.482	0.684	1.544	1.197	0.538	0.747	1.004	0.69	2.959	0.292	0.953	0.745	1.1	0.453	1.037	0.732	1.158	0	1.185	1.562	0.681	0.795186	0.503505	nosig	Immunoglobulin lambda variable 2-8 OS=Homo sapiens OX=9606 GN=IGLV2-8 PE=1 SV=2	IGLV2-8
P01714	0.737	0.969	0.011	1.185	1.077	1.088	0.656	0.654	1.51	0.425	0.471	0.808	0.567	0.296	0.361	1.465	0.524	4.745	1.014	2.491	2.038	1.464	0.565	0.975	0.341	1.122	0.443	0.535	0.958	0.635	1.31244	0.342382	nosig	Immunoglobulin lambda variable 3-19 OS=Homo sapiens OX=9606 GN=IGLV3-19 PE=1 SV=2	IGLV3-19
P01717	0.72	1.624	0.735	1.482	0.985	1.559	0.675	0.596	1.362	1.545	0.907	1.336	0.475	0.634	0.754	0.602	2.268	2.169	1.207	1.771	1.714	1.173	0.952	0.415	0.905	1.328	1	1.02	1.091	0.365	0.978729	0.895388	nosig	Immunoglobulin lambda variable 3-25 OS=Homo sapiens OX=9606 GN=IGLV3-25 PE=1 SV=2	IGLV3-25
P01718	1.858	0.543	0.226	0	0	2.675	0	0	1.774	0	0.666	0.923	1.776	0.112	0	0	0	0.594	2.627	0.934	0.134	0.867	1.388	0	0	1.429	1.639	1.234	0.718	0	1.06282	0.903353	nosig	Immunoglobulin lambda variable 3-27 OS=Homo sapiens OX=9606 GN=IGLV3-27 PE=1 SV=2	IGLV3-27
P01721	0.534	1.048	0.663	0.975	0.941	0.835	0.418	0.617	1.314	0.697	0.624	0.179	0.502	0.541	0.075	0.578	0.38	6.152	0.72	1.877	1.962	1.636	1.215	0.742	0.316	2.514	0.737	0.406	0.37	0.516	1.37043	0.35588	nosig	Immunoglobulin lambda variable 6-57 OS=Homo sapiens OX=9606 GN=IGLV6-57 PE=1 SV=2	IGLV6-57
P01742	1.078	0.679	0.79	1.755	0.891	0.951	0.634	0.685	1.231	1.042	1.043	0.906	0.628	0.461	0.596	0.739	0.399	4.426	0.635	2.746	1.397	1.531	0.633	0.935	0.559	0.734	0.391	0.457	0.607	0.452	1.04124	0.869391	nosig	Immunoglobulin heavy variable 1-69 OS=Homo sapiens OX=9606 GN=IGHV1-69 PE=1 SV=2	IGHV1-69
P01743	0.883	0.529	0.61	0.132	1.943	0.855	0.878	0.714	0.668	0	0.484	1.426	0.791	0.577	0	0.798	1.454	0.06	0.456	1.819	3.905	1.188	1.594	2.406	0	1.976	0.659	0.575	1.705	1.653	1.63103	0.102551	nosig	Immunoglobulin heavy variable 1-46 OS=Homo sapiens OX=9606 GN=IGHV1-46 PE=1 SV=2	IGHV1-46
P01763	1.368	1.237	0.77	1.663	2.624	1.063	1.126	0.755	1.557	1.334	1.039	1.094	0.754	0.875	0.633	1.179	0.621	2.79	0.699	1.104	1.623	1.028	0.809	1.273	0.778	1.067	0.767	0.791	0.77	0.832	0.760391	0.1272	nosig	Immunoglobulin heavy variable 3-48 OS=Homo sapiens OX=9606 GN=IGHV3-48 PE=1 SV=2	IGHV3-48
P01780	1.825	0.98	0.832	1.815	1.629	0.864	1.401	1.003	1.78	1.526	1.541	1.55	0.659	0.913	0.556	1.561	0.345	1.389	0.882	1.66	1.37	0.902	1.132	1.315	0.549	0.921	0.656	0.856	0.91	0.945	0.754742	0.0456251	down	Immunoglobulin heavy variable 3-7 OS=Homo sapiens OX=9606 GN=IGHV3-7 PE=1 SV=2	IGHV3-7
P01782	1.106	1.023	1.097	2.772	0.75	0.929	0.93	1.186	1.665	1.515	0.914	1.623	0.362	0.398	0.649	0.384	0.254	2.884	0.287	2.669	1.532	0.612	1.031	1.031	0.52	0.319	0.685	0.731	1.272	0.548	0.72092	0.160242	nosig	Immunoglobulin heavy variable 3-9 OS=Homo sapiens OX=9606 GN=IGHV3-9 PE=1 SV=2	IGHV3-9
P01817	0.878	1.074	1.255	1.768	2.521	0.622	0.857	0.805	1.126	1.011	1.828	1.235	1.147	1.598	0.791	1.816	0.749	0	1.366	0.712	2.432	1.346	1.256	1.493	0.791	0.919	0.983	0.721	0.867	0.944	0.964756	0.846156	nosig	Immunoglobulin heavy variable 2-5 OS=Homo sapiens OX=9606 GN=IGHV2-5 PE=1 SV=2	IGHV2-5
P01833	1.417	1.352	1.557	1.17	1.662	1.186	1.431	1.341	1.585	1.018	1.435	1.695	1.756	1.102	0.649	1.653	1.487	0.193	1.479	0.678	1.538	0.343	1.16	1.244	1.414	1.092	1.094	0.964	0.945	1.292	0.846016	0.0806404	nosig	Polymeric immunoglobulin receptor OS=Homo sapiens OX=9606 GN=PIGR PE=1 SV=4	PIGR
P01834	2.741	1.104	1.144	1.465	1.767	0.976	1.053	1.194	1.647	0.844	1.196	1.047	0.724	0.822	0.489	0.784	0.336	2.651	0.845	1.425	1.386	1.121	0.607	1.067	0.663	1.364	0.79	0.66	0.991	0.772	0.708288	0.0681268	nosig	Immunoglobulin kappa constant OS=Homo sapiens OX=9606 GN=IGKC PE=1 SV=2	IGKC
P01854	1.183	1.809	1.348	1.34	1.515	1.732	1.335	1.968	1.678	1.92	1.941	0.944	1.136	1.605	0.644	1.418	1.086	0.446	1.552	0.312	0.684	1.163	0.992	0.746	1.185	0.912	0.978	1.469	1.042	1.066	0.673522	0.000351617	down	Immunoglobulin heavy constant epsilon OS=Homo sapiens OX=9606 GN=IGHE PE=1 SV=1	IGHE
P01857	1.156	1.129	1.372	1.207	1.379	1.212	1.38	0.991	1.633	1.307	1.299	1.336	0.955	1.08	0.598	0.757	0.96	1.583	1.175	0.853	1.987	1.306	1.148	1.141	0.993	1.242	1	0.872	1.085	1.005	0.876351	0.0838524	nosig	Immunoglobulin heavy constant gamma 1 OS=Homo sapiens OX=9606 GN=IGHG1 PE=1 SV=1	IGHG1
P01871	1.597	1.274	0.645	2.092	2.65	0.75	0.695	0.85	0.645	1.607	0.766	1.792	0.401	0.421	0.646	1.678	0.64	2.309	0.607	1.685	3.931	0.606	0.559	1.008	1.309	0.501	0.433	0.282	0.796	0.307	0.80738	0.414489	nosig	Immunoglobulin heavy constant mu OS=Homo sapiens OX=9606 GN=IGHM PE=1 SV=4	IGHM
P01876	2.047	1.045	0.927	1.735	1.735	0.827	0.884	0.94	0.625	0.969	0.808	0.962	0.738	0.559	0.504	1.21	0.327	3.443	0.623	2.678	0.042	0.936	1.066	0.959	0.715	1.163	0.328	0.79	1.365	0.304	0.831771	0.406903	nosig	Immunoglobulin heavy constant alpha 1 OS=Homo sapiens OX=9606 GN=IGHA1 PE=1 SV=2	IGHA1
P01880	1.223	0.392	0.663	0.653	0.551	0.603	0.818	0.37	0.265	1.553	0.369	1.732	0.583	2.469	0.93	0.997	1.759	0.915	1.394	1.354	1.732	0.877	0.804	0.842	1.454	2.366	1.61	2.151	1.013	1.654	1.90417	0.00166646	up	Immunoglobulin heavy constant delta OS=Homo sapiens OX=9606 GN=IGHD PE=1 SV=3	IGHD
P01911	1.683	0.695	0	1	3.565	0.345	0.509	1.241	2.835	1.341	0.419	1.638	0.829	0.865	0.616	0.289	0.606	0.509	0.265	3.556	1.126	0.278	0.706	1.229	0.658	0	0.83	0.371	1.557	0.307	0.630165	0.236673	nosig	HLA class II histocompatibility antigen, DRB1 beta chain OS=Homo sapiens OX=9606 GN=HLA-DRB1 PE=1 SV=2	HLA-DRB1
P02042	0.039	0.035	0.061	0.031	0.021	0.067	0.023	0.31	0.031	0.047	0.049	3.608	0.054	0.061	2.896	0.267	0.128	3.195	0.059	2.751	0.103	5.593	0.101	6.736	0.059	0.067	0.074	0.28	0.025	0.102	19.7053	0.014829	up	Hemoglobin subunit delta OS=Homo sapiens OX=9606 GN=HBD PE=1 SV=2	HBD
P02144	1.223	1.146	0.743	0.802	1.095	1.165	0.97	1.328	0.934	0.649	1.297	0.606	0.713	1.03	4.766	0.607	0.872	1.741	0.787	0.581	1.212	0.644	0.951	1.63	1.249	1.004	0.647	1.106	0.781	1.409	1.17519	0.422298	nosig	Myoglobin OS=Homo sapiens OX=9606 GN=MB PE=1 SV=2	MB
P02452	0.821	0.395	0.349	0.86	0.62	0.64	0.809	0.567	0.343	0.525	0.852	0.716	0.553	1.211	2.97	0.809	1.409	3.341	0.896	1.653	0.626	1.325	0.722	1.779	1.385	0.984	0.66	0.955	1.526	0.768	2.12009	0.00103843	up	Collagen alpha-1(I) chain OS=Homo sapiens OX=9606 GN=COL1A1 PE=1 SV=5	COL1A1
P02461	0.97	0.445	0.451	0.687	0.453	0.93	0.5	0.63	0.83	0.699	0.335	0.552	0.882	0.649	6.539	1.292	0.814	1.975	0.655	2.637	0.327	0.939	0.798	0.401	0.452	0.612	0.762	1.002	0.95	0.211	1.72737	0.146779	nosig	Collagen alpha-1(III) chain OS=Homo sapiens OX=9606 GN=COL3A1 PE=1 SV=4	COL3A1
P02511	0.01	0	0	0.005	0	1.742	0	0	0.003	0.007	0	3.644	0	0	0.088	0	0	0.05	3.049	0.019	0.007	0.01	12.084	0	0	0.008	0.005	0.002	0	0	5.36672	0.250236	nosig	Alpha-crystallin B chain OS=Homo sapiens OX=9606 GN=CRYAB PE=1 SV=2	CRYAB
P02533	0.626	1.203	2.031	1.441	1.074	0.914	1.957	0.646	2.365	1.029	0.429	0.424	0.484	0.526	0.4	0.931	0.254	1.589	0.989	0.724	1.254	0.944	1.113	0.683	0.461	8.625	0.307	0.903	0.419	0.547	0.828165	0.613528	nosig	Keratin, type I cytoskeletal 14 OS=Homo sapiens OX=9606 GN=KRT14 PE=1 SV=4	KRT14
P02538	1.348	0.768	0.892	1.101	0.748	1.725	3.258	0.719	3.66	0.814	0.749	0.843	1.086	0.633	0.432	1.015	0.759	0.515	1.22	0.794	0.512	0.647	1.332	1.035	0.589	5.088	1.104	1.396	0.619	1.074	0.713164	0.304734	nosig	Keratin, type II cytoskeletal 6A OS=Homo sapiens OX=9606 GN=KRT6A PE=1 SV=3	KRT6A
P02549	1.134	0.181	1.113	1.536	0.219	0.986	1.031	1.146	1.257	1.319	1.276	1.225	1.397	1.308	0.968	2.086	1.329	0.976	1.291	0.876	0.301	1.293	1.231	2.177	1.15	1.179	0.988	1.43	1.325	1.284	1.26436	0.133333	nosig	Spectrin alpha chain, erythrocytic 1 OS=Homo sapiens OX=9606 GN=SPTA1 PE=1 SV=5	SPTA1
P02647	1.056	1.48	1.285	1.283	1.383	1.284	1.347	1.257	1.351	1.294	1.514	1.224	1.312	1.557	0.601	1.332	1.565	0.431	1.253	0.111	1.483	1.043	1.358	1.187	1.187	1.324	1.328	1.435	1.594	1.312	0.927458	0.325216	nosig	Apolipoprotein A-I OS=Homo sapiens OX=9606 GN=APOA1 PE=1 SV=1	APOA1
P02649	0.937	1.123	0.727	1.109	0.914	0.936	0.896	0.814	0.935	0.833	1.102	1.4	1.072	1.032	1.808	1.2	1.598	1.754	2.003	1.642	1.04	0.697	0.974	0.755	0.955	1.09	0.793	1.002	1.246	0.992	1.30936	0.00447705	up	Apolipoprotein E OS=Homo sapiens OX=9606 GN=APOE PE=1 SV=1	APOE
P02654	0.926	1.569	1.462	1.198	1.619	1.414	1.494	1.249	1.201	1.141	1.678	1.17	1.311	1.278	0.569	1.24	1.95	0.138	1.776	0.154	1.267	0.658	1.449	0.879	1.411	1.517	1.283	1.285	1.938	1.415	0.917878	0.421878	nosig	Apolipoprotein C-I OS=Homo sapiens OX=9606 GN=APOC1 PE=1 SV=1	APOC1
P02656	1.446	2.1	1.507	1.529	1.371	1.776	2.038	1.772	1.547	1.307	1.522	1.328	0.983	1.262	0.648	0.875	2.68	0.064	1.416	0.135	1.183	0.499	1.519	0.8	1.389	0.721	0.784	1.34	1.246	1.402	0.664796	0.00135641	down	Apolipoprotein C-III OS=Homo sapiens OX=9606 GN=APOC3 PE=1 SV=1	APOC3
P02671	0.816	1.202	1.154	1.468	0.731	0.847	0.937	0.826	1.064	1.457	0.473	1.089	0.86	0.65	1.53	2.213	0.492	0.85	1.119	0.861	1.094	1.175	1.087	1.881	0.56	0.666	3.738	1.734	1.156	0.874	1.1475	0.419257	nosig	Fibrinogen alpha chain OS=Homo sapiens OX=9606 GN=FGA PE=1 SV=2	FGA
P02675	0.212	0.113	0.138	0.281	0.071	0.108	0.157	0.101	0.238	0.184	0.126	0.385	0.111	0.144	1.91	1.798	0.173	0.334	0.209	1.673	0.288	0.349	0.657	1.545	0.133	0.142	19.208	0.627	0.317	0.111	9.43231	0.167446	nosig	Fibrinogen beta chain OS=Homo sapiens OX=9606 GN=FGB PE=1 SV=2	FGB
P02730	0.702	0.26	2.504	0.289	0.133	0.411	0.099	0.399	0.44	2.525	0.716	0.383	0.076	2.552	1.095	3.663	1.938	0.089	0.168	0.581	3.239	1.417	0.693	2.191	0.654	0.649	0.581	4.47	0.326	2.135	1.77892	0.154906	nosig	Band 3 anion transport protein OS=Homo sapiens OX=9606 GN=SLC4A1 PE=1 SV=3	SLC4A1
P02741	0.998	1.653	2.451	0.911	0.705	1.775	1.24	1.362	1.374	1.912	0.946	1.057	0.992	0.76	0.995	1.26	0.783	0.851	1.343	2.226	0.376	1.373	1.002	0.624	0.982	1.139	0.239	0.674	0.728	1.124	0.677074	0.027381	down	C-reactive protein OS=Homo sapiens OX=9606 GN=CRP PE=1 SV=1	CRP
P02743	2.54	2.029	2.059	1.155	1.176	2.379	2.387	2.479	1.8	1.72	1.072	0.928	1.083	0.525	0.669	0.929	0.927	0.379	1.019	0.21	0.596	0.435	1.212	0.669	1.448	1.306	1.121	1.352	0.954	1.491	0.464536	4.36E-05	down	Serum amyloid P-component OS=Homo sapiens OX=9606 GN=APCS PE=1 SV=2	APCS
P02747	1.305	1.323	1.235	1.637	1.27	1.26	1.476	1.328	1.139	1.54	1.092	1.031	1.242	0.754	0.869	1.368	0.919	1.762	1.209	0.806	1.284	0.994	1.226	1.023	1.158	0.843	1.079	0.862	1.039	1.138	0.802857	0.000910793	nosig	Complement C1q subcomponent subunit C OS=Homo sapiens OX=9606 GN=C1QC PE=1 SV=3	C1QC
P02748	1.447	1.4	1.779	1.173	1.595	1.601	1.033	1.466	1.597	1.578	1.031	0.98	1.619	0.669	0.832	1.477	1.036	0.429	1.497	0.317	1.467	0.805	1.575	0.85	1.417	1.11	1.415	1.236	1.12	1.554	0.764742	0.00441706	down	Complement component C9 OS=Homo sapiens OX=9606 GN=C9 PE=1 SV=2	C9
P02749	1.49	1.503	1.264	1.22	0.906	1.441	1.561	1.328	1.572	1.368	1.402	1.359	1.319	1.261	0.84	1.339	1.448	0.554	0.999	0.277	1.489	0.767	1.18	1.176	1.441	1.414	1.076	1.122	1.273	1.585	0.854061	0.0527471	nosig	Beta-2-glycoprotein 1 OS=Homo sapiens OX=9606 GN=APOH PE=1 SV=3	APOH
P02750	1.007	1.157	1.187	1.151	1.29	0.952	0.963	1.243	1.291	1.484	1.004	1.113	1.782	1.128	1.042	1.94	1.036	1.118	1.701	0.838	1.555	0.767	1.215	1.024	1.198	1.117	1.18	0.933	0.84	1.206	1.01224	0.872566	nosig	Leucine-rich alpha-2-glycoprotein OS=Homo sapiens OX=9606 GN=LRG1 PE=1 SV=2	LRG1
P02751	1.066	1.691	1.835	1.119	0.803	1.66	1.628	1.627	1.684	1.737	1.592	1.756	1.4	1.295	0.67	0.466	1.194	0.079	1.289	0.321	1.005	1.414	1.232	1.155	1.425	2.101	0.149	1.039	1.442	1.383	0.754444	0.0343855	down	Fibronectin OS=Homo sapiens OX=9606 GN=FN1 PE=1 SV=5	FN1
P02760	1.28	1.484	1.28	1.29	1.326	1.271	1.593	1.49	1.37	1.348	1.258	1.307	1.348	1.161	1.537	1.204	1.367	0.69	1.327	0.329	1.062	0.857	1.152	1.085	1.142	1.218	1.091	1.059	1.266	1.283	0.828102	0.00195203	nosig	Protein AMBP OS=Homo sapiens OX=9606 GN=AMBP PE=1 SV=1	AMBP
P02763	1.747	1.921	1.986	1.094	1.787	1.874	1.848	1.461	1.466	1.327	0.821	0.839	1.015	0.754	1.138	1.023	1.157	0.954	0.989	0.812	1.854	0.647	1.047	0.888	1.111	0.957	0.996	0.912	0.778	0.934	0.594331	1.58E-05	down	Alpha-1-acid glycoprotein 1 OS=Homo sapiens OX=9606 GN=ORM1 PE=1 SV=1	ORM1
P02765	1.54	1.657	1.171	1.482	1.308	1.33	1.491	1.322	1.34	1.223	1.478	1.097	1.147	1.513	0.727	0.828	1.676	0.831	1.248	0.312	1.361	0.763	1.358	1.084	1.497	1.372	1.15	1.183	1.089	1.222	0.827178	0.0105707	nosig	Alpha-2-HS-glycoprotein OS=Homo sapiens OX=9606 GN=AHSG PE=1 SV=2	AHSG
P02766	1.355	1.616	1.626	1.694	1.727	1.29	1.876	1.604	1.53	1.721	1.093	1.078	0.906	1.363	0.821	1.082	1.428	0.867	0.81	0.276	1.152	0.683	1.344	1.33	1.357	0.993	1.08	1.022	1.016	1.234	0.652628	4.00E-07	down	Transthyretin OS=Homo sapiens OX=9606 GN=TTR PE=1 SV=1	TTR
P02768	1.474	1.135	1.066	1.233	1.272	1.402	1.185	1.054	1.017	1.059	1.373	1.119	1.35	1.143	1.071	1.107	1.293	1.223	1.045	0.644	1.674	0.806	1.209	1.395	1.288	1.043	1.183	1.134	1.268	1.381	0.998109	0.974471	nosig	Albumin OS=Homo sapiens OX=9606 GN=ALB PE=1 SV=2	ALB
P02774	1.449	1.526	1.489	1.377	1.498	1.422	1.509	1.287	1.443	1.7	1.325	1.181	1.221	1.193	0.777	1.23	1.546	0.702	1.045	0.31	1.204	0.703	1.411	1.292	1.514	1.08	1.121	1.158	1.096	1.184	0.758265	5.88E-05	down	Vitamin D-binding protein OS=Homo sapiens OX=9606 GN=GC PE=1 SV=2	GC
P02775	1.378	1.716	1.693	2.073	1.387	1.611	1.004	1.415	1.923	1.563	1.356	0.569	0.471	2.13	0.231	0.548	1.357	0.904	2.232	0.72	0.865	1.103	0.688	1.087	1.188	0.955	0.262	0.902	1.724	1.266	0.652097	0.00150833	down	Platelet basic protein OS=Homo sapiens OX=9606 GN=PPBP PE=1 SV=3	PPBP
P02776	1.043	1.859	2.15	1.093	1.766	2.43	1.189	1.787	2.197	1.47	1.153	0.575	0.55	2.684	0.15	0.336	1.137	0.259	3.112	0.789	0.827	0.208	0.599	1.337	0.975	1.152	0.194	0.729	2.087	1.384	0.595767	0.00759594	down	Platelet factor 4 OS=Homo sapiens OX=9606 GN=PF4 PE=1 SV=2	PF4
P02786	0.839	0.911	0.933	1.575	1.981	0.777	1.06	0.868	0.793	1.592	0.851	0.821	1.001	1.057	1.109	1.319	0.919	2.174	0.897	1.169	1.218	1.638	1.492	0.706	1.047	0.878	0.779	1.09	1.202	1.13	0.992894	0.959049	nosig	Transferrin receptor protein 1 OS=Homo sapiens OX=9606 GN=TFRC PE=1 SV=2	TFRC
P02787	1.294	1.41	1.103	1.213	1.468	1.412	1.331	1.09	1.45	1.33	1.281	1.141	1.204	1.019	0.885	1	1.354	1.261	1.214	0.558	1.664	1.211	1.356	1.057	1.313	1.124	0.984	1.044	1.014	1.067	0.868292	0.0143775	nosig	Serotransferrin OS=Homo sapiens OX=9606 GN=TF PE=1 SV=3	TF
P02790	1.446	1.527	1.47	1.106	1.518	1.515	1.497	1.484	1.722	1.279	1.201	1.311	1.766	1.323	0.578	1.612	1.569	0.365	1.199	0.073	1.811	0.387	1.379	1.392	1.262	1.209	1.273	1.059	1.143	1.281	0.796244	0.0168126	nosig	Hemopexin OS=Homo sapiens OX=9606 GN=HPX PE=1 SV=2	HPX
P03950	1.668	1.734	1.476	1.234	1.469	1.519	1.533	1.674	1.247	1.275	0.971	1.57	1.34	1.714	0.61	1.469	1.725	0.635	1.345	0.196	1.174	0.575	1.488	0.495	1.467	1.318	1.12	1.03	1.09	1.222	0.760469	0.00373693	down	Angiogenin OS=Homo sapiens OX=9606 GN=ANG PE=1 SV=1	ANG
P03951	1.754	1.204	2.291	2.166	2.508	1.857	3.424	1.833	2.357	1.743	1.182	0.466	0.685	0.893	0.831	0.388	1.575	0.848	1.015	0.426	0.431	0.855	0.824	0.628	0.957	0.655	0.611	0.824	0.734	1.398	0.383829	3.69E-05	down	Coagulation factor XI OS=Homo sapiens OX=9606 GN=F11 PE=1 SV=1	F11
P03952	1.531	1.667	1.595	1.715	1.69	1.749	2.001	1.771	1.768	1.604	1.124	0.961	1.327	1.22	0.83	1.063	1.586	0.491	1.289	0.177	0.939	0.462	1.233	0.781	1.393	0.952	1.054	1.177	0.916	1.626	0.602686	6.49E-08	down	Plasma kallikrein OS=Homo sapiens OX=9606 GN=KLKB1 PE=1 SV=1	KLKB1
P03956	3.152	1.22	0.831	0.982	1.649	0.593	0.8	1.287	1.559	1.439	1.111	0.919	1.279	1.136	0.64	1.988	0.774	1.344	1.083	1.106	1.175	0.895	1.31	1.309	0.786	0.931	0.987	0.967	0.716	1.171	0.800289	0.28141	nosig	Interstitial collagenase OS=Homo sapiens OX=9606 GN=MMP1 PE=1 SV=3	MMP1
P03973	1.366	1.14	1.139	1.355	1.368	1.104	1.629	1.207	1.797	1.312	0.686	0.681	0.901	0.821	2.808	1.534	1.036	1.834	0.852	0.976	0.652	0.459	1.168	0.711	1.356	1.007	0.631	0.825	0.826	1.21	0.78162	0.0431175	nosig	Antileukoproteinase OS=Homo sapiens OX=9606 GN=SLPI PE=1 SV=2	SLPI
P04003	1.558	1.423	1.452	1.248	1.593	1.585	1.688	1.653	1.695	1.565	1.391	1.199	1.327	1.293	0.721	1.182	1.313	0.458	1.312	0.342	1.136	0.609	1.653	0.942	1.357	1.18	1.072	1.165	1.022	1.152	0.705886	1.27E-05	down	C4b-binding protein alpha chain OS=Homo sapiens OX=9606 GN=C4BPA PE=1 SV=2	C4BPA
P04004	1.322	1.778	1.495	1.236	1.586	1.493	1.575	1.51	1.381	1.337	1.184	1.528	1.32	1.33	0.669	1.331	1.741	0.379	1.263	0.165	1.123	0.696	1.36	1.18	1.398	1.227	1.23	1.096	1.132	1.431	0.774247	0.00240235	nosig	Vitronectin OS=Homo sapiens OX=9606 GN=VTN PE=1 SV=1	VTN
P04040	0.189	0.551	1.806	0.958	2.037	0.376	2.173	0.226	0.197	1.5	1.446	1.411	1.626	1.397	1.598	1.169	1.711	0.226	1.574	0.454	1.658	1.33	1.935	1.841	0.92	1.272	1.472	0.49	1.071	1.479	1.30231	0.292861	nosig	Catalase OS=Homo sapiens OX=9606 GN=CAT PE=1 SV=3	CAT
P04066	1.018	1.01	1.052	0.518	0.581	0.881	1.303	1.224	0.944	0.657	1.582	1.758	1.917	1.443	0.93	0.992	1.542	0.902	0.798	1.01	1.179	0.832	1.697	1.896	1.157	1.462	1.134	1.185	1.487	1.116	1.41592	0.00284931	up	Tissue alpha-L-fucosidase OS=Homo sapiens OX=9606 GN=FUCA1 PE=1 SV=4	FUCA1
P04070	1.621	1.892	1.64	1.023	1.903	1.671	2.355	1.975	1.58	1.598	1.35	1.334	1.359	0.793	0.842	1.121	1.412	0.065	0.943	0.109	1.052	0.476	1.37	0.914	1.505	1.503	1.394	1.013	0.956	1.353	0.604473	0.000106716	down	Vitamin K-dependent protein C OS=Homo sapiens OX=9606 GN=PROC PE=1 SV=1	PROC
P04075	1.027	0.944	1.252	0.943	0.77	1.378	0.941	1.156	0.981	1.282	0.88	0.783	0.763	1.428	3.402	0.703	0.941	0.823	0.956	1.138	1.058	0.845	1.086	1.311	1.067	1.184	1.816	1.272	0.497	1.317	1.09003	0.522176	nosig	Fructose-bisphosphate aldolase A OS=Homo sapiens OX=9606 GN=ALDOA PE=1 SV=2	ALDOA
P04083	1.518	1.497	1.248	1.381	1.242	1.541	1.528	1.361	1.678	1.661	1.257	1.021	1.41	0.872	0.664	1.267	1.226	0.385	1.291	0.665	0.842	1.208	1.44	0.812	1.394	1.28	1.232	1.251	1.039	1.365	0.747902	0.000107709	down	Annexin A1 OS=Homo sapiens OX=9606 GN=ANXA1 PE=1 SV=2	ANXA1
P04085	1.464	1.996	1.491	2.324	1.373	1.434	0.855	1.715	1.889	1.817	0.886	0.355	0.322	1.725	0	0.498	1.089	1.027	3.186	0.593	0.444	0.114	0	0.641	1.413	1.051	0	0	0.9	1.463	0.480101	0.00047481	down	Platelet-derived growth factor subunit A OS=Homo sapiens OX=9606 GN=PDGFA PE=1 SV=1	PDGFA
P04114	1.397	1.372	1.157	1.028	1.164	1.511	1.291	1.21	1.118	1.175	1.431	1.436	1.465	0.936	1.132	1.198	1.586	0.562	1.229	0.527	0.985	0.832	1.401	1.27	1.283	1.014	1.27	1.058	1.692	1.679	0.965387	0.6237	nosig	Apolipoprotein B-100 OS=Homo sapiens OX=9606 GN=APOB PE=1 SV=2	APOB
P04155	1.775	2.521	0	0.917	0.682	1.69	0.581	0.461	0.873	2.042	0.601	0	0.668	1.488	0.577	1.72	1.451	1.272	0.705	0.7	0.772	1.288	2.301	0.741	0.664	0.544	2.566	2.261	0.461	0.698	0.930428	0.791193	nosig	Trefoil factor 1 OS=Homo sapiens OX=9606 GN=TFF1 PE=1 SV=1	TFF1
P04179	0.247	0	0.291	0.531	0.946	0.174	0.169	0.646	0.598	1.282	0.16	0.323	0.416	2.258	3.641	0.683	0.148	4.329	0.192	3.103	0.429	2.255	0.976	0.23	0.26	0.284	0.065	0.132	1.2	0.379	2.19728	0.0782589	nosig	Superoxide dismutase [Mn], mitochondrial OS=Homo sapiens OX=9606 GN=SOD2 PE=1 SV=3	SOD2
P04180	1.389	2.081	1.565	1.695	1.675	1.644	1.833	1.708	1.621	1.362	1.399	0.972	1.698	1.013	0.863	1.003	1.864	0.154	1.331	0.069	0.895	0.559	1.302	0.655	1.392	1.139	1.431	1.317	1.115	1.281	0.647197	4.56E-05	down	Phosphatidylcholine-sterol acyltransferase OS=Homo sapiens OX=9606 GN=LCAT PE=1 SV=1	LCAT
P04196	1.019	1.461	1.12	1.126	1.39	1.596	1.437	1.052	1.329	1.674	1.813	0.923	1.844	1.678	0.682	1.216	1.355	0.532	1.376	0.21	1.982	0.885	1.511	1.288	1.613	0.876	0.874	0.866	0.961	1.51	0.908626	0.358055	nosig	Histidine-rich glycoprotein OS=Homo sapiens OX=9606 GN=HRG PE=1 SV=1	HRG
P04217	1.376	1.406	1.358	1.131	1.605	1.054	1.219	1.327	1.247	1.192	1.345	1.298	1.744	1.165	0.784	1.298	1.342	0.434	1.284	0.338	1.577	1.043	1.396	1.141	1.445	1.209	1.298	1.308	1.212	1.219	0.924506	0.289676	nosig	Alpha-1B-glycoprotein OS=Homo sapiens OX=9606 GN=A1BG PE=1 SV=4	A1BG
P04264	0.38	0.812	1.818	1.185	1.072	0.791	1.893	0.635	2.571	0.786	0.256	0.583	0.585	0.44	0.341	1.104	0.275	0.899	1.051	0.532	1.587	0.731	0.84	0.684	0.496	11.339	0.604	0.421	0.461	0.725	1.00285	0.995375	nosig	Keratin, type II cytoskeletal 1 OS=Homo sapiens OX=9606 GN=KRT1 PE=1 SV=6	KRT1
P04275	1.125	0.585	0.932	0.663	0.745	0.718	1.072	0.713	0.84	0.863	0.82	1.451	1.628	0.644	1.284	1.074	0.877	1.521	1.296	1.912	1.24	1.932	1.029	0.704	1.185	1.39	0.599	1.299	1.647	0.97	1.48389	0.00062356	up	von Willebrand factor OS=Homo sapiens OX=9606 GN=VWF PE=1 SV=4	VWF
P04406	0.749	0.732	0.973	0.632	1.127	1.207	0.502	1.325	0.766	0.634	0.338	1.028	0.428	1.558	3.74	1.896	0.915	0.358	0.383	1.353	1.367	0.324	1.456	2.153	0.309	2.673	1.668	0.715	0.554	1.797	1.44634	0.094539	nosig	Glyceraldehyde-3-phosphate dehydrogenase OS=Homo sapiens OX=9606 GN=GAPDH PE=1 SV=3	GAPDH
P04424	0.525	0.086	0.011	0.256	0.635	0.045	0.412	0.107	0.102	0.626	0.614	1.815	0.37	6.025	4.68	0.347	0.963	3.283	0.819	2.537	0.345	0.762	0.262	0.823	0.41	0.437	0.126	0.499	0.771	0.167	4.64439	0.0117479	up	Argininosuccinate lyase OS=Homo sapiens OX=9606 GN=ASL PE=1 SV=4	ASL
P04632	0.809	0.946	0.924	1.324	0.88	1.141	0.765	0.972	0.832	0.7	0.881	1.111	0.616	0.943	2.671	0.661	0.83	1.656	0.608	2.039	0.59	0	0.786	1.413	0.843	1.444	1.603	1.004	0.957	1.353	1.18417	0.248488	nosig	Calpain small subunit 1 OS=Homo sapiens OX=9606 GN=CAPNS1 PE=1 SV=1	CAPNS1
P04746	0.626	1.339	1.082	1.49	1.064	0.629	1.399	1.03	1.156	2.011	1.291	0.762	0.815	0.818	0.808	0.767	1.428	1.069	0.516	2.055	0.899	0.772	0.749	0.952	1.036	2.851	0.788	0.909	1.764	0.913	0.928547	0.642156	nosig	Pancreatic alpha-amylase OS=Homo sapiens OX=9606 GN=AMY2A PE=1 SV=2	AMY2A
P04792	1.088	1.322	1.201	1.114	1.198	0.108	1.143	1.2	0.943	0.063	1.333	0.926	0.03	0.937	0.215	1.088	0.889	1.001	1.816	3.065	1.591	0.684	0	0.11	1.228	2.176	1.45	1.187	0.977	0.924	1.15283	0.520941	nosig	Heat shock protein beta-1 OS=Homo sapiens OX=9606 GN=HSPB1 PE=1 SV=2	HSPB1
P05019	0.791	1.445	1.243	1.61	1.366	1.557	2.03	0.331	1.528	1.035	0.942	1.744	0.823	2.219	0.944	0.559	2.229	1.139	0.149	0.2	0.593	0.168	2.61	1.763	1.811	0.655	1.141	1.724	0.921	1.622	0.925943	0.66992	nosig	Insulin-like growth factor I OS=Homo sapiens OX=9606 GN=IGF1 PE=1 SV=1	IGF1
P05023	0.739	0	0.262	0	1.619	0.904	0.143	1.652	0.995	0.594	0.395	0	0.569	1.738	7.491	1.489	0	1.771	0.089	0.461	0	0.076	0.312	0.098	0.06	0	0	0.083	0	0	1.05906	0.924363	nosig	Sodium/potassium-transporting ATPase subunit alpha-1 OS=Homo sapiens OX=9606 GN=ATP1A1 PE=1 SV=1	ATP1A1
P05026	0.857	1.23	0.618	1.209	0.981	0.916	0.795	0.673	1.063	0.783	0.908	1.45	1.11	0.907	2.103	0.953	1.341	1.817	1.896	2.091	0.734	0.682	0.921	0.672	0.718	1.077	0.694	0.965	1.385	0.999	1.28345	0.0476109	nosig	Sodium/potassium-transporting ATPase subunit beta-1 OS=Homo sapiens OX=9606 GN=ATP1B1 PE=1 SV=1	ATP1B1
P05062	0.497	0.741	0.665	0.347	0.58	0.535	0.624	0.99	0.671	0.802	0.766	3.09	0.836	6.567	2.66	0.473	0.92	1.385	0.941	1.45	0.705	0.853	0.626	0.859	0.71	0.897	0.254	0.692	0.96	0.805	2.04967	0.0471556	up	Fructose-bisphosphate aldolase B OS=Homo sapiens OX=9606 GN=ALDOB PE=1 SV=2	ALDOB
P05067	1.265	1.683	1.396	2.578	1.432	1.222	1.009	1.357	1.535	1.892	0.739	0.62	0.614	1.405	0.3	1.208	1.125	1.138	2.652	0.888	1.074	0.945	0.831	0.855	1.021	1.243	0.322	1.024	1.613	0.823	0.664975	0.00921107	down	Amyloid-beta precursor protein OS=Homo sapiens OX=9606 GN=APP PE=1 SV=3	APP
P05106	1.253	1.689	1.368	1.089	1.304	1.566	1.553	1.6	1.389	1.196	1.687	1.527	1.731	1.563	0.53	1.319	1.406	0.306	1.53	0.24	1.009	0.763	1.349	1.181	1.329	1.108	1.085	1.2	1.121	1.454	0.836653	0.0534565	nosig	Integrin beta-3 OS=Homo sapiens OX=9606 GN=ITGB3 PE=1 SV=2	ITGB3
P05109	1.96	1.259	0.98	1.004	0.685	1.448	1.249	2.491	0.644	2.745	0.028	0.732	0.54	0.419	0.47	0.406	0.586	3.21	0.106	2.697	0.976	0.524	0.022	1.196	0.08	1.326	1.075	1.042	0.514	1.264	0.594988	0.0607414	nosig	Protein S100-A8 OS=Homo sapiens OX=9606 GN=S100A8 PE=1 SV=1	S100A8
P05121	0.675	1.779	1.203	6.922	0.295	1.611	0.346	0.363	1.946	1.118	0.059	0.143	0.059	2.347	1.305	0.085	1.357	0.8	2.99	1.555	0.246	0.979	1.022	0.231	0.576	0.477	0	0.102	1.294	1.4	0.52365	0.25676	nosig	Plasminogen activator inhibitor 1 OS=Homo sapiens OX=9606 GN=SERPINE1 PE=1 SV=1	SERPINE1
P05154	0.533	0.836	2.551	1.888	1.168	0.726	2.393	0.761	1.081	1.04	0.897	1.024	1.049	1.572	0.575	0.753	1.095	0.766	1.396	0.637	1.79	1.277	2.624	1.136	1.153	2.091	0.59	0.682	0.897	1.147	0.892001	0.593327	nosig	Plasma serine protease inhibitor OS=Homo sapiens OX=9606 GN=SERPINA5 PE=1 SV=3	SERPINA5
P05156	0.818	1.572	1.486	1.258	1.534	1.667	1.522	1.486	1.525	1.651	1.183	1.407	1.653	1.202	0.894	1.521	1.279	0.591	0.858	0.402	1.005	0.673	1.603	1.098	1.319	1.212	1.059	1.168	1.191	1.089	0.771644	0.00506945	nosig	Complement factor I OS=Homo sapiens OX=9606 GN=CFI PE=1 SV=2	CFI
P05160	1.495	1.09	1.391	0.982	1.401	1.148	1.47	1.266	1.832	1.531	1.496	1.174	0.956	1.208	0.95	0.866	1.338	0.697	1.123	0.441	1.138	1.216	1.389	1.048	1.896	1.06	1.091	1.126	1.417	1.205	0.839152	0.0464692	nosig	Coagulation factor XIII B chain OS=Homo sapiens OX=9606 GN=F13B PE=1 SV=3	F13B
P05164	1.242	1.28	1.002	1.087	0.983	1.403	1.199	1.21	0.956	1.308	1.306	1.579	1.307	0.778	1.057	1.377	1.236	1.13	1.229	1.093	0.936	0.607	1.066	1.742	1.053	0.757	1.063	0.942	1.636	1.586	1.006	0.933896	nosig	Myeloperoxidase OS=Homo sapiens OX=9606 GN=MPO PE=1 SV=1	MPO
P05186	0.845	0.51	0.771	0.172	1.105	0.59	0.72	1.347	0.661	0.576	0.679	0.586	0.456	1.226	0.933	0.823	0.437	6.299	0.629	2.128	0.581	1.146	0.761	1.105	0.962	0.705	0.429	0.718	0.557	1.01	1.51912	0.225429	nosig	Alkaline phosphatase, tissue-nonspecific isozyme OS=Homo sapiens OX=9606 GN=ALPL PE=1 SV=4	ALPL
P05362	0.762	0.756	0.634	0.64	0.637	0.284	0.664	0.508	0.604	0.55	0.769	1.074	1.055	0.878	0.996	1.078	1.191	2.941	1.329	3.152	1.222	1.527	0.868	0.896	1.081	0.663	1.015	0.872	0.769	0.622	1.98692	0.000925571	up	Intercellular adhesion molecule 1 OS=Homo sapiens OX=9606 GN=ICAM1 PE=1 SV=2	ICAM1
P05413	0.93	0.26	0.571	0.315	0.41	0.29	0.704	0.229	0.421	0.623	0.524	1.706	1.873	0.378	1.508	0.918	0.567	1.75	1.363	3.238	1.063	2.714	0.591	0.566	0.964	1.162	0.23	1.251	2.109	0.701	2.64843	0.000410839	up	Fatty acid-binding protein, heart OS=Homo sapiens OX=9606 GN=FABP3 PE=1 SV=4	FABP3
P05451	0	0.643	0.825	1.811	0.188	0.376	0.331	0.2	0	0.736	0.226	1.154	0.567	0.995	2.097	0.458	0.995	1.481	2.069	2.061	1.359	1.951	0.315	0.837	0.971	0.227	0.76	2.797	1.06	1.59	2.3454	0.00743176	up	Lithostathine-1-alpha OS=Homo sapiens OX=9606 GN=REG1A PE=1 SV=3	REG1A
P05452	1.307	1.027	1.242	1.069	1.261	1.106	1.168	1.181	1.094	1.226	1.395	0.95	0.862	1.025	0.907	1.183	1.098	1.147	0.742	0.707	1.767	1.6	1.378	1.121	1.062	1.403	1.049	1.387	1.683	1.132	1.0101	0.871639	nosig	Tetranectin OS=Homo sapiens OX=9606 GN=CLEC3B PE=1 SV=3	CLEC3B
P05455	0.995	0.092	0.829	1.104	0.037	0.537	1.337	0.406	0.096	0	0.982	0.008	0.405	0.062	3.716	0.573	0.054	0.461	0.433	6.042	0.419	0.809	0.262	0.203	0.995	1.095	0.892	0.75	0.878	0.879	1.83306	0.21259	nosig	Lupus La protein OS=Homo sapiens OX=9606 GN=SSB PE=1 SV=2	SSB
P05543	1.527	1.187	0.844	1.13	1.21	1.292	0.973	1.233	1.41	1.832	0.747	1.446	1.886	1.069	0.639	1.717	1.32	0.554	1.132	0.422	1.757	0.654	1.597	1.417	1.275	1.609	1.299	0.81	1.284	1.48	0.954028	0.66241	nosig	Thyroxine-binding globulin OS=Homo sapiens OX=9606 GN=SERPINA7 PE=1 SV=2	SERPINA7
P05546	1.358	2.049	1.84	1.519	1.744	1.765	2.082	1.57	2.008	1.866	1.276	0.896	1.278	1.255	0.495	1.403	1.18	0.269	1.403	0.165	1.136	0.496	1.331	0.88	1.575	1.081	1.018	1.028	1.097	0.992	0.568901	3.98E-07	down	Heparin cofactor 2 OS=Homo sapiens OX=9606 GN=SERPIND1 PE=1 SV=3	SERPIND1
P05556	0.97	0.991	0.881	0.658	0.801	1.372	0.952	0.775	1.139	1.309	1.414	0.987	0.958	0.808	0.452	2.072	1.251	1.424	1.301	1.107	1.12	1.458	1.057	1.599	1.361	1.463	1.66	0.79	1.266	1.241	1.25858	0.0258076	nosig	Integrin beta-1 OS=Homo sapiens OX=9606 GN=ITGB1 PE=1 SV=2	ITGB1
P05976	6.061	1.749	1.399	0.65	1.437	1.61	1.363	1.682	2.071	1.078	0.435	0.547	0.533	1.839	0.998	0.468	0.738	0.164	2.178	0.529	0.857	0.958	0.899	1.124	0.327	0.651	0.1	0.74	2.824	1.098	0.471387	0.0691463	nosig	Myosin light chain 1/3, skeletal muscle isoform OS=Homo sapiens OX=9606 GN=MYL1 PE=1 SV=3	MYL1
P06276	1.674	1.55	1.765	1.083	2.209	1.779	1.698	2.051	1.757	1.242	1.464	1.097	1.393	0.996	0.929	0.598	1.446	0.391	1.123	0.354	0.741	0.643	1.078	1.052	1.823	1.212	1.1	0.677	1.052	1.452	0.613428	0.000107827	down	Cholinesterase OS=Homo sapiens OX=9606 GN=BCHE PE=1 SV=1	BCHE
P06331	1.661	1.047	0.802	1.47	1.428	0.938	1.098	0.991	1.296	0.896	1.017	1.527	1.016	0.901	0.711	1.305	0.978	1.982	1.009	0.91	2.083	0.852	1.113	1.203	1.03	1.309	1	0.892	1.134	1.122	0.993119	0.947246	nosig	Immunoglobulin heavy variable 4-34 OS=Homo sapiens OX=9606 GN=IGHV4-34 PE=1 SV=2	IGHV4-34
P06396	1.282	0.973	1.268	1.378	1.255	1.089	1.386	1.277	1.192	1.287	1.36	0.758	1.004	1.024	0.773	1.124	1.067	1.308	1.003	0.612	1.533	1.426	1.282	0.928	1.349	1.443	1.16	1.218	1.455	1.312	0.934003	0.252821	nosig	Gelsolin OS=Homo sapiens OX=9606 GN=GSN PE=1 SV=1	GSN
P06576	1.678	1.393	1.141	1.335	1.566	2.313	2.208	1.279	2.432	1.116	0.897	0.983	1.74	1.147	0.461	1.757	1.539	0.71	1.471	0	0.73	0.078	1.764	0.464	0.547	1.455	1.335	0.641	0.862	1.899	0.622076	0.00594864	down	ATP synthase subunit beta, mitochondrial OS=Homo sapiens OX=9606 GN=ATP5F1B PE=1 SV=3	ATP5F1B
P06681	1.572	1.668	1.528	1.212	1.383	1.41	1.469	1.36	1.624	1.19	1.321	1.05	1.584	1.238	0.595	1.592	1.143	0.785	1.467	0.495	0.863	0.962	1.377	1.053	1.301	0.967	1.237	0.938	1.044	1.224	0.771226	0.000515847	nosig	Complement C2 OS=Homo sapiens OX=9606 GN=C2 PE=1 SV=2	C2
P06702	1.627	1.619	1.442	1.443	1.405	1.608	1.389	1.715	1.426	1.702	1.339	1.096	1.172	1.139	0.638	1.3	1.344	0.767	1.214	0.537	0.992	0.556	1.176	0.994	1.411	1.072	1.293	1.236	0.912	1.201	0.695532	4.36E-07	down	Protein S100-A9 OS=Homo sapiens OX=9606 GN=S100A9 PE=1 SV=1	S100A9
P06703	1.086	1.084	1.377	1.126	0.395	1.767	0.973	1.435	0.54	0.637	0.312	0.94	1.271	0.46	0.561	1.915	1.218	1.11	0.55	1.469	1.059	2.036	0.627	1.971	0.439	0.927	2.634	1.788	0.496	1.619	1.12294	0.52638	nosig	Protein S100-A6 OS=Homo sapiens OX=9606 GN=S100A6 PE=1 SV=1	S100A6
P06727	0.835	1.192	1.192	0.989	1.129	0.849	1.528	1.135	0.803	1.138	1.171	0.89	0.734	1.111	1.087	0.872	1.117	1.475	1.245	1.395	1.18	1.525	1.291	1.316	1.119	0.935	0.83	1.387	1.561	0.931	1.07377	0.376199	nosig	Apolipoprotein A-IV OS=Homo sapiens OX=9606 GN=APOA4 PE=1 SV=4	APOA4
P06732	1.907	0.491	1.313	0.577	0.874	2.009	1.166	1.156	0.459	0.888	1.156	0.341	0.678	0.615	2.56	0.38	1.308	1.958	0.347	0.441	1.442	1.424	1.572	2.319	0.89	1.541	1.055	1.421	0.966	1.133	1.08612	0.679903	nosig	Creatine kinase M-type OS=Homo sapiens OX=9606 GN=CKM PE=1 SV=2	CKM
P06733	0.947	0.919	0.84	0.6	0.475	1.447	0.911	1.293	0.269	1.035	0.049	0.854	0.741	1.8	2.132	0.782	0.482	1.281	0.376	2.481	0.996	0.528	0.381	1.084	0.551	1.777	3.581	1.27	0.515	1.454	1.32297	0.215433	nosig	Alpha-enolase OS=Homo sapiens OX=9606 GN=ENO1 PE=1 SV=2	ENO1
P06737	2.704	1.201	1.149	1.155	1.013	1.163	0.655	1.047	1.113	1.831	0.993	1.046	1.199	2.617	0.927	1.048	1.218	0.671	0.894	0.831	0.468	1.049	2.081	0.865	1.512	0.958	1.417	1.118	0.828	1.067	0.875106	0.449975	nosig	Glycogen phosphorylase, liver form OS=Homo sapiens OX=9606 GN=PYGL PE=1 SV=4	PYGL
P06744	0.763	1.676	1.326	1.552	1.333	1.37	1.184	1.367	2.242	1.257	0.885	0.906	2.038	1.992	1.62	1.457	1.759	0.602	1.053	0.497	0.707	0.21	1.396	0.404	0.86	1.13	1.123	1.918	0.759	1.231	0.801244	0.113403	nosig	Glucose-6-phosphate isomerase OS=Homo sapiens OX=9606 GN=GPI PE=1 SV=4	GPI
P06756	3.272	0.246	0.392	1.067	0.728	0.534	0.22	0.249	0.262	0.697	0.667	1.782	0.184	0.746	1.365	0.99	0.778	3.485	0.64	2.865	0.985	1.906	0.987	2.124	0.77	0.146	0.792	0.196	0.396	0.217	1.43609	0.359817	nosig	Integrin alpha-V OS=Homo sapiens OX=9606 GN=ITGAV PE=1 SV=2	ITGAV
P06858	2.605	1.368	1.602	2.158	1.361	0.828	1.248	0.889	0.936	0.638	1.225	1.257	0.399	0.597	0.377	1.037	0.305	2.716	1.055	0.916	2.099	1.9	0.959	0.678	1.078	0.568	0.734	1.007	1.109	0.387	0.748295	0.169619	nosig	Lipoprotein lipase OS=Homo sapiens OX=9606 GN=LPL PE=1 SV=1	LPL
P07148	0.901	0.448	0.2	0.563	0.118	0.581	0.438	0.483	0.447	0.349	0.934	1.041	0.807	3.041	2.528	0.437	1.06	1.701	0.929	2.521	0.482	1.855	0.649	0.817	3.079	0.851	0.858	0.942	0.928	0.869	2.90735	0.000225495	up	Fatty acid-binding protein, liver OS=Homo sapiens OX=9606 GN=FABP1 PE=1 SV=1	FABP1
P07225	1.499	1.439	1.483	1.213	1.668	1.57	1.685	1.625	1.596	1.31	1.51	1.09	1.22	1.233	0.741	0.945	1.174	0.79	1.127	0.639	1.056	0.67	1.279	0.906	1.502	1.201	0.893	1.21	1.056	1.227	0.711459	2.91E-06	down	Vitamin K-dependent protein S OS=Homo sapiens OX=9606 GN=PROS1 PE=1 SV=1	PROS1
P07237	1.322	1.205	0.992	2.101	1.1	2.035	1.116	1.011	0.999	0.945	0.82	1.017	1.309	1.019	1.507	1.001	0.964	1.131	0.894	1.729	1.157	0.936	0.94	0.97	0.928	0.804	1.009	0.966	1.11	0.898	0.822899	0.143911	nosig	Protein disulfide-isomerase OS=Homo sapiens OX=9606 GN=P4HB PE=1 SV=3	P4HB
P07307	0	0.855	0.741	0	0	0	0	1.54	1.071	0.936	0.319	0.663	1.983	0	1.21	2.482	0	0.313	2.782	0.375	1.346	0.493	0.765	1.647	0	0	1.465	1.551	0	1.005	1.78874	0.139486	nosig	Asialoglycoprotein receptor 2 OS=Homo sapiens OX=9606 GN=ASGR2 PE=1 SV=2	ASGR2
P07355	0.24	0.164	0.198	0.359	0.192	0.183	0.245	0.141	0.364	0.243	0.214	0.586	0.271	0.389	1.538	1.61	0.184	0.337	0.4	0.983	0.503	0.231	0.718	1.177	0.247	1.295	18.412	0.98	0.472	0.263	6.61443	0.159948	nosig	Annexin A2 OS=Homo sapiens OX=9606 GN=ANXA2 PE=1 SV=2	ANXA2
P07357	1.37	1.545	1.925	1.427	1.406	1.481	1.517	1.522	1.846	1.676	1.3	0.75	1.419	1.124	0.785	1.064	1.198	0.522	1.092	0.283	1.16	0.803	1.662	0.983	1.538	1.082	1.07	1.093	1.225	1.391	0.68546	1.62E-05	down	Complement component C8 alpha chain OS=Homo sapiens OX=9606 GN=C8A PE=1 SV=2	C8A
P07358	1.353	1.727	2.04	1.132	1.515	1.448	1.568	1.606	1.88	1.595	1.412	0.725	1.511	1.231	0.817	0.998	1.203	0.353	1.097	0.277	1.22	0.845	1.597	0.89	1.699	1.013	1.095	1.19	1.156	1.217	0.679085	0.000174792	down	Complement component C8 beta chain OS=Homo sapiens OX=9606 GN=C8B PE=1 SV=3	C8B
P07360	1.311	1.625	2.074	1.177	1.182	1.349	1.535	1.439	1.693	1.564	1.631	0.538	1.662	1.01	0.929	0.922	1.22	0.275	1.111	0.401	1.196	1.089	1.436	1.036	1.572	1.076	1.142	1.307	1.302	1.234	0.738812	0.00316969	down	Complement component C8 gamma chain OS=Homo sapiens OX=9606 GN=C8G PE=1 SV=3	C8G
P07384	1.399	0.945	1	0.875	1.012	1.287	0.967	0.977	0.942	1.041	0.969	1.027	1.161	1.78	2.135	0.822	0.798	1.32	0.853	1.085	1.303	1.154	0.896	0.992	1.189	1.09	1.709	1.027	1.086	1.252	1.13202	0.147165	nosig	Calpain-1 catalytic subunit OS=Homo sapiens OX=9606 GN=CAPN1 PE=1 SV=1	CAPN1
P07437	1.616	0.386	1.861	2.024	0.685	2.465	0.752	1.465	0.902	1.125	0.36	0	0	1.64	1.723	0	0	0.178	1.673	1.26	0	2.229	0.407	0.708	0	0.044	0	0.717	0	0.471	0.429561	0.0102527	down	Tubulin beta chain OS=Homo sapiens OX=9606 GN=TUBB PE=1 SV=2	TUBB
P07451	1.606	1.682	1.932	1.648	2.982	2.078	1.786	2.024	2.009	1.441	1.817	1.291	0.293	0.104	1.761	0.632	0.14	0.532	0.171	0.451	0.623	1.375	1.559	2.146	1.69	1.659	0.341	0.198	0.201	0.447	0.454216	2.61E-05	down	Carbonic anhydrase 3 OS=Homo sapiens OX=9606 GN=CA3 PE=1 SV=3	CA3
P07585	0.312	0.723	0.311	0.564	0.898	0.558	0.839	0.351	0.794	1.001	0.203	0.439	0.446	0.218	4.899	0.623	0.83	3.56	0.702	3.258	0.425	1.385	0	0.359	0.251	0.523	0.142	0.861	0.791	0.423	1.60117	0.223224	nosig	Decorin OS=Homo sapiens OX=9606 GN=DCN PE=1 SV=1	DCN
P07686	0.855	0.564	0.19	0.917	0.891	0.15	0.477	0.561	0.576	0.163	1.391	1.594	1.099	1.824	3.075	1.269	1.106	0.73	0.632	1.151	1.585	2.535	1.194	1.164	0.835	1.658	0.508	1.22	1.96	1.099	2.58505	2.40E-05	up	Beta-hexosaminidase subunit beta OS=Homo sapiens OX=9606 GN=HEXB PE=1 SV=3	HEXB
P07711	2.426	0	0.462	0	0.322	0	0.382	0.313	0.32	0	0.294	0.356	0.371	0.607	5.612	0.598	0.509	3.08	0	2.343	0.706	0.339	0.327	0.668	0	0.415	0.43	0.362	0.263	0.459	2.09929	0.228797	nosig	Procathepsin L OS=Homo sapiens OX=9606 GN=CTSL PE=1 SV=2	CTSL
P07737	0.675	1.17	1.727	1.728	0.381	1.404	1.05	1.255	1.125	0.634	0.107	1.515	0.182	0.639	0.517	0.206	0.253	0.757	0.368	4.452	0.759	2.087	0.365	0.696	0.199	0.247	3.389	0.715	0.512	0.582	0.831779	0.526083	nosig	Profilin-1 OS=Homo sapiens OX=9606 GN=PFN1 PE=1 SV=2	PFN1
P07738	0.458	0.488	0.764	0.61	0.36	1.477	0.726	0.68	0.4	0.938	0.773	1.195	2.066	0.445	4.86	2.926	1.281	0.788	0.681	1.065	1.685	1.496	0.759	1.712	0.399	0.674	1.115	0.571	0.424	1.22	1.89357	0.02378	up	Bisphosphoglycerate mutase OS=Homo sapiens OX=9606 GN=BPGM PE=1 SV=2	BPGM
P07858	0.422	0.769	0.513	0.832	1.185	0.279	0.418	0.497	1.012	1.193	0.783	0.443	0.906	0.738	5.015	0.637	0.654	1.368	1.493	2.141	1.461	2.264	0.452	0.606	0.642	0.66	0.641	0.795	0.946	0.883	1.65225	0.0809792	nosig	Cathepsin B OS=Homo sapiens OX=9606 GN=CTSB PE=1 SV=3	CTSB
P07900	0.405	0.576	1	0.4	0.803	0.733	0.548	1.086	0.686	0.36	0.496	0.555	0.302	1.538	11.664	0.526	0.371	0.567	0.379	0.781	0.222	0.475	0.345	0.455	0.458	0.6	2.313	0.775	0.377	1.036	1.83682	0.341515	nosig	Heat shock protein HSP 90-alpha OS=Homo sapiens OX=9606 GN=HSP90AA1 PE=1 SV=5	HSP90AA1
P07911	0.968	1.448	0.919	1.623	1.117	0.762	1.355	1.282	0.873	1.307	1.181	1.05	1.183	0.759	0.858	1.293	0.803	2.106	1.809	0.898	0.981	1.488	1.255	0.751	1.128	0.929	1.26	1.219	0.962	0.867	0.977347	0.825001	nosig	Uromodulin OS=Homo sapiens OX=9606 GN=UMOD PE=1 SV=1	UMOD
P07942	1.383	1.148	0.838	1.262	0.928	1.717	1.275	1.116	0.957	1.298	1.459	1.413	1.414	0.989	1.111	1.209	1.546	0.591	1.418	0.556	1.229	0.916	1.111	1.116	1.681	1.067	1.148	1.368	1.39	1.575	1.01942	0.828178	nosig	Laminin subunit beta-1 OS=Homo sapiens OX=9606 GN=LAMB1 PE=1 SV=2	LAMB1
P07988	0	0.795	0.465	0	0.315	0.583	0.884	0.598	0.599	0.26	2.059	0.346	0.421	0.781	3.143	0	1.205	0.04	0.459	0	0	2.823	0	1.58	3.758	0.946	0.427	1.224	2.769	0	2.44288	0.0321911	up	Pulmonary surfactant-associated protein B OS=Homo sapiens OX=9606 GN=SFTPB PE=1 SV=3	SFTPB
P07996	1.507	1.236	1.614	1.897	1.341	1.524	1.222	1.735	2.482	1.466	0.856	0.838	0.527	1.184	0.364	0.612	1.105	0.799	2.011	1.069	0.841	1.344	0.624	1.186	0.822	1.202	0.241	0.853	1.756	1.464	0.614641	0.000635965	down	Thrombospondin-1 OS=Homo sapiens OX=9606 GN=THBS1 PE=1 SV=2	THBS1
P07998	0.758	0.543	0.686	0.828	0.729	0.901	0.623	0.732	0.698	1.057	0.562	1.144	0.998	0.675	2.786	1.541	1.119	2.247	0.85	1.951	1.362	1.212	1.247	0.843	0.95	0.92	0.745	1.027	1.244	0.775	1.60146	0.00221586	up	Ribonuclease pancreatic OS=Homo sapiens OX=9606 GN=RNASE1 PE=1 SV=4	RNASE1
P08123	0.422	0.633	0.959	0.726	0.299	0.59	0.06	0.047	0.512	0.708	0.047	0.618	0.439	0.934	7.24	1.456	1.302	1.121	0.449	2.374	0.435	0.547	1.311	0.101	1.293	1.002	0.459	1.226	1.718	1.087	2.53824	0.041724	up	Collagen alpha-2(I) chain OS=Homo sapiens OX=9606 GN=COL1A2 PE=1 SV=7	COL1A2
P08133	0.681	0.649	0.923	2.843	0.708	0.722	0.698	0.707	2.317	0.978	1.674	0.779	1.918	0.64	1.611	0.732	0.642	1.072	0.813	0.883	1.888	0.316	0.66	0.929	2.45	2.069	1.643	0.36	0.542	2.373	1.06868	0.794767	nosig	Annexin A6 OS=Homo sapiens OX=9606 GN=ANXA6 PE=1 SV=3	ANXA6
P08185	1.115	1.235	1.356	1.731	1.405	0.981	1.3	1.022	1.124	1.422	1.548	1.368	1.372	1.645	0.665	1.756	1.646	0.703	1.494	0.496	0.867	0.948	1.293	0.922	1.417	0.943	1.299	1.076	0.978	1.338	0.936648	0.46058	nosig	Corticosteroid-binding globulin OS=Homo sapiens OX=9606 GN=SERPINA6 PE=1 SV=1	SERPINA6
P08236	1.531	0.771	1.461	1.579	1.418	1.611	1.528	1.74	1.807	1.749	0.987	0.98	0.81	1.842	1.052	1.427	1.474	0.407	1.202	0.069	1.067	1.162	1.813	1.021	1.027	1.046	0.945	0.832	2.033	0.813	0.724218	0.00551828	down	Beta-glucuronidase OS=Homo sapiens OX=9606 GN=GUSB PE=1 SV=2	GUSB
P08238	1.254	1.208	1.638	1.14	1.681	1.218	1.066	0.979	1.075	1.379	0.8	0.729	1.118	1.444	2.723	1.71	1.133	0.729	1.066	0.752	0.684	0.594	1.049	1.08	1.566	0.821	1.479	1.348	0.836	0.94	0.894168	0.324212	nosig	Heat shock protein HSP 90-beta OS=Homo sapiens OX=9606 GN=HSP90AB1 PE=1 SV=4	HSP90AB1
P08246	0.29	0.324	0.191	0.341	0.113	0.2	0.245	0.255	0.16	0.363	0.253	3.79	0.677	0.11	0.728	0.414	0.311	1.022	0.199	6.048	0.389	0.775	0.16	5.72	0.301	0.206	1.212	0.423	0.192	1.286	4.87832	0.026858	up	Neutrophil elastase OS=Homo sapiens OX=9606 GN=ELANE PE=1 SV=1	ELANE
P08253	0.668	0.568	0.513	0.772	0.902	0.651	0.772	0.763	0.664	0.731	0.824	0.999	0.769	0.915	2.1	0.952	1.086	2.316	0.883	2.133	0.945	2.165	0.944	1.232	0.866	0.931	0.827	1.152	1.422	0.771	1.72987	0.000367745	up	72 kDa type IV collagenase OS=Homo sapiens OX=9606 GN=MMP2 PE=1 SV=2	MMP2
P08254	1.32	0.458	0.506	0.198	0.706	0.956	1.019	0.625	0.553	0.361	0.694	0.559	0.353	0.368	4.04	1.284	0.42	0.368	0.418	5.376	0.015	0.67	0.466	0.56	0.826	1.013	1.021	0.416	1.205	0.965	1.56946	0.232998	nosig	Stromelysin-1 OS=Homo sapiens OX=9606 GN=MMP3 PE=1 SV=2	MMP3
P08294	0.442	0.166	0.413	0.505	5.657	0.207	2.696	0.167	0.204	1.056	1.621	0.282	0.73	0.329	1.408	0.452	5.143	1.38	0.39	1.62	0.744	1.618	0.4	2.075	0.266	1.827	0.355	0.877	0.88	0.124	0.978068	0.967667	nosig	Extracellular superoxide dismutase [Cu-Zn] OS=Homo sapiens OX=9606 GN=SOD3 PE=1 SV=2	SOD3
P08311	0.742	0.268	0.608	0.782	0.198	0.782	0.863	0.827	0.309	0.694	0.092	2.757	0.686	0.215	0.645	1.114	0.33	1.577	0.899	3.811	1.744	0.293	0.668	3.058	0.521	0.533	1.561	0.476	0.386	2.861	1.99465	0.0282725	up	Cathepsin G OS=Homo sapiens OX=9606 GN=CTSG PE=1 SV=2	CTSG
P08319	0.783	0.653	0.355	0.366	0.332	0.315	0.231	0.362	0.348	0.513	0.987	3.068	0.276	17.463	0.548	0.236	0.956	0.507	0	0.23	0.62	0.167	0.269	0.832	0.288	1.095	0.676	0.806	0.586	0.478	3.53311	0.221629	nosig	All-trans-retinol dehydrogenase [NAD(+)] ADH4 OS=Homo sapiens OX=9606 GN=ADH4 PE=1 SV=5	ADH4
P08514	1.179	0.959	1.912	2.224	1.026	1.206	0.926	1.578	1.659	1.11	0.319	0.846	0.366	2.732	0.412	0.431	0.588	1.384	1.957	0.81	0.716	2.716	0.991	1.43	0.473	0.505	0.499	0.863	2.141	0.697	0.75753	0.142907	nosig	Integrin alpha-IIb OS=Homo sapiens OX=9606 GN=ITGA2B PE=1 SV=3	ITGA2B
P08519	2.42	0.512	0.944	1.16	0.538	0.972	0.607	0.865	0.752	1.217	1.037	0.952	1.728	1.008	0.847	3.507	1.205	0.954	0.769	0.439	0.903	2.608	2.513	0.495	1.077	0.798	1.154	1.852	0.781	0.783	1.27215	0.285583	nosig	Apolipoprotein(a) OS=Homo sapiens OX=9606 GN=LPA PE=1 SV=1	LPA
P08567	0.711	0	0.07	1.17	0.52	0	0.642	1.077	0.762	0.93	0	1.816	0	0.781	0.105	0	0	0.845	0.588	4.118	0.534	1.194	0.347	0.945	0.206	0	1.916	0.19	0.809	0	1.22356	0.618552	nosig	Pleckstrin OS=Homo sapiens OX=9606 GN=PLEK PE=1 SV=3	PLEK
P08571	1.048	1.16	1.037	1.252	1.495	1.183	1.234	0.915	1.606	1.292	1.347	1.296	1.011	1.118	0.869	1.468	1.274	1.467	1.545	0.866	1.239	0.973	1.342	0.915	1.23	0.968	1.096	1.127	0.933	0.945	0.942113	0.397119	nosig	Monocyte differentiation antigen CD14 OS=Homo sapiens OX=9606 GN=CD14 PE=1 SV=2	CD14
P08575	0.724	0.643	0.234	0.383	0.57	0.354	0.724	0.614	0.097	0.673	1.234	0.872	0.843	1.281	0.715	1.172	1.4	3.669	1.538	2.92	0.599	1.356	1.054	1.215	0.496	1.092	1.048	0.682	0.833	0.957	2.48963	0.000442216	up	Receptor-type tyrosine-protein phosphatase C OS=Homo sapiens OX=9606 GN=PTPRC PE=1 SV=3	PTPRC
P08581	1.191	1.122	1.118	1.841	1.188	1.035	1.036	0.992	0.963	0.593	1.747	0.931	1.259	0.78	1.817	0.915	1.452	0.701	1.806	1.491	1.182	1.381	0.919	1.284	1.165	0.662	0.911	0.965	0.693	1.061	1.04351	0.709666	nosig	Hepatocyte growth factor receptor OS=Homo sapiens OX=9606 GN=MET PE=1 SV=4	MET
P08590	2.577	0.934	0	0.283	0.831	0.393	0.207	1.343	0.228	0.636	0.296	0	1.615	0	2.1	0.905	0	1.02	0	0.235	0	0.12	9.79	1.405	1.158	0.219	0.54	0	0.88	0.166	1.37574	0.60884	nosig	Myosin light chain 3 OS=Homo sapiens OX=9606 GN=MYL3 PE=1 SV=3	MYL3
P08603	1.438	1.402	1.523	1.059	1.302	1.395	1.37	1.49	1.279	1.414	1.19	1.146	1.25	1.114	0.904	1.331	1.285	0.85	1.255	0.594	0.98	0.969	1.421	0.975	1.471	1.23	1.04	1.148	1.109	1.308	0.82541	0.00076498	nosig	Complement factor H OS=Homo sapiens OX=9606 GN=CFH PE=1 SV=4	CFH
P08648	0.06	0.648	0.131	0.331	0.185	0	0.1	0.172	0.139	0.08	1.344	0.277	0.319	1.751	0.38	0.852	0.65	2.258	0.229	4.917	0.519	3.653	0	0.316	0.165	0.635	0.465	0	1.446	0	5.46479	0.0110358	up	Integrin alpha-5 OS=Homo sapiens OX=9606 GN=ITGA5 PE=1 SV=2	ITGA5
P08670	1.275	1.147	0.736	0.818	0.855	0.957	0.752	1.114	0.931	0.854	1.315	0.73	0.741	0.634	1.312	0.836	0.943	1.096	0.94	1.425	0.632	0.935	1.035	1.112	1.005	1.7	4.624	1.97	0.707	0.691	1.29161	0.191666	nosig	Vimentin OS=Homo sapiens OX=9606 GN=VIM PE=1 SV=4	VIM
P08697	1.105	1.652	1.015	1.82	1.339	1.427	1.394	1.146	0.892	1.247	1.616	1.127	1.28	1.417	0.778	1.2	1.83	0.888	1.1	0.401	1.311	0.806	1.319	1.061	1.593	1.296	1.257	1.121	0.817	1.285	0.901396	0.282758	nosig	Alpha-2-antiplasmin OS=Homo sapiens OX=9606 GN=SERPINF2 PE=1 SV=3	SERPINF2
P08709	1.454	0.832	1.998	0.237	0.658	0.295	2.353	1.76	1.966	2.083	0.611	1.778	1.592	1.858	0.114	1.674	2.746	0.013	1.994	0.098	1.359	0.207	0.664	0.375	1.509	1.322	1.816	1.205	1.768	1.848	0.900227	0.660399	nosig	Coagulation factor VII OS=Homo sapiens OX=9606 GN=F7 PE=1 SV=1	F7
P08729	0.257	0.58	1.153	1.061	0.794	0.614	3.978	0.304	4.102	0.628	0.877	0.434	0.339	0.483	1.066	0.653	0.17	0.388	0.779	1.008	1.024	0.607	1.115	0.505	0.495	10.36	0.317	0.625	0.372	0.59	0.824252	0.727109	nosig	Keratin, type II cytoskeletal 7 OS=Homo sapiens OX=9606 GN=KRT7 PE=1 SV=5	KRT7
P08779	0.664	0.539	0.916	1.28	0.976	0.532	3.78	0.429	3.835	0.713	0.32	0.363	0.371	0.497	0.346	0.388	0.264	0.827	0.669	1.162	0.711	0.749	1.014	0.584	0.54	9.882	0.434	1.347	0.411	0.772	0.792264	0.653436	nosig	Keratin, type I cytoskeletal 16 OS=Homo sapiens OX=9606 GN=KRT16 PE=1 SV=4	KRT16
P08833	0.504	0	0	0.714	1.506	0	0	0	1.024	1.289	0.333	0.505	0.68	1.214	2.482	2.289	0.012	1.301	2.665	1.17	0.102	3.891	0.846	0.688	0	0.173	0.148	0.468	0.709	0.136	1.96665	0.119592	nosig	Insulin-like growth factor-binding protein 1 OS=Homo sapiens OX=9606 GN=IGFBP1 PE=1 SV=1	IGFBP1
P08865	1.969	1.929	2.287	1.227	0.917	1.343	1.837	0.438	0.355	1.544	1.298	0.692	1.809	0.89	1.546	0.751	0.962	1.186	1.265	1.22	0.689	1.269	1.428	0.935	0.99	0.409	0.514	1.184	1.252	0.728	0.758956	0.160142	nosig	40S ribosomal protein SA OS=Homo sapiens OX=9606 GN=RPSA PE=1 SV=4	RPSA
P09105	0	2.256	0.976	0.505	0.796	0	0	0.939	1.324	0	0.962	0.839	0.77	0	1.636	0.603	0	0.389	0	0.666	0	1.414	0	2.908	1.147	0	0	0	0.972	0	0.905386	0.826767	nosig	Hemoglobin subunit theta-1 OS=Homo sapiens OX=9606 GN=HBQ1 PE=1 SV=2	HBQ1
P09172	1.472	1.369	1.196	0.472	0.968	1.461	2.686	2.408	2.324	1.879	0.991	1.114	1.269	0.526	1.235	0.356	0.202	1.364	0.006	2.068	0.468	0.733	0.421	1.068	0.931	1.29	0.905	0.784	0.501	1.486	0.545673	0.00986101	down	Dopamine beta-hydroxylase OS=Homo sapiens OX=9606 GN=DBH PE=1 SV=3	DBH
P09382	1.564	1.017	0.787	1.035	1.307	0.987	1.128	1.331	0.805	1.07	1.704	0.262	1.121	0.887	1.182	0.355	0.167	2.165	1.295	1.617	0.914	1.195	0.968	0.301	1.467	0.632	1.857	1.203	1.217	1.767	1.0097	0.942737	nosig	Galectin-1 OS=Homo sapiens OX=9606 GN=LGALS1 PE=1 SV=2	LGALS1
P09486	1.171	1.699	1.874	2.418	1.547	1.691	0.901	1.72	1.563	1.66	1.284	0.594	0.364	1.774	0.521	0.383	1.195	0.629	2.325	0.996	0.702	1.038	0.706	1.082	1.194	1.06	0.331	0.738	1.811	1.045	0.608594	0.0012331	down	SPARC OS=Homo sapiens OX=9606 GN=SPARC PE=1 SV=1	SPARC
P09497	1.642	1.338	1.027	0.967	1.295	1.524	1.265	1.193	0.975	1.251	1.417	1.199	1.322	1.22	0.832	1.001	1.341	1.356	1.212	0.622	1.712	0	1.227	1.344	1.468	1.244	1.249	1.244	1.207	1.386	0.94586	0.53245	nosig	Clathrin light chain B OS=Homo sapiens OX=9606 GN=CLTB PE=1 SV=1	CLTB
P09525	1.336	1.732	1.032	1.999	1.311	1.454	1.379	1.449	1.359	1.701	1.279	1.09	1.409	0.823	0.706	1.641	1.179	1.006	1.721	0.584	0.836	0.753	0.98	0.982	1.295	0.823	1.36	1.214	0.787	1.108	0.731291	0.00172278	down	Annexin A4 OS=Homo sapiens OX=9606 GN=ANXA4 PE=1 SV=4	ANXA4
P09603	0.723	0.686	0.575	0.062	0.695	0.647	0.591	0.798	0.233	0.118	0.287	1.281	1.015	1.026	3.621	2.087	1.234	2.613	1.165	2.52	1.333	0.243	1.222	1.323	0.692	0.272	0.895	0.237	1.493	0.834	2.47592	0.00155451	up	Macrophage colony-stimulating factor 1 OS=Homo sapiens OX=9606 GN=CSF1 PE=1 SV=2	CSF1
P09619	1.348	1.468	1.531	1.173	1.762	1.473	1.776	1.401	1.661	1.897	1.293	1.19	1.399	1.047	0.489	0.909	1.378	0.738	0.999	0.299	1.175	0.483	1.794	1.139	1.281	1.253	1.174	1.04	1.385	1.377	0.705036	0.000232426	down	Platelet-derived growth factor receptor beta OS=Homo sapiens OX=9606 GN=PDGFRB PE=1 SV=1	PDGFRB
P09622	1.555	1.295	1.335	1.135	1.175	1.233	1.183	1.237	1.217	1.069	1.132	0.84	0.986	1.091	0.992	0.974	0.59	1.851	1.015	0.879	1.269	1.15	1.388	0.942	1.534	1.104	0.831	1.004	1.562	1.258	0.900434	0.123006	nosig	Dihydrolipoyl dehydrogenase, mitochondrial OS=Homo sapiens OX=9606 GN=DLD PE=1 SV=2	DLD
P09668	1.286	1.415	1.285	1.268	1.28	1.118	0.972	1.216	1.424	1.544	1.551	1.406	1.151	0.869	0.914	1.431	1.306	0.919	2.126	0.647	0.708	1.282	1.049	1.08	1.327	1.127	1.055	1.355	0.63	1.113	0.899672	0.178474	nosig	Pro-cathepsin H OS=Homo sapiens OX=9606 GN=CTSH PE=1 SV=4	CTSH
P09871	1.49	1.404	1.247	1.534	1.31	1.337	1.521	1.399	1.366	1.367	0.987	1.16	1.248	0.858	0.76	1.443	0.938	1.139	1.351	0.688	1.053	1.03	1.212	1.226	1.308	0.956	1.317	1.025	1.134	1.035	0.782397	4.03E-06	nosig	Complement C1s subcomponent OS=Homo sapiens OX=9606 GN=C1S PE=1 SV=1	C1S
P09958	1.356	1.933	1.002	1.321	0	0.979	0.872	1.013	1.803	1.479	1.137	1.698	1.19	1.195	0	0.953	1.131	0	1.789	0	0	1.174	0	0	1.096	1.482	0	1.15	0.975	1.208	0.687957	0.117137	nosig	Furin OS=Homo sapiens OX=9606 GN=FURIN PE=1 SV=2	FURIN
P09960	0.66	0.86	0.718	0.643	0.478	1.009	0.617	0.913	0.705	0.734	0.658	1.03	0.839	1.331	2.549	1.387	0.799	0.276	0.877	1.502	0.539	0.687	1.107	1.298	0.978	1.068	6.546	0.975	0.81	0.908	1.78302	0.0686421	nosig	Leukotriene A-4 hydrolase OS=Homo sapiens OX=9606 GN=LTA4H PE=1 SV=2	LTA4H
P0C0L4	1.64	1.149	1.245	1.037	1.063	2.523	1.336	1.253	1.65	1.338	1.318	1.227	1.678	1.029	0.585	1.749	1.248	0.436	1.798	0.457	0.779	0.574	1.483	1.008	0.992	1.211	1.674	1.148	1.125	1.333	0.802726	0.112106	nosig	Complement C4-A OS=Homo sapiens OX=9606 GN=C4A PE=1 SV=2	C4A
P0C862	0.563	0.381	0	0.455	0.134	0	0	0	0	0.624	0.65	0	0	0.588	0.605	0	0	5.456	0	0.313	0	2.46	0.483	0.11	0	0	0	0	0.341	0.161	2.58855	0.262855	nosig	Complement C1q and tumor necrosis factor-related protein 9A OS=Homo sapiens OX=9606 GN=C1QTNF9 PE=1 SV=1	C1QTNF9
P0DJD7	1.254	0.788	0.942	1.197	0.87	0.903	1.041	1.048	0.829	1.241	1.065	0.658	0.62	0.747	2.433	0.972	0.935	1.679	1.119	0.919	1.387	1.067	1.229	1.593	1.435	1.302	1.017	1.624	1.061	0.955	1.17754	0.110646	nosig	Pepsin A-4 OS=Homo sapiens OX=9606 GN=PGA4 PE=1 SV=1	PGA4
P0DJI8	0.341	0.779	1.904	0.311	0.443	0.642	0.417	0.735	0.473	0.385	0.413	0.677	1.508	2.065	2.096	9.63	0.458	0.775	4.006	1.683	0.199	0.435	0.693	0.409	0.216	0.202	0.247	0.353	0.54	0.634	2.11812	0.168952	nosig	Serum amyloid A-1 protein OS=Homo sapiens OX=9606 GN=SAA1 PE=1 SV=1	SAA1
P0DOY2	0.396	1.347	0.847	1.064	1.415	0.956	0.999	1.027	1.342	0.957	0.714	1.132	0.451	0.687	0.575	0.876	0.462	4.019	0.987	1.779	1.298	1.378	0.867	0.791	0.801	1.271	0.618	0.837	1.247	0.695	1.03792	0.843224	nosig	Immunoglobulin lambda constant 2 OS=Homo sapiens OX=9606 GN=IGLC2 PE=1 SV=1	IGLC2
P0DP03	1.147	0.95	0.78	1.825	1.37	0.939	0.946	0.606	1.741	0.592	0.618	1.003	0.503	0.905	0	0.847	0.385	3.553	0.725	1.376	2.115	0	0.662	0	1.047	1.447	0.886	0.847	0.701	0	0.808554	0.371764	nosig	Immunoglobulin heavy variable 3-30-5 OS=Homo sapiens OX=9606 GN=IGHV3-30-5 PE=3 SV=1	IGHV3-30-5
P0DP23	0.978	0.973	0.843	0.845	0.375	0.811	0.299	0.871	0.356	0.62	0.388	1.231	0.388	0.564	2.522	0.666	0.327	1.609	0.49	4.092	0.785	1.395	0.234	1.193	0.544	0.645	2.887	0.72	0.587	0.471	1.55917	0.116945	nosig	Calmodulin-1 OS=Homo sapiens OX=9606 GN=CALM1 PE=1 SV=1	CALM1
P0DPA2	2.469	0.955	0.955	1.21	0.277	1.957	1.183	1.197	0.242	1.147	1.48	1.134	1.559	0.53	5.772	2.003	0.963	0.766	0.191	0	0.525	0.676	0.143	0	0.378	0.091	1.468	1.33	0.741	1.163	0.902045	0.74939	nosig	V-set and immunoglobulin domain-containing protein 8 OS=Homo sapiens OX=9606 GN=VSIG8 PE=2 SV=1	VSIG8
P0DPH7	1.514	1.377	1.93	0.607	0.527	2.192	1.834	0.642	1.079	0.743	1.73	1.307	2.118	0.857	1.778	0.179	1.76	0.484	0.373	1.048	1.87	1.182	0.062	1.351	0.83	0.783	1.458	0.439	1.697	1.622	0.921173	0.684665	nosig	Tubulin alpha-3C chain OS=Homo sapiens OX=9606 GN=TUBA3C PE=1 SV=1	TUBA3C
P10124	1.207	1.694	1.833	2.622	1.112	1.579	0.865	1.238	2.232	1.796	0.853	0.485	0.417	2.121	0.304	0.799	0.948	0.536	3.063	1.205	1.045	1.221	0.763	0.885	0.918	0.997	0.089	0.707	1.553	0.644	0.604308	0.00969115	down	Serglycin OS=Homo sapiens OX=9606 GN=SRGN PE=1 SV=3	SRGN
P10153	0.797	0.918	0.84	1.492	0.682	0.893	0.821	0.79	0.876	1.039	0.433	1.327	0.858	0.66	1.361	0.946	0.763	1.254	1.49	2.903	1.541	0.717	0.792	2.381	0.775	1.029	0.823	0.737	1.056	0.757	1.23541	0.167969	nosig	Non-secretory ribonuclease OS=Homo sapiens OX=9606 GN=RNASE2 PE=1 SV=2	RNASE2
P10451	0.672	0.184	0	0	0.029	0	0	0	0.273	0.141	0.137	0.465	0.799	0.159	6.837	1.291	0	2.196	1.035	2.235	0.644	0.039	0.447	0.813	0.14	0.624	0.032	0.844	0.76	0	7.50462	0.0243599	up	Osteopontin OS=Homo sapiens OX=9606 GN=SPP1 PE=1 SV=1	SPP1
P10586	1.58	1.935	1.622	1.427	1.668	1.564	1.813	1.88	1.825	1.303	1.158	0.953	1.275	1.193	1.023	0.975	1.532	0.574	1.335	0.231	0.817	0.375	1.227	0.771	1.624	1.051	1.119	1.236	0.973	1.41	0.62743	1.87E-06	down	Receptor-type tyrosine-protein phosphatase F OS=Homo sapiens OX=9606 GN=PTPRF PE=1 SV=2	PTPRF
P10599	1.023	0.302	0.576	0.254	0.843	1.019	1.38	0.252	0.606	0.917	0.251	1.419	0	0	1.423	1.543	0.183	1.456	0.229	2.924	1.215	2.493	0.632	1.717	0.616	1.944	0.341	0.333	0	1.199	1.38859	0.232566	nosig	Thioredoxin OS=Homo sapiens OX=9606 GN=TXN PE=1 SV=3	TXN
P10619	0.683	0.336	0.738	0.885	0.366	0.194	0.279	0.87	0.506	0	0.291	0.838	0.419	2.32	0.728	0.782	0.932	4.115	1.009	2.499	0.767	1.912	0.706	1.128	0	0.378	0.235	0.697	2.217	0.487	2.31213	0.0150434	up	Lysosomal protective protein OS=Homo sapiens OX=9606 GN=CTSA PE=1 SV=2	CTSA
P10643	0.679	0.755	0.476	1.215	0.838	0.571	0.693	0.797	0.832	0.871	0.99	1.458	0.949	1.099	1.462	1.208	1.061	2.886	0.837	2.313	1.155	0.91	1.138	0.649	0.888	1.134	0.826	0.688	1.168	0.93	1.53675	0.00495299	up	Complement component C7 OS=Homo sapiens OX=9606 GN=C7 PE=1 SV=2	C7
P10645	1.272	0.49	0.534	0.71	0.759	1.127	0.38	0.562	1.231	1.378	1.223	0.63	0.944	0.403	2.013	0.794	0.537	2.648	0.71	1.143	1.35	2.449	0.538	1.469	1.912	0.558	1.015	2.032	1.185	0.425	1.41999	0.0774048	nosig	Chromogranin-A OS=Homo sapiens OX=9606 GN=CHGA PE=1 SV=7	CHGA
P10646	1.317	1.636	0	1.125	0.632	1.457	0.663	0.631	0.345	1.478	1.224	0.392	1.107	1.172	3.866	0.484	0	1.785	1.458	0	0.381	0.876	1.009	0.466	1.397	1.409	1.118	1.132	1.211	1.242	1.17024	0.537137	nosig	Tissue factor pathway inhibitor OS=Homo sapiens OX=9606 GN=TFPI PE=1 SV=1	TFPI
P10721	0.269	1.078	0.855	1.032	1.623	1.116	0.771	0.688	0.67	0.996	1.527	0.42	0.695	0.832	0.504	0.723	0.949	2.642	0.729	1.285	1.042	3.065	1.029	1.226	1.127	1.486	1.321	0.754	1.43	0.919	1.30276	0.147279	nosig	Mast/stem cell growth factor receptor Kit OS=Homo sapiens OX=9606 GN=KIT PE=1 SV=1	KIT
P10909	1.395	1.62	1.506	1.436	1.523	1.671	1.569	1.596	1.68	1.281	1.171	1.154	1.297	1.197	0.699	1.322	1.453	0.479	1.156	0.284	0.992	0.57	1.638	1.263	1.246	1.321	1.253	1.156	1.215	1.161	0.72092	3.28E-05	down	Clusterin OS=Homo sapiens OX=9606 GN=CLU PE=1 SV=1	CLU
P10912	0.694	1.611	0.972	0	0.822	3.622	1.873	1.426	1.59	0.711	0	0.49	1.138	1.094	1.199	1.149	1.762	1.302	0	0.714	0	0.368	0	0	0	0	0	0.577	0.685	0	0.393289	0.0326798	down	Growth hormone receptor OS=Homo sapiens OX=9606 GN=GHR PE=1 SV=1	GHR
P10915	1.069	1.111	1.254	0.956	1.125	0.626	1.188	1.006	1.283	1.181	0.732	0.742	0.925	0.654	1.916	0	0.801	2.749	0.727	0.711	0.679	0.709	1.795	1.915	1.803	1.379	0.581	1.379	1.081	0.742	1.01954	0.894142	nosig	Hyaluronan and proteoglycan link protein 1 OS=Homo sapiens OX=9606 GN=HAPLN1 PE=2 SV=2	HAPLN1
P10916	0.068	1.039	1.401	0.265	0.091	1.177	1.371	1.546	0.049	0.339	1.226	0.85	0.175	0.63	1.45	0.073	0.978	0.822	0.573	0.685	0.04	1.302	14.989	0.087	0.093	1.982	0.076	0.501	1.018	1.464	1.97482	0.350076	nosig	Myosin regulatory light chain 2, ventricular/cardiac muscle isoform OS=Homo sapiens OX=9606 GN=MYL2 PE=1 SV=3	MYL2
P11021	1.104	1.371	1.868	1.19	1.5	1.171	1.484	1.201	1.066	1.429	1.021	1.075	1.161	1.354	1.237	1.353	1.239	0.73	1.468	0.538	0.998	1.026	1.285	1.198	1.315	1.302	1.339	0.998	0.865	1.241	0.849634	0.0446937	nosig	Endoplasmic reticulum chaperone BiP OS=Homo sapiens OX=9606 GN=HSPA5 PE=1 SV=2	HSPA5
P11047	1.17	1.141	0.929	1.755	1.25	1.233	1.44	1.245	1.158	1.686	1.627	1.003	1.289	0.996	1.465	0.799	1.466	0.54	1.143	0.672	1.175	1.284	1.075	0.784	1.946	1.068	1.205	1.391	1.016	0.928	0.879219	0.167303	nosig	Laminin subunit gamma-1 OS=Homo sapiens OX=9606 GN=LAMC1 PE=1 SV=3	LAMC1
P11142	0.902	0.607	0.961	0.637	0.583	2.329	1.054	1.027	0.788	0.718	0.799	0.876	0.718	1.194	5.044	1.27	0.596	0.488	0.687	1.656	0.66	0.596	0.583	0.813	1.408	1.267	1.761	1.07	0.586	1.117	1.20701	0.473533	nosig	Heat shock cognate 71 kDa protein OS=Homo sapiens OX=9606 GN=HSPA8 PE=1 SV=1	HSPA8
P11215	0.451	1.187	1.224	1.354	0.27	0.472	0.492	1.54	0.376	0.376	1.043	0.868	0.193	0.398	0.454	0.835	0.433	1.351	0.879	4.79	2.528	2.809	0.476	0.686	0.505	0.358	0.451	0.308	0.591	0.816	1.34151	0.376008	nosig	Integrin alpha-M OS=Homo sapiens OX=9606 GN=ITGAM PE=1 SV=2	ITGAM
P11226	1.143	0.569	0.487	1.334	0.761	0.648	0.696	0.154	0.377	2.905	0.457	1.727	0.351	2.305	0.834	0.391	2.346	0.537	1.742	1.299	1.491	0.821	0.572	0.408	1.537	1.783	1.738	2.806	0.85	1.635	1.41228	0.225143	nosig	Mannose-binding protein C OS=Homo sapiens OX=9606 GN=MBL2 PE=1 SV=2	MBL2
P11233	0	1.25	0	1.185	0.797	0.907	0	1.37	1.391	0	0	1.179	0	1.082	1.459	0.828	0.918	0.662	0.85	1.484	0	0.746	0	0.841	0	0	1.115	1.334	0.926	0	0.972754	0.936306	nosig	Ras-related protein Ral-A OS=Homo sapiens OX=9606 GN=RALA PE=1 SV=1	RALA
P11277	1.776	1.297	1.237	0.11	1.555	1.375	2.073	1.943	2.036	1.623	1.178	1.151	1.18	1.006	0.934	0.9	1.02	1.607	0.326	0.784	0.287	1.753	1.156	1.688	1.191	0.915	1.213	0.986	0.606	0.361	0.673611	0.0304508	down	Spectrin beta chain, erythrocytic OS=Homo sapiens OX=9606 GN=SPTB PE=1 SV=5	SPTB
P11279	0.856	1.04	1.03	1.06	1.081	1.155	1.063	1.01	1.059	0.935	1.305	0.991	1.069	0.713	0.889	1.004	1.446	2.301	0.984	1.461	0.987	1.336	1.136	1.132	1.365	1.112	0.859	0.953	1.268	0.932	1.12951	0.108555	nosig	Lysosome-associated membrane glycoprotein 1 OS=Homo sapiens OX=9606 GN=LAMP1 PE=1 SV=3	LAMP1
P11362	0.491	0.469	0.646	0.296	1.16	0.787	0.935	0.905	0.557	0.701	1.126	0.48	0.726	1.078	0.772	1.219	0.772	2.931	1.022	1.779	1.34	2.28	1.348	1.652	0.933	1.315	1.051	1.286	1.361	0.375	1.78825	0.00153119	up	Fibroblast growth factor receptor 1 OS=Homo sapiens OX=9606 GN=FGFR1 PE=1 SV=3	FGFR1
P11387	1.604	1.375	1.007	1.694	2.001	1.28	1.528	1.232	1.681	1.463	1.937	0.687	0.949	1.442	0.458	0.796	1.871	0.509	0.846	0.195	1.045	0.733	1.971	0.993	2.152	1.64	1.329	1.051	0.696	1.363	0.762294	0.0287018	down	DNA topoisomerase 1 OS=Homo sapiens OX=9606 GN=TOP1 PE=1 SV=2	TOP1
P11597	0.587	0.976	0.64	1.53	0.133	1.323	0.913	0.783	1.713	0.843	2.188	1.196	1.102	0.829	3.841	0.318	1.649	0.937	2.617	0.454	0.46	1.097	0.987	0.488	0.295	1.394	1.21	1.597	1.484	1.085	1.33609	0.200806	nosig	Cholesteryl ester transfer protein OS=Homo sapiens OX=9606 GN=CETP PE=1 SV=2	CETP
P11678	0	1.86	1.78	2.98	0	0.758	0.224	1.305	0	1.898	1.548	0	0	1.218	0	0	1.784	0	0	0.738	1.46	1.153	0.186	0.389	0	0.087	0	1.038	0	0	0.444285	0.119203	nosig	Eosinophil peroxidase OS=Homo sapiens OX=9606 GN=EPX PE=1 SV=2	EPX
P11717	1.184	1.534	1.543	1.357	1.443	1.625	1.429	1.55	1.576	1.399	1.586	1.215	1.171	1.413	0.603	1.126	1.408	0.441	1.47	0.49	0.878	0.753	1.55	1.096	1.482	1.231	0.979	1.312	1.115	1.022	0.763012	0.000462951	down	Cation-independent mannose-6-phosphate receptor OS=Homo sapiens OX=9606 GN=IGF2R PE=1 SV=3	IGF2R
P11766	0	0.321	1.445	0.616	1.014	0.819	0.963	0.861	0.801	0	0.163	1.49	2.104	2.782	1.063	0	3.478	1.448	0	0.836	0	0.804	0.143	0	0.042	0	1.021	0.292	0	2.723	1.34423	0.415079	nosig	Alcohol dehydrogenase class-3 OS=Homo sapiens OX=9606 GN=ADH5 PE=1 SV=4	ADH5
P12109	0.696	0.451	0.421	0.524	0.538	0.633	0.76	0.675	0.471	0.473	0.632	0.984	0.783	0.789	4.776	1.073	0.889	2.108	0.767	2.726	0.601	1.123	0.898	0.677	0.697	0.758	0.737	0.983	1.448	0.644	2.13515	0.0100477	up	Collagen alpha-1(VI) chain OS=Homo sapiens OX=9606 GN=COL6A1 PE=1 SV=3	COL6A1
P12110	0.681	0.515	0.503	0.472	1.077	0.518	0.72	0.575	1.256	0.427	0.747	0.696	0.79	1.674	4.341	1.349	0.684	2.162	0.808	1.524	1	1.367	0.708	0.811	0.851	1.117	0.545	0.908	1.874	0.859	1.83978	0.0122403	up	Collagen alpha-2(VI) chain OS=Homo sapiens OX=9606 GN=COL6A2 PE=1 SV=4	COL6A2
P12111	0.594	0.476	0.42	0.609	0.546	0.478	0.549	0.509	0.472	0.555	1.49	1.041	0.591	1.147	1.486	1.459	1.059	1.544	1.286	2.684	1.301	1.246	3.14	1.014	0.968	0.853	1.001	0.917	1.288	0.899	2.53591	9.89E-06	up	Collagen alpha-3(VI) chain OS=Homo sapiens OX=9606 GN=COL6A3 PE=1 SV=5	COL6A3
P12235	0.533	0.956	0.722	0.555	6.826	0.402	0.613	0.602	0.977	0.813	0.433	0.464	0.91	0.241	0.147	0.309	0.249	0.953	0.346	0.136	0.514	0.084	14.519	0.242	0.665	0.52	0	2.804	0.237	0.385	0.929225	0.923	nosig	ADP/ATP translocase 1 OS=Homo sapiens OX=9606 GN=SLC25A4 PE=1 SV=4	SLC25A4
P12259	1.118	1.747	1.645	1.156	1.419	1.363	1.475	1.382	1.389	1.269	1.51	1.38	1.661	1.335	0.686	1.276	1.532	0.239	1.279	0.286	1.444	0.912	1.387	1.134	1.372	1.182	1.081	1.153	1.229	1.238	0.834921	0.0361314	nosig	Coagulation factor V OS=Homo sapiens OX=9606 GN=F5 PE=1 SV=4	F5
P12724	0.49	0.891	0	2.315	0.005	2.972	1.127	0.804	0	1.379	0	2.374	0	0	0.105	0.002	0.696	1.236	0.965	1.279	1.097	0.145	0	3.533	1.125	1.077	0.724	0	0.886	0.922	0.809676	0.620223	nosig	Eosinophil cationic protein OS=Homo sapiens OX=9606 GN=RNASE3 PE=1 SV=2	RNASE3
P12814	1.386	1.12	1.568	1.443	1.396	1.564	1.539	2.08	0.732	1.167	0.519	0.371	0.318	1.407	0.444	0.4	0.315	1.124	0.75	2.355	0.798	0.956	2.139	0.867	0.225	0.427	3.457	0.657	0.577	1.298	0.693248	0.0568112	nosig	Alpha-actinin-1 OS=Homo sapiens OX=9606 GN=ACTN1 PE=1 SV=2	ACTN1
P12882	33.211	0.452	0.321	0.264	0.243	0.032	0.013	0.162	0.264	0.295	0.054	0.5	0.365	0.243	0.041	0.238	0.403	0.201	0.032	0.026	0.164	0.224	0.477	0.23	0.193	0.167	0.123	0.223	0.204	0.274	0.0621437	0.342345	nosig	Myosin-1 OS=Homo sapiens OX=9606 GN=MYH1 PE=1 SV=3	MYH1
P12883	6.932	0.396	0.303	0.634	0.328	0.554	0.429	0.385	0.364	0.711	0.226	0.207	0.308	0.28	0.916	0.313	0.305	1.355	0.542	0.51	0.325	0.491	17.589	0.361	0.531	0.467	0.357	0.254	0.337	0.369	1.17991	0.855051	nosig	Myosin-7 OS=Homo sapiens OX=9606 GN=MYH7 PE=1 SV=5	MYH7
P12931	1.036	1.593	1.556	1.591	1.428	1.118	1.334	1.203	1.352	1.428	1.652	1.092	1.048	1.439	0.488	1.26	1.5	0.282	1.47	0.043	1.081	1.698	1.412	1.288	1.036	1.457	1.275	1.323	1.411	1.307	0.863773	0.119304	nosig	Proto-oncogene tyrosine-protein kinase Src OS=Homo sapiens OX=9606 GN=SRC PE=1 SV=3	SRC
P13473	0.955	1.088	0.859	1.117	1.493	1.065	1.25	1.092	1.324	1.438	0.885	1.053	1.093	2.229	0.858	1.715	1.699	1.736	1.264	1.192	0.727	0.827	1.385	0.632	1.027	0.789	0.91	0.82	1.327	0.809	0.98352	0.867464	nosig	Lysosome-associated membrane glycoprotein 2 OS=Homo sapiens OX=9606 GN=LAMP2 PE=1 SV=2	LAMP2
P13489	0.249	1.009	0.83	0.649	0.425	2.48	0.452	1.19	0.51	0.759	0.454	0.874	0.835	1.206	0.992	1.225	1.499	0.098	0.579	0.648	2.066	0.997	0.229	1.151	0.591	5.655	2.788	2.056	0.45	2.653	1.58108	0.162975	nosig	Ribonuclease inhibitor OS=Homo sapiens OX=9606 GN=RNH1 PE=1 SV=2	RNH1
P13497	1.412	1.348	0.862	1.653	1.132	1.26	1.87	1.141	1.241	1.408	1.11	1.47	0.991	1.199	1	1.19	1.625	0.629	1.025	0.489	1.13	0.81	1.507	0.66	1.154	0.912	2.722	1.315	0.893	1.219	0.864786	0.202697	nosig	Bone morphogenetic protein 1 OS=Homo sapiens OX=9606 GN=BMP1 PE=1 SV=2	BMP1
P13501	1.823	0.553	1.595	1.15	1.007	0.842	0.493	0.476	2.667	1.756	2.371	1.121	0.424	1.301	0.101	0.356	1.245	0.509	4.711	1.319	0.706	0.586	0.659	0.571	2.584	1.954	0.354	0.334	0.719	1.582	0.950777	0.855857	nosig	C-C motif chemokine 5 OS=Homo sapiens OX=9606 GN=CCL5 PE=1 SV=3	CCL5
P13533	1.64	1.031	0.572	1.522	1.766	1.341	1.009	1.466	0.727	1.515	0	1.401	1.642	0	0.627	2.229	1.164	0.654	1.67	0.398	0	0.746	2.068	0.705	0	0.901	0	0	1.011	1.711	0.672293	0.0588941	nosig	Myosin-6 OS=Homo sapiens OX=9606 GN=MYH6 PE=1 SV=5	MYH6
P13591	0.996	0.69	0.72	1.097	1.066	0.78	0.819	0.939	0.957	0.946	1.313	0.651	0.781	0.967	0.917	0.949	1.081	2.221	1.248	1.458	0.954	1.913	1.4	1.093	1.54	1.05	1.054	1.198	1.327	1.004	1.33846	0.00333711	up	Neural cell adhesion molecule 1 OS=Homo sapiens OX=9606 GN=NCAM1 PE=1 SV=3	NCAM1
P13611	1.045	0.45	0.461	0.469	0.757	0.62	0.765	0.778	0.611	0.435	0.5	0.34	0.427	0.728	3.497	0.867	0.619	2.297	0.952	4.046	0.824	1.464	0.457	0.505	0.747	0.674	0.625	0.81	0.625	0.766	1.70318	0.0698734	nosig	Versican core protein OS=Homo sapiens OX=9606 GN=VCAN PE=1 SV=3	VCAN
P13639	0.915	1.463	1.249	1.34	1.31	1.361	1.416	1.227	1.273	1.55	1.044	0.718	0.923	0.768	2.287	1.083	0.726	0.762	1.404	0.249	0.735	1.251	0.871	0.666	1.284	2.703	2.325	1.269	0.723	0.888	0.865346	0.25176	nosig	Elongation factor 2 OS=Homo sapiens OX=9606 GN=EEF2 PE=1 SV=4	EEF2
P13645	0.507	1.355	1.861	1.682	1.169	0.935	1.696	0.803	1.764	1.102	0.607	0.615	0.76	0.917	0.55	1.605	0.508	1.66	1.592	0.664	1.734	0.964	1.086	0.924	0.686	4.939	0.542	0.587	0.666	0.859	0.872495	0.539036	nosig	Keratin, type I cytoskeletal 10 OS=Homo sapiens OX=9606 GN=KRT10 PE=1 SV=6	KRT10
P13647	0.374	0.737	1.678	1.029	0.811	0.632	2.591	0.498	2.559	0.738	2.095	0.475	0.333	0.437	1.863	0.713	0.32	0.794	0.817	0.709	0.888	0.663	0.744	0.541	0.545	9.346	0.463	0.987	0.375	0.545	1.01541	0.972332	nosig	Keratin, type II cytoskeletal 5 OS=Homo sapiens OX=9606 GN=KRT5 PE=1 SV=3	KRT5
P13667	0.05	0.888	0.955	1.292	1.42	0.023	1.267	0.036	0.036	1.362	1.396	0.029	2.995	0.999	3.305	0.046	0.706	1.23	2.181	1.948	1.195	0.923	1.385	0.709	0.769	1.508	0.578	0.428	1.053	1.885	1.72384	0.0663716	nosig	Protein disulfide-isomerase A4 OS=Homo sapiens OX=9606 GN=PDIA4 PE=1 SV=2	PDIA4
P13671	1.36	1.695	1.561	1.477	1.754	1.49	1.728	1.305	1.679	1.869	1.025	0.995	1.12	0.877	0.761	1.021	1.272	0.445	1.142	0.302	1.339	0.926	1.598	1.002	1.545	1.132	1.226	1.289	0.935	1.346	0.668991	4.13E-06	down	Complement component C6 OS=Homo sapiens OX=9606 GN=C6 PE=1 SV=3	C6
P13688	0.52	0.972	1.224	0.523	0.793	0.879	1.077	1.111	0.867	0.425	0.718	1.3	1.215	1.655	1.371	1.158	1.368	1.667	1.381	2.664	0.88	0.57	1.071	0.66	1.243	0.939	0.431	1.092	1.388	1.006	1.41682	0.0177156	up	Carcinoembryonic antigen-related cell adhesion molecule 1 OS=Homo sapiens OX=9606 GN=CEACAM1 PE=1 SV=2	CEACAM1
P13716	0.157	0.112	1.213	1.03	0.03	1.663	1.432	0.139	0.158	1.622	0.092	0.601	2.812	0.183	1.75	4.127	0.93	1.926	1.099	1.149	1.368	1.075	0.238	0.983	1.309	1.048	2.568	0.182	0.722	1.915	1.72558	0.0935802	nosig	Delta-aminolevulinic acid dehydratase OS=Homo sapiens OX=9606 GN=ALAD PE=1 SV=1	ALAD
P13727	0.852	0.843	0.086	1.545	0.124	0.218	0.075	0.002	0.075	1.038	1.475	0.097	1.247	1.367	3.116	2.214	1.325	1.473	2.096	1.613	1.631	2.68	0	1.243	1.378	0.082	0.116	1.025	0.539	0.962	2.64296	0.0043381	up	Bone marrow proteoglycan OS=Homo sapiens OX=9606 GN=PRG2 PE=1 SV=2	PRG2
P13796	1.333	1.086	1.278	1.032	1.097	1.193	1.059	1.179	1.048	1.229	1.22	0.937	1.134	1.273	1.506	1.228	0.954	1.143	1.576	1.071	1.467	1.072	0.992	0.831	1.106	1.081	1.61	0.993	0.934	1.039	1.00429	0.934958	nosig	Plastin-2 OS=Homo sapiens OX=9606 GN=LCP1 PE=1 SV=6	LCP1
P13798	0.922	1.371	2.27	0.69	0.755	1.827	1.476	1.905	1.419	1.426	0.284	0.359	2.305	0.179	0.136	2.568	0.623	1.139	2.488	0.967	1.038	1.291	0.353	1.521	0.493	1.084	1.691	0.731	0.94	1.363	0.766411	0.168809	nosig	Acylamino-acid-releasing enzyme OS=Homo sapiens OX=9606 GN=APEH PE=1 SV=4	APEH
P13929	0.501	0.51	1.437	2.375	0	2.795	0	0.742	1.463	2.71	0.695	0.402	0	3.008	1.144	1.127	0	1.623	0.676	0.551	0.66	0	1.003	1.378	0.248	0.987	0.434	0.983	0.594	0	0.618886	0.224178	nosig	Beta-enolase OS=Homo sapiens OX=9606 GN=ENO3 PE=1 SV=5	ENO3
P14151	0.948	1.269	1.019	0.45	1.253	0.894	1.075	0.996	0.987	1.199	1.075	0.639	0.969	1.36	0.865	1.518	1.188	1.154	0.978	1.551	1.609	1.217	1.118	1.458	0.844	1.166	1.693	1.254	1.099	1.208	1.18746	0.0630186	nosig	L-selectin OS=Homo sapiens OX=9606 GN=SELL PE=1 SV=2	SELL
P14174	0.654	0.596	1.11	0.717	0.412	0.909	0.486	0.674	0.543	0.861	0.323	1.784	1.02	1.149	1.399	1.485	0.611	0.09	0.603	3.72	1.068	1.1	0.608	1.535	0.616	0.808	2.71	1.117	0	0.972	1.63157	0.0425332	up	Macrophage migration inhibitory factor OS=Homo sapiens OX=9606 GN=MIF PE=1 SV=4	MIF
P14222	0.895	0	1.018	1.294	1.059	0	0.878	0	0	0.449	0	1.41	0	1.376	0	1.49	1.08	0	1.733	0	1.236	2.019	0.682	1.431	0	1.171	1.188	0.711	1.727	1.173	1.64733	0.123731	nosig	Perforin-1 OS=Homo sapiens OX=9606 GN=PRF1 PE=1 SV=1	PRF1
P14384	0.584	1.147	0.834	0.974	0.904	1.255	1.232	0.857	0.381	1.253	1.336	0.841	0.818	1.35	2.049	0.531	1.154	1.527	0.966	2.241	0.864	1.435	1.236	1.116	0.813	0.798	0.708	1.595	0.896	0.561	1.21192	0.163459	nosig	Carboxypeptidase M OS=Homo sapiens OX=9606 GN=CPM PE=1 SV=2	CPM
P14543	1.198	1.182	1.093	1.259	1.012	1.29	1.181	1.149	1.132	1.16	0.972	0.933	1.009	1.019	2.194	0.879	1.182	1.2	1.194	1.666	0.873	0.868	0.961	0.836	1.095	0.932	0.651	0.91	1.431	1.267	0.946809	0.451163	nosig	Nidogen-1 OS=Homo sapiens OX=9606 GN=NID1 PE=1 SV=3	NID1
P14550	1.146	1.344	0.907	1.241	0.779	1.271	1.43	1.403	4.135	1.315	1.183	1.354	1.205	1.551	0.808	1.357	1.446	0.497	0.881	0.33	1.619	0.684	1.417	0	1.236	1.013	0.889	1.094	1.281	1.169	0.701824	0.184648	nosig	Aldo-keto reductase family 1 member A1 OS=Homo sapiens OX=9606 GN=AKR1A1 PE=1 SV=3	AKR1A1
P14625	1.449	1.388	1.268	1.082	1.542	1.159	1.105	0.971	1.228	1.608	0.816	1.318	1.273	0.828	1.044	0.947	1.263	0.67	1.507	0.809	1.221	1.175	1.291	1.377	1.212	1.151	1.47	1.143	1.331	1.054	0.894531	0.12566	nosig	Endoplasmin OS=Homo sapiens OX=9606 GN=HSP90B1 PE=1 SV=1	HSP90B1
P14770	1.795	0.455	1.555	1.841	0.745	0.771	0.784	1.106	1.684	0.729	0	0.624	0	4.773	0.2	0.2	0.239	1.259	1.352	0.408	0.854	2.659	0.641	1.383	0	0	0.372	0.826	2.024	0.805	0.811993	0.48696	nosig	Platelet glycoprotein IX OS=Homo sapiens OX=9606 GN=GP9 PE=1 SV=3	GP9
P14780	0.83	0.726	0.472	0.876	0.185	0.681	0.498	0.364	0.876	0.593	0.621	1.967	1.031	0.335	0.406	2.628	0.903	0.744	1.027	3.866	1.622	0.705	0.52	2.293	1.191	1.28	0.335	0.747	1.216	1.403	2.03573	0.00630395	up	Matrix metalloproteinase-9 OS=Homo sapiens OX=9606 GN=MMP9 PE=1 SV=3	MMP9
P14923	0.45	0.211	0.745	0.484	0.305	0.243	1.172	0.155	0.633	0.21	0.528	0.199	0.059	0.103	1.268	0.396	0.024	0.212	0.236	0.386	0.777	0.189	0.645	0.187	0.203	22.454	0.201	2.157	0.081	0.23	3.31326	0.349484	nosig	Junction plakoglobin OS=Homo sapiens OX=9606 GN=JUP PE=1 SV=3	JUP
P15085	0	0.171	0.175	0.33	0.707	0.154	1.544	0	0.25	0.114	0	1.558	2.398	2.286	2.948	2.024	0.25	1.137	0.144	1.901	0.577	2.688	0	0.818	0.136	1.412	0.703	0.248	0.254	1.627	3.35399	0.00456426	up	Carboxypeptidase A1 OS=Homo sapiens OX=9606 GN=CPA1 PE=1 SV=2	CPA1
P15086	2.563	0	1.598	0.81	0	0	0	0.455	0.355	0	0	0.719	0.774	0.772	0.629	0.587	0	0	0.707	2.092	0	0	0	0	2.907	0.635	0.719	0	0.602	0	0.963761	0.948952	nosig	Carboxypeptidase B OS=Homo sapiens OX=9606 GN=CPB1 PE=1 SV=4	CPB1
P15090	0.879	0.701	0.447	0.64	0.912	0.817	0.47	0.897	0.87	1.388	0.406	0.541	0.292	0.912	11.186	0.81	0.406	1.051	0.373	1.175	0.487	0.123	0.796	0.578	0.686	0.654	0.806	0.538	0.535	0.188	1.40525	0.553715	nosig	Fatty acid-binding protein, adipocyte OS=Homo sapiens OX=9606 GN=FABP4 PE=1 SV=3	FABP4
P15121	0.791	0.52	0.591	1.22	0.853	0.741	0.593	0.787	0.55	0.936	0.981	0.722	0.99	0.695	0.961	1.018	0.802	3.635	1.172	2.08	1.354	1.393	0.96	1.227	1.051	0.824	0.891	1.009	0.833	1.052	1.55961	0.014006	up	Aldo-keto reductase family 1 member B1 OS=Homo sapiens OX=9606 GN=AKR1B1 PE=1 SV=3	AKR1B1
P15144	1.088	0.864	0.972	0.92	0.884	0.778	0.855	0.926	0.848	0.772	1.209	0.765	0.901	1.22	0.772	1.114	1.297	1.598	1.203	1.917	0.998	1.533	1.372	1.45	1.194	0.96	0.917	1.081	1.452	1.248	1.35854	0.000144114	up	Aminopeptidase N OS=Homo sapiens OX=9606 GN=ANPEP PE=1 SV=4	ANPEP
P15169	1.445	1.56	1.352	1.268	1.566	1.53	1.491	1.232	1.417	1.269	1.552	1.265	1.154	0.881	0.874	1.228	1.337	0.659	1.444	0.268	1.321	0.931	1.384	0.986	1.588	1.194	1.324	0.952	1.105	1.353	0.806794	0.00245743	nosig	Carboxypeptidase N catalytic chain OS=Homo sapiens OX=9606 GN=CPN1 PE=1 SV=1	CPN1
P15289	0.55	0.665	0.962	0.622	0.99	0	0.065	0	1.01	0	1.031	1.537	1.991	1.699	1.072	0.898	1.96	0.735	0.833	1.167	1.229	0.919	2.4	1.184	1.363	0.822	0.143	1.648	2.235	0	2.55613	0.000734611	up	Arylsulfatase A OS=Homo sapiens OX=9606 GN=ARSA PE=1 SV=3	ARSA
P15291	1.154	0.847	0.847	0.551	1.051	0.931	0.964	1.027	0.963	0.757	1.038	1.03	1.077	0.716	1.587	1.272	0.907	1.238	1.1	2.034	1.876	0.779	1.031	1.381	1.245	0.962	1.104	1.2	1.496	0.92	1.31946	0.00409006	up	Beta-1,4-galactosyltransferase 1 OS=Homo sapiens OX=9606 GN=B4GALT1 PE=1 SV=5	B4GALT1
P15311	1.283	0.467	1.522	0.429	1.1	1.24	1.152	1.259	1.261	1.017	0.867	1.176	0.837	1.025	3.325	0.688	0.196	1.42	0.651	1.983	0.211	1.5	0.669	1.166	0.02	0.926	2.285	1.134	0.639	0.55	0.991053	0.963226	nosig	Ezrin OS=Homo sapiens OX=9606 GN=EZR PE=1 SV=4	EZR
P15529	0.429	1.264	0.526	0.595	0.424	0.739	0.868	0.843	1.219	0.66	0.744	1.208	1.487	0.924	1.486	1.186	0.635	2.893	1.764	2.093	1.302	1.189	0.721	1.182	1.087	0.643	0.73	1.342	0.99	0.459	1.59013	0.00870752	up	Membrane cofactor protein OS=Homo sapiens OX=9606 GN=CD46 PE=1 SV=3	CD46
P15531	0.438	0.414	1.498	0.766	0.804	1.136	0.796	0.732	0.364	0	0.241	0.608	0.782	0.687	2.063	3.348	0.923	0.537	0.427	1.713	1.169	1.744	0.572	1.849	0.324	1.208	3.478	1.553	0.298	1.145	1.77526	0.0378973	up	Nucleoside diphosphate kinase A OS=Homo sapiens OX=9606 GN=NME1 PE=1 SV=1	NME1
P15586	1.077	0.382	1.619	1.852	0.981	0	1.099	1.273	0.851	0	0.544	1.163	1.314	0.947	1.503	1.062	0.932	0.606	1.678	2.528	0.389	1.999	0	0.528	0.452	0.973	0.344	0.669	1.338	0.475	1.06437	0.810778	nosig	N-acetylglucosamine-6-sulfatase OS=Homo sapiens OX=9606 GN=GNS PE=1 SV=3	GNS
P15907	2.107	1.627	1.914	1.397	1.652	2.62	0	1.772	1.936	1.678	1.48	0.626	0.945	1.359	1.058	0.862	0.831	0	2.264	0.526	1.351	1.215	0.98	0.886	0.879	0.507	0.634	0.548	0.537	0.339	0.533647	0.00589482	down	Beta-galactoside alpha-2,6-sialyltransferase 1 OS=Homo sapiens OX=9606 GN=ST6GAL1 PE=1 SV=1	ST6GAL1
P15924	0.881	0.856	0.822	1.232	1.038	0.898	1.397	0.699	1.538	0.987	0.645	0.541	0.389	0.702	0.758	0.469	0.638	0.771	0.897	0.531	0.946	0.685	0.775	0.573	0.757	12.043	0.643	1.316	0.485	0.705	1.22096	0.695392	nosig	Desmoplakin OS=Homo sapiens OX=9606 GN=DSP PE=1 SV=3	DSP
P15954	1.115	0.538	0.291	1.007	1.08	0	0.713	1.405	0	4.165	0.77	0.499	0.381	1.785	1.124	0	1.932	3.203	0.629	0.579	0.669	0.639	1.502	0	0.667	1.295	0	0	0.291	0.778	0.811664	0.651023	nosig	Cytochrome c oxidase subunit 7C, mitochondrial OS=Homo sapiens OX=9606 GN=COX7C PE=1 SV=1	COX7C
P16035	0.28	0.458	0.279	1.121	0.408	0.214	0.322	1.082	0.35	1.099	0.829	1.169	0.39	0.519	2.339	0.394	0.708	3.43	0.949	2.139	1.401	2.148	0.558	1.485	1.116	0.687	0.701	1.214	1.532	0.737	2.17753	0.00418573	up	Metalloproteinase inhibitor 2 OS=Homo sapiens OX=9606 GN=TIMP2 PE=1 SV=2	TIMP2
P16070	1.118	0.848	0.681	0.717	0.807	0.709	0.785	1.038	0.706	0.758	1.261	0.979	0.674	1.124	0.809	0.98	1.313	1.703	1.286	1.787	1.611	1.758	1.032	1.225	1.143	1.101	1.242	1.113	1.296	1.375	1.51904	1.61E-05	up	CD44 antigen OS=Homo sapiens OX=9606 GN=CD44 PE=1 SV=3	CD44
P16152	0	0	0.462	0	1.88	0.422	0.413	0.384	0	0	0.301	0.942	0.703	3.403	1.369	0.751	0.478	0	0.554	1.402	0.454	1.486	0	0.959	0	0	3.286	0	0.559	0	2.33741	0.1077	nosig	Carbonyl reductase [NADPH] 1 OS=Homo sapiens OX=9606 GN=CBR1 PE=1 SV=3	CBR1
P16157	0.046	0	0.578	0.385	0	0.591	0	0.571	0.554	0.148	0	0.956	0.228	0	0.495	6.236	1.259	0.185	0.414	0.221	2.18	2.338	0.966	4.605	0	0.328	0.607	1.411	0.236	2.358	4.35486	0.0182433	up	Ankyrin-1 OS=Homo sapiens OX=9606 GN=ANK1 PE=1 SV=3	ANK1
P16233	0.51	1.001	0	0	1.254	0.111	0.711	0	0	1.271	0	0	0.346	0.171	0.911	0.483	1.565	1.489	0	4.03	0.106	1.14	0.772	1.553	0.383	1.439	0.138	0	0.145	0.586	1.5703	0.319802	nosig	Pancreatic triacylglycerol lipase OS=Homo sapiens OX=9606 GN=PNLIP PE=1 SV=1	PNLIP
P16284	1.39	0.355	0.996	1.869	0.728	0.593	0.623	0.887	0.553	0.495	1.031	0.614	0.839	0.856	1.093	1.011	0.276	2.666	1.124	2.412	0.722	1.816	0.681	0.711	1.762	0.975	0.581	1.651	0.869	0.999	1.33638	0.170447	nosig	Platelet endothelial cell adhesion molecule OS=Homo sapiens OX=9606 GN=PECAM1 PE=1 SV=2	PECAM1
P16402	1.196	0.883	0.202	0.669	0.443	1.112	0.306	0.843	0.367	0.812	0.764	0.39	0.322	0.322	2.302	0.233	0.426	0.232	0.358	1.317	0.663	0	0.316	0.725	0.518	1.06	12.577	1.284	0.344	1.335	1.86507	0.349247	nosig	Histone H1.3 OS=Homo sapiens OX=9606 GN=H1-3 PE=1 SV=2	H1-3
P16581	1.125	1.534	1.411	1.053	1.195	0.742	0.88	1.14	1.175	1.396	0.421	1.299	1.204	0.872	1.304	1.166	1.086	1.529	0.687	2.62	0.775	0.939	0.783	1.023	0.695	0.98	0.461	0.803	1.135	0.993	0.891554	0.33661	nosig	E-selectin OS=Homo sapiens OX=9606 GN=SELE PE=1 SV=1	SELE
P16870	1.09	0.743	0.638	1.145	2.066	1.108	0.851	0.68	0.879	0.65	0.814	1.944	1.43	0.803	0.492	0.708	0.854	3.45	0.641	1.98	0.765	0.741	0.947	1.828	0.999	0.571	0.704	0.646	1.403	0.649	1.13548	0.529967	nosig	Carboxypeptidase E OS=Homo sapiens OX=9606 GN=CPE PE=1 SV=1	CPE
P16930	0.685	0.543	0.277	0.466	0.342	1.143	0.361	0.598	0.26	0.392	0.722	1.21	1.033	5.086	2.91	1.041	0.637	2.742	0.829	2.869	0.427	0.865	0.304	0.432	0.275	0.789	0.395	0.643	0.781	0.724	2.43872	0.0180854	up	Fumarylacetoacetase OS=Homo sapiens OX=9606 GN=FAH PE=1 SV=2	FAH
P17050	1.15	1.878	2.028	1.233	1.652	1.643	1.861	1.559	2.272	1.472	1.172	1.337	1.393	1.335	0.753	1.213	1.098	0.313	1.018	0.515	1.108	0.574	1.215	0.943	0.94	1.182	0.972	0.867	1.095	1.469	0.612372	0.00012096	down	Alpha-N-acetylgalactosaminidase OS=Homo sapiens OX=9606 GN=NAGA PE=1 SV=2	NAGA
P17174	0.678	0.423	0.474	0.579	0.602	0.314	0.38	0.604	0.387	0.411	0.676	1.11	0.867	2.897	3.751	0.851	0.754	2.971	0.843	2.583	0.706	1.338	0.386	0.808	0.816	0.613	0.639	0.836	0.745	0.43	2.5371	0.00303797	up	Aspartate aminotransferase, cytoplasmic OS=Homo sapiens OX=9606 GN=GOT1 PE=1 SV=3	GOT1
P17301	2.577	1.92	1.922	1.711	0.176	1.067	1.039	0.505	0.194	0.149	2.923	1.186	1.874	0.222	0.776	0.114	2.129	0.151	1.791	0.431	2.113	0.312	0.261	1.861	1.939	1.706	2.471	1.319	0.197	1.902	1.14023	0.648842	nosig	Integrin alpha-2 OS=Homo sapiens OX=9606 GN=ITGA2 PE=1 SV=1	ITGA2
P17655	1.41	0.988	1.467	1.599	1.152	1.14	1.178	1.17	1.478	1.348	1.406	0.675	0.809	1.022	0.752	0.744	0.969	1.415	1.071	0.649	1.318	1.451	1.223	0.776	1.436	1.228	1.242	1.31	1.598	1.402	0.869915	0.0773398	nosig	Calpain-2 catalytic subunit OS=Homo sapiens OX=9606 GN=CAPN2 PE=1 SV=6	CAPN2
P17661	1.711	1.244	1.108	1.108	1.164	0.659	0.666	1.099	0.819	1.344	1.468	0.658	0.925	0.625	0.962	1.027	1.455	0.684	2.978	0.843	1.465	0.958	4.014	0.66	1.239	1.476	1.332	0.596	0.583	1.026	1.14329	0.472435	nosig	Desmin OS=Homo sapiens OX=9606 GN=DES PE=1 SV=3	DES
P17813	0.498	1.043	2.237	0.488	0.855	1.773	0.245	1.809	1.112	1.37	1.089	0.258	0.322	0.389	1.634	1.117	2.107	2.048	1.282	1.229	0.686	1.545	0.811	1.608	1.25	0.401	1.212	1.014	0.326	2.039	0.978434	0.921334	nosig	Endoglin OS=Homo sapiens OX=9606 GN=ENG PE=1 SV=2	ENG
P17900	0.569	0.534	1.154	1.403	0.496	0.454	0.651	0.613	0.631	0.462	0.815	2.716	2.237	1.954	1.485	0.935	0.558	1.106	1.422	1.757	0.961	0.971	1.811	0.898	1.453	2.619	0.622	0.632	0.622	0.811	1.89357	0.00181897	up	Ganglioside GM2 activator OS=Homo sapiens OX=9606 GN=GM2A PE=1 SV=4	GM2A
P17931	0.953	0.533	1.56	1.275	1.813	0.482	0.26	1.446	0.697	1.247	1.392	0.146	1.186	0.86	1.892	0.294	1.481	1.167	1.035	1.263	1.294	1.605	0.421	2.674	1.106	1.053	1.106	1.28	1.279	0.942	1.14339	0.481805	nosig	Galectin-3 OS=Homo sapiens OX=9606 GN=LGALS3 PE=1 SV=5	LGALS3
P17936	1.394	1.823	1.329	1.372	1.743	1.885	1.614	0.743	1.657	1.476	1.24	1.355	1.042	1.633	0.91	0.595	1.556	0.585	0.727	0.222	1.091	0.321	1.794	1.361	1.823	1.173	1.235	1.551	0.872	1.222	0.74182	0.0139559	down	Insulin-like growth factor-binding protein 3 OS=Homo sapiens OX=9606 GN=IGFBP3 PE=1 SV=2	IGFBP3
P18065	1.288	0.538	1.112	1.185	2.348	0.583	0.876	1.007	1.119	1.829	0.38	0.535	1.376	0.602	1.384	0.941	0.509	1.117	1.874	0.731	2.95	2.012	0.614	0.818	1.107	1.149	0.751	1.467	1.066	1.512	0.963189	0.845592	nosig	Insulin-like growth factor-binding protein 2 OS=Homo sapiens OX=9606 GN=IGFBP2 PE=1 SV=2	IGFBP2
P18206	1.216	0.923	1.158	1.12	1.023	1.323	0.977	1.063	0.945	0.944	1.022	0.764	0.87	1.008	1.545	0.984	0.623	1.883	1.253	1.909	0.72	1.706	0.919	0.806	1.158	0.824	1.586	0.66	0.823	0.889	1.02656	0.779979	nosig	Vinculin OS=Homo sapiens OX=9606 GN=VCL PE=1 SV=4	VCL
P18428	1.435	1.613	1.644	0.351	1.178	1.282	1.041	1.6	1.296	1.07	1.053	1.384	1.843	1.007	0.875	3.049	1.114	0.051	1.263	1.446	0.969	0.585	1.311	1.022	0.539	0.766	1.309	0.905	1.462	1.172	0.924261	0.602883	nosig	Lipopolysaccharide-binding protein OS=Homo sapiens OX=9606 GN=LBP PE=1 SV=3	LBP
P18669	0.811	0.864	1.464	0.79	1.426	0.918	1.496	1.085	0.786	1.02	0.821	0.741	1.167	1.411	1.869	1.285	1.222	1.23	1.283	1.208	1.089	0.623	1.477	1.118	0.831	1.195	1.839	1.352	0.705	1.261	1.1129	0.320192	nosig	Phosphoglycerate mutase 1 OS=Homo sapiens OX=9606 GN=PGAM1 PE=1 SV=2	PGAM1
P18850	2.131	0.26	2.145	0.228	0.277	0.499	7.979	0.403	0.316	0.272	0.603	1.727	2.33	1.965	0.389	0.554	0.647	0.635	0.343	1.184	0.408	0.647	0.546	1.889	0.452	0.437	1.356	0.65	2.789	1.931	0.740248	0.640594	nosig	Cyclic AMP-dependent transcription factor ATF-6 alpha OS=Homo sapiens OX=9606 GN=ATF6 PE=1 SV=3	ATF6
P19021	0.529	0.528	0.446	0.345	0.597	0.503	0.454	0.511	0.509	0.515	0.399	0.329	0.598	0.511	0.451	6.562	0.536	0.677	0.428	0.407	5.515	0.557	0.592	0.467	5.429	0.297	0.411	0.591	5.744	0.469	3.13652	0.0452049	up	Peptidyl-glycine alpha-amidating monooxygenase OS=Homo sapiens OX=9606 GN=PAM PE=1 SV=2	PAM
P19022	1.596	1.378	1.162	1.051	1.222	1.067	1.785	1.116	1.238	0.928	1.037	1.039	1.346	1.192	1.054	1.074	0.877	1.491	0.806	0.957	1.358	0.81	1.098	1.506	1.565	1.056	0.826	1.164	1.179	1.094	0.898071	0.209662	nosig	Cadherin-2 OS=Homo sapiens OX=9606 GN=CDH2 PE=1 SV=4	CDH2
P19320	0.435	0.441	0.372	0.46	0.511	0.351	0.471	0.467	0.409	0.36	0.636	1.341	1.163	0.656	1.556	1.834	0.861	3.645	1.092	2.485	1.507	1.188	0.945	1.276	0.867	0.946	1.223	1.141	0.924	0.543	3.01952	3.03E-05	up	Vascular cell adhesion protein 1 OS=Homo sapiens OX=9606 GN=VCAM1 PE=1 SV=1	VCAM1
P19338	0	0.47	0.263	0	0.183	0.258	0	0.358	0.58	0	0	0	0.377	0.235	8.894	0.35	0.135	0.497	0	0.311	0	0	0.338	0.257	0.139	0.492	4.717	0.626	0	0.505	4.2313	0.173769	nosig	Nucleolin OS=Homo sapiens OX=9606 GN=NCL PE=1 SV=3	NCL
P19440	0.798	0.571	1.185	0.434	0.776	0.831	1.044	0.598	1.408	0.592	1.035	3.165	0.899	1.369	0.842	0.852	0.967	1.897	1.178	2.489	1.061	0.848	0.887	0.798	0.934	0.843	0.633	0.859	1.309	1.155	1.45806	0.0354395	up	Glutathione hydrolase 1 proenzyme OS=Homo sapiens OX=9606 GN=GGT1 PE=1 SV=2	GGT1
P19652	1.472	2.554	3.02	1.339	1.787	1.874	1.029	2.009	1.182	1.689	0.969	0.913	1.634	0.764	1.205	1.043	1.628	0.493	0.903	0.54	1.211	0.574	1.123	0.981	1.28	0.47	1.136	0.825	0.883	0.548	0.532526	0.00176846	down	Alpha-1-acid glycoprotein 2 OS=Homo sapiens OX=9606 GN=ORM2 PE=1 SV=2	ORM2
P19823	1.39	1.624	1.345	1.63	1.493	1.376	1.603	1.416	1.421	1.55	1.387	1.293	1.356	1.237	1.044	1.216	1.388	0.496	1.461	0.211	1.003	0.802	1.175	1.037	1.373	1.143	1.104	1.163	1.163	1.218	0.749933	5.14E-05	down	Inter-alpha-trypsin inhibitor heavy chain H2 OS=Homo sapiens OX=9606 GN=ITIH2 PE=1 SV=2	ITIH2
P19827	1.372	1.963	1.596	1.576	1.74	1.539	1.662	1.563	1.814	1.712	1.299	1.103	1.368	1.312	1.039	1.129	1.24	0.477	1.073	0.274	0.865	0.663	1.352	0.864	0.932	1.094	1.102	1.075	1.212	1.29	0.627774	5.49E-08	down	Inter-alpha-trypsin inhibitor heavy chain H1 OS=Homo sapiens OX=9606 GN=ITIH1 PE=1 SV=3	ITIH1
P19957	0.601	0.673	0.776	0.87	0.494	0.539	0.58	0.727	1.13	1.37	1.572	0.828	0.741	0.776	1.91	0.612	0.643	0.138	1.071	0.819	2.441	1.489	2.422	1.622	1.329	2.333	3.547	0.662	0.569	1.585	1.74671	0.0101202	up	Elafin OS=Homo sapiens OX=9606 GN=PI3 PE=1 SV=3	PI3
P20023	1.875	1.42	0.691	0.792	0.798	0.383	0.757	0.488	0.516	0.326	0.788	0.793	1.348	0.72	0.268	0.739	1.6	5.263	0.309	1.172	1.162	0.902	0.758	1.825	1.047	1.7	0.96	0.928	0.71	0.965	1.48875	0.169171	nosig	Complement receptor type 2 OS=Homo sapiens OX=9606 GN=CR2 PE=1 SV=2	CR2
P20036	0	1.037	0.746	0	1.208	1.585	1.037	1.265	0.786	0.846	0.99	1.093	1.359	0.263	0	1.929	1.419	0.346	0	1.613	1.478	1.361	1.6	1.523	1.923	1.194	1.176	0.358	0.668	0	1.1923	0.459496	nosig	HLA class II histocompatibility antigen, DP alpha 1 chain OS=Homo sapiens OX=9606 GN=HLA-DPA1 PE=1 SV=1	HLA-DPA1
P20061	0.92	1.031	0.71	1.081	0.593	0.997	0.663	0.689	0.514	0.882	1.096	0.561	0.723	0.529	0.867	0.887	1.631	3.107	0.941	3.576	0.681	0.884	0.531	0.921	0.989	0.597	0.733	1.06	0.663	0.837	1.34988	0.15517	nosig	Transcobalamin-1 OS=Homo sapiens OX=9606 GN=TCN1 PE=1 SV=2	TCN1
P20073	1.052	1.18	1.126	1.527	1.055	1	0.687	0.936	0	0.07	0	0.982	0.917	0.424	1.455	1.077	0	1.643	1.034	1.468	1.511	2.442	0.865	0.984	1.373	0.985	0.077	0	1.21	0.929	1.12221	0.617294	nosig	Annexin A7 OS=Homo sapiens OX=9606 GN=ANXA7 PE=1 SV=3	ANXA7
P20160	0.796	1.045	0.466	0.701	0.277	0.993	1.249	1.244	0.348	0.717	0.067	3.766	0.36	0.207	0.639	0.93	0.314	0.745	0.514	3.555	1.24	0.154	0.482	5.141	0.348	0.625	0.974	0.377	0.178	2.897	1.50032	0.263381	nosig	Azurocidin OS=Homo sapiens OX=9606 GN=AZU1 PE=1 SV=3	AZU1
P20618	0.678	0.437	1.328	0.737	0.45	0.915	0.527	0.663	0.963	0.965	0.454	1.511	0.498	3.497	7.226	0.954	0.332	0.831	0.976	0.985	0.468	0.769	0.673	0.874	0.426	0.603	0.987	0.614	1.306	0.51	1.5982	0.218493	nosig	Proteasome subunit beta type-1 OS=Homo sapiens OX=9606 GN=PSMB1 PE=1 SV=2	PSMB1
P20701	1.775	2	1.468	1.341	1.485	1.556	1.465	1.643	1.372	1.613	1.198	0.916	1.123	0.797	0.793	1.692	1.08	0.97	1.289	0.638	0.983	0.658	1.016	0.768	1.423	1.06	1.005	0.951	0.948	1.442	0.660071	2.52E-06	down	Integrin alpha-L OS=Homo sapiens OX=9606 GN=ITGAL PE=1 SV=3	ITGAL
P20742	0.518	0.739	1.313	1.368	1.295	1.462	1.074	6.778	4.248	0.526	0.62	0.754	2.559	0.325	1.722	2.471	0.568	0.528	1.024	0.267	1.378	0.019	0.92	0.395	0.521	0.511	1.596	0.782	0.485	0.591	0.466746	0.146022	nosig	Pregnancy zone protein OS=Homo sapiens OX=9606 GN=PZP PE=1 SV=4	PZP
P20774	0.749	1.496	0.875	1.328	1.047	1.294	1.163	0.745	1.08	1.534	0.96	1.219	1.089	1.07	1.612	1.599	1.426	1.436	1.265	0.837	1.475	0.954	1.17	1.096	1.022	1.059	1.116	0.96	1.132	1.083	1.04235	0.648439	nosig	Mimecan OS=Homo sapiens OX=9606 GN=OGN PE=1 SV=1	OGN
P20851	1.675	1.732	1.667	1.476	1.686	1.652	1.838	1.862	1.763	1.726	1.489	1.113	1.084	1.299	0.804	1.009	1.138	0.466	1.127	0.281	0.984	0.53	1.237	0.914	1.312	1.287	0.995	1.065	1.018	1.246	0.597236	1.43E-09	down	C4b-binding protein beta chain OS=Homo sapiens OX=9606 GN=C4BPB PE=1 SV=1	C4BPB
P20908	1.086	2.095	1.758	1.042	0.567	2.003	1.371	1.416	1.695	1.447	1.412	1.658	1.159	1.116	0.488	0.388	0.685	0.037	1.301	0.32	1.054	1.339	1.244	1.53	1.531	2.417	0.14	1.011	2.308	1.649	0.786844	0.149976	nosig	Collagen alpha-1(V) chain OS=Homo sapiens OX=9606 GN=COL5A1 PE=1 SV=3	COL5A1
P20930	0.202	0.227	0.696	0.669	0.551	0.275	0.691	2.983	0.649	0.62	0.534	0.612	0.581	0.314	2.298	0.776	0.077	0.261	0.79	0.188	1.176	0.41	0.23	0.268	0.177	17.983	0.218	0.592	0.087	0.19	1.83538	0.497994	nosig	Filaggrin OS=Homo sapiens OX=9606 GN=FLG PE=1 SV=3	FLG
P20933	0.753	0.863	0.943	0.698	0.942	1	0.835	0.999	0.954	0.602	1.091	0.461	0.93	1.825	1.814	0.775	1.097	2.342	0.866	2.287	1.244	1.319	1.129	0.485	0.959	0.975	0.825	0.904	1.009	0.802	1.34701	0.025286	up	N(4)-(beta-N-acetylglucosaminyl)-L-asparaginase OS=Homo sapiens OX=9606 GN=AGA PE=1 SV=2	AGA
P21291	1.285	0.386	1.398	0.914	0.159	0.333	0.328	0.373	0.178	0.367	0.18	1.962	0.358	0.664	4.716	0.139	0.309	0.126	0.259	4.345	0.301	4.634	0.304	0.301	0.123	0	0.463	0.496	0.392	0.261	1.77705	0.255656	nosig	Cysteine and glycine-rich protein 1 OS=Homo sapiens OX=9606 GN=CSRP1 PE=1 SV=3	CSRP1
P21333	0.817	0.434	1.48	1.537	0.613	0.81	0.707	1.213	0.695	0.735	0.187	1.742	0.175	0.822	0.622	0.198	0.241	1.009	0.414	4.509	0.629	3.03	0.479	1.557	0.249	0.257	1.778	0.642	0.897	0.354	1.09451	0.75704	nosig	Filamin-A OS=Homo sapiens OX=9606 GN=FLNA PE=1 SV=4	FLNA
P21583	0.951	0.335	0.854	0.928	0.744	0.914	0.831	0.823	0	0.637	1.039	0.801	1.057	0	1.428	0.897	1.631	1.132	1.615	1	2.678	0.88	1.134	1.154	1.481	1.243	1.435	1.777	1.315	1.262	1.77847	0.00110906	up	Kit ligand OS=Homo sapiens OX=9606 GN=KITLG PE=1 SV=1	KITLG
P21757	0	0.21	0	0	0.205	0.306	0	0.252	0.248	0.19	0	0	1.081	0.189	0.324	0.539	0	4.08	0	4.684	0.454	0	0.184	0.155	0.206	0.268	0.28	0.118	0	0	4.45145	0.116151	nosig	Macrophage scavenger receptor types I and II OS=Homo sapiens OX=9606 GN=MSR1 PE=1 SV=1	MSR1
P21810	0	2.044	0	1.703	0.009	3.09	0.019	0	1.397	1.676	1.582	0.017	1.801	0	1.355	1.148	0.005	1.785	0.01	1.309	1.351	1.679	0	1.762	0.008	1.37	0.11	0.848	0.04	1.407	0.884836	0.776523	nosig	Biglycan OS=Homo sapiens OX=9606 GN=BGN PE=1 SV=2	BGN
P22102	1.516	1.346	1.526	0	1.398	1.469	1.44	1.863	1.308	0	0	1.054	1.404	1.107	1.456	1.345	0	0.289	1.401	0.194	0	0.201	1.645	1.171	0	1.575	0.288	2.063	0	0	0.64019	0.114639	nosig	Trifunctional purine biosynthetic protein adenosine-3 OS=Homo sapiens OX=9606 GN=GART PE=1 SV=1	GART
P22314	0.311	0.583	1.044	0	0.788	0.797	0.602	1.448	0.401	0.514	0	1.257	1.898	1.686	0.586	2.008	1.092	0.108	0.27	0.366	1.472	0.463	0.896	2.438	0.476	1.288	7.5	0.961	0.906	0	1.97834	0.111752	nosig	Ubiquitin-like modifier-activating enzyme 1 OS=Homo sapiens OX=9606 GN=UBA1 PE=1 SV=3	UBA1
P22352	1.282	0.895	1.282	0.995	1.539	1.034	1.323	1.1	1.172	0.881	1.54	0.794	1.627	1.182	1.683	1.297	1.078	0.518	0.858	1.33	1.391	1.435	0.907	1.36	0.863	0.896	0.719	1.376	1.141	1.123	1.00487	0.95472	nosig	Glutathione peroxidase 3 OS=Homo sapiens OX=9606 GN=GPX3 PE=1 SV=2	GPX3
P22413	0.358	0.896	0	0.364	0.641	0.795	0	0.667	1.197	0.482	0.756	0.506	1.088	1.749	0.883	0.936	0.785	2.008	1.013	0.848	1.729	1.637	1.94	2.154	1.488	1.156	1.71	0.809	1.49	1.258	2.40213	0.000109278	up	Ectonucleotide pyrophosphatase/phosphodiesterase family member 1 OS=Homo sapiens OX=9606 GN=ENPP1 PE=1 SV=2	ENPP1
P22692	0.817	1.118	0.934	1.057	0.971	0.963	1.152	0.969	1.267	0.999	0.735	1.209	1.054	0.945	1.858	1.354	1.202	2.081	1.01	1.453	1.327	1.164	1.375	0.986	0.617	1.12	0.579	0.891	1.074	1.018	1.12482	0.173814	nosig	Insulin-like growth factor-binding protein 4 OS=Homo sapiens OX=9606 GN=IGFBP4 PE=1 SV=2	IGFBP4
P22792	1.301	1.645	1.638	1.345	1.516	1.528	1.604	1.309	1.373	1.42	1.679	1.175	1.187	0.868	0.938	1.118	1.22	0.616	1.381	0.316	1.057	1.004	1.343	0.957	1.488	1.126	1.227	0.912	1.35	1.265	0.757102	0.000127771	down	Carboxypeptidase N subunit 2 OS=Homo sapiens OX=9606 GN=CPN2 PE=1 SV=3	CPN2
P22891	1.119	1.33	1.717	0.963	0.758	0.9	2.916	0.516	0.739	1.004	2.786	2.33	1.99	1.439	1.008	0.561	1.379	0.103	1.883	0.143	1.7	0.32	1.681	0.464	2.817	1.44	0.387	0.407	1.49	1.537	1.08113	0.739921	nosig	Vitamin K-dependent protein Z OS=Homo sapiens OX=9606 GN=PROZ PE=1 SV=2	PROZ
P22894	0	1.542	1.415	1.306	1.337	1.375	0	0	0	1.193	1.047	1.349	1.166	0.906	0.759	0	1.095	0.702	0.855	1.75	0.909	0.772	1.204	0.975	1.246	1.09	1.064	0.878	0.868	0	1.14073	0.642066	nosig	Neutrophil collagenase OS=Homo sapiens OX=9606 GN=MMP8 PE=1 SV=1	MMP8
P22897	0.894	0.874	0.781	0.806	0.672	0.642	0.829	0.872	0.761	0.91	1.065	0.947	0.945	0.837	2.628	1.385	0.935	1.925	1.29	2.241	1.1	1.164	0.878	0.723	1.129	0.808	0.819	1.015	1.059	0.769	1.47133	0.0039756	up	Macrophage mannose receptor 1 OS=Homo sapiens OX=9606 GN=MRC1 PE=1 SV=1	MRC1
P23141	0.235	0.357	0.679	0.287	0.416	0.605	0.586	0.508	0.247	0.59	0.734	1.672	0.789	3.191	12.365	0.332	0.395	0.273	0.857	0.973	0.087	0.599	0.362	0.616	0.31	0.537	0.408	0.219	0.805	0.309	2.86397	0.180276	nosig	Liver carboxylesterase 1 OS=Homo sapiens OX=9606 GN=CES1 PE=1 SV=2	CES1
P23142	0.695	0.767	0.841	1.021	1.094	0.685	0.869	0.892	0.872	0.937	1.104	0.994	1.043	0.883	1.033	1.021	1.025	1.584	1.484	1.394	1.006	2.034	1.302	1.307	1.303	1.3	1.149	1.239	1.55	1.045	1.42972	2.49E-05	up	Fibulin-1 OS=Homo sapiens OX=9606 GN=FBLN1 PE=1 SV=4	FBLN1
P23229	1.815	1.581	1.492	1.602	1.399	1.47	1.607	1.552	1.696	0.743	0.832	0.886	1.709	0.961	1.218	0.701	0.865	1.262	0.907	0.987	1.048	1.031	1.252	0.703	1.165	1.129	0.981	0.904	1.025	0.803	0.680919	0.000392249	down	Integrin alpha-6 OS=Homo sapiens OX=9606 GN=ITGA6 PE=1 SV=5	ITGA6
P23280	1.674	0.857	0.981	2.068	1.267	1.753	1.038	1.733	0.964	2.143	2.314	0.707	0.438	1.241	0	0	0	0.595	0	0	0	0	0.899	1.221	0.834	1.549	1.176	1.26	1.375	1.073	0.507045	0.00275754	down	Carbonic anhydrase 6 OS=Homo sapiens OX=9606 GN=CA6 PE=1 SV=3	CA6
P23284	0.727	0.916	2.068	3.142	0.6	0.792	0.576	1.294	0.558	1.114	0.474	1.272	0.235	1.854	0.477	0.167	0.841	1.15	1.259	3.453	0.032	1.234	0.582	1.349	1.097	0.799	0.895	0.368	1.064	0.98	0.830661	0.528739	nosig	Peptidyl-prolyl cis-trans isomerase B OS=Homo sapiens OX=9606 GN=PPIB PE=1 SV=2	PPIB
P23396	0	0.861	0.737	0.757	0.884	0	0.7	0	0.962	0.436	0.688	1.269	1.459	0.787	2.762	1.324	0.757	1.59	2.155	1.086	0.873	0.983	0.853	0.864	1.202	1.346	0	1.021	1.281	0.815	2.16554	0.00185236	up	40S ribosomal protein S3 OS=Homo sapiens OX=9606 GN=RPS3 PE=1 SV=2	RPS3
P23470	0.832	0.665	0.632	0.561	0.933	1.025	1.45	1.231	0.765	0.773	0.729	0.6	0.541	0.747	1.503	0.822	0.628	1.525	0.934	2.639	0.886	1.582	0.739	0.834	1.712	1.686	0.625	1.28	1.655	1.205	1.28973	0.0985971	nosig	Receptor-type tyrosine-protein phosphatase gamma OS=Homo sapiens OX=9606 GN=PTPRG PE=1 SV=4	PTPRG
P23490	0	0	1.112	0	0.405	0	1.27	0.912	0.774	0	0.643	0	0.797	1.634	0.231	2.51	0.391	0.698	1.047	0	0.762	0.214	0.874	1.352	0	8.717	0.139	0.29	0	0.566	2.33233	0.206333	nosig	Loricrin OS=Homo sapiens OX=9606 GN=LORICRIN PE=1 SV=2	LORICRIN
P23526	0.432	0.332	0.683	0.392	8.126	1.136	0	0.487	0.327	0.332	0.262	0.662	1.492	0.868	2.016	2.717	1.183	0.552	0.434	1.475	0.856	1.481	0.335	1.233	0.522	1.048	1.768	0.778	0.33	0.686	0.845023	0.814163	nosig	Adenosylhomocysteinase OS=Homo sapiens OX=9606 GN=AHCY PE=1 SV=4	AHCY
P24043	0.411	0.446	0.397	0.564	0.371	0.392	0.43	0.356	0.308	0.369	0.506	0.492	0.425	0.421	6.868	0.233	0.517	2.044	0.322	4.739	0.455	1.106	0.514	0.38	0.508	0.281	0.401	0.49	0.71	0.441	2.7019	0.0852957	nosig	Laminin subunit alpha-2 OS=Homo sapiens OX=9606 GN=LAMA2 PE=1 SV=4	LAMA2
P24158	0.392	0.491	0.485	0.382	0.183	0.493	1.013	0.756	0	0.341	0	3.761	1.239	0.012	0.412	0.072	0.089	1.156	0	3.909	1.048	0.277	0	4.656	0.019	0	1.446	0.022	0	0.206	2.01984	0.186404	nosig	Myeloblastin OS=Homo sapiens OX=9606 GN=PRTN3 PE=1 SV=3	PRTN3
P24298	1.376	2.013	1.634	1.233	0.709	0.957	1.378	1.14	1.683	0.792	1.018	1.281	0.708	2.285	1.009	1.003	1.869	1.767	0.801	0.802	0.606	1.57	0.85	0.642	1.28	1.03	1.028	0.708	0.777	0.996	0.852884	0.263424	nosig	Alanine aminotransferase 1 OS=Homo sapiens OX=9606 GN=GPT PE=1 SV=3	GPT
P24387	0.891	1.216	1.596	0.738	1.102	1.415	1.228	1.464	1.042	1.126	1.181	1.827	1.216	1.779	0.689	1.36	1.733	0.118	1.399	0.845	1.516	0.753	1.629	1.388	0.94	1.035	1.106	1.162	1.965	0.846	1.036	0.74879	nosig	Corticotropin-releasing factor-binding protein OS=Homo sapiens OX=9606 GN=CRHBP PE=1 SV=2	CRHBP
P24592	0.741	0.902	1.127	0.824	0.301	0.775	1.14	0.337	0.304	0.728	0.95	1.05	1.036	0.327	1.84	1.124	1.106	2.401	0.669	2.145	1.702	1.505	0.186	1.338	0.986	1.019	0.867	1.124	1.582	1.405	1.69675	0.00367812	up	Insulin-like growth factor-binding protein 6 OS=Homo sapiens OX=9606 GN=IGFBP6 PE=1 SV=1	IGFBP6
P24593	1.124	1.236	0.754	2.027	1.053	0.993	1.682	0.623	1.436	1.336	0.747	0.849	0.798	1.531	1.102	0.718	0.835	2.484	0.518	0.88	0.953	0.975	1.191	0.856	1.424	1.018	0.747	1.658	0.906	1.861	0.899013	0.47407	nosig	Insulin-like growth factor-binding protein 5 OS=Homo sapiens OX=9606 GN=IGFBP5 PE=1 SV=1	IGFBP5
P24821	0.413	1.149	1.023	1.593	0.964	0.982	1.026	0.918	0.826	1.798	1.469	0.898	0.959	1.338	1.588	1.35	1.203	1.377	1.385	1.138	0.935	1.259	1.178	0.972	1.217	0.987	0.901	1.798	0.912	0.714	1.1026	0.43602	nosig	Tenascin OS=Homo sapiens OX=9606 GN=TNC PE=1 SV=3	TNC
P24844	1.24	1.294	1.076	1.077	1.083	1.276	1.263	1.373	1.191	1.198	1.145	0.996	1.048	3.436	1.021	1.243	1.039	0.736	1.294	0.607	0.933	1.275	1.231	0.891	1.443	1.091	1.099	1.021	0.896	1.313	0.984094	0.88456	nosig	Myosin regulatory light polypeptide 9 OS=Homo sapiens OX=9606 GN=MYL9 PE=1 SV=4	MYL9
P25311	1.339	1.393	1.367	1.222	1.287	1.237	1.576	1.24	1.38	1.263	1.303	0.869	1.017	1.036	1.028	0.917	1.012	1.329	1.032	0.666	1.353	0.871	1.267	1.41	1.538	1.202	1.008	1.249	1.157	1.094	0.840274	0.00112765	nosig	Zinc-alpha-2-glycoprotein OS=Homo sapiens OX=9606 GN=AZGP1 PE=1 SV=2	AZGP1
P25391	1.629	2.359	0.032	1.55	0	0	0.035	0.403	0.33	2.735	0.423	2.017	1.875	1.776	0.445	0.461	1.395	0.046	1.568	0	0	2.175	1.567	1.634	1.574	0	0.156	1.193	1.606	1.767	1.19464	0.648245	nosig	Laminin subunit alpha-1 OS=Homo sapiens OX=9606 GN=LAMA1 PE=1 SV=2	LAMA1
P25774	0.73	0.62	1.378	1.279	0.652	1.16	0.905	0.651	0.437	1.514	1.416	0.832	1.426	1.511	1.644	1.441	1.363	1.921	1.689	0.972	1.192	0.442	0.991	1.099	1.589	0.755	0.88	1.752	1.339	0.747	1.34039	0.0443258	up	Cathepsin S OS=Homo sapiens OX=9606 GN=CTSS PE=1 SV=3	CTSS
P25786	1.651	0.74	0.665	1.031	0.857	0.955	0.937	0.903	0.831	2.618	0.776	1.027	0.577	1.366	2.222	0.673	0.286	3.649	0.416	1.579	1.464	1.068	0.637	0.978	0.619	0.547	0.739	0.601	0.928	0.465	0.921389	0.733001	nosig	Proteasome subunit alpha type-1 OS=Homo sapiens OX=9606 GN=PSMA1 PE=1 SV=1	PSMA1
P25788	0.787	1.446	1.667	0.939	1.118	1.219	1.17	1.358	1.475	1.441	1.261	1.43	1.8	1.827	1.864	1.123	1.698	0.604	1.036	0.561	0.629	0.549	1.345	0.986	1.448	1.217	1.1	0.995	0.898	1.209	0.934231	0.515885	nosig	Proteasome subunit alpha type-3 OS=Homo sapiens OX=9606 GN=PSMA3 PE=1 SV=2	PSMA3
P25815	1.131	1.693	0.222	1.298	0	1.286	1.068	1.565	0	1.523	0.638	0.466	0.992	0	0.998	0.821	0.901	1.156	0.384	2.512	0.81	0.387	0	1.175	0.738	1.268	0.827	1.95	0.395	1.728	0.927141	0.778699	nosig	Protein S100-P OS=Homo sapiens OX=9606 GN=S100P PE=1 SV=2	S100P
P26038	1.363	0.683	1.133	1.196	1.168	1.184	1.174	1.249	0.917	1.217	1.42	0.927	1.004	1.246	1.298	0.933	1.366	1.074	0.936	0.812	1.134	1.138	1.011	1.1	1.709	1.496	1.792	1.276	1.023	1.16	1.05703	0.45256	nosig	Moesin OS=Homo sapiens OX=9606 GN=MSN PE=1 SV=3	MSN
P26447	0.92	0.803	0.972	1.147	0.454	1.111	0.818	0.978	0.498	1.122	0.634	0.713	1.106	0.595	0.739	2.544	1.625	1.287	0.778	1.102	1.239	1.625	0.79	1.397	0.693	1.11	3.931	1.646	0.68	1.057	1.43324	0.0584815	nosig	Protein S100-A4 OS=Homo sapiens OX=9606 GN=S100A4 PE=1 SV=1	S100A4
P26572	1.356	0.587	0.54	0.882	0.894	0.844	1.365	1.064	0.653	1.152	1.269	2.035	0.173	1.033	1.166	1.12	1.33	1.887	1.451	1.191	0.507	1.847	1.896	1.268	0.549	0.514	1.724	1.061	1.528	0.737	1.30052	0.0728311	nosig	Alpha-1,3-mannosyl-glycoprotein 2-beta-N-acetylglucosaminyltransferase OS=Homo sapiens OX=9606 GN=MGAT1 PE=1 SV=2	MGAT1
P26641	1.425	1.46	1.453	1.148	1.626	1.505	1.835	0.755	1.965	1.484	1.227	1.185	1.561	1.323	1.795	1.393	0.657	0.379	1.377	0.772	0.979	1.268	0.935	0.745	1.319	0.717	1.033	0.969	1.097	0.512	0.72472	0.00699772	down	Elongation factor 1-gamma OS=Homo sapiens OX=9606 GN=EEF1G PE=1 SV=3	EEF1G
P26927	1.275	1.577	1.586	1.397	1.208	1.544	1.709	1.433	1.712	1.935	1.348	1.088	1.232	1.186	0.781	1.192	1.591	0.391	1.258	0.26	1.107	0.827	1.431	1.356	1.324	1.217	1.066	0.692	1.023	1.611	0.714783	0.000301018	down	Hepatocyte growth factor-like protein OS=Homo sapiens OX=9606 GN=MST1 PE=1 SV=2	MST1
P26992	0.806	0	0.365	0.882	1.067	0.511	0.893	1.189	0.641	0.883	0.52	1.215	1.535	1.336	0.905	1.614	0.698	2.06	0	1.169	1.826	1.418	0.892	1.756	0.59	1.367	0	2.12	0.842	0.632	1.55417	0.0315844	up	Ciliary neurotrophic factor receptor subunit alpha OS=Homo sapiens OX=9606 GN=CNTFR PE=1 SV=2	CNTFR
P27105	0.937	1.686	1.24	0.91	1.37	1.488	1.335	1.563	1.543	1.162	1.97	0.869	1.675	1.705	0.112	1.906	1.657	0.07	1.228	0.068	1.744	0.582	1.459	1.948	1.57	0.939	0.929	1.326	1.262	1.775	0.936754	0.612674	nosig	Stomatin OS=Homo sapiens OX=9606 GN=STOM PE=1 SV=3	STOM
P27169	1.446	1.957	1.215	1.598	1.358	1.335	1.748	1.252	1.069	1.492	2.029	1.353	1.117	1.283	0.777	1.328	1.825	0.452	0.862	0.178	1.062	0.661	1.105	1.278	1.048	1.247	1.096	1.088	1.965	1.129	0.790705	0.0294114	nosig	Serum paraoxonase/arylesterase 1 OS=Homo sapiens OX=9606 GN=PON1 PE=1 SV=3	PON1
P27348	0.997	0.569	1.243	1.167	0.66	1.001	0.508	0.907	0.131	0.508	0.413	0.572	0.545	2.038	3.75	0.942	0.407	2.394	0.412	2.57	0.599	1.103	0.851	0.771	0.48	0.665	1.972	0.881	0.536	0.523	1.45781	0.144744	nosig	14-3-3 protein theta OS=Homo sapiens OX=9606 GN=YWHAQ PE=1 SV=1	YWHAQ
P27487	0.94	0.774	0.857	0.661	1.005	0.716	0.651	0.876	0.72	0.652	1.828	0.891	1.003	1.722	0.731	0.822	1.551	1.857	1.199	1.199	1.23	1.204	1.333	1.344	1.559	1.451	1.115	1.107	1.696	1.343	1.66741	8.93E-07	up	Dipeptidyl peptidase 4 OS=Homo sapiens OX=9606 GN=DPP4 PE=1 SV=2	DPP4
P27797	0.849	0.095	0.99	1.054	1.308	0.368	0.958	1.182	0.592	0.557	0.329	0.399	0.608	0.243	2.73	0.801	0.286	2.343	0.621	3.295	1.526	1.415	0.397	0.967	0.445	0.446	1.841	1.445	0.946	0.333	1.34641	0.246097	nosig	Calreticulin OS=Homo sapiens OX=9606 GN=CALR PE=1 SV=1	CALR
P27824	1.148	1.736	1.074	1.307	1.278	1.281	1.73	1.2	1.032	0.926	1.152	0.897	1.458	1.143	0.626	1.178	1.198	1.618	1.379	1.017	1.118	0.601	1.318	1.808	0.588	1.262	1.357	1.025	0.645	1.062	0.883024	0.205078	nosig	Calnexin OS=Homo sapiens OX=9606 GN=CANX PE=1 SV=2	CANX
P27918	0.95	1.515	1.117	1.226	1.081	1.133	1.42	1.382	0.902	1.16	1.451	0.935	1.145	0.834	0.886	0.696	1.103	2.645	1.106	0.81	0.905	1.13	1.139	0.888	0.954	1.381	1.115	1.299	1.028	1.082	0.947838	0.578971	nosig	Properdin OS=Homo sapiens OX=9606 GN=CFP PE=1 SV=2	CFP
P27930	0.669	0.572	0.283	0.69	0.646	1.13	0.829	0.717	0.661	0.385	1.614	1.383	0.578	0.731	5.992	1.092	1.026	0.538	1.529	2.205	0.58	0.067	0.275	0.643	1.384	0.793	1.088	1.041	0.94	1.527	1.90109	0.0486003	up	Interleukin-1 receptor type 2 OS=Homo sapiens OX=9606 GN=IL1R2 PE=1 SV=1	IL1R2
P28062	1.279	1.573	0.885	0.537	1.407	1.803	0.887	1.05	1.585	1.263	0.864	0.934	1.031	2.233	2.305	1.575	1.071	1.235	0.848	0.526	0	0.468	1.425	1.235	1.196	0.664	1.479	1.128	0.602	1.194	0.897098	0.475266	nosig	Proteasome subunit beta type-8 OS=Homo sapiens OX=9606 GN=PSMB8 PE=1 SV=3	PSMB8
P28066	0.742	0.786	0.32	0.236	0.86	0.506	0.504	0.957	1.132	0.493	1.205	2.302	0.862	4.402	7.544	1.561	1.008	0.372	0.494	0.917	0.751	0.67	0.13	0.665	0.097	0.404	1.13	0.684	0.486	0.217	1.98141	0.126472	nosig	Proteasome subunit alpha type-5 OS=Homo sapiens OX=9606 GN=PSMA5 PE=1 SV=3	PSMA5
P28074	0	0.225	0.3	0.278	0.439	0.638	0	0.248	0	0.295	0	1.28	0.619	4.941	8.393	1.236	0.234	0.58	0.67	0.166	0.764	0	0	0.434	0.152	0	0.291	0.898	0.703	0.337	4.47751	0.0807259	nosig	Proteasome subunit beta type-5 OS=Homo sapiens OX=9606 GN=PSMB5 PE=1 SV=3	PSMB5
P28332	0.391	0.338	0.504	0.187	0	0	0	0.397	0	0	0.66	1.115	1.395	11.633	1.708	0	0.732	0	0.353	0	0	0.188	0.451	0	0.387	0.359	0	0.421	0.546	0.754	5.69675	0.151638	nosig	Alcohol dehydrogenase 6 OS=Homo sapiens OX=9606 GN=ADH6 PE=1 SV=3	ADH6
P28676	0.458	2.062	0.288	0.348	0.093	3.211	1.595	3.595	0	0	0	0.21	0.231	0.095	0.441	0.239	0.171	0.308	0.217	2.812	0	0.153	0	1.29	0.167	1.579	2.723	2.185	0.234	2.463	0.666009	0.437863	nosig	Grancalcin OS=Homo sapiens OX=9606 GN=GCA PE=1 SV=2	GCA
P28799	0.779	1.197	0.875	0.957	0.755	0.676	0.896	0.643	0.821	0.702	0.924	1.058	0.94	0.766	1.642	1.011	1.055	2.79	1.317	1.88	0.828	1.218	0.909	1.492	1.266	0.947	0.918	0.903	0.91	0.946	1.42874	0.00575207	up	Progranulin OS=Homo sapiens OX=9606 GN=GRN PE=1 SV=2	GRN
P28827	1.437	1.252	1.128	0.883	1.21	1.198	1.054	0.853	1.277	0.837	1.715	0.903	1.378	1	0.794	1.413	0.872	1.061	0.91	1.502	1.146	2.455	0.828	0.613	1.145	0.963	0.567	1.733	1.122	0.735	1.02682	0.805063	nosig	Receptor-type tyrosine-protein phosphatase mu OS=Homo sapiens OX=9606 GN=PTPRM PE=1 SV=2	PTPRM
P28838	0.27	0.519	0	0	0.927	0	0.902	0.39	0.32	0	0	0.497	0.974	2.264	3.327	0.559	0	0.425	0	0.24	0.434	0	0	0	0	0	1.075	4.482	0	0	2.14498	0.215246	nosig	Cytosol aminopeptidase OS=Homo sapiens OX=9606 GN=LAP3 PE=1 SV=3	LAP3
P28906	0.718	1.009	0.78	0.771	0.999	1.014	0.714	1.116	0.98	0.916	1.351	0.559	0.855	0.726	0.879	0.939	0.939	2.594	1.006	0.908	1.045	2.074	1.561	1.259	1.556	1.23	0.599	1.177	2.727	0.655	1.36625	0.0314645	up	Hematopoietic progenitor cell antigen CD34 OS=Homo sapiens OX=9606 GN=CD34 PE=1 SV=2	CD34
P29279	1.329	1.047	0.506	1.479	0.23	0.982	0.14	0.471	2.192	0.33	0.278	0.37	0.639	0.62	3.653	2.04	0.58	1.336	1.103	2.123	0.153	2.715	1.33	0.224	0.404	0	0	1.159	0.199	0	1.08695	0.806811	nosig	CCN family member 2 OS=Homo sapiens OX=9606 GN=CCN2 PE=1 SV=2	CCN2
P29350	0.339	0	1.17	0.158	2.137	0.399	2.046	0.505	1.284	0.283	0	1.47	0	0.482	0.824	0.7	0.405	1.434	3.109	1.616	0.238	1.477	0	0.67	0	1.242	3.134	0.365	0.541	1.066	1.12805	0.743346	nosig	Tyrosine-protein phosphatase non-receptor type 6 OS=Homo sapiens OX=9606 GN=PTPN6 PE=1 SV=1	PTPN6
P29401	0.859	0.9	1.263	0.993	0.723	1.194	1.032	1.41	0.718	1.091	0.742	1.01	0.861	2.027	3.965	0.728	0.822	1.193	0.879	1.359	0.8	0.879	0.611	0.881	0.84	1.1	1.589	1.008	0.659	0.902	1.12221	0.499131	nosig	Transketolase OS=Homo sapiens OX=9606 GN=TKT PE=1 SV=3	TKT
P29622	1.273	1.794	1.285	1.405	1.59	1.298	1.672	1.589	1.648	1.421	1.624	1.135	1.414	1.362	0.611	1.101	1.699	0.233	1.004	0.188	1.356	0.641	1.592	0.96	1.399	1.364	1.072	1.401	1.206	1.334	0.757796	0.00310506	down	Kallistatin OS=Homo sapiens OX=9606 GN=SERPINA4 PE=1 SV=3	SERPINA4
P30041	0.801	0.598	0.668	0.72	0.639	1.892	0.662	0.798	0.468	0.957	0.571	0.755	1.516	1.205	1.97	2.956	1.564	0.478	0.429	1.64	0.801	2.083	0.902	2.1	0.524	1.046	1.55	1.034	0.519	1.58	1.53743	0.0342956	up	Peroxiredoxin-6 OS=Homo sapiens OX=9606 GN=PRDX6 PE=1 SV=3	PRDX6
P30043	0.479	0.536	1.826	0.691	0.229	1.189	0.963	1.075	0.716	1.063	0.238	1.114	2.246	0.53	1.36	2.859	1.608	0.664	0.646	0.786	1.551	1.883	0.771	2.595	0.714	1.438	2.129	1.143	0.212	1.558	1.4854	0.0657562	nosig	Flavin reductase (NADPH) OS=Homo sapiens OX=9606 GN=BLVRB PE=1 SV=3	BLVRB
P30044	1.365	1.911	1.5	1.406	1.934	1.613	1.582	1.55	1.61	1.644	1.488	1.188	1.429	1.246	0.842	1.066	1.24	0.373	1.202	0.209	0.791	0.654	1.238	0.95	1.249	1.276	1.288	1.194	1.058	1.418	0.663947	5.65E-06	down	Peroxiredoxin-5, mitochondrial OS=Homo sapiens OX=9606 GN=PRDX5 PE=1 SV=4	PRDX5
P30048	1.394	1.653	1.558	0.499	0.624	0.899	0.965	0.767	0.865	0.566	2.274	1.193	3.04	0.657	1.517	0.728	0.596	0	1.383	0.695	2.603	0.42	0.603	1.62	2.082	0.704	1.4	1.934	0.689	1.075	1.28769	0.214993	nosig	Thioredoxin-dependent peroxide reductase, mitochondrial OS=Homo sapiens OX=9606 GN=PRDX3 PE=1 SV=3	PRDX3
P30050	1.304	1.209	0.979	1.378	1.152	1.418	1.112	1.187	1.038	1.352	1.105	1.06	1.118	0.62	0.758	1.523	0.791	2.405	1.402	0.872	1.491	1.028	1.327	1.094	0.955	0.84	1.247	0.832	0.939	1.006	0.923943	0.3594	nosig	60S ribosomal protein L12 OS=Homo sapiens OX=9606 GN=RPL12 PE=1 SV=1	RPL12
P30086	1.365	1.047	1.102	0.757	0.783	1.593	1.146	1.203	1.519	1.25	0.692	1.474	1.478	1.205	1.142	1.969	1.053	1.215	1.215	1.119	0.891	0.917	0.801	1.221	0.552	1.603	1.34	0.806	1.112	1.255	0.980025	0.839472	nosig	Phosphatidylethanolamine-binding protein 1 OS=Homo sapiens OX=9606 GN=PEBP1 PE=1 SV=3	PEBP1
P30101	1.01	1.161	1.15	0.943	1.17	1.283	1.327	1.114	1.122	1.102	1.097	1.094	0.794	0.649	1.399	0.737	0.915	1.223	1.296	1.727	0.918	0.816	1.009	1.293	1.264	0.912	2.23	1.176	0.84	1.02	0.984405	0.844663	nosig	Protein disulfide-isomerase A3 OS=Homo sapiens OX=9606 GN=PDIA3 PE=1 SV=4	PDIA3
P30520	0.434	0	0.794	1.418	0	0.81	0.768	0.829	0.851	0	0	1.199	0.213	1.164	0.764	0.09	0	1.174	0.588	3.658	0.404	0	0.125	0.977	0	0.401	3.004	0.959	0.751	0.63	1.36357	0.420742	nosig	Adenylosuccinate synthetase isozyme 2 OS=Homo sapiens OX=9606 GN=ADSS2 PE=1 SV=3	ADSS2
P30530	0.288	0.907	0.054	0.406	0.355	0.886	0.826	0.327	0.718	0.477	0.355	2.083	0.12	0.43	2.439	2.166	1.397	2.142	0.972	2.029	0.538	1.814	0.589	1.415	0.693	0.348	1.101	2.02	1.228	2.169	2.4836	0.000425278	up	Tyrosine-protein kinase receptor UFO OS=Homo sapiens OX=9606 GN=AXL PE=1 SV=4	AXL
P30613	1.704	1.705	1.201	1.014	1.311	1.397	1.246	1.515	1.07	1.43	1.415	0.998	1.483	0.915	1.228	1.822	1.063	0.905	1.538	0.724	1.124	0.63	1.116	0.905	1.485	1.012	0.964	0.947	1.001	1.171	0.825646	0.0274402	nosig	Pyruvate kinase PKLR OS=Homo sapiens OX=9606 GN=PKLR PE=1 SV=2	PKLR
P30626	0.361	1.443	0.962	0.967	0.645	1.307	0.642	0.744	0.48	0.362	0	0.825	0.739	0.494	3.369	1.056	0.547	0.869	0	1.919	0.407	3.664	0.68	1.013	0	0.441	0.868	1.324	0.537	1.102	1.25452	0.425894	nosig	Sorcin OS=Homo sapiens OX=9606 GN=SRI PE=1 SV=1	SRI
P30740	0.708	0.804	0.156	0.445	0.074	1.141	0.643	1.254	0.255	0.546	0.259	0.841	0.152	0.418	1.751	0.651	0.305	2.48	0.186	5.074	1.208	0.402	0.38	1.516	0.423	0.789	1.322	0.78	0.783	1.734	1.78012	0.107387	nosig	Leukocyte elastase inhibitor OS=Homo sapiens OX=9606 GN=SERPINB1 PE=1 SV=1	SERPINB1
P31146	0.447	0.797	0.904	1.222	0.797	1.21	0.944	2.032	0.786	1.456	0.093	0.659	0.902	0.812	0.581	0.47	0.987	0.488	0.736	2.919	1.172	0.597	0.625	0.621	0.441	1.902	4.821	1.273	0.24	1.632	1.03686	0.890518	nosig	Coronin-1A OS=Homo sapiens OX=9606 GN=CORO1A PE=1 SV=4	CORO1A
P31150	1.835	0	1.22	0.207	1.021	2.105	1.291	0.136	1.422	0.847	1.485	0	2.218	0.947	1.352	1.29	0	0.332	1.98	0.999	0.927	0.569	1.258	1.056	0.33	1.256	2.868	1.326	1.173	0.296	1.07408	0.792068	nosig	Rab GDP dissociation inhibitor alpha OS=Homo sapiens OX=9606 GN=GDI1 PE=1 SV=2	GDI1
P31151	0.72	1.12	0	1.165	0.71	0	0	0.591	0.631	0.729	0.317	2.194	0	0.522	0.33	0	0.567	0.356	0.626	0.36	0.27	0.315	0.56	0.39	0.329	2.446	12.194	0.204	0	0.31	1.967	0.38384	nosig	Protein S100-A7 OS=Homo sapiens OX=9606 GN=S100A7 PE=1 SV=4	S100A7
P31153	1.563	1.438	1.072	0.973	1.285	1.977	1.58	1.405	1.213	1.106	1.454	1.113	1.541	0.712	1.441	1.022	1.324	0.128	1.151	0.633	0.805	0.718	1.293	1.304	1.397	0.917	1.279	0.944	1.88	1.966	0.845651	0.134066	nosig	S-adenosylmethionine synthase isoform type-2 OS=Homo sapiens OX=9606 GN=MAT2A PE=1 SV=1	MAT2A
P31327	0.486	0.487	0.397	0.378	25.914	0.429	0.405	0.495	0.484	0.57	0.34	0.231	0.295	1.072	0.761	0.144	0.322	0.115	0.406	0.31	0	0.352	1.427	0.219	0.582	0.251	0.174	0.187	0.257	0.435	0.131137	0.332054	nosig	Carbamoyl-phosphate synthase [ammonia], mitochondrial OS=Homo sapiens OX=9606 GN=CPS1 PE=1 SV=2	CPS1
P31939	1.568	0	0.312	0.769	1.354	0.943	0.863	1.033	1.011	0.529	1.653	1.085	1.152	1.765	1.072	0.875	1.161	0.62	1.417	2.085	1.375	0.754	0.907	1.088	1.61	1.372	1.117	0.839	0	0.85	1.35988	0.110404	nosig	Bifunctional purine biosynthesis protein ATIC OS=Homo sapiens OX=9606 GN=ATIC PE=1 SV=3	ATIC
P31944	0.569	1.61	1.508	1.35	1.345	0.846	1.637	0.901	0.786	1.282	0	0.844	0.879	0.644	0.972	1.068	0.729	1.817	0.857	0.419	1.182	0.82	0	0.445	0.703	7.235	0.804	0.465	0.495	0.574	0.885246	0.70802	nosig	Caspase-14 OS=Homo sapiens OX=9606 GN=CASP14 PE=1 SV=2	CASP14
P31946	0.74	0.918	1.322	1.449	0.271	0.761	0.513	1.947	0.336	0.715	0.325	0.638	0.564	1.299	3.889	1.967	0.696	0.11	0.821	1.458	0.673	0.4	0.464	1.304	0.397	0.959	4.202	1.827	0.699	1.642	1.35611	0.291929	nosig	14-3-3 protein beta/alpha OS=Homo sapiens OX=9606 GN=YWHAB PE=1 SV=3	YWHAB
P31948	0.789	0	0.934	0.525	0.699	0.847	0.607	0.673	0	0.78	0	0.951	0.804	0.075	0.331	0.887	1.631	0.783	0	3.621	1.378	2.36	0.802	1.268	0.292	0.642	2.599	0.472	0.37	0.551	1.6926	0.0961706	nosig	Stress-induced-phosphoprotein 1 OS=Homo sapiens OX=9606 GN=STIP1 PE=1 SV=1	STIP1
P31995	1.013	1.075	1.615	1.105	1.163	1.408	1.579	1.724	0.594	1.499	1.455	0.929	1.042	1.347	0.555	1.024	0.918	1.32	1.321	0.838	0.617	1.133	0.921	0.79	1.752	1.162	0.848	1.896	1.625	1.194	0.887945	0.307619	nosig	Low affinity immunoglobulin gamma Fc region receptor II-c OS=Homo sapiens OX=9606 GN=FCGR2C PE=1 SV=1	FCGR2C
P32004	1.214	1.389	0.92	1.183	0.909	1.527	0.968	1.04	0.989	1.073	1.479	0.76	1.332	0.186	1.297	0.65	1.468	2.68	0.973	0.928	0.924	1.508	0.489	0.966	1.636	0.839	1.139	1.552	0.812	1.064	1.01151	0.924441	nosig	Neural cell adhesion molecule L1 OS=Homo sapiens OX=9606 GN=L1CAM PE=1 SV=2	L1CAM
P32119	0.666	0.792	1.321	0.782	0.392	1.587	0.848	0.848	0.354	1.08	0.402	0.934	2.267	0.523	1	4.402	1.404	0.628	0.691	0.529	1.244	2.367	0.72	2.258	0.573	1.176	2.125	1.077	0.309	1.918	1.53097	0.0791167	nosig	Peroxiredoxin-2 OS=Homo sapiens OX=9606 GN=PRDX2 PE=1 SV=5	PRDX2
P32942	0.789	0.888	0.803	0.99	0.973	0.776	0.922	1.068	0.83	0.878	1.272	0.794	1.139	1.074	0.934	1.096	0.924	2.969	1.487	1.948	0.848	1.434	0.833	0.937	0.837	0.657	0.9	1.163	1.031	0.891	1.29909	0.0369582	nosig	Intercellular adhesion molecule 3 OS=Homo sapiens OX=9606 GN=ICAM3 PE=1 SV=2	ICAM3
P33151	1.241	1.39	1.179	1.169	1.124	1.152	1.11	1.06	1.379	1.267	1.179	1.01	1.32	1.105	0.679	1.265	1.383	0.538	1.113	1.192	1.215	2.013	1.13	1.051	0.889	1.29	1.116	1.561	1.075	0.827	0.950667	0.45217	nosig	Cadherin-5 OS=Homo sapiens OX=9606 GN=CDH5 PE=1 SV=5	CDH5
P33908	1.184	1.379	1.449	0.953	1.175	1.264	1.077	1.141	1.232	1.013	1.266	1.387	1.34	0.871	0.979	1.466	1.211	1.011	1.059	0.966	1.113	1.206	1.333	1.161	1.293	0.953	1.073	1.183	1.229	1.315	0.986559	0.795945	nosig	Mannosyl-oligosaccharide 1,2-alpha-mannosidase IA OS=Homo sapiens OX=9606 GN=MAN1A1 PE=1 SV=3	MAN1A1
P34059	0.955	0.546	0	0	0	0	0.3	0	0.246	1.659	1.712	1.089	2.421	3.347	0	0.976	2.96	0	0	0.224	0	0	1.188	0.942	0	2.513	0.657	0.587	0.88	0.557	2.70548	0.0404885	up	N-acetylgalactosamine-6-sulfatase OS=Homo sapiens OX=9606 GN=GALNS PE=1 SV=1	GALNS
P34096	1.662	0.861	1.194	1.071	0.962	1.368	1.105	1.293	1.08	1.588	0.883	0.942	1.114	0.962	1.031	0.95	1.35	1.202	0.989	0.787	2.057	0.887	1.32	1.139	1.191	1.921	1.17	1.108	0.991	1.224	0.952807	0.603553	nosig	Ribonuclease 4 OS=Homo sapiens OX=9606 GN=RNASE4 PE=1 SV=3	RNASE4
P34896	0.908	1.271	0.817	1.019	3.81	0.67	0.645	0.753	0.83	1.181	1.031	1.016	0.992	1.31	3.471	0.652	1.031	1.89	1.008	0.793	1.413	0.952	0.835	0.696	1.222	0.701	0.598	0.873	0.706	0.847	0.925613	0.792818	nosig	Serine hydroxymethyltransferase, cytosolic OS=Homo sapiens OX=9606 GN=SHMT1 PE=1 SV=1	SHMT1
P34932	0.493	0.488	0.401	0.356	0.584	0.459	0.25	0.493	0.045	0.423	0.345	0.752	0.3	1.53	13.685	0.362	0.096	0.338	0.055	2.001	0.279	0.893	0.815	0.453	0.377	0.259	0.735	0.452	0.097	0.284	3.01954	0.241759	nosig	Heat shock 70 kDa protein 4 OS=Homo sapiens OX=9606 GN=HSPA4 PE=1 SV=4	HSPA4
P35052	1.063	0.51	0.904	0.907	0.275	0.229	1.584	1.097	1.613	0.674	1.105	0.944	0.618	0.97	1.68	1.735	0.219	1.219	1.151	1.634	0.623	2.126	0.472	1.271	0.418	5.829	0.632	0.403	0.689	0.213	1.35225	0.32558	nosig	Glypican-1 OS=Homo sapiens OX=9606 GN=GPC1 PE=1 SV=2	GPC1
P35443	0.965	0.46	0.735	0.466	0.524	1.025	0.452	0.642	0.775	0.931	0.641	0.448	1.18	0.803	0.73	0.64	1.17	2.795	1.367	2.217	0.738	1.619	1.2	1.604	0.802	0.95	0.948	1.202	2.588	0.99	1.76573	0.00268147	up	Thrombospondin-4 OS=Homo sapiens OX=9606 GN=THBS4 PE=1 SV=2	THBS4
P35527	1.188	1.016	1.472	1.319	0.916	1.794	1.352	0.92	2.287	1.374	0.628	0.979	1.03	0.691	0.52	1.413	0.655	0.639	1.456	0.461	0.89	0.783	1.168	0.678	0.695	6.792	1.112	0.703	0.675	0.888	0.837953	0.511204	nosig	Keratin, type I cytoskeletal 9 OS=Homo sapiens OX=9606 GN=KRT9 PE=1 SV=3	KRT9
P35555	1.215	1.14	0.963	1.468	1.049	0.821	1.101	1.181	1.367	1.439	1.1	0.873	0.998	1.032	1.143	1.15	1.65	2.116	0.949	1.034	1.25	1.166	1.12	0.67	1.107	1.077	0.862	1.015	1.34	0.934	0.961597	0.638164	nosig	Fibrillin-1 OS=Homo sapiens OX=9606 GN=FBN1 PE=1 SV=4	FBN1
P35573	0	1.644	2.7	1.169	0.251	0	0	1.822	1.733	1.551	0	0.127	0.051	3.745	0	0.083	0.086	0	0.085	0.739	0	0.022	2.425	0.059	4.974	0	0.139	1.883	1.698	0.117	0.746688	0.537484	nosig	Glycogen debranching enzyme OS=Homo sapiens OX=9606 GN=AGL PE=1 SV=3	AGL
P35579	0.774	0.498	1.779	1.705	0.351	0.624	1.546	0.638	0.467	1.026	0.887	1.11	0.634	1.463	1.833	0.843	0.874	1.182	1.245	2.305	1.162	1.22	1.524	0.745	1.119	1.409	1.156	0.753	0.768	0.801	1.22412	0.296603	nosig	Myosin-9 OS=Homo sapiens OX=9606 GN=MYH9 PE=1 SV=4	MYH9
P35590	1.208	1.031	0.604	1.468	1.346	1.364	0.349	1.214	1.166	1.363	1.04	1.312	1.315	0.555	1.191	1.507	1.164	2.329	0.97	2.133	0.907	0.702	0.963	0.369	0.837	0.562	0.507	1.323	0.844	1.091	0.97278	0.851441	nosig	Tyrosine-protein kinase receptor Tie-1 OS=Homo sapiens OX=9606 GN=TIE1 PE=1 SV=1	TIE1
P35609	2.884	0	0.053	0.179	0.357	0	0.226	0	0.355	0.526	0.061	0.02	0.29	0.455	0	0.596	0.54	1.604	0	0.141	0.174	0.466	20.599	0.38	0.036	0.836	0.4	0.069	0.063	0.022	2.92052	0.413121	nosig	Alpha-actinin-2 OS=Homo sapiens OX=9606 GN=ACTN2 PE=1 SV=1	ACTN2
P35858	1.406	1.812	1.325	1.127	1.545	1.718	1.561	0.9	1.394	1.33	1.297	1.394	1.255	1.151	0.991	0.837	1.496	0.487	0.951	0.426	1.022	0.645	1.663	1.362	1.506	1.073	1.2	1.265	1.232	1.543	0.807338	0.0263778	nosig	Insulin-like growth factor-binding protein complex acid labile subunit OS=Homo sapiens OX=9606 GN=IGFALS PE=1 SV=1	IGFALS
P35908	0.855	1.644	2.125	1.453	1.403	1.091	1.367	1.141	1.063	1.197	0.87	0.789	1.014	1.133	1.082	1.803	0.815	1.261	1.764	0.564	1.436	0.6	1.097	0.966	0.841	3.469	0.595	0.609	0.786	1.018	0.843841	0.270371	nosig	Keratin, type II cytoskeletal 2 epidermal OS=Homo sapiens OX=9606 GN=KRT2 PE=1 SV=2	KRT2
P35968	1.19	1.011	1.352	0.811	1.305	1.947	0.862	1.941	1.425	1.067	0.967	1.229	0.524	1.034	0.787	1.204	1.339	2.13	1.195	1.148	1.395	0.869	1.504	0.726	0.621	1.075	0.565	1.007	1.001	1.33	0.838432	0.184943	nosig	Vascular endothelial growth factor receptor 2 OS=Homo sapiens OX=9606 GN=KDR PE=1 SV=2	KDR
P36952	0	1.106	0.628	1.514	0	0	1.222	0	1.24	1.152	1.079	0.557	0.739	1.006	1.782	0.645	1.11	0.407	0.707	0	0	1.267	0.837	0	1.487	1.023	1.061	4.313	0	0	1.31303	0.470003	nosig	Serpin B5 OS=Homo sapiens OX=9606 GN=SERPINB5 PE=1 SV=2	SERPINB5
P36955	1.269	1.028	1.12	0.89	1.021	1.05	1.517	1.171	1.048	0.989	1.196	1.134	1.081	1.089	0.931	1.142	1.437	1.138	1.104	0.943	1.734	1.154	1.282	1.159	1.354	1.08	1.024	1.316	1.556	1.179	1.08228	0.214333	nosig	Pigment epithelium-derived factor OS=Homo sapiens OX=9606 GN=SERPINF1 PE=1 SV=4	SERPINF1
P36959	1.369	1.329	0.911	1.184	1.275	1.766	1.074	1.291	1.088	1.197	1.268	1.154	1.741	0.754	1.229	1.2	1.27	1.185	1.572	0.62	0.813	1.019	1.3	0.895	1.3	0.618	1.024	1.36	1.223	1.746	0.932834	0.417118	nosig	GMP reductase 1 OS=Homo sapiens OX=9606 GN=GMPR PE=1 SV=1	GMPR
P36980	2.172	1.576	1.001	0.823	0.932	0.982	2.436	0.914	2.25	2.11	1.562	1.43	0.729	0.589	0.661	1.829	0.762	0.29	0.872	0.129	0.889	1.63	1.754	0.601	1.916	1.737	1.65	1.612	0.669	0.754	0.726013	0.107527	nosig	Complement factor H-related protein 2 OS=Homo sapiens OX=9606 GN=CFHR2 PE=1 SV=1	CFHR2
P37802	0.899	0.341	1.107	0.868	0.613	0.443	0.859	0.79	0.673	0.882	0.328	1.911	0.175	0.376	1.338	0.232	0.081	2.78	0.735	4.073	0.834	2.5	0.319	1.484	0.505	0.518	1.113	0.496	0.708	0.132	1.38047	0.261369	nosig	Transgelin-2 OS=Homo sapiens OX=9606 GN=TAGLN2 PE=1 SV=3	TAGLN2
P37837	1.429	1.056	1.285	0.949	1.014	2.544	1.355	1.169	1.486	1.112	1.455	1.481	1.792	0.944	0.693	1.858	1.214	0.175	1.982	0.369	0.856	0.477	1.305	1.275	1.156	1.242	1.759	1.131	1.177	1.548	0.891447	0.436529	nosig	Transaldolase OS=Homo sapiens OX=9606 GN=TALDO1 PE=1 SV=2	TALDO1
P39060	1.086	0.972	0.569	0.927	0.879	1.23	1.187	1.35	1.214	1.434	1.055	1.715	1.118	1.307	0.932	1.388	1.264	0.996	1.288	0.968	1.679	0.816	1.482	1.183	1.392	1.223	0.698	0.831	1.382	1.781	1.12915	0.198603	nosig	Collagen alpha-1(XVIII) chain OS=Homo sapiens OX=9606 GN=COL18A1 PE=1 SV=5	COL18A1
P40121	0.909	2.031	1.086	0.962	1.507	2.524	2.048	1.732	1.584	0.746	0	0.735	0.427	0.989	0.746	1.062	1.209	0.255	0.747	0.978	0.673	0.811	1.289	1.487	0	0.777	1.829	1.104	1.481	2.018	0.615275	0.0172852	down	Macrophage-capping protein OS=Homo sapiens OX=9606 GN=CAPG PE=1 SV=2	CAPG
P40189	0.647	0.637	0.53	0.684	0.664	0.603	0.512	0.769	0.528	0.598	0.976	1.228	1.358	0.775	0.72	1.197	0.987	1.957	0.831	3.231	1.592	0.893	1.221	1.385	0.884	0.893	0.976	1.175	1.718	0.745	2.00437	0.000127903	up	Interleukin-6 receptor subunit beta OS=Homo sapiens OX=9606 GN=IL6ST PE=1 SV=2	IL6ST
P40197	1.432	2.168	1.973	1.387	1.18	1.941	1.167	1.7	2.301	1.244	0.363	0.516	0.401	1.734	0.269	0.573	0.572	0.628	2.781	1.394	0.74	1.26	0.698	1.222	0.31	0.822	0.162	0.66	2.573	1.302	0.575396	0.00254344	down	Platelet glycoprotein V OS=Homo sapiens OX=9606 GN=GP5 PE=1 SV=1	GP5
P40394	0.138	0.651	0.212	0.194	4.271	0.185	0.184	0.653	0.218	0.224	0.393	3.212	0.609	14.441	1.236	0.67	2.01	0.907	0.434	0.376	0.268	0.155	0.359	0.445	0.257	0.425	0.496	0.334	0.603	0.895	2.05808	0.37345	nosig	All-trans-retinol dehydrogenase [NAD(+)] ADH7 OS=Homo sapiens OX=9606 GN=ADH7 PE=1 SV=2	ADH7
P40967	0.44	0.739	0.652	0.544	1.125	1.219	0.556	0.58	0.426	0.427	2.864	0.461	0.451	0.777	1.104	0.227	0.855	2.386	0.333	1.209	1.649	3.16	0.85	1.427	1.731	0.971	0.854	1.769	2.219	0.576	1.92852	0.00619187	up	Melanocyte protein PMEL OS=Homo sapiens OX=9606 GN=PMEL PE=1 SV=2	PMEL
P41218	1.438	1.232	1.118	2.225	1.473	1.98	1.032	2.711	1.299	0.511	0.522	0.631	0.853	0.719	0.661	0.804	0.709	0.46	0.722	1.803	0.601	0.456	1.107	1.281	0.914	1.279	3.049	0.789	0.735	1.684	0.658466	0.0506005	nosig	Myeloid cell nuclear differentiation antigen OS=Homo sapiens OX=9606 GN=MNDA PE=1 SV=1	MNDA
P41222	0.649	0.899	0.624	1.015	1.022	0.746	0.855	1.066	0.788	1.044	0.759	1.255	1.286	0.864	0.944	1.105	1.461	2.044	0.879	0.909	2.324	1.157	1.337	1.841	1.088	1.173	1.093	1.494	1.345	1.107	1.46216	0.000624084	up	Prostaglandin-H2 D-isomerase OS=Homo sapiens OX=9606 GN=PTGDS PE=1 SV=1	PTGDS
P42126	0.281	0	0.261	0.313	0.317	0	0.32	0.247	0.322	0.293	0.306	1.549	0.183	4.818	2.827	0.254	0.241	3.169	0.249	4.213	0.396	0.667	0.315	0.459	0.251	0.229	0.369	0.539	0	0.186	4.50722	0.0212409	up	Enoyl-CoA delta isomerase 1, mitochondrial OS=Homo sapiens OX=9606 GN=ECI1 PE=1 SV=1	ECI1
P42357	1.037	1.293	1.178	1.328	1.238	1.094	1.336	0.883	1.063	1.039	1.24	0.852	0.961	0.788	0	3.084	1.509	0.427	0.992	0	1.309	0.641	1.63	1.086	1.463	3.452	0.784	1.403	0.931	1.068	1.02794	0.870263	nosig	Histidine ammonia-lyase OS=Homo sapiens OX=9606 GN=HAL PE=1 SV=1	HAL
P42566	0.383	0	0.526	0.503	0	0.452	0.387	0.767	0.281	0.441	0	1.836	0	0.36	0.632	0	0	0	0	4.002	0	1.287	0	0.927	0	0	1.453	0.73	0.483	0.26	1.60027	0.341465	nosig	Epidermal growth factor receptor substrate 15 OS=Homo sapiens OX=9606 GN=EPS15 PE=1 SV=2	EPS15
P42765	0.427	0.32	0.216	0.371	3.242	0.295	0	0.401	0	1.481	0.476	0.424	0.443	0.701	12.302	0.457	0.399	0.005	0.516	0.653	0.861	0.947	0.104	0.616	0.852	0.421	0.467	0.43	0.428	0.396	1.62135	0.536478	nosig	3-ketoacyl-CoA thiolase, mitochondrial OS=Homo sapiens OX=9606 GN=ACAA2 PE=1 SV=2	ACAA2
P42768	0.714	0.356	0.459	0.55	0.294	0.544	0.75	0.987	0.475	0.749	0.462	1.619	0.762	0.458	4.53	1.898	0.536	1.116	0.913	3.072	0.9	1.458	0.992	0.876	0.416	0.525	1.423	0.862	0.572	0.518	2.03368	0.0172518	up	Wiskott-Aldrich syndrome protein OS=Homo sapiens OX=9606 GN=WAS PE=1 SV=4	WAS
P42785	0.812	1.085	0.49	0.933	0.902	0.844	1.266	0.283	0.731	0.792	1.441	1.83	0.832	1.99	1.14	1.341	1.417	1.04	1.145	1.483	1.289	0.776	1.434	1.318	0.545	1.629	0.886	0.992	1.811	1.681	1.59867	0.000575553	up	Lysosomal Pro-X carboxypeptidase OS=Homo sapiens OX=9606 GN=PRCP PE=1 SV=1	PRCP
P43121	0.777	0.354	0.621	1.319	0.98	0.647	0.978	0.745	0.789	0.637	1.264	0.692	1.244	0.679	1.158	0.991	0.569	3.396	0.5	2.051	1.2	2.54	0.694	0.937	1.116	0.683	0.692	0.861	1.087	0.775	1.47375	0.0507763	nosig	Cell surface glycoprotein MUC18 OS=Homo sapiens OX=9606 GN=MCAM PE=1 SV=2	MCAM
P43251	1.341	1.561	1.29	1.557	1.341	1.446	1.485	1.25	1.123	1.261	1.523	1.081	1.199	1.316	0.825	0.987	1.7	0.931	1.049	0.493	0.987	0.835	1.243	1.002	1.555	1.285	1.113	0.99	1.297	1.369	0.834127	0.00715262	nosig	Biotinidase OS=Homo sapiens OX=9606 GN=BTD PE=1 SV=2	BTD
P43652	1.174	1.699	1.214	1.407	1.258	1.347	1.299	1.369	1.133	1.296	1.225	1.23	1.648	1.138	0.849	0.901	1.532	0.904	1.063	0.432	1.067	0.992	1.3	1.002	1.594	1.322	1.303	0.921	1.6	1.195	0.879736	0.0692757	nosig	Afamin OS=Homo sapiens OX=9606 GN=AFM PE=1 SV=1	AFM
P45877	0.221	0.959	1.508	0.365	0.303	0.786	1.018	1.108	1.052	0.805	1.401	1.245	1.634	1.256	1.233	1.229	1.744	0.338	1.597	0.547	0.737	2.172	1.733	1.781	1.577	1.299	0.758	2.088	2.029	0.995	1.68572	0.00379192	up	Peptidyl-prolyl cis-trans isomerase C OS=Homo sapiens OX=9606 GN=PPIC PE=1 SV=1	PPIC
P46531	0.905	1.258	0	0.6	0.997	1.661	0.756	1.124	0.771	0	0.509	1.032	0.766	1.072	0.413	1.522	1.467	1.952	1.455	1.065	0.839	1.811	0.705	1.566	0.586	1.022	1.644	1.531	1.008	1.41	1.44791	0.0786674	nosig	Neurogenic locus notch homolog protein 1 OS=Homo sapiens OX=9606 GN=NOTCH1 PE=1 SV=4	NOTCH1
P46926	1.198	1.284	0.876	1.172	1.213	1.02	1.34	0.835	1.459	0.989	0.897	0.974	1.249	1.033	2.585	0.866	1.151	1.422	0.746	0.951	0.927	1.355	1.161	0.831	1.07	1.096	0.869	1.677	0.776	1.17	1.00149	0.988044	nosig	Glucosamine-6-phosphate isomerase 1 OS=Homo sapiens OX=9606 GN=GNPDA1 PE=1 SV=1	GNPDA1
P46940	4.075	3.135	0.79	1.693	4.46	1.003	0.452	0.717	0.3	2.576	0.195	0	0.233	0.229	2.801	0.049	0.048	0.556	0.498	1.197	0.211	0.919	0.39	0.281	0	0.41	3.356	0.222	0	0.446	0.313551	0.0278001	down	Ras GTPase-activating-like protein IQGAP1 OS=Homo sapiens OX=9606 GN=IQGAP1 PE=1 SV=1	IQGAP1
P47929	1.186	1.466	1.088	0.833	1.74	1.236	1.219	1.114	1.286	1.063	1.273	1.047	1.538	1.132	0.693	1.09	1.228	0	1.116	0.294	1.375	0.846	1.148	0.897	0.97	5.254	0.74	1.014	1.065	0.932	0.966887	0.8679	nosig	Galectin-7 OS=Homo sapiens OX=9606 GN=LGALS7 PE=1 SV=2	LGALS7
P48163	2.03	0.669	1.23	1.009	1.546	1.232	1.889	1.444	1.131	2.017	0	2.277	1.386	2.352	2.842	0.385	1.11	1.463	0.565	0	0.612	0.455	0.697	1.06	0.877	0.748	0.674	0.931	0.595	0.206	0.677432	0.0510334	nosig	NADP-dependent malic enzyme OS=Homo sapiens OX=9606 GN=ME1 PE=1 SV=1	ME1
P48506	0.584	0.079	0.876	0	0.499	0.654	0.668	0.141	0.148	0.107	0.093	1.9	1.71	3.309	9.329	2.503	0.249	0.714	0.107	0.854	0.317	1.021	0.407	0.906	0.088	0.583	0.853	0.572	0.452	0.204	3.48389	0.062551	nosig	Glutamate--cysteine ligase catalytic subunit OS=Homo sapiens OX=9606 GN=GCLC PE=1 SV=2	GCLC
P48507	1.847	1.546	1.797	0.992	1.832	2.262	1.413	1.571	1.277	1.314	1.538	1.028	1.134	0.833	1.006	0.675	0.858	0	1.304	0	1.617	0.863	1.07	1.213	1.186	1.096	0.928	1.094	0.746	1.349	0.616302	0.000500905	down	Glutamate--cysteine ligase regulatory subunit OS=Homo sapiens OX=9606 GN=GCLM PE=1 SV=1	GCLM
P48594	1.582	0.49	0.965	1.245	1.472	3.366	1.249	1.02	1.833	1.117	1.187	1.16	1.444	1.299	0.59	1.656	1.103	0.474	3.157	0.687	0.583	0.491	1.8	0.278	0.62	0.784	1.808	0.966	1.411	0.953	0.782865	0.291724	nosig	Serpin B4 OS=Homo sapiens OX=9606 GN=SERPINB4 PE=1 SV=2	SERPINB4
P48637	1.012	0.383	0.475	0.575	0.756	1.544	0.904	0.53	0.473	0.248	0.748	1.115	1.237	1.995	2.296	0.719	0.623	2.475	1.341	2.444	0.903	1.033	0.668	0.974	1.001	0.754	0.93	0.753	1.045	1.107	1.7508	0.00786715	up	Glutathione synthetase OS=Homo sapiens OX=9606 GN=GSS PE=1 SV=1	GSS
P48643	2.725	0.468	1.232	0.634	0.32	0.543	0.897	0.978	0.476	0.682	0.071	2.249	0.233	0	0.925	3.529	0.951	2.452	0.302	0.765	0.186	1.037	1.097	0.965	0.895	0.193	2.517	1.344	2.57	1.55	1.3306	0.354613	nosig	T-complex protein 1 subunit epsilon OS=Homo sapiens OX=9606 GN=CCT5 PE=1 SV=1	CCT5
P48668	1.194	0.888	0.884	0.924	1.523	1.077	1.947	1.019	4.636	0.624	1.257	0.846	0.933	0.368	0.587	0.965	0	0.688	1.274	1.176	0.844	0.917	0.899	0.334	0.946	5.252	0.234	0.748	0.168	1.291	0.670257	0.287548	nosig	Keratin, type II cytoskeletal 6C OS=Homo sapiens OX=9606 GN=KRT6C PE=1 SV=3	KRT6C
P48740	1.332	1.256	1.284	1.031	1.049	1.245	1.154	1.202	1.14	1.075	1.054	1.137	0.835	1.254	0.992	0.979	1.374	1.788	1.136	1.204	1.341	0.833	1.195	1.195	1.001	1.003	1.268	0.766	1.139	1.19	0.9638	0.486471	nosig	Mannan-binding lectin serine protease 1 OS=Homo sapiens OX=9606 GN=MASP1 PE=1 SV=3	MASP1
P48960	1.149	1.572	0.421	0	0.144	0.645	1.5	0.96	1.059	0.299	1.902	1.898	1.796	0.085	0.861	1.745	0.593	0.772	0.765	2.328	1.105	2.291	0.473	0.584	1.707	0.977	0.55	1.858	0.473	1.088	1.53897	0.0864995	nosig	Adhesion G protein-coupled receptor E5 OS=Homo sapiens OX=9606 GN=ADGRE5 PE=1 SV=4	ADGRE5
P49247	0.083	0.996	1.65	0.834	1.694	0.674	1.817	0.587	0.753	1.143	1.554	0.717	1.544	2.084	1.926	0.906	1.491	0.31	1.889	0.296	0.98	0.804	1.998	0.617	1.706	1.311	1.212	1.581	1.366	1.936	1.28179	0.198686	nosig	Ribose-5-phosphate isomerase OS=Homo sapiens OX=9606 GN=RPIA PE=1 SV=3	RPIA
P49257	2.347	1.409	1.618	4.301	0.623	0.359	0.928	2.25	0	0.88	0.518	2.155	0.915	0.223	0.365	0.619	0.338	0.763	1.17	1.362	0.295	0.283	0.289	4.225	1.375	0.812	0.897	0.561	0.821	1.051	0.646857	0.263344	nosig	Protein ERGIC-53 OS=Homo sapiens OX=9606 GN=LMAN1 PE=1 SV=2	LMAN1
P49321	1.478	1.46	1.646	1.198	1.007	1.514	2.036	1.174	1.647	0.947	1.287	1.07	0.907	0.971	0.92	0.878	1.181	0.673	1.016	0.368	1.062	0.768	1.165	1.197	1.638	1.577	1.18	1.74	1.545	1.451	0.800808	0.0447446	nosig	Nuclear autoantigenic sperm protein OS=Homo sapiens OX=9606 GN=NASP PE=1 SV=2	NASP
P49327	8.745	0.371	1.717	0.244	2.457	0.673	0.183	0.449	0.67	3.898	0.477	0.656	0	1.264	0.452	0.391	0.194	1.649	0.198	2.948	0.17	0.215	0.556	0.579	0.326	0.901	0.3	0.139	0.849	0.153	0.31991	0.15677	nosig	Fatty acid synthase OS=Homo sapiens OX=9606 GN=FASN PE=1 SV=3	FASN
P49721	0.2	0.331	1.407	1.399	1.583	0.358	1.298	0.345	0.335	1.192	1.532	1.21	1.576	2.136	3.758	1.107	2.052	0.376	1.696	0.881	1.289	1.043	1.007	0.989	1.078	0.52	0.971	0.71	0.973	1.07	1.53729	0.0752479	nosig	Proteasome subunit beta type-2 OS=Homo sapiens OX=9606 GN=PSMB2 PE=1 SV=1	PSMB2
P49746	0.124	0.411	1.274	0.337	0.305	1.923	0.306	0.502	0.249	0.601	0.211	0.179	1.585	0	0	1.303	0.36	1.01	0.54	1.009	0.705	1.667	1.284	0.987	0.219	13.189	0	0.32	0.01	0.171	2.05148	0.350826	nosig	Thrombospondin-3 OS=Homo sapiens OX=9606 GN=THBS3 PE=1 SV=1	THBS3
P49747	1.183	0.637	1.063	0.888	0.963	1.394	0.92	1.012	0.816	1.138	1.573	0.403	0.924	0.722	0.968	0.772	1.068	2.75	0.982	1.146	1.171	1.717	0.919	1.218	1.174	1.025	0.846	1.348	1.509	1.136	1.16692	0.196853	nosig	Cartilage oligomeric matrix protein OS=Homo sapiens OX=9606 GN=COMP PE=1 SV=2	COMP
P49767	1.564	0	2.097	0	1.409	1.166	0	0	2.258	0	0	0	0.52	1.649	0.557	0	0	0.735	1.999	0.517	0.72	0.938	0	0.16	0.98	0	0	0.893	1.693	0	0.668766	0.411273	nosig	Vascular endothelial growth factor C OS=Homo sapiens OX=9606 GN=VEGFC PE=1 SV=1	VEGFC
P49908	1.309	1.197	1.254	1.234	1.263	1.305	1.794	1.457	1.217	1.202	1.83	0.878	1.437	1.184	0.774	1.249	1.246	0.83	1.232	0.513	1.129	1.066	1.167	1.884	1.09	0.908	0.811	1.434	1.098	1.298	0.871297	0.0820093	nosig	Selenoprotein P OS=Homo sapiens OX=9606 GN=SELENOP PE=1 SV=3	SELENOP
P49913	0.835	1.23	0.48	1.079	0.289	1.628	1.283	0.593	0.549	1.217	1.329	2.47	0.953	1.548	0.798	1.439	0.924	1.021	1.384	1.298	1.041	1.479	0.785	2.149	0.677	0.625	1.288	0.635	1.371	1.919	1.36845	0.0697148	nosig	Cathelicidin antimicrobial peptide OS=Homo sapiens OX=9606 GN=CAMP PE=1 SV=1	CAMP
P50238	1.806	3.058	1.914	0	1.051	1.118	1.025	1.025	1.239	2.007	0	0.897	1.818	0.9	0	0.799	0.755	0.457	1.705	0	0.574	0.475	0	1.018	0	1.965	2.389	0.192	0.784	1.475	0.568806	0.0612093	nosig	Cysteine-rich protein 1 OS=Homo sapiens OX=9606 GN=CRIP1 PE=1 SV=3	CRIP1
P50395	1.381	1.336	1.468	1.265	1.242	1.415	1.282	1.186	1.306	1.8	1.304	1.412	1.548	1.444	1.398	1.043	0.854	0.915	0.876	0.458	0.505	1.249	0.782	2.046	1.341	1.018	1.028	1.081	0.998	0.933	0.81255	0.0151119	nosig	Rab GDP dissociation inhibitor beta OS=Homo sapiens OX=9606 GN=GDI2 PE=1 SV=2	GDI2
P50502	0.518	0.704	1.032	0.935	0.629	0.838	0.827	0.61	0.695	1.328	0.165	1.088	1.105	1.057	3.304	2.019	1.232	0.468	0.282	2.936	0.393	2.124	0.747	1.019	0.295	0.734	1.63	0.856	0.199	1.19	1.40728	0.129081	nosig	Hsc70-interacting protein OS=Homo sapiens OX=9606 GN=ST13 PE=1 SV=2	ST13
P50552	1.019	0.984	1.047	1.217	0.932	1.128	1.131	1.27	0.858	1.278	0.81	1.729	0.766	0.994	0.598	0.964	0.799	0.861	1.327	2.225	0.65	2.306	0.749	1.188	0.848	0.993	1.484	1	0.762	1.046	1.01707	0.875899	nosig	Vasodilator-stimulated phosphoprotein OS=Homo sapiens OX=9606 GN=VASP PE=1 SV=3	VASP
P50991	0	0	1.14	0	1.042	1.15	0.124	0.163	0	0	0.023	0.182	0	0.102	0.049	3.223	1.18	5.122	0.718	0	0.376	0	1.041	0.426	0	0.081	3.095	1.832	0	0.205	2.43921	0.153185	nosig	T-complex protein 1 subunit delta OS=Homo sapiens OX=9606 GN=CCT4 PE=1 SV=4	CCT4
P51003	0.457	0.805	0.71	0.653	0.418	0.632	6.819	0.738	0.964	0.869	0.688	7.889	0.444	0.384	0.188	0.231	5.306	0.117	0.542	0.156	0.311	0.418	0.469	0.322	0.483	0.791	0.227	0.419	0.483	5.538	0.972292	0.963779	nosig	Poly(A) polymerase alpha OS=Homo sapiens OX=9606 GN=PAPOLA PE=1 SV=4	PAPOLA
P51148	0	1.301	0.899	1.168	1.026	0.93	0.811	0.835	0	1.174	0	0.167	1.596	1.135	1.642	1.445	1.772	0.811	1.113	0.774	0	0	1.646	0	0	0.917	1.927	1.056	0	1.581	1.07944	0.766448	nosig	Ras-related protein Rab-5C OS=Homo sapiens OX=9606 GN=RAB5C PE=1 SV=2	RAB5C
P51149	0	0.016	0.575	0	0	0.907	0.388	0.811	0	0	0.133	1.828	0.005	0	0.691	0	0.01	0.135	0	4.288	0	1.591	0	0.967	0	0	1.022	0.465	0.037	0	2.07119	0.278885	nosig	Ras-related protein Rab-7a OS=Homo sapiens OX=9606 GN=RAB7A PE=1 SV=1	RAB7A
P51858	1.937	1.58	1.597	0.723	1.284	1.584	1.321	1.657	1.399	0.991	0.988	1.063	1.083	0.94	1.093	1.105	1.109	1.172	1.279	0.628	1.139	0.484	1.514	0.943	1.782	1.023	1.025	0.973	1.376	1.362	0.784516	0.0310568	nosig	Hepatoma-derived growth factor OS=Homo sapiens OX=9606 GN=HDGF PE=1 SV=1	HDGF
P51884	1.134	0.941	1.176	0.867	1.029	1.007	0.9	0.953	0.908	0.812	1.205	0.769	0.913	1.141	0.785	1.069	1.328	1.479	1.151	1.092	1.051	1.607	1.14	1.546	1.723	1.22	0.993	1.424	1.961	1.052	1.26704	0.00264402	nosig	Lumican OS=Homo sapiens OX=9606 GN=LUM PE=1 SV=2	LUM
P52209	0.763	0.912	0.814	0.802	0.229	1.134	0.709	1.528	0.722	0.956	0.184	0.894	1.251	1.565	1.271	1.227	1.059	0.667	0.447	1.741	1.77	1.336	0.267	1.451	0.531	1.263	3.449	2.012	0.372	2.042	1.44702	0.0676161	nosig	6-phosphogluconate dehydrogenase, decarboxylating OS=Homo sapiens OX=9606 GN=PGD PE=1 SV=3	PGD
P52566	1.121	0.795	0.468	1.592	0.789	1.356	0.89	1.029	0.892	1.216	0.908	1.187	0.837	0.553	0.804	0.935	0.632	1.01	1.218	2.178	1.007	2.947	0.696	1.011	0.677	1.427	1.214	1.395	0.943	0.74	1.09967	0.537813	nosig	Rho GDP-dissociation inhibitor 2 OS=Homo sapiens OX=9606 GN=ARHGDIB PE=1 SV=3	ARHGDIB
P52597	0.572	0	1.169	0.496	0.794	0.744	0	0.818	0.466	0.506	0.541	1.044	0.4	0	1.258	0	0	0	0	1.381	0	1.266	0.619	1.151	0	0.787	5.235	2.161	0.518	0.864	1.54762	0.304901	nosig	Heterogeneous nuclear ribonucleoprotein F OS=Homo sapiens OX=9606 GN=HNRNPF PE=1 SV=3	HNRNPF
P52799	1.411	1.04	0.738	0	0.438	1.193	0.781	0.632	0	0.312	0	0.731	1.091	0	2.015	0	1.876	1.045	0	1.222	1.219	1.717	0	1.15	1.07	0	0.693	0	1.092	1.279	1.23759	0.477424	nosig	Ephrin-B2 OS=Homo sapiens OX=9606 GN=EFNB2 PE=1 SV=1	EFNB2
P52888	1.24	1.205	0	0.975	0.729	2.871	0.895	1.124	1.216	1.283	1.916	1.46	1.256	0.855	3.633	1.341	0.501	0.71	1.405	0.365	0.353	0.629	2.047	0.08	1.314	0.597	0.835	1.55	0	0.79	0.937641	0.807991	nosig	Thimet oligopeptidase OS=Homo sapiens OX=9606 GN=THOP1 PE=1 SV=2	THOP1
P52907	1.007	0.687	1.183	0.666	0.563	0.952	0.661	1.262	0.577	0.97	0.019	0.58	0.056	1.213	1.042	0.769	0.66	0.408	0.377	3.291	0.859	1.482	0.743	1.567	0	1.941	3.36	1.296	0.762	1.08	1.26085	0.327581	nosig	F-actin-capping protein subunit alpha-1 OS=Homo sapiens OX=9606 GN=CAPZA1 PE=1 SV=3	CAPZA1
P53367	0.842	1.131	1.172	1.774	1.246	1.517	1.453	1.398	1.679	1.505	1.31	1.035	0.823	0.875	0.444	0.86	1	0.48	1.432	0.289	0.881	0.928	1.948	1.251	1.764	1.554	1.292	1.372	1.663	2.142	0.850878	0.160883	nosig	Arfaptin-1 OS=Homo sapiens OX=9606 GN=ARFIP1 PE=1 SV=2	ARFIP1
P53396	1.246	1.606	1.474	1.337	1.44	1.356	1.207	1.542	1.394	1.427	0.841	1.57	1.138	1.24	1.077	1.309	1.276	0.324	1.416	0.465	0.911	1.374	1.107	1.699	1.186	0.961	1.15	0.998	0.863	1.523	0.799344	0.00293687	nosig	ATP-citrate synthase OS=Homo sapiens OX=9606 GN=ACLY PE=1 SV=3	ACLY
P53634	1.384	1.493	1.157	1.351	1.369	1.162	1.427	1.35	1.249	1.213	1.666	1.299	1.365	1.52	0.738	1.584	1.294	0.551	1.61	0.394	1.16	0.891	1.158	0.942	1.298	1.218	1.042	1.458	1.1	1.28	0.895781	0.118336	nosig	Dipeptidyl peptidase 1 OS=Homo sapiens OX=9606 GN=CTSC PE=1 SV=2	CTSC
P54289	0.476	1.134	0.337	1.606	1.708	1.353	0.193	1.177	1.438	1.054	0.483	1.067	0.404	1.109	0.284	0.914	0.515	3.064	1.064	1.619	1.854	1.922	1.364	0.993	0.487	1.296	1.252	1.169	0.794	0.313	1.04844	0.824387	nosig	Voltage-dependent calcium channel subunit alpha-2/delta-1 OS=Homo sapiens OX=9606 GN=CACNA2D1 PE=1 SV=3	CACNA2D1
P54296	0.578	1.874	1.908	1.209	1.567	1.498	0.979	1.277	1.516	1.403	1.105	1.06	0.7	0.924	0.827	1.13	0.935	0	1.205	0	1.126	1.211	0.843	1.346	1.339	1.119	1.276	1.942	1.227	1.834	0.765769	0.0621241	nosig	Myomesin-2 OS=Homo sapiens OX=9606 GN=MYOM2 PE=1 SV=2	MYOM2
P54578	0.77	0.812	1.486	0.327	0.457	1.13	0.386	1.214	0.281	0.36	1.159	1.032	2.303	1.296	1.684	3.215	1.563	0.607	0.485	1.551	1.371	0.9	0.567	1.914	0.581	0.933	2.231	1.23	0.494	1.594	1.84895	0.00671749	up	Ubiquitin carboxyl-terminal hydrolase 14 OS=Homo sapiens OX=9606 GN=USP14 PE=1 SV=3	USP14
P54709	0	0	1.404	0.775	0	0	0.485	2.241	1.016	2.022	0.882	0.868	1.117	0.799	1.563	2.367	1.205	0.552	1.765	0.509	1.156	0.479	0	1.808	0.591	0.968	1.514	0.912	0.683	1.725	1.35106	0.369969	nosig	Sodium/potassium-transporting ATPase subunit beta-3 OS=Homo sapiens OX=9606 GN=ATP1B3 PE=1 SV=1	ATP1B3
P54710	0.949	1.288	0.743	1.132	1.347	1.078	1.348	1	0.897	1.021	0.65	0.909	0.687	0.822	3.412	0.906	0.871	1.752	0.8	2.055	0.744	1.05	1.011	0.898	1.208	0.516	0.65	0.87	0.805	0.681	0.985698	0.924537	nosig	Sodium/potassium-transporting ATPase subunit gamma OS=Homo sapiens OX=9606 GN=FXYD2 PE=1 SV=3	FXYD2
P54725	0.142	1.306	1.948	0.314	0.055	1.483	0.158	1.183	1.066	0.236	0.096	0.814	2.246	0.06	1.716	3.388	1.693	1.075	0.293	1.106	1.208	2.48	0.043	1.67	1.218	1.545	2.268	1.712	0.052	1.083	1.63262	0.106428	nosig	UV excision repair protein RAD23 homolog A OS=Homo sapiens OX=9606 GN=RAD23A PE=1 SV=1	RAD23A
P54727	0.343	0.93	1.258	0.717	1.278	1.376	1.324	1.616	1.749	1.114	0.548	0.542	0.498	0.926	1.966	1.653	0.966	1.212	0.829	2.176	0.855	1.081	1.257	1.021	0.567	0.673	1.138	0.998	1.251	1.064	0.906493	0.518292	nosig	UV excision repair protein RAD23 homolog B OS=Homo sapiens OX=9606 GN=RAD23B PE=1 SV=1	RAD23B
P54764	1.567	0.783	0.809	1.328	0.827	0.79	0.689	0.591	0.909	1.419	0.933	1.364	1.096	1.612	0.83	1.847	1.965	2.356	0.968	0.868	1.817	0.04	2.05	0.959	0.996	1.686	0.787	1.264	0.92	0.665	1.28825	0.104069	nosig	Ephrin type-A receptor 4 OS=Homo sapiens OX=9606 GN=EPHA4 PE=1 SV=1	EPHA4
P54802	1.275	1.307	0.859	0.783	0.771	1.133	1.2	1.242	1.014	1.618	1.169	1.168	2.078	1.059	1.188	0.782	1.327	1.076	0.998	0.756	0.953	1.32	1.225	1.25	1.57	1.23	1.105	1.59	1.288	1.024	1.0782	0.423595	nosig	Alpha-N-acetylglucosaminidase OS=Homo sapiens OX=9606 GN=NAGLU PE=1 SV=2	NAGLU
P55056	1.107	0.992	0.355	1.096	0.975	2.168	0.751	0.657	0.414	0.609	1.81	3.041	1.265	1.089	1.443	1.432	5.703	0.041	2.574	0.342	1.495	0.293	1.901	0.543	0.552	0.775	0.458	1.305	0.356	1.756	1.54395	0.144257	nosig	Apolipoprotein C-IV OS=Homo sapiens OX=9606 GN=APOC4 PE=1 SV=1	APOC4
P55058	1.017	1.258	0.961	1.194	1.38	0.966	1.083	1.334	1.006	1.378	1.341	1.112	1.272	1.104	1.118	1.12	1.479	0.853	1.401	1.255	0.87	1.591	1.032	1.015	1.044	1.123	1.043	1.083	1.239	1.035	0.998963	0.986249	nosig	Phospholipid transfer protein OS=Homo sapiens OX=9606 GN=PLTP PE=1 SV=1	PLTP
P55072	1.896	1.554	1.592	2.109	1.628	2.777	1.772	1.741	1.899	2.253	1.19	0.803	1.576	1.181	1.107	0.246	1.774	0.22	0.043	0.099	1.026	0.488	1.495	0.951	1.564	0.906	0.238	1.496	1.072	1.47	0.49282	6.08E-06	down	Transitional endoplasmic reticulum ATPase OS=Homo sapiens OX=9606 GN=VCP PE=1 SV=4	VCP
P55103	1.123	2.234	1.61	1.809	1.595	2.056	2.518	1.487	1.703	1.304	0.746	0.994	1.131	0.58	0.651	1.143	1.427	0.745	0.971	0.158	0.948	0.405	1.225	0.753	1.329	1.408	1.096	1.59	1.045	1.871	0.57962	0.000293272	down	Inhibin beta C chain OS=Homo sapiens OX=9606 GN=INHBC PE=2 SV=1	INHBC
P55145	0.818	0.954	0.827	1.735	0.943	1.077	0.853	1.708	0.783	2.082	2.188	1.191	1.596	1.657	1.023	0.232	2.282	0.501	1.448	0.845	0.616	0.779	1.737	1.212	1.634	0.291	1.223	1.735	1.745	0.279	1.02776	0.87483	nosig	Mesencephalic astrocyte-derived neurotrophic factor OS=Homo sapiens OX=9606 GN=MANF PE=1 SV=3	MANF
P55263	0.67	1.956	1.275	0	1.658	1.728	2.055	1.833	1.783	0	1.62	1.02	1.015	1.298	1.249	0.978	1.439	0	1.028	0.285	0	0	1.417	0.649	0.983	0.816	1.171	1.021	1.023	1.554	0.716391	0.202822	nosig	Adenosine kinase OS=Homo sapiens OX=9606 GN=ADK PE=1 SV=2	ADK
P55268	1.336	0.915	0.564	0.937	0.755	0.746	0.901	0.855	1.037	0.817	1.145	0.884	0.603	0.718	2.272	1.161	0.937	1.875	0.665	1.923	1.092	1.489	1.027	1.01	1.008	1.026	0.955	1.104	1.602	0.868	1.31806	0.0241113	up	Laminin subunit beta-2 OS=Homo sapiens OX=9606 GN=LAMB2 PE=1 SV=2	LAMB2
P55290	0.95	0.873	0.594	1.849	0.705	0.6	0.599	0.394	0.426	0.938	1.04	0.441	0.633	0.708	1.062	0.647	0.655	3.34	0.676	1.697	1.248	3.151	0.616	0.638	0.69	0.764	1.23	1.97	1.28	0.696	1.46203	0.115412	nosig	Cadherin-13 OS=Homo sapiens OX=9606 GN=CDH13 PE=1 SV=1	CDH13
P55774	1.334	0.898	0.783	0.73	0.415	3.305	2.203	1.986	1.166	1.199	1.3	1.973	0.715	1.027	0.173	1.208	0.405	0.477	0.679	1.133	1.596	1.154	0.842	0.711	0.387	3.406	0.856	0.661	2.246	0.82	0.776411	0.344741	nosig	C-C motif chemokine 18 OS=Homo sapiens OX=9606 GN=CCL18 PE=1 SV=1	CCL18
P55899	1.07	0.838	1.136	1.05	0.748	0.964	1.217	1.329	0.893	0.88	1.734	1.163	4.608	1.115	0.924	0.869	0.84	0.595	0.957	0.699	0.923	0.655	1.186	1.101	1.713	2.341	1.264	1.008	1.138	1.23	1.28706	0.169769	nosig	IgG receptor FcRn large subunit p51 OS=Homo sapiens OX=9606 GN=FCGRT PE=1 SV=1	FCGRT
P56199	0.936	0.706	0.673	1.496	0.637	0.678	0.718	0.954	0.83	0.616	1.106	1.217	1.108	0.6	0.668	1.347	1.024	3.7	0.514	1.527	1.206	1.982	0.715	0.678	1.068	1.177	0.984	0.829	1.414	0.847	1.43808	0.0492189	up	Integrin alpha-1 OS=Homo sapiens OX=9606 GN=ITGA1 PE=1 SV=2	ITGA1
P58166	0.929	2.503	1.343	0.35	1.336	1.849	3.008	1.917	1.258	0	0	1.324	2.089	0.97	1.881	1.312	2.22	0	0.777	0	0.686	0.405	0.946	0.333	0.536	0	1.034	0.932	0.923	0.846	0.593873	0.092609	nosig	Inhibin beta E chain OS=Homo sapiens OX=9606 GN=INHBE PE=1 SV=1	INHBE
P58546	0.684	0.765	1.402	1.022	0.431	1.054	0.955	1.288	0.533	0.574	0.193	1.125	0.74	0.837	1.269	1.164	0.417	0.536	0.646	3.2	1.221	2.764	0.83	2.332	0.183	0.342	1.707	0.811	0.934	0.97	1.2759	0.263134	nosig	Myotrophin OS=Homo sapiens OX=9606 GN=MTPN PE=1 SV=2	MTPN
P59666	1.244	0.937	1.143	0.943	0.649	1.752	0.784	1.34	0.575	1.313	0.424	2.289	1.057	0.522	0.724	1.506	0.618	0.53	1.405	1.873	1.628	0.626	0.823	1.988	0.87	0.928	2.031	0.983	0.556	2.127	1.10056	0.55502	nosig	Neutrophil defensin 3 OS=Homo sapiens OX=9606 GN=DEFA3 PE=1 SV=1	DEFA3
P59998	1.392	0.781	0.724	0.45	0.736	1.034	0.784	1.156	0.622	0.453	8.324	0.725	0.785	1.286	1.645	0.962	0.863	0.176	0.797	0.952	1.065	0.232	0.747	1.919	0.636	0.735	2.244	0.955	1.959	0.632	1.6994	0.166352	nosig	Actin-related protein 2/3 complex subunit 4 OS=Homo sapiens OX=9606 GN=ARPC4 PE=1 SV=3	ARPC4
P60022	0	0	0.432	0.196	0	0.562	0.824	0	0.903	0	0.647	0.697	0.421	0.662	3.865	1.061	0.638	0.105	0.694	3.644	0.931	0.693	0.938	0.581	0.659	0	0	0.746	0.934	0.73	3.19609	0.017659	up	Beta-defensin 1 OS=Homo sapiens OX=9606 GN=DEFB1 PE=1 SV=1	DEFB1
P60174	0.523	0.136	1.801	0.343	0	1.206	0.542	1.735	0.367	0.58	0.033	0.45	0.814	1.082	1.706	1.366	0.508	1.254	0	3.08	0.252	0.465	0	1.582	0.02	1.118	5.052	0.406	0.174	0.659	1.384	0.419654	nosig	Triosephosphate isomerase OS=Homo sapiens OX=9606 GN=TPI1 PE=1 SV=4	TPI1
P60709	1.647	0.771	1.281	1.035	0.646	1.144	0.855	1.224	0.778	0.922	0.424	0.704	0.566	0.976	1.977	0.641	0.593	1.09	0.773	2.026	0.912	1.341	1.4	1.034	0.499	0.899	3.504	1.079	0.833	1.078	1.08459	0.64109	nosig	Actin, cytoplasmic 1 OS=Homo sapiens OX=9606 GN=ACTB PE=1 SV=1	ACTB
P60900	0.846	1.485	1.118	1.733	1.346	0.938	1.334	0.888	1.534	1.07	0.602	1.325	1.016	2.251	2.874	0.878	0.9	1.34	0.998	0.679	0.836	1.164	0.832	0.78	0.908	0.82	1.033	0.747	0.891	1.396	0.905874	0.463532	nosig	Proteasome subunit alpha type-6 OS=Homo sapiens OX=9606 GN=PSMA6 PE=1 SV=1	PSMA6
P60981	2.005	1.632	0.969	1.064	0.637	1.186	1.744	0.939	0.809	0.774	0.703	0.692	0.706	0.74	0.72	0.893	0.565	0.296	0.618	4.58	1.154	0.863	0.243	0.503	1.159	0.861	1.26	0.849	0.895	0.598	0.803555	0.358623	nosig	Destrin OS=Homo sapiens OX=9606 GN=DSTN PE=1 SV=3	DSTN
P61026	0.106	0.087	0	10.592	0.009	0.016	0.007	0.008	0	0.015	0.007	0.14	0	8.963	0.288	0.33	0.003	0.215	0.019	0.178	0.009	6.292	0	0.005	0.007	0.175	0.15	0.149	0.105	0.923	0.828321	0.877008	nosig	Ras-related protein Rab-10 OS=Homo sapiens OX=9606 GN=RAB10 PE=1 SV=1	RAB10
P61158	1.452	1.193	0.85	0.937	0.501	0.833	1.204	1.035	1.004	1.117	0.503	1.201	1.284	1.259	1.288	1.07	1.504	0.204	1.178	1.894	0.51	1.13	0.888	1.322	0.832	0.744	3.861	1.014	0.796	1.319	1.17524	0.343358	nosig	Actin-related protein 3 OS=Homo sapiens OX=9606 GN=ACTR3 PE=1 SV=3	ACTR3
P61160	0.966	1.311	1.678	0.471	1.052	1.081	1.384	1.283	1.379	1.523	0.989	1.126	1.197	1.3	1.273	1.322	1.26	0.38	1.033	0.84	1.166	0.986	1.374	1.345	1.668	1.171	1.843	1.356	0.939	1.11	0.976171	0.822763	nosig	Actin-related protein 2 OS=Homo sapiens OX=9606 GN=ACTR2 PE=1 SV=1	ACTR2
P61224	2.094	1.236	2.244	2.284	0.368	0.914	0.514	0.87	0.651	0.873	0.238	0.408	0.312	2.605	1.112	0.291	0.408	0.958	1.83	2.108	0.855	1.606	0.337	1.471	0.292	0.153	1.945	1.373	1.82	0.632	0.861305	0.566935	nosig	Ras-related protein Rap-1b OS=Homo sapiens OX=9606 GN=RAP1B PE=1 SV=1	RAP1B
P61626	1.081	1.572	1.267	0.894	1.186	1.229	1.505	1.329	1.412	1.366	1.478	1.177	0.977	1.235	0.716	1.232	1.602	0.327	1.302	0.233	1.446	1.155	1.515	1.37	1.382	1.24	1.458	1.426	1.649	1.224	0.940114	0.476307	nosig	Lysozyme C OS=Homo sapiens OX=9606 GN=LYZ PE=1 SV=1	LYZ
P61769	0.756	0.973	0.914	0.897	0.715	0.609	0.88	0.835	0.938	1.051	0.428	1.663	1.124	0.919	1.071	1.386	0.975	2.015	1.495	1.186	1.664	1.613	1.324	1.112	1.572	1.152	0.925	1.214	0.912	1.298	1.46172	0.000155719	up	Beta-2-microglobulin OS=Homo sapiens OX=9606 GN=B2M PE=1 SV=1	B2M
P62258	0.734	0.573	0.735	1.077	1.015	1.031	1.053	1.306	1.346	1.449	0.35	0.596	0.563	1.287	4.348	0.552	0.364	1.512	0.636	1.903	0.776	1.313	0.969	0.687	0.331	0.67	1.911	0.909	0.864	0.819	1.03498	0.871682	nosig	14-3-3 protein epsilon OS=Homo sapiens OX=9606 GN=YWHAE PE=1 SV=1	YWHAE
P62328	0.993	0.662	1.824	1.645	0.372	0.757	0.739	0.949	1.269	1.022	0.129	1.363	0.134	0.652	0.652	0.316	0.202	1.711	0.329	4.242	0.662	2.179	0.597	1.655	0.13	0.341	1.492	0.697	1.076	0.403	0.926603	0.776095	nosig	Thymosin beta-4 OS=Homo sapiens OX=9606 GN=TMSB4X PE=1 SV=2	TMSB4X
P62805	0.805	1.347	0.464	0.689	0.109	1.621	0.32	1.136	0.26	0.846	0.856	0.178	0.107	0.066	15.436	0.191	0.111	0.141	0.051	0.589	0.023	0.259	0.076	0.073	0.039	0.91	0.413	2.317	0.075	0.598	1.48144	0.643376	nosig	Histone H4 OS=Homo sapiens OX=9606 GN=H4C1 PE=1 SV=2	H4C1
P62820	0.988	0.518	1.615	1.111	0.664	1.04	0.032	1.332	0.542	0.777	0.223	1.797	0	1.29	2.04	0.334	0.206	0.522	0.436	4.236	0.181	2.251	0.325	1.666	0.018	0.272	1.737	0.755	0.975	0.064	1.12124	0.71006	nosig	Ras-related protein Rab-1A OS=Homo sapiens OX=9606 GN=RAB1A PE=1 SV=3	RAB1A
P62937	1.264	1.112	1.304	1.323	0.854	1.263	1.182	1.444	1.042	1.109	0.646	1.535	0.44	1.163	0.898	0.978	1.062	0.46	0.838	2.075	0.981	1.713	0.96	1.484	0.187	0.936	2.199	1.258	0.811	0.996	0.908632	0.400012	nosig	Peptidyl-prolyl cis-trans isomerase A OS=Homo sapiens OX=9606 GN=PPIA PE=1 SV=2	PPIA
P62942	0.101	0	0.265	0.192	0	0.2	0.196	0.275	0	0.133	0	2.063	0	0.169	0.097	0.185	0	1.04	0	5.164	0.489	2.856	0.176	1.87	0	0.032	0.241	0.228	0.507	0	5.54956	0.0498672	up	Peptidyl-prolyl cis-trans isomerase FKBP1A OS=Homo sapiens OX=9606 GN=FKBP1A PE=1 SV=2	FKBP1A
P62993	1.686	1.462	1.527	1.153	1.201	1.792	1.216	1.511	1.395	1.034	1.595	1.23	1.171	1.202	0.841	1.341	1.457	0.595	1.244	0.449	0.991	0.567	1.376	1.289	1.459	1.321	1.301	0.974	1.106	1.342	0.81745	0.0229194	nosig	Growth factor receptor-bound protein 2 OS=Homo sapiens OX=9606 GN=GRB2 PE=1 SV=1	GRB2
P63000	1.144	0	0	2.089	0	0.807	1.612	2.636	1.035	2.878	0.503	0.078	0	0.982	0.206	0	1.751	1.536	0.926	1.4	0.639	0.44	0	0.216	1.3	0.74	1.348	0.496	0	1.354	0.57024	0.175371	nosig	Ras-related C3 botulinum toxin substrate 1 OS=Homo sapiens OX=9606 GN=RAC1 PE=1 SV=1	RAC1
P63104	0	0.381	0.927	1.21	0.073	0.874	0.054	0.831	0.435	0.384	0	0.248	0	0.875	2.568	0.28	0	1.704	0.846	3.245	0.411	1.029	0	1.002	0	0.324	3.305	0.706	0.294	0.241	1.65196	0.222653	nosig	14-3-3 protein zeta/delta OS=Homo sapiens OX=9606 GN=YWHAZ PE=1 SV=1	YWHAZ
P67936	1.39	0.481	1.375	1.13	0.269	0.37	0.458	0.9	0.482	0.606	0.145	1.588	0.287	0.434	0.656	0.189	0.105	0.453	0.191	6.137	0.207	2.673	0.89	1.308	0.729	0.155	2.119	0.386	0.598	0.244	1.30639	0.508992	nosig	Tropomyosin alpha-4 chain OS=Homo sapiens OX=9606 GN=TPM4 PE=1 SV=3	TPM4
P68036	1.716	2.109	1.731	2.171	0.243	2.222	1.933	2.16	1.287	1.677	0.335	0.372	1.97	1.946	0.397	1.582	0.343	0.865	0.453	1.241	0.182	1.103	1.459	0.374	0.645	1.256	1.599	0.436	0.352	1.581	0.536002	0.00285294	down	Ubiquitin-conjugating enzyme E2 L3 OS=Homo sapiens OX=9606 GN=UBE2L3 PE=1 SV=1	UBE2L3
P68104	0	0	0.106	0.539	5.145	0.6	0.695	0.653	0.116	0.102	2.644	0	0.248	0.223	5.039	0.071	0	0.001	0.064	0.445	0	0	0.434	0.68	0	0.961	2.766	4.163	0.11	0.19	1.13367	0.860329	nosig	Elongation factor 1-alpha 1 OS=Homo sapiens OX=9606 GN=EEF1A1 PE=1 SV=1	EEF1A1
P68133	8.574	0.486	0.904	0.37	0.416	0.632	0.514	0.785	0.529	0.604	0.211	0.465	0.363	0.516	1.542	0.346	0.33	0.108	0.344	1.47	0.548	0.716	9.486	0.728	0.191	0.594	2.135	0.537	0.512	0.643	0.788512	0.755605	nosig	Actin, alpha skeletal muscle OS=Homo sapiens OX=9606 GN=ACTA1 PE=1 SV=1	ACTA1
P68366	1.053	0.721	1.322	1.916	0.581	1.403	0.565	1.868	1.542	1.387	0.263	1.639	0.344	1.383	0.655	0.637	0.37	0.781	1.927	3.134	0.449	2.448	0.31	1.058	0.383	0.36	1.654	0.357	0.629	0.428	0.777189	0.260871	nosig	Tubulin alpha-4A chain OS=Homo sapiens OX=9606 GN=TUBA4A PE=1 SV=1	TUBA4A
P68871	0.047	0.042	0.066	0.043	0.029	0.109	0.065	0.048	0.038	0.061	0.038	4.443	0.123	0.057	3.224	0.428	0.165	2.832	0.043	2.39	0.178	5.333	0.148	6.651	0.047	0.111	0.109	0.484	0.044	0.188	24.6679	0.0110233	up	Hemoglobin subunit beta OS=Homo sapiens OX=9606 GN=HBB PE=1 SV=2	HBB
P69892	1.168	0.179	0.615	0.624	0.387	1.384	0.635	0.71	1.002	0.842	0.68	0.801	0.618	0.323	1.695	0.529	0.276	3.128	0.942	2.437	0.161	5.474	0.359	1.232	0.511	0.532	0.839	0.459	0.301	0.311	1.43175	0.301912	nosig	Hemoglobin subunit gamma-2 OS=Homo sapiens OX=9606 GN=HBG2 PE=1 SV=2	HBG2
P69905	0.071	0.072	0.105	0.072	0.077	0.156	0.074	0.084	0.073	0.092	0.063	4.464	0.167	0.072	2.948	0.426	0.163	2.048	0.07	1.769	0.194	6.884	0.159	7.16	0.057	0.136	0.128	0.449	0.069	0.213	15.7757	0.0190832	up	Hemoglobin subunit alpha OS=Homo sapiens OX=9606 GN=HBA1 PE=1 SV=2	HBA1
P78324	0.063	0.79	0.85	1.363	0.801	0.389	1.044	0.13	1.243	0.739	0.661	0.556	1.284	0.111	1.954	1.406	0.907	3.183	1.61	2.554	1.197	1.267	0.75	0.526	0.353	1.34	0.905	0.438	0.561	1.644	1.5655	0.0671485	nosig	Tyrosine-protein phosphatase non-receptor type substrate 1 OS=Homo sapiens OX=9606 GN=SIRPA PE=1 SV=2	SIRPA
P78385	0.035	0	0.023	0	0	0.023	0.021	0	0.031	0.046	11.125	0.049	0.043	0.027	8.78	0	0.031	0.067	0.037	0.012	0.027	0.022	0	0	0	0.032	0.038	0	0	0	56.676	0.164239	nosig	Keratin, type II cuticular Hb3 OS=Homo sapiens OX=9606 GN=KRT83 PE=1 SV=2	KRT83
P78386	0.115	0.082	0.138	0.023	0.08	0.122	0.082	0.072	0.131	0.042	13.642	0.099	0.138	0.096	13.845	0.124	0.086	0.036	0.147	0.032	0.104	0.03	0.067	0.028	0	0.07	0.099	0	0.074	0.085	16.2356	0.167228	nosig	Keratin, type II cuticular Hb5 OS=Homo sapiens OX=9606 GN=KRT85 PE=1 SV=1	KRT85
P78417	0.689	0.677	0.889	0.642	0.606	1.062	0.658	0.966	0.305	0.629	0.87	0.541	0.836	4.444	4.34	1.3	0.991	1.22	0.783	1.191	1.171	0.618	0.952	1.054	0.803	0.82	1.65	0.848	0.429	0.885	1.80724	0.0342558	up	Glutathione S-transferase omega-1 OS=Homo sapiens OX=9606 GN=GSTO1 PE=1 SV=2	GSTO1
P78527	0.611	2.553	2.04	1.674	1.697	1.379	1.627	1.382	2.777	1.91	0.708	1.496	1.452	0.924	1.299	1.425	0.754	0.701	0.91	0.074	0.733	0.292	1.067	0.591	1.801	0.977	0	1.172	0.982	1.431	0.532266	0.00212981	down	DNA-dependent protein kinase catalytic subunit OS=Homo sapiens OX=9606 GN=PRKDC PE=1 SV=3	PRKDC
P80108	1.567	1.304	1.72	1.157	1.409	1.489	1.905	1.902	0.716	1.416	1.429	1.163	1.072	1.463	0.739	0.958	1.127	0.277	1.068	0.06	0.811	0.963	1.073	1.111	1.945	1.393	1.038	1.986	1.713	1.46	0.783305	0.0532927	nosig	Phosphatidylinositol-glycan-specific phospholipase D OS=Homo sapiens OX=9606 GN=GPLD1 PE=1 SV=3	GPLD1
P80188	0.262	0.161	0.12	1.014	0.095	0.218	0.313	0.23	4.483	0.098	0.254	1.566	0.535	0.198	4.674	0.873	0.271	1.211	0.364	1.589	0.717	1.478	5.032	1.802	2.256	0.63	0.217	0.359	0.479	0.812	1.80991	0.29603	nosig	Neutrophil gelatinase-associated lipocalin OS=Homo sapiens OX=9606 GN=LCN2 PE=1 SV=2	LCN2
P80404	1.356	1.103	1.292	0.919	1.022	0.756	1.105	0.879	0	1.076	1.028	0.947	0.931	1.337	1.764	1.179	0.995	2.046	1.022	1.332	0.897	1.153	0	0.941	0.913	1.027	0.915	0.84	0.85	1.246	1.12342	0.441992	nosig	4-aminobutyrate aminotransferase, mitochondrial OS=Homo sapiens OX=9606 GN=ABAT PE=1 SV=3	ABAT
P80511	1.104	1.439	0.778	1.079	0.481	1.581	0.642	2.032	0.494	1.16	0.481	0.415	0.494	0.973	0.815	0.512	0.511	2.22	0.684	2.79	1.243	0.495	0.418	1.411	0.42	1.185	2.071	1.009	0.49	2.277	0.969138	0.885698	nosig	Protein S100-A12 OS=Homo sapiens OX=9606 GN=S100A12 PE=1 SV=2	S100A12
P80748	1.091	1.342	1.988	1.175	2.315	1.145	1.405	1.521	1.575	1.302	1.356	1.186	1.285	1.501	0.641	1.265	1.441	0.691	1.104	0.748	0.888	0.663	1.409	1.016	0.998	0.919	1.068	1.052	1.026	1.365	0.727573	0.0111279	down	Immunoglobulin lambda variable 3-21 OS=Homo sapiens OX=9606 GN=IGLV3-21 PE=1 SV=2	IGLV3-21
P81605	1.005	1.607	0.646	1.069	1.541	1.078	1.402	0.706	1.089	1.147	0.586	0.701	0.429	0.987	1.771	0.76	1.377	2.07	1.409	1.425	0.783	1.281	1.246	1.103	1.012	1.419	0.49	1.26	1.259	0.758	0.979894	0.871391	nosig	Dermcidin OS=Homo sapiens OX=9606 GN=DCD PE=1 SV=2	DCD
P84243	0.753	1.176	0.376	0.652	0.243	1.162	0.227	0.943	0.172	0.667	0.528	0.198	0.197	0.138	15.733	0.367	0.247	0.25	0.094	0.73	0.042	0.323	0.081	0.234	0.053	0.715	0.817	1.542	0.043	0.859	1.82004	0.511131	nosig	Histone H3.3 OS=Homo sapiens OX=9606 GN=H3-3A PE=1 SV=2	H3-3A
P98066	0.891	0.76	0.66	0.659	0.985	0.981	0.827	0.838	0.602	2.197	0.689	0.969	1.294	0.056	0	2.051	1.926	0.941	1.253	1.381	2.334	1.035	0.595	1.889	1.19	1.908	1.093	1.531	0.109	1.959	1.28739	0.213703	nosig	Tumor necrosis factor-inducible gene 6 protein OS=Homo sapiens OX=9606 GN=TNFAIP6 PE=1 SV=2	TNFAIP6
P98095	0.915	2.021	1.172	0	2.097	0	1.686	1.033	1.663	1.899	1.192	0.683	1.439	0.952	2.946	0.608	1.432	0.825	0.936	1.125	0.242	0.765	0.712	1.075	0.542	0.571	1.072	0.482	1.776	0.403	0.792007	0.367106	nosig	Fibulin-2 OS=Homo sapiens OX=9606 GN=FBLN2 PE=1 SV=2	FBLN2
P98155	1.531	1.965	0.616	0.718	0.998	2.034	1.041	1.603	1.558	0.442	1.462	1.736	1.416	1.579	1.153	0.845	2.297	0.404	1.447	0.07	0.96	0	2.049	1.064	1.374	1.18	1.763	0.97	0.989	1.12	0.954662	0.800796	nosig	Very low-density lipoprotein receptor OS=Homo sapiens OX=9606 GN=VLDLR PE=1 SV=1	VLDLR
P98160	0.826	0.768	0.773	0.909	0.91	1.074	1.01	0.896	0.753	0.659	1.218	0.981	0.896	0.934	1.679	0.884	1.098	1.969	0.879	1.869	1.354	1.22	1.405	1.118	1.237	1.063	0.994	0.935	1.42	0.917	1.40301	0.000295342	up	Basement membrane-specific heparan sulfate proteoglycan core protein OS=Homo sapiens OX=9606 GN=HSPG2 PE=1 SV=4	HSPG2
Q00796	0.005	0.019	0.012	0.015	0.015	0.016	0.013	0.018	0.009	0.019	0.016	2.894	0.015	25.724	2.89	0.223	0.022	0.574	0.882	0.019	0.011	0.027	0.009	0.022	0.01	0.013	0.599	0.018	0.009	0.017	120.546	0.203405	nosig	Sorbitol dehydrogenase OS=Homo sapiens OX=9606 GN=SORD PE=1 SV=4	SORD
Q01105	1.55	1.393	1.54	1.535	1.568	1.518	1.478	1.29	1.561	1.704	1.238	1.279	1.464	0.951	0.68	1.034	1.776	0.471	1.163	0.243	0.927	0.502	1.26	1.688	1.647	1.041	1.449	1.219	1.22	0.976	0.734227	0.000417703	down	Protein SET OS=Homo sapiens OX=9606 GN=SET PE=1 SV=3	SET
Q01433	0.924	1.942	1.746	1.345	1.448	1.56	1.301	1.521	1.169	1.754	1.686	1.369	1.924	1.672	0.525	1.394	1.723	0.189	1.058	0.343	0.56	0.538	2.066	0.597	1.506	1.007	0.873	1.383	1.223	1.357	0.781543	0.0488568	nosig	AMP deaminase 2 OS=Homo sapiens OX=9606 GN=AMPD2 PE=1 SV=2	AMPD2
Q01459	0.914	1.442	0.948	1.398	0.945	0.857	1.166	1.081	0.508	1.529	1.663	1.362	1.032	1.496	1.064	1.192	1.527	1.149	1.014	0.795	1.523	0.997	0.28	1.527	1.405	1.791	1.235	1.183	1.101	1.031	1.12936	0.277369	nosig	Di-N-acetylchitobiase OS=Homo sapiens OX=9606 GN=CTBS PE=1 SV=1	CTBS
Q01469	0	0.268	0.232	0.21	0.125	0.187	0.718	0.313	0.782	0.187	0.052	0.23	0.065	0.235	0.236	0.021	0.143	0.328	0.285	0.388	0.12	0.436	0.115	0.279	0.116	25.918	0.253	0.46	0.014	0	4.91297	0.370279	nosig	Fatty acid-binding protein 5 OS=Homo sapiens OX=9606 GN=FABP5 PE=1 SV=3	FABP5
Q01518	1.203	1.228	0.862	1.469	0.884	0.879	0.844	1.144	1.088	1.199	0.935	0.955	0.613	1.019	0.994	0.772	0.902	0.538	0.856	2.266	0.895	1.549	0.278	0.967	1.103	0.887	3.458	1.413	0.855	0.977	1.02926	0.851047	nosig	Adenylyl cyclase-associated protein 1 OS=Homo sapiens OX=9606 GN=CAP1 PE=1 SV=5	CAP1
Q01970	0.845	0.361	0	2.112	1.243	0	1.125	0	0	1.116	1.444	0.746	0.653	1.075	1.095	0	1.212	0	1.125	0	1.12	1.023	0.73	0	0	2.609	0.545	3.376	0.59	0	1.27485	0.54312	nosig	1-phosphatidylinositol 4,5-bisphosphate phosphodiesterase beta-3 OS=Homo sapiens OX=9606 GN=PLCB3 PE=1 SV=2	PLCB3
Q02413	2.988	1.325	0.89	1.661	0.984	1.069	1.501	1.206	1.133	1.428	0.741	0.902	1.059	0.941	0.61	1.253	0.824	1.143	1.527	0.672	0.8	0.716	0.765	0.721	0.969	4.425	1.059	0.876	0.782	0.911	0.764751	0.217761	nosig	Desmoglein-1 OS=Homo sapiens OX=9606 GN=DSG1 PE=1 SV=2	DSG1
Q02763	0	0.845	1.088	0	0.836	1.395	0.728	0	0	1.366	0	0.608	0	0	0	0.658	1.255	1.233	0	1.71	1.16	0.795	1.392	0.734	0	1.203	0	1.066	0	0	0.943912	0.878957	nosig	Angiopoietin-1 receptor OS=Homo sapiens OX=9606 GN=TEK PE=1 SV=2	TEK
Q02809	1.416	0.403	0.238	1.542	0.357	0.218	0.189	0.242	2.939	0	0.303	1.07	1.383	1.674	3.499	0.462	0.364	1.614	0.483	2.167	1.49	1.178	0.335	0.267	1.287	0.804	0.269	1.211	1.718	1.061	1.50046	0.289848	nosig	Procollagen-lysine,2-oxoglutarate 5-dioxygenase 1 OS=Homo sapiens OX=9606 GN=PLOD1 PE=1 SV=2	PLOD1
Q02818	1.648	2.2	2.032	0.8	1.204	1.463	1.789	1.674	2.374	0.835	1.332	0.676	0.816	1.518	1.095	0.481	1.17	0.525	1.87	0.404	0.434	0.679	2.381	0.561	2.082	0.81	0.471	1.805	1.496	0.551	0.660372	0.0214241	down	Nucleobindin-1 OS=Homo sapiens OX=9606 GN=NUCB1 PE=1 SV=4	NUCB1
Q02985	1.134	0.766	1.077	0.964	0.888	2.113	1.38	0.844	1.644	2.63	1.745	1.078	1.657	0.344	0.52	2.175	2.056	0.296	1.764	0.126	1.002	0.32	0.998	1.657	1.586	1.606	1.984	1.028	0.86	1.502	0.904167	0.600449	nosig	Complement factor H-related protein 3 OS=Homo sapiens OX=9606 GN=CFHR3 PE=1 SV=2	CFHR3
Q03591	1.768	0.925	1.816	1.745	1.515	1.733	1.932	1.466	2.078	2.158	1.486	0.888	0.692	0.992	0.81	1.318	1.318	0.548	1.627	0.242	1.177	0.523	0.733	0.828	1.329	1.274	1.169	1.261	1.089	0.926	0.590278	6.67E-05	down	Complement factor H-related protein 1 OS=Homo sapiens OX=9606 GN=CFHR1 PE=1 SV=2	CFHR1
Q04695	1.258	1.361	1.358	1.928	1.212	1.153	1.656	1.529	1.339	1.41	1.192	1.146	1.739	0.918	0.571	0.917	1.111	1	1.054	0.556	0.767	1.006	1.395	1.011	1.227	1.761	0.937	1.34	1.323	1.109	0.777246	0.00467892	nosig	Keratin, type I cytoskeletal 17 OS=Homo sapiens OX=9606 GN=KRT17 PE=1 SV=2	KRT17
Q04721	0.169	1.129	0.443	0.953	0.384	0.594	0.844	0.88	1.161	0.254	1.515	0.67	1.051	1.161	0.78	1.819	1.01	4.547	0.864	1.086	1.214	1.4	0.945	0.86	1.017	1.086	1.207	0.659	0.964	1.503	1.86155	0.0115254	up	Neurogenic locus notch homolog protein 2 OS=Homo sapiens OX=9606 GN=NOTCH2 PE=1 SV=3	NOTCH2
Q04756	0.434	0.373	0.465	2.023	0.229	0.517	0.239	0.258	0.55	0	4.11	0.86	0.326	0.34	2.471	2.797	0	0.53	0.28	0.581	0.565	2.549	0.75	3.552	0	0.197	0	2.418	0.354	0	2.22877	0.0787358	nosig	Hepatocyte growth factor activator OS=Homo sapiens OX=9606 GN=HGFAC PE=1 SV=1	HGFAC
Q04760	0.508	0.285	0.556	0.489	0.668	0.622	0.594	1.043	0.216	0.371	0.282	0.387	1.728	1.373	4.783	2.216	1.635	0.587	0.252	1.329	1.384	1.241	0.926	0.678	1.115	0.941	2.659	1.304	1.475	0.95	2.54531	0.00203199	up	Lactoylglutathione lyase OS=Homo sapiens OX=9606 GN=GLO1 PE=1 SV=4	GLO1
Q05315	0.537	0.992	1.247	4.577	0.649	5.37	1.746	1.371	0.916	2.189	0.277	1.025	0.378	0.495	0	0.732	0.836	0.478	1.004	0.199	0.958	1.215	0.216	3.875	0.746	0.701	1.167	0.577	0.865	0.735	0.420511	0.0665598	nosig	Galectin-10 OS=Homo sapiens OX=9606 GN=CLC PE=1 SV=3	CLC
Q05707	1.54	0	0.494	1.228	0.238	0.199	0.184	2.018	0.189	0.557	0.218	0.232	0.749	0.208	5.198	0.18	0.192	3.64	0.647	1.23	0.325	0	0.719	0.816	0.668	1.149	0.675	1.983	2.275	0.64	1.63563	0.255499	nosig	Collagen alpha-1(XIV) chain OS=Homo sapiens OX=9606 GN=COL14A1 PE=1 SV=3	COL14A1
Q06033	0.964	1.011	1.522	1.017	1.602	0.845	0.786	1.54	1.039	2.052	0.927	1.105	1.66	0.898	1.048	1.579	1.57	0.733	2.418	0.697	1.536	1.014	0.939	1.018	1.003	1.092	1.113	0.859	0.917	1.419	0.951083	0.709018	nosig	Inter-alpha-trypsin inhibitor heavy chain H3 OS=Homo sapiens OX=9606 GN=ITIH3 PE=1 SV=2	ITIH3
Q06141	0	0	0.407	0.744	0	0.29	0.488	0.632	0	0.553	0.355	0.628	0.482	0.431	1.527	0.363	0.379	5.008	0.591	3.25	0.615	0	0.527	0.263	0	0.338	0.496	1.278	0.591	0.816	2.88022	0.0500005	nosig	Regenerating islet-derived protein 3-alpha OS=Homo sapiens OX=9606 GN=REG3A PE=1 SV=1	REG3A
Q06481	0.979	0.986	1.194	1.99	1.78	1.531	1.347	2.622	3.258	1.86	0.351	0.57	0.274	1.81	0.25	0.702	0.844	1.454	2.057	0.701	0.502	2.102	0.754	0.571	0.427	0.673	0.074	0.55	2.43	1.033	0.516584	0.00706452	down	Amyloid-like protein 2 OS=Homo sapiens OX=9606 GN=APLP2 PE=1 SV=2	APLP2
Q06830	0.399	0.444	0.909	0.265	1.665	0.614	0.491	0.441	0.368	0.473	0.129	1.014	1.869	1.808	2.391	2.641	0.81	1.318	0.434	1.203	1.325	1.598	0.257	1.864	0.14	3.113	2.471	0.866	0.317	1.309	2.21429	0.00403876	up	Peroxiredoxin-1 OS=Homo sapiens OX=9606 GN=PRDX1 PE=1 SV=1	PRDX1
Q07075	0.861	0.662	0.667	0.989	0.842	0.668	0.736	0.756	0.694	0.786	0.941	1.159	0.811	1.738	0.769	1.248	1.341	1.972	1.028	2.263	0.877	1.872	1.283	0.978	1.015	0.841	0.912	0.769	1.84	0.752	1.59307	0.000394508	up	Glutamyl aminopeptidase OS=Homo sapiens OX=9606 GN=ENPEP PE=1 SV=3	ENPEP
Q07507	1.298	0	0.351	0	0.751	1.209	1.481	1.594	0.905	0	0.927	1.847	1.206	0.93	1.085	1.561	1.818	1.593	0.907	0.451	0.765	0	0.936	0	0.822	1.364	1.519	1.066	0	1.939	1.36619	0.264911	nosig	Dermatopontin OS=Homo sapiens OX=9606 GN=DPT PE=1 SV=2	DPT
Q07954	0.771	0.65	0.64	1	0.763	0.667	0.613	0.824	0.734	0.885	0.986	1.05	0.978	0.852	1.411	1.081	1.199	2.247	1.264	1.889	0.932	2.091	0.977	0.89	1.045	0.805	0.925	1.237	1.524	1.124	1.62363	8.33E-05	up	Prolow-density lipoprotein receptor-related protein 1 OS=Homo sapiens OX=9606 GN=LRP1 PE=1 SV=2	LRP1
Q08174	0.703	1.207	1.256	0.573	0.806	0.831	0.983	1.077	1.125	0	1.024	0.834	0.641	1.016	3.073	0.96	0.503	0.144	0.901	3.556	0.822	0	0.99	0.898	0.714	0.984	0.726	1.051	0.821	0.631	1.18497	0.480868	nosig	Protocadherin-1 OS=Homo sapiens OX=9606 GN=PCDH1 PE=1 SV=2	PCDH1
Q08188	0.26	0.323	0.792	0.499	1.189	0.61	1.16	0.78	1.105	0.251	0.579	0.259	0.196	0.196	3.182	0.3	1.079	2.661	0.781	0.403	0.942	1.226	0.294	1.749	0.304	8.402	1.364	1.349	0.16	0.566	1.86483	0.178191	nosig	Protein-glutamine gamma-glutamyltransferase E OS=Homo sapiens OX=9606 GN=TGM3 PE=1 SV=4	TGM3
Q08209	1.253	2.491	0.582	1.347	0.605	2.421	2.115	1.55	0.184	0.877	0.628	0.644	2.105	2.107	1.156	0.519	0.967	1.138	1.287	1.23	0.416	1.141	0.985	0.633	2.011	0.658	1.552	1.05	0.926	0.397	0.802607	0.3616	nosig	Serine/threonine-protein phosphatase 2B catalytic subunit alpha isoform OS=Homo sapiens OX=9606 GN=PPP3CA PE=1 SV=1	PPP3CA
Q08257	1.191	1.658	1.76	1.22	1.907	1.508	1.757	1.857	1.764	1.089	1.32	1.341	1.196	2.292	0.612	1.21	1.628	0.133	1.465	0.264	0.725	0.054	1.468	0.819	1.668	1.196	1.043	1.287	1.083	1.398	0.706575	0.00614323	down	Quinone oxidoreductase OS=Homo sapiens OX=9606 GN=CRYZ PE=1 SV=1	CRYZ
Q08380	0.846	1.204	1.027	0.977	0.755	1.154	1.147	1.052	1.033	1.429	1.192	1.829	1.179	1.108	1.046	1.355	1.084	1.568	1.291	0.942	0.859	1.22	1.161	0.809	1.149	1.551	0.806	1.821	1.169	0.922	1.13239	0.128233	nosig	Galectin-3-binding protein OS=Homo sapiens OX=9606 GN=LGALS3BP PE=1 SV=1	LGALS3BP
Q08431	0	0.963	1.599	0.443	0.893	0	0	0	0	0.204	0	1.639	0	1.008	1.795	0	0	0.122	0.35	0.799	0	1.399	0	0	1.003	0	1.14	0	2.813	0	1.47099	0.454541	nosig	Lactadherin OS=Homo sapiens OX=9606 GN=MFGE8 PE=1 SV=3	MFGE8
Q08495	0.94	0	0	0.588	0	0.634	0	0.344	1.706	0.6	0	1.541	0.936	0.386	1.363	1.656	0.645	1.659	0	2.426	0.974	1.661	0.363	1.378	0.546	0.616	0.453	1.054	0.803	0.78	1.99917	0.043354	up	Dematin OS=Homo sapiens OX=9606 GN=DMTN PE=1 SV=3	DMTN
Q08554	0	0.559	0.946	1.193	1.385	0.353	1.112	1.278	0.815	1.637	0.416	0.652	0.318	0.357	1.786	0.711	1.149	1.064	0.866	1.598	0.688	2.925	0.862	0.124	1.09	4.531	0.227	1.275	1.08	0.627	1.20425	0.50327	nosig	Desmocollin-1 OS=Homo sapiens OX=9606 GN=DSC1 PE=1 SV=2	DSC1
Q08830	0.515	0	0	0.616	0.708	0.363	0.63	0	0.876	0.827	0.929	2.327	0.266	0.402	3.208	1.472	0.592	1.316	0.801	1.339	0.581	1.205	1.143	0.801	0.775	2.708	2.421	0	0.417	0.412	2.54851	0.0041863	up	Fibrinogen-like protein 1 OS=Homo sapiens OX=9606 GN=FGL1 PE=1 SV=3	FGL1
Q09328	0.737	1.163	0.851	0.552	1.137	0	0.779	1.009	1.035	0.963	0.912	0.577	0.906	0.88	0.6	0.95	1.076	1.015	1.137	2.108	0.648	3.458	0.606	0.677	0.864	0	2.176	1.119	0.755	0	1.24386	0.337449	nosig	Alpha-1,6-mannosylglycoprotein 6-beta-N-acetylglucosaminyltransferase A OS=Homo sapiens OX=9606 GN=MGAT5 PE=1 SV=1	MGAT5
Q09666	0.672	0.437	0.507	1.225	1.109	0.415	0.748	0.492	0.604	0.553	0.641	0.496	0.511	0.77	4.499	1.247	0.572	1.752	0.72	1.855	0.787	1.135	0.42	0.993	0.718	1.881	3.191	0.856	0.666	0.578	1.79592	0.038498	up	Neuroblast differentiation-associated protein AHNAK OS=Homo sapiens OX=9606 GN=AHNAK PE=1 SV=2	AHNAK
Q10471	1.386	1.581	1.291	1.188	1.499	1.356	1.175	1.378	1.116	1.289	0.733	1.062	1.104	1.152	1.287	1.043	1.487	1.028	1.424	0.589	1.015	0.979	1.438	1.15	0.65	0.966	1.612	1.198	1.288	1.339	0.85014	0.0146115	nosig	Polypeptide N-acetylgalactosaminyltransferase 2 OS=Homo sapiens OX=9606 GN=GALNT2 PE=1 SV=1	GALNT2
Q10567	0.642	0	0.852	0.829	0.974	0	0	0	0	0.604	0	0.457	0	0.796	0.723	0	0.625	0.527	1.058	3.444	0	0	0	0.404	0.528	0	1.152	0.822	0	1.109	1.49257	0.394258	nosig	AP-1 complex subunit beta-1 OS=Homo sapiens OX=9606 GN=AP1B1 PE=1 SV=2	AP1B1
Q10588	0.797	0.67	0.612	0.906	1.065	0.656	0.538	0.702	0.292	0.448	1.261	1.209	1.494	1.589	0.636	1.604	0.959	2.132	1.382	2.375	1.281	1.386	1.114	1.067	1.097	0.866	1.228	0.8	0.971	0.805	1.88872	2.94E-05	up	ADP-ribosyl cyclase/cyclic ADP-ribose hydrolase 2 OS=Homo sapiens OX=9606 GN=BST1 PE=1 SV=2	BST1
Q11201	1.004	0.914	1.575	0	1.312	1.089	1.201	1.46	1.11	0.837	1.749	1.408	0.961	1.063	1.256	1.092	1.512	0	1.516	0	1.107	1.106	1.023	1.564	1.028	1.574	1.052	0.996	1.596	1.341	1.09236	0.579699	nosig	CMP-N-acetylneuraminate-beta-galactosamide-alpha-2,3-sialyltransferase 1 OS=Homo sapiens OX=9606 GN=ST3GAL1 PE=2 SV=1	ST3GAL1
Q12805	0.649	0.871	0.687	0.755	0.815	0.655	0.648	0.733	0.76	0.901	0.925	1.017	0.989	0.667	1.57	1.646	1.021	2.03	1.257	2.792	1.118	1.464	1.069	0.79	0.964	0.773	0.883	0.933	1.208	0.532	1.58202	0.00155176	up	EGF-containing fibulin-like extracellular matrix protein 1 OS=Homo sapiens OX=9606 GN=EFEMP1 PE=1 SV=2	EFEMP1
Q12840	1.593	0.636	0.948	1.414	1.44	1.338	1.306	0.682	0.629	0.561	1.297	1.384	1.655	1.285	1.289	1.169	0.704	2.394	1.003	0.822	1.654	1.075	0.629	1.742	1.323	1.012	0.632	1.029	0.636	0.87	1.11899	0.447189	nosig	Kinesin heavy chain isoform 5A OS=Homo sapiens OX=9606 GN=KIF5A PE=1 SV=2	KIF5A
Q12841	0.525	0.613	0.402	1.197	0.707	0.566	0.631	0.858	0.779	0.511	1.069	0.561	0.896	0.912	3.842	1.034	0.783	1.74	1.038	2.993	1.16	1.676	0.457	0.872	0.656	0.673	0.524	0.831	0.549	0.792	1.69819	0.0292509	up	Follistatin-related protein 1 OS=Homo sapiens OX=9606 GN=FSTL1 PE=1 SV=1	FSTL1
Q12860	1.116	0.985	0.6	1.252	0.983	1.046	0.924	1.017	0.914	1.048	1.013	0.869	1.023	1.052	0.595	0.956	0.972	3.405	0.971	1.323	1.168	1.619	1.024	0.949	0.995	1.238	0.972	0.794	0.924	1.077	1.16029	0.262143	nosig	Contactin-1 OS=Homo sapiens OX=9606 GN=CNTN1 PE=1 SV=1	CNTN1
Q12864	0.229	0.08	0.033	0.137	0.123	0.128	0.178	0.101	0.079	0.332	0.282	0.091	0.519	0.092	0.682	0.467	0.041	1.4	0.415	9.059	0.307	3.119	0.223	0	0.288	0.11	0.274	1.149	0.256	0.218	6.68732	0.0923946	nosig	Cadherin-17 OS=Homo sapiens OX=9606 GN=CDH17 PE=1 SV=3	CDH17
Q12906	0	0	0.256	0	0.458	0.157	0.131	2.638	0.121	1.167	0.376	0.472	0.143	3.034	10.324	0	0.178	0.41	0.848	0.285	0.343	0.753	0	0.245	0.105	0.054	1.774	0.676	0.402	0.286	2.10106	0.355738	nosig	Interleukin enhancer-binding factor 3 OS=Homo sapiens OX=9606 GN=ILF3 PE=1 SV=3	ILF3
Q12907	0.648	0.671	0.756	0.809	0.468	0.766	0.841	0.599	0.866	0.708	0.882	1.149	0.9	0.762	2.251	1.174	1.253	1.604	1.274	1.934	1.944	0.813	0.706	1.569	1.161	1.444	0.884	1.317	1.213	1.063	1.77349	1.41E-05	up	Vesicular integral-membrane protein VIP36 OS=Homo sapiens OX=9606 GN=LMAN2 PE=1 SV=1	LMAN2
Q13093	1.538	1.731	0.401	0.66	0.616	0.363	1.38	0.36	0.699	0.955	0.955	2.059	1.2	0.832	1.448	1.124	1.414	1.292	0.953	1.084	0.749	1.381	1.953	1.447	0.97	1.479	0.628	0.879	1.945	1.925	1.47748	0.0416962	up	Platelet-activating factor acetylhydrolase OS=Homo sapiens OX=9606 GN=PLA2G7 PE=1 SV=1	PLA2G7
Q13103	0.742	1.646	1.101	1.76	2.465	1.207	1.572	0.833	2.07	1.333	1.395	1.472	0.982	1.194	0.199	1.94	2.185	0.127	1.855	0.043	0.863	0.443	2.331	1.027	1.558	1.352	1.671	0.441	1.341	1.104	0.798527	0.205803	nosig	Secreted phosphoprotein 24 OS=Homo sapiens OX=9606 GN=SPP2 PE=1 SV=1	SPP2
Q13201	0.753	0.955	0.913	1.581	0.627	1.299	0.569	1.029	1.326	1.084	0.669	0.65	0.518	1.449	0.673	0.741	0.781	1.738	2.598	2.385	0.927	0.989	0.617	1.31	0.671	1.035	0.18	0.978	1.909	1.599	1.10581	0.547261	nosig	Multimerin-1 OS=Homo sapiens OX=9606 GN=MMRN1 PE=1 SV=3	MMRN1
Q13217	1.224	1.029	0.868	1.101	0.777	0.782	1.183	1.035	0.692	0.998	0.92	1	1.082	0.637	0.87	1.296	1.039	1.984	1.579	1.606	1.31	1.097	0.861	1.38	1.514	1.441	1.061	0.811	1.02	1.241	1.22557	0.0263171	nosig	DnaJ homolog subfamily C member 3 OS=Homo sapiens OX=9606 GN=DNAJC3 PE=1 SV=1	DNAJC3
Q13228	0.57	0.334	0.524	0.375	0.284	0.711	0.484	0.569	0.474	0.479	0.548	0.936	1.398	2.209	4.801	2.178	0.694	1.173	0.511	1.277	1.278	2.151	0.64	1.833	0.546	0.797	0.817	1.719	0.574	0.851	2.80298	0.0010554	up	Methanethiol oxidase OS=Homo sapiens OX=9606 GN=SELENBP1 PE=1 SV=2	SELENBP1
Q13232	0.039	1.554	0.92	2.661	0.079	0.047	1.303	1.483	1.73	1.804	0.054	1.448	0.067	0.056	0.037	0.062	0.067	1.579	3.909	1.594	1.108	2.617	0.071	1.864	1.385	1.741	0.054	0.066	2.508	1.428	0.93438	0.8404	nosig	Nucleoside diphosphate kinase 3 OS=Homo sapiens OX=9606 GN=NME3 PE=1 SV=2	NME3
Q13308	0.519	1.023	1.587	1.369	1.028	0.722	1.686	0.695	1.334	1.087	0.472	0.538	0.588	1.658	1.001	1.439	0.607	2.116	1.26	1.196	1.819	0.804	0.901	0.925	1.184	4.397	0.38	0.307	0.546	0.788	1.03738	0.863533	nosig	Inactive tyrosine-protein kinase 7 OS=Homo sapiens OX=9606 GN=PTK7 PE=1 SV=2	PTK7
Q13332	1.199	0.993	1.082	1.274	1.508	1.121	0.986	0.946	0.81	0.924	0.842	0.873	0.921	1.039	0.806	1.223	1.394	1.86	1.123	0.798	1.525	2.003	0.739	1.058	1.152	1.433	1.259	1.234	1.127	1.153	1.08651	0.352306	nosig	Receptor-type tyrosine-protein phosphatase S OS=Homo sapiens OX=9606 GN=PTPRS PE=1 SV=3	PTPRS
Q13449	0.553	0.563	0	2.208	0.474	0	0	0.415	0	0.695	0	0.435	0	0.347	0.553	0.56	0.369	4.089	1.265	1.603	0.261	2.058	0.467	0.732	2.059	1.055	0.77	1.099	0.518	0.478	1.90689	0.148881	nosig	Limbic system-associated membrane protein OS=Homo sapiens OX=9606 GN=LSAMP PE=1 SV=2	LSAMP
Q13508	1.023	0.674	0.865	0.557	0.856	0.8	1.113	1.281	0.912	0.835	1.646	0.448	1.022	0.597	1.72	0.996	1.42	1.331	0.803	1.336	1.874	1.852	1.176	1.251	1.141	1.294	0.868	1.458	1.627	0.855	1.38599	0.00449837	up	Ecto-ADP-ribosyltransferase 3 OS=Homo sapiens OX=9606 GN=ART3 PE=1 SV=2	ART3
Q13683	1.713	0	1.269	1.121	0.869	0	1.74	1.323	2.257	1.646	1.4	1.253	0	0.86	0.493	0	0	0.448	0	0.476	0.64	0	1.633	0	0.901	1.356	1.892	0	0	0	0.475457	0.0359903	down	Integrin alpha-7 OS=Homo sapiens OX=9606 GN=ITGA7 PE=1 SV=3	ITGA7
Q13740	0.866	0.677	0.721	1.059	0.974	0.715	0.525	0.901	0.914	0.722	0.904	0.987	0.867	1.11	1.251	0.752	1.213	2.302	1.335	3.037	0.963	1.185	0.838	1.116	0.697	0.927	0.852	0.823	1.032	0.528	1.40692	0.0254789	up	CD166 antigen OS=Homo sapiens OX=9606 GN=ALCAM PE=1 SV=2	ALCAM
Q13790	0.92	1.167	1.106	1.225	2.716	1.371	1.155	2.318	1.301	2.016	1.282	0.626	1.174	0.532	0.789	0.817	0.796	0.023	0.686	0.05	1.49	0.922	1.613	2.011	1.382	1.364	1.913	0.972	1.103	2.822	0.731187	0.103941	nosig	Apolipoprotein F OS=Homo sapiens OX=9606 GN=APOF PE=1 SV=2	APOF
Q13797	1.507	1.027	1.214	1.351	0.942	2.272	1.068	0.965	1.189	1.844	1.197	0.694	1.583	1.121	0.826	1.994	0.895	0.61	1.539	0.596	0.524	0.942	1.202	1.078	0.873	1.931	1.792	1.117	1.189	1.201	0.855968	0.263183	nosig	Integrin alpha-9 OS=Homo sapiens OX=9606 GN=ITGA9 PE=1 SV=2	ITGA9
Q13835	1.313	1.491	1.065	1.324	0.985	1.03	2.137	0.837	1.194	1.581	1.726	1.55	0.907	0.873	0.805	1.08	1.76	0.411	0.673	0.075	1.523	0.559	0.948	1.096	0.889	3.217	1.281	1.433	2.043	1.46	0.938064	0.681155	nosig	Plakophilin-1 OS=Homo sapiens OX=9606 GN=PKP1 PE=1 SV=2	PKP1
Q13867	0.977	0.908	0.743	1.309	1.12	1.131	0.971	0.744	0.775	0.771	1.336	1.105	1.24	1.046	1.416	0.849	1.48	1.726	0.684	1.148	1.612	0.894	1.215	1.744	1.059	0.954	1.219	1.154	1.425	1.357	1.30506	0.00325791	up	Bleomycin hydrolase OS=Homo sapiens OX=9606 GN=BLMH PE=1 SV=1	BLMH
Q14005	0.218	0.272	0.53	0.466	0	0	0	0	0.443	0.365	0.348	0	0	0	0.111	0	0.298	0.882	1.888	2.483	1.784	2.332	0	0.666	0.208	0	2.206	1.962	0	0.667	3.45139	0.0173344	up	Pro-interleukin-16 OS=Homo sapiens OX=9606 GN=IL16 PE=1 SV=4	IL16
Q14019	0.566	0.65	0.957	2.446	0.596	0.798	0.614	1.097	0.454	1.028	0.313	1.364	0.45	0.581	0.393	0.53	0.405	1.356	0.603	4.653	0.2	2.322	0.645	0.939	0.32	0.388	1.999	0.786	0.875	0.5	1.06572	0.838816	nosig	Coactosin-like protein OS=Homo sapiens OX=9606 GN=COTL1 PE=1 SV=3	COTL1
Q14112	1.06	1.208	1.14	1.608	1.371	1.245	1.289	0.921	1.186	1.424	1.087	1.281	1.038	1.045	1.176	0.926	1.138	1.267	1.427	1.318	0.85	0.969	1.222	1.268	0.882	1.021	0.762	1.165	1.179	1.095	0.88805	0.0711683	nosig	Nidogen-2 OS=Homo sapiens OX=9606 GN=NID2 PE=1 SV=3	NID2
Q14118	0.783	0.555	0.621	0	0.591	0.447	0.788	1.021	0.674	0.675	0.928	1.118	1.093	0.978	2.546	1.447	1.46	0.257	0.819	2.324	1.51	1.839	0.722	1.59	1.334	0.535	1.025	0.95	1.457	0.988	2.02437	0.00024996	up	Dystroglycan OS=Homo sapiens OX=9606 GN=DAG1 PE=1 SV=2	DAG1
Q14126	0.678	0.614	0.89	0.77	1.15	0.605	0.85	0.73	0.997	0.953	0.8	0.605	1.079	0.873	1.586	1.597	0.723	2.21	1.004	2.056	1.23	2.317	0.816	0.98	0.901	1.045	0.782	0.957	0.92	1.007	1.42576	0.00995344	up	Desmoglein-2 OS=Homo sapiens OX=9606 GN=DSG2 PE=1 SV=2	DSG2
Q14152	0	0	0	0.201	0	0.324	1.668	1.738	0.244	0	0	0	0	0	0	0	1.612	0	0	0.386	1.572	2.157	1.129	0	1.34	1.385	0	1.281	1.439	1.143	1.61006	0.366448	nosig	Eukaryotic translation initiation factor 3 subunit A OS=Homo sapiens OX=9606 GN=EIF3A PE=1 SV=1	EIF3A
Q14204	1.191	1.81	0	1.069	0	0	2.243	0.988	2.681	0	0.971	0	0.094	0.876	1.726	1.158	0.801	1.098	0.184	1.17	1.322	1.338	0.839	0.91	0.235	0	0	1.034	1.214	0.746	0.787217	0.542209	nosig	Cytoplasmic dynein 1 heavy chain 1 OS=Homo sapiens OX=9606 GN=DYNC1H1 PE=1 SV=5	DYNC1H1
Q14210	0.573	0.388	0	0.99	0	0.363	0	0	0.941	0.997	0	0.82	0.207	0	1.613	0.37	0	2.317	0.355	0.689	1.809	2.073	0.512	1.105	0.776	3.728	0	0.503	0.77	0	2.07514	0.0872453	nosig	Lymphocyte antigen 6D OS=Homo sapiens OX=9606 GN=LY6D PE=1 SV=1	LY6D
Q14247	1.331	1.579	1.132	1.652	0.795	1.481	1.303	1.4	1.51	1.443	1.375	1.378	1.226	1.407	0.784	1.499	1.754	0.564	1.048	0.306	1.453	0.879	1.384	0.971	1.382	1.231	0.875	1.053	1.377	1.356	0.855057	0.0878002	nosig	Src substrate cortactin OS=Homo sapiens OX=9606 GN=CTTN PE=1 SV=2	CTTN
Q14314	1.633	2.224	1.238	1.607	1.198	1.158	1.778	1.045	1.018	1.412	1.914	1.417	1.208	1.17	0.894	1.332	2.077	0.637	0.918	0.22	0.995	0.667	0.98	1.245	1.121	1.208	0.952	0.946	1.832	1.114	0.798232	0.0773214	nosig	Fibroleukin OS=Homo sapiens OX=9606 GN=FGL2 PE=1 SV=1	FGL2
Q14315	1.598	1.521	1.127	0.98	1.649	1.151	1.747	1.394	1.444	0.94	2.019	1.387	1.025	1.291	1.131	0.841	1.643	0.24	1.293	0.342	1.003	1.013	1.496	1.094	1.807	0.972	1.004	1.585	1.389	0.822	0.863294	0.178501	nosig	Filamin-C OS=Homo sapiens OX=9606 GN=FLNC PE=1 SV=3	FLNC
Q14324	4.341	1.623	0	0.565	0.711	1.289	0	1.053	0.926	0	1.495	1.19	0.761	1.819	0.808	0.587	1.884	0	1.666	0	0.509	0.355	1.545	1.054	1.224	1.185	1.191	1.375	1.008	0	0.935287	0.876578	nosig	Myosin-binding protein C, fast-type OS=Homo sapiens OX=9606 GN=MYBPC2 PE=1 SV=2	MYBPC2
Q14376	2.051	1.229	1.269	0.597	0.963	1.386	2.194	1.367	1.215	0.792	1.42	0.916	0.914	0.331	1.71	0.619	0.811	1.37	0.735	1.322	0.573	1.413	0.538	1.501	0.914	0.859	1.059	0.631	1.217	2.359	0.811912	0.216479	nosig	UDP-glucose 4-epimerase OS=Homo sapiens OX=9606 GN=GALE PE=1 SV=2	GALE
Q14444	0.814	1.725	2.14	0.686	2.097	1.743	1.518	1.605	1.268	2.88	0.916	1.333	1.771	1.104	0.342	1.188	1.988	0.124	1.079	0.33	0.657	0.579	1.877	1.002	1.172	0.995	1.048	1.589	1.215	1.169	0.651797	0.0268961	down	Caprin-1 OS=Homo sapiens OX=9606 GN=CAPRIN1 PE=1 SV=2	CAPRIN1
Q14515	0.583	0.595	0.671	0.928	0.651	0.812	0.776	0.581	0.539	0.822	1.171	0.506	0.605	0.757	7.155	0.903	0.77	1.389	0.891	1.263	1.119	1.43	0.693	0.691	0.859	0.902	0.612	0.832	1.193	0.635	1.75165	0.119051	nosig	SPARC-like protein 1 OS=Homo sapiens OX=9606 GN=SPARCL1 PE=1 SV=2	SPARCL1
Q14517	0.555	0.722	0.677	0.414	0.61	1.187	4.356	0.367	0.935	0.715	0.546	0.862	0.875	0.517	0.549	1.082	0.67	0	0.48	6.199	0.526	0.519	0.699	0.595	0.252	0.764	0.786	0.391	0.523	0.284	0.812251	0.67938	nosig	Protocadherin Fat 1 OS=Homo sapiens OX=9606 GN=FAT1 PE=1 SV=2	FAT1
Q14520	1.402	1.76	1.428	1.621	1.544	1.322	1.83	1.365	1.701	1.525	1.294	1.303	1.186	1.227	0.921	1.542	1.335	0.614	1.034	0.341	0.954	0.838	1.382	1.052	1.161	0.952	0.964	1.072	1.144	1.16	0.692864	4.22E-06	down	Hyaluronan-binding protein 2 OS=Homo sapiens OX=9606 GN=HABP2 PE=1 SV=1	HABP2
Q14525	0.142	0.209	0.177	0.1	0.251	0.151	0.172	0.16	0.073	0.089	12.289	0.15	0.135	0.12	15.49	0.249	0.061	0.054	0.03	0.06	0.144	0.04	0.169	0.132	0.045	0.15	0.104	0.157	0.116	0.138	9.78773	0.177101	nosig	Keratin, type I cuticular Ha3-II OS=Homo sapiens OX=9606 GN=KRT33B PE=1 SV=3	KRT33B
Q14532	0.064	0.21	0.093	0.199	0.148	0.125	0	0.152	0.089	0.162	17.109	0.035	0.184	0	5.621	0	0.033	0.786	0	0.131	0.334	0.468	0.486	0.375	0.524	0	0	0.12	0.038	0.177	10.6365	0.187549	nosig	Keratin, type I cuticular Ha2 OS=Homo sapiens OX=9606 GN=KRT32 PE=1 SV=3	KRT32
Q14624	1.423	1.419	1.527	1.333	1.703	1.264	1.371	1.44	1.428	1.467	1.32	1.178	1.479	1.071	0.716	1.319	1.382	0.376	1.388	0.394	1.366	0.963	1.332	1.193	1.229	1.061	1.403	1.072	1.014	1.325	0.785426	0.000630836	nosig	Inter-alpha-trypsin inhibitor heavy chain H4 OS=Homo sapiens OX=9606 GN=ITIH4 PE=1 SV=4	ITIH4
Q14677	1.117	0	1.105	0	0	0.983	0	1.326	0	1.039	0	0	0	0	0	0.578	0.533	0	0	1.558	0.376	1.524	0.644	0	0.861	0	1.949	0	1.362	1.209	0.950987	0.909894	nosig	Clathrin interactor 1 OS=Homo sapiens OX=9606 GN=CLINT1 PE=1 SV=1	CLINT1
Q14683	0.356	0.294	0	0	0.255	0.341	0.327	0.334	0	0.135	0.602	0	1.649	0	0.707	3.564	0.705	2.114	0	2.942	0	0.632	0.127	0.229	0	0	0	1.046	0	0	3.50563	0.0462922	up	Structural maintenance of chromosomes protein 1A OS=Homo sapiens OX=9606 GN=SMC1A PE=1 SV=2	SMC1A
Q14766	1.437	1.397	1.376	1.519	1.326	1.37	1.419	1.317	1.422	1.489	1.074	1.243	1.149	0.993	0.674	1.213	0.934	0.6	1.354	0.785	1.021	1.198	1.26	1.372	1.257	1.016	1.323	1.104	1.256	1.131	0.780166	4.08E-06	nosig	Latent-transforming growth factor beta-binding protein 1 OS=Homo sapiens OX=9606 GN=LTBP1 PE=1 SV=4	LTBP1
Q14767	0.031	1.644	0.025	0.022	0	0	0.044	7.485	1.672	1.537	0.049	3.412	1.42	0	2.627	2.05	1.665	0.616	1.697	0.478	0.198	0.145	0.148	2.041	0.115	0.06	1.326	0.115	0.212	0	0.737319	0.678537	nosig	Latent-transforming growth factor beta-binding protein 2 OS=Homo sapiens OX=9606 GN=LTBP2 PE=1 SV=3	LTBP2
Q14789	5.998	0.793	0.948	0.37	1.16	0.697	0.822	0.857	0.697	0.527	2.095	0.942	0.968	1.892	0.899	1.441	2.109	0	2.073	0.207	0.59	0.434	1.059	1.338	1.373	1.365	0.725	1.621	1.405	0.805	0.906869	0.830441	nosig	Golgin subfamily B member 1 OS=Homo sapiens OX=9606 GN=GOLGB1 PE=1 SV=2	GOLGB1
Q14847	1.414	0.322	0.899	0.622	0.216	0.519	0.366	0.411	0	0.529	0.844	0.35	0	1.007	1.211	0.412	0	0.969	0.37	4.115	1.689	1.304	0	0.605	0.153	0.169	4.05	0.233	0.464	0	1.69356	0.223076	nosig	LIM and SH3 domain protein 1 OS=Homo sapiens OX=9606 GN=LASP1 PE=1 SV=2	LASP1
Q15029	1.563	0.906	1.215	2.62	1.039	1.583	0.823	0.991	0.891	1.191	1.162	0.726	0	0.91	0.767	0.927	1.131	1.935	1.145	1.34	1.102	0.979	0	0	0.949	0.645	0	1.055	0	0.428	0.59277	0.0222826	down	116 kDa U5 small nuclear ribonucleoprotein component OS=Homo sapiens OX=9606 GN=EFTUD2 PE=1 SV=1	EFTUD2
Q15075	1.193	1.251	1.622	1.016	1.541	1.425	1.481	1.519	1.518	1.189	1.357	1.268	1.469	1.128	0.612	1.298	1.277	0.139	1.595	0.521	1.004	1.004	2.069	1.19	0.998	1.084	1.186	1.255	1.581	1.18	0.843875	0.0640943	nosig	Early endosome antigen 1 OS=Homo sapiens OX=9606 GN=EEA1 PE=1 SV=2	EEA1
Q15113	1.611	1.393	1.179	1.206	1.176	1.062	1.577	1.289	2.008	1.243	0.861	1.214	0.916	0.573	0.765	0.742	0.977	1.556	1.132	0.839	1.311	1.777	1.189	1.286	1.021	1.302	0.938	1.074	1.201	0.587	0.773465	0.0124111	nosig	Procollagen C-endopeptidase enhancer 1 OS=Homo sapiens OX=9606 GN=PCOLCE PE=1 SV=2	PCOLCE
Q15149	1.452	2.18	1.586	1.85	0.672	0.935	1.109	0.604	0.638	0.846	2.65	1.374	2.13	0.774	1.033	0.948	2.412	0.285	1.667	0.297	1.192	0.483	0.709	1.716	1.157	1.492	1.328	1.289	0.848	1.426	1.06174	0.749151	nosig	Plectin OS=Homo sapiens OX=9606 GN=PLEC PE=1 SV=3	PLEC
Q15166	1.16	1.3	1.185	1.444	2.247	1.111	0.994	1.185	1.187	0.913	1.825	0.782	1.047	1.742	0.424	0.814	2.122	0.137	1.617	0.006	1.098	0.935	1.932	1.102	1.825	1.22	1.899	1.437	1.605	1.385	0.980434	0.890514	nosig	Serum paraoxonase/lactonase 3 OS=Homo sapiens OX=9606 GN=PON3 PE=1 SV=3	PON3
Q15223	0.526	0.398	0.395	0.385	0.379	1.059	0.4	0.383	0.402	0.338	0.619	1.021	0.65	0.48	1.601	0.508	0.433	2.484	1.326	4.09	0.8	2.426	0.504	1.617	0.575	0.627	0.432	1.87	0.735	0.624	2.5104	0.00434612	up	Nectin-1 OS=Homo sapiens OX=9606 GN=NECTIN1 PE=1 SV=3	NECTIN1
Q15262	0.879	0.586	1.435	0.668	0.13	0	0.298	0	1.617	0.21	1.152	1.275	0.887	0.41	1.656	0.619	0.509	3.368	1.331	3.092	0.542	1.286	0.407	0.754	0.613	0.939	0.551	1.157	0.466	0.255	1.82629	0.0770955	nosig	Receptor-type tyrosine-protein phosphatase kappa OS=Homo sapiens OX=9606 GN=PTPRK PE=1 SV=2	PTPRK
Q15293	0.878	1.17	1.29	1.022	1.437	0.892	1.002	1.141	1.277	1.602	0.994	1.198	1.661	1.144	0.977	1.934	1.114	0.906	1.801	0.901	1.481	0.772	1.552	1.04	1.17	1.113	1.149	1.007	0.833	1.116	1.01883	0.833512	nosig	Reticulocalbin-1 OS=Homo sapiens OX=9606 GN=RCN1 PE=1 SV=1	RCN1
Q15365	0.884	0.951	1.662	1.176	0.718	1.522	0.789	1.959	0.568	1.011	0	1.461	0.197	0.692	1.468	0.351	0.473	0.615	0.418	2.506	0.939	1.613	0.662	1.292	0.199	0.456	3.203	1.393	1	0.921	0.883407	0.571529	nosig	Poly(rC)-binding protein 1 OS=Homo sapiens OX=9606 GN=PCBP1 PE=1 SV=2	PCBP1
Q15370	0	0.661	0.249	0.721	0.318	0.263	0	1.062	0.282	0.673	0	0.462	0	0.364	4.384	0.478	0	0.999	0	1.661	0	0.579	0	1.314	0	0	3.177	0	0.264	0.362	1.66044	0.334006	nosig	Elongin-B OS=Homo sapiens OX=9606 GN=ELOB PE=1 SV=1	ELOB
Q15404	0.689	0.285	2.256	0.901	0.42	0.832	0.46	0.756	1.049	0.379	0.104	0.451	0.126	1.057	0.582	0.547	0.173	0.798	0.915	4.507	0.707	2.097	1.981	0.424	0.583	0.162	5.044	0.344	0.381	0.291	1.32515	0.471769	nosig	Ras suppressor protein 1 OS=Homo sapiens OX=9606 GN=RSU1 PE=1 SV=3	RSU1
Q15459	1.492	1.887	2.233	0.769	0.885	1.082	1.566	1.343	1.421	1.963	1.413	1.715	1.681	0.944	0.337	0.716	1.076	0	0.937	0	1.118	1.104	1.904	1.437	0.634	1.628	0.875	0.911	1.773	0.661	0.71252	0.0424345	down	Splicing factor 3A subunit 1 OS=Homo sapiens OX=9606 GN=SF3A1 PE=1 SV=1	SF3A1
Q15465	2.019	1.251	2.014	0.885	1.443	1.432	1.572	1.471	1.649	1.409	0.859	0.968	1.263	1.435	0.84	1.923	1.353	0	1.147	0.381	0.83	0.629	1.245	0.954	1.507	1.357	0.974	1.098	0.855	1.431	0.694916	0.00373513	down	Sonic hedgehog protein OS=Homo sapiens OX=9606 GN=SHH PE=1 SV=1	SHH
Q15485	1.634	0.943	0.83	1.25	1.206	3.605	1.172	0.759	1.78	1.276	1.198	1.302	1.356	0.906	0.773	1.432	1.305	0.824	2.405	0.67	0.55	0.646	1.472	0.392	0.696	0.964	2.134	1.237	0.868	0.848	0.760221	0.245284	nosig	Ficolin-2 OS=Homo sapiens OX=9606 GN=FCN2 PE=1 SV=2	FCN2
Q15582	1.015	0.815	0.537	1.093	0.935	0.756	1.027	1.082	1.344	0.785	1.3	1.511	0.977	0.938	1.748	1.605	1.226	1.589	1.22	1.166	1.336	1.262	1.038	1.452	0.782	1.113	0.566	1.127	1.189	1.364	1.3052	0.00660194	up	Transforming growth factor-beta-induced protein ig-h3 OS=Homo sapiens OX=9606 GN=TGFBI PE=1 SV=1	TGFBI
Q15828	1.115	0.53	0.617	1.232	1.086	0.357	1.238	0.81	0.919	1.287	0.951	0.658	0.62	0.858	2.145	0.432	0.967	1.463	1.05	1.716	1.731	1.671	1.08	0.975	0.884	1.692	1.005	1.229	1.066	1.353	1.28093	0.0841482	nosig	Cystatin-M OS=Homo sapiens OX=9606 GN=CST6 PE=1 SV=1	CST6
Q15848	0.599	1.083	1.133	1.191	1.122	1.06	0.999	1.365	1.188	1.146	1.212	0.985	1.031	0.88	0.928	1.352	0.919	2.463	0.81	0.975	1.018	1.838	1.225	1.507	0.884	1.292	1.044	0.895	0.884	0.788	1.05319	0.603229	nosig	Adiponectin OS=Homo sapiens OX=9606 GN=ADIPOQ PE=1 SV=1	ADIPOQ
Q15907	0.41	0.785	1.371	1.095	0.461	0.294	0.539	1.439	0.278	0.653	0.559	2.109	0.291	0.427	0.786	0.16	0.263	0.467	0.158	5.888	0.371	2.606	0.441	1.877	0.746	0.613	0.591	0.444	0.821	0.384	1.36532	0.420625	nosig	Ras-related protein Rab-11B OS=Homo sapiens OX=9606 GN=RAB11B PE=1 SV=4	RAB11B
Q16270	0.675	0.582	0.213	0.178	0.384	0.826	0.642	0.533	0.493	0.503	0.651	1.497	0.889	0.43	4.759	1.246	0.661	3.15	0.81	2.443	1.406	0.998	0.548	0.903	0.687	0.688	0.618	0.718	0.61	0.688	2.42593	0.00858393	up	Insulin-like growth factor-binding protein 7 OS=Homo sapiens OX=9606 GN=IGFBP7 PE=1 SV=1	IGFBP7
Q16531	0	0.353	0.314	0.367	1.938	0.322	3.111	1.891	1.77	0	0.212	0.105	3.178	2.077	2.599	2.211	0	0.33	0.208	0.223	0	0.065	3.064	0	0.382	0	0.143	0	1.341	2.022	0.902046	0.820075	nosig	DNA damage-binding protein 1 OS=Homo sapiens OX=9606 GN=DDB1 PE=1 SV=1	DDB1
Q16555	0.484	0.47	0.938	0.842	1.271	0.901	2.551	0	0.53	0.888	0.563	0	1.087	0	1.561	0.469	0.678	4.328	0.658	0.577	0.593	0.23	1.492	1.288	0	0.973	2.014	1.141	0.622	1.236	1.09915	0.774927	nosig	Dihydropyrimidinase-related protein 2 OS=Homo sapiens OX=9606 GN=DPYSL2 PE=1 SV=1	DPYSL2
Q16610	0.607	1.119	0.554	1.018	0.926	0.928	0.917	0.786	0.843	1.095	1.852	0.531	1.35	0.763	0.429	0.861	1.607	3.25	1.046	1.812	1.134	1.004	0.878	0.841	1.275	1.337	0.586	0.782	1.317	1.232	1.3583	0.0486959	up	Extracellular matrix protein 1 OS=Homo sapiens OX=9606 GN=ECM1 PE=1 SV=2	ECM1
Q16627	0.948	0.961	1.004	0.761	1.043	0.81	0.999	1.048	1.138	0.917	1.102	1.209	1.514	0.911	1.915	0.689	1.175	0.756	1.124	1.571	2.91	0.933	0.995	1.177	1.141	0.845	0.687	1.111	1.126	1.496	1.26633	0.0408728	nosig	C-C motif chemokine 14 OS=Homo sapiens OX=9606 GN=CCL14 PE=1 SV=1	CCL14
Q16658	1.199	1.115	0.837	1.334	0.729	0.616	0.68	1.331	1.355	1.121	0.552	0.655	1.833	0.603	2.055	1.169	2.389	0.946	1.008	0.223	1.751	1.417	1.385	2.238	0.76	0.453	2.163	1.845	0.693	1.055	1.22095	0.203211	nosig	Fascin OS=Homo sapiens OX=9606 GN=FSCN1 PE=1 SV=3	FSCN1
Q16663	0.815	0	0	0.77	0	0.35	0	0	0.565	0.928	1.404	1.064	0	1.038	2.295	0.777	1.109	0.075	0.59	2.159	0	0.694	0	0.987	1.339	0.588	0.98	1.49	0	1.718	2.67022	0.00779126	up	C-C motif chemokine 15 OS=Homo sapiens OX=9606 GN=CCL15 PE=1 SV=2	CCL15
Q16706	1.041	1.352	1.319	1.415	1.531	1.436	1.297	1.189	1.541	1.506	1.216	1.019	0.99	1.073	0.989	1.043	1.553	0.892	1.497	0.838	1.063	0.92	1.394	1.074	1.047	1.104	0.86	1.101	1.242	1.29	0.814743	0.00110097	nosig	Alpha-mannosidase 2 OS=Homo sapiens OX=9606 GN=MAN2A1 PE=1 SV=2	MAN2A1
Q16769	0	0.26	1.188	0.4	0.231	0.283	0.205	2.257	2.19	1.84	1.098	1.14	0.152	1.439	0	0.186	1.399	2.695	1.855	0	0.557	2.004	1.457	0.279	1.447	1.984	0.233	1.635	1.919	1.21	1.28129	0.467607	nosig	Glutaminyl-peptide cyclotransferase OS=Homo sapiens OX=9606 GN=QPCT PE=1 SV=1	QPCT
Q16775	1.634	1.446	1.48	1.67	1.882	1.864	1.93	1.881	2	2.153	0.017	1.418	1.369	0.032	1.003	0.257	0.028	1.188	0.03	0.529	1.427	1.114	1.667	1.043	2.037	1.45	0.195	1.6	0.015	1.992	0.513127	3.71E-05	down	Hydroxyacylglutathione hydrolase, mitochondrial OS=Homo sapiens OX=9606 GN=HAGH PE=1 SV=2	HAGH
Q16777	0.631	1.057	0.416	0.621	0.791	1.64	0.379	0.731	0.183	0.429	0.53	0.157	0.176	0.01	13.992	0.397	0.155	0.352	0	0.422	0	0.332	0.021	0.159	0.126	0.929	0.89	0.781	0	0.769	1.4683	0.649914	nosig	Histone H2A type 2-C OS=Homo sapiens OX=9606 GN=H2AC20 PE=1 SV=4	H2AC20
Q16778	0.632	0.817	0.979	0.769	1.081	1.167	0.642	0.867	0.502	1.125	1.674	1.622	1.291	1.229	1.062	1.232	2.444	0.241	1.244	0.325	1.239	0.774	2.308	1.658	1.198	0.9	1.543	1.531	3.208	1.274	1.63134	0.00352597	up	Histone H2B type 2-E OS=Homo sapiens OX=9606 GN=H2BC21 PE=1 SV=3	H2BC21
Q16819	0.85	1.169	1.019	0.891	1.011	1.012	0.92	1.715	1.018	3.134	0.642	0.711	0.621	1.08	0.47	0.649	0.684	1.416	0.957	3.837	0.46	0.987	0.901	0.863	0.961	0.517	0.751	0.769	0.592	0.571	0.723722	0.214426	nosig	Meprin A subunit alpha OS=Homo sapiens OX=9606 GN=MEP1A PE=1 SV=2	MEP1A
Q16822	2.039	0.912	1.347	1.066	1.202	2.685	1.16	1.098	1.647	1.32	1.476	1.014	1.621	2.164	0.686	1.228	1.13	0.716	1.83	0.359	0.664	0.576	1.566	0.705	0.777	1.131	1.858	0.745	0.946	1.335	0.778081	0.134401	nosig	Phosphoenolpyruvate carboxykinase [GTP], mitochondrial OS=Homo sapiens OX=9606 GN=PCK2 PE=1 SV=4	PCK2
Q16851	0.062	0.476	0.949	0.186	0.946	0.249	1.869	0.657	0.414	1.162	0.109	1.248	0.149	7.891	5.382	0.186	0.351	1.289	0.635	1.054	0	0.754	0	0	0.101	0.114	1.597	0.37	0.324	0.097	1.55316	0.429747	nosig	UTP--glucose-1-phosphate uridylyltransferase OS=Homo sapiens OX=9606 GN=UGP2 PE=1 SV=5	UGP2
Q16853	1.638	1.176	0.635	1.73	0.989	1.056	0.535	1.286	1.439	2.123	1.387	0.843	1.016	0.737	0.598	0.84	1.18	2.274	1.06	0.806	0.763	1.866	0.901	0.784	1.164	0.751	1.619	1.856	0.784	0.584	0.865115	0.378418	nosig	Membrane primary amine oxidase OS=Homo sapiens OX=9606 GN=AOC3 PE=1 SV=3	AOC3
Q3LXA3	0.112	0.306	0.359	0.371	0.668	0.078	0	0.283	0.132	0	0.097	3.01	0.361	12.573	3.527	0.784	0.288	0.113	0.162	1.911	0.214	0.853	0.212	0.726	0.08	0.23	0.339	0	0.292	0.149	5.61304	0.110102	nosig	Triokinase/FMN cyclase OS=Homo sapiens OX=9606 GN=TKFC PE=1 SV=2	TKFC
Q4G148	0	0.249	0.25	1.453	0.283	0	0.334	1.267	1.108	0	2.541	1.582	1.744	1.169	0	0	1.726	0.773	1.334	0.432	1.183	0	0	0	1.88	1.608	0	0	0	2.156	1.83333	0.131032	nosig	Glucoside xylosyltransferase 1 OS=Homo sapiens OX=9606 GN=GXYLT1 PE=1 SV=2	GXYLT1
Q4LDE5	1.107	1.582	1.565	1.131	0.815	1.74	1.232	1.298	1.521	1.767	1.583	1.433	1.195	1.229	0.97	0.607	1.15	0.223	1.163	0.563	0.925	1.63	1.282	1.044	1.313	2.083	0.134	1.187	1.65	1.347	0.825374	0.108932	nosig	Sushi, von Willebrand factor type A, EGF and pentraxin domain-containing protein 1 OS=Homo sapiens OX=9606 GN=SVEP1 PE=1 SV=3	SVEP1
Q53FA7	0	1.237	0.414	0	0.634	1.227	0	0	0.679	1.102	0.204	0.632	0.678	2.826	2.484	0.737	1.466	0	0	2.428	0.864	0.497	0	0.743	0.307	0.753	1.179	1.245	0.976	0.742	1.77225	0.109965	nosig	Quinone oxidoreductase PIG3 OS=Homo sapiens OX=9606 GN=TP53I3 PE=1 SV=2	TP53I3
Q53RD9	1.312	0	0.915	0.932	0.875	1.457	1.242	1.175	0.765	1.539	0.552	0.805	1.018	0.827	1.216	0.387	0.765	4.62	1.611	0.88	0.862	0.755	0.735	0.888	0.973	0.969	0.933	1.107	0.722	0.609	1.03966	0.867605	nosig	Fibulin-7 OS=Homo sapiens OX=9606 GN=FBLN7 PE=2 SV=1	FBLN7
Q53YU7	1.064	0.728	0.689	1.268	0.692	1.053	0.772	0.702	0.555	1.396	1.233	1.104	0.676	0.66	1.007	0.305	1.289	2.151	0.564	1.977	2.078	1.028	1.472	1.012	1.669	1.085	0.697	1.882	0.8	1.099	1.33356	0.0554881	nosig	Foveolin OS=Homo sapiens OX=9606 GN=GKN1 PE=1 SV=1	GKN1
Q53Z42	0.056	1.966	2.715	3.072	2.694	2.266	0	2.822	0	2.582	0	0.095	2.001	0	0.239	2.592	0.065	0.576	0.361	0.194	0.721	0.307	0	0.04	0	2.871	0.37	0.098	0.337	0	0.298988	0.0136101	down	HLA class I antigen OS=Homo sapiens OX=9606 GN=HLA-A PE=1 SV=1	HLA-A
Q562R1	0.897	0.747	1.29	0.507	0.555	1.107	0.932	1.316	0.869	1.108	0.337	0.641	0.414	1.062	2.065	0.559	0.553	0.929	0.623	2.554	1.142	1.923	0.476	1.31	0.386	1.028	3.872	0.881	0.848	0.607	1.1905	0.419001	nosig	Beta-actin-like protein 2 OS=Homo sapiens OX=9606 GN=ACTBL2 PE=1 SV=2	ACTBL2
Q5BLP8	1.317	0	2.931	1.756	1.649	1.715	0.677	1.544	0	1.67	0	0.592	0	0.559	0	1.125	1.524	1.724	0.513	0	0	0	0.865	0	1.447	0.332	0	0	0	0.477	0.34535	0.0150432	down	Neuropeptide-like protein C4orf48 OS=Homo sapiens OX=9606 GN=C4orf48 PE=1 SV=3	C4orf48
Q5D862	0.464	0.323	1.012	0.246	0	0	1.391	0	1.158	0.352	0	0.543	0.451	0	0.359	1.34	0	0	0.557	0	0.277	0	0.483	0.73	0	11.372	0	0	0.384	0.683	1.73666	0.537732	nosig	Filaggrin-2 OS=Homo sapiens OX=9606 GN=FLG2 PE=1 SV=1	FLG2
Q5JPE7	1.126	0.953	0.864	1.083	1.381	1.152	1.384	0.992	0.848	1.224	1.08	1.077	1.538	0.818	0.976	1.986	1.229	1.166	1.566	0.976	1.082	0.992	0.999	1.107	1.416	0.979	0.889	1.896	1.066	1.254	1.09439	0.277953	nosig	Nodal modulator 2 OS=Homo sapiens OX=9606 GN=NOMO2 PE=1 SV=1	NOMO2
Q5JXI8	0	2.107	1.142	1.782	1.005	0.701	0.788	1.059	1.651	1.789	0	0.645	0	0.28	0.691	0	0.198	0.43	0	2.08	0.1	2.555	2.08	0.652	0	0	0.778	0	0	0.011	0.436627	0.0190319	down	Four and a half LIM domains protein 1 (Fragment) OS=Homo sapiens OX=9606 GN=FHL1 PE=1 SV=1	FHL1
Q5R349	1.167	1.083	0.989	1.298	1.088	0.924	1.382	1.166	1.217	0.962	1.181	1.434	1.535	1.692	0.635	1.085	1.076	0.506	1.913	1.231	1.37	1.458	1.23	1.445	0.961	0.597	0.937	1.058	1.458	1.04	1.0572	0.496933	nosig	p-selectin (Fragment) OS=Homo sapiens OX=9606 GN=SELP PE=1 SV=2	SELP
Q5SR44	0.397	0.34	0.323	0.88	0.338	0.399	0	0.426	0.339	0.426	0.595	0.547	1.675	1.489	0.787	0.843	0.616	2.972	1.809	3.592	1.517	1.527	0.493	1.498	0.522	0.447	0.558	0.684	0.598	0	2.94325	0.00166322	up	Complement receptor type 1 OS=Homo sapiens OX=9606 GN=CR1 PE=1 SV=1	CR1
Q5SRN7	1.954	0.374	1.546	0	0.27	0	0.398	0	0	0.014	0	0.695	0	0.207	1.657	0	0.602	2.449	0	0.418	2.006	1.578	0	0.112	0	2.757	1.521	0	0.193	0	1.55784	0.412463	nosig	HLA class I histocompatibility antigen, A alpha chain OS=Homo sapiens OX=9606 GN=HLA-A PE=1 SV=2	HLA-A
Q5T123	1.148	0.83	1.232	1.22	0.02	1.073	0.594	0.89	0.926	0.666	0.206	2.227	0.296	0.388	0.777	0.375	0.283	0.996	0.525	4.106	0.635	3.04	0.579	1.73	0.285	0.333	1.668	0.779	1.047	0.504	1.20822	0.496717	nosig	SH3 domain-binding glutamic acid-rich-like protein 3 OS=Homo sapiens OX=9606 GN=SH3BGRL3 PE=1 SV=1	SH3BGRL3
Q5T5C0	1.416	1.283	1.361	1.037	1.696	1.572	1.227	1.395	1.176	1.097	1.149	1.407	1.717	1.691	1.046	1.426	1.539	0.652	1.783	0.519	0.732	0.749	1.376	0.897	1.221	1.054	1.205	1.12	0.851	1.104	0.876244	0.127124	nosig	Syntaxin-binding protein 5 OS=Homo sapiens OX=9606 GN=STXBP5 PE=1 SV=1	STXBP5
Q5T749	0.21	0.027	2.345	0.953	0.865	0.467	1.166	0.134	0.349	0.815	0.017	0.026	0.036	0.427	0.375	0.24	0.011	0.849	1.198	0.527	0.193	0.708	0.311	1.253	0.025	20.972	0.18	0.032	0.037	0.219	1.88487	0.546094	nosig	Keratinocyte proline-rich protein OS=Homo sapiens OX=9606 GN=KPRP PE=1 SV=1	KPRP
Q5T750	0	0.755	3.583	1.857	1.774	1.09	1.031	0.435	1.038	0.991	0.46	0.369	0.529	1.145	0.443	0.738	0	1.692	0.663	0.428	0.424	0.623	0.75	1.248	0.567	8.551	0.403	0.436	0.3	0.762	0.817708	0.657637	nosig	Skin-specific protein 32 OS=Homo sapiens OX=9606 GN=XP32 PE=1 SV=1	XP32
Q5T7C4	0.195	0	0	0	0.151	0.314	0.106	0.262	0	2.457	1.423	1.812	0	1.422	0.306	1.801	1.996	0.266	1.702	0.356	0	1.034	0	0.916	1.334	2.123	3.258	1.482	0	1.281	3.22984	0.0202627	up	High mobility group protein B1 OS=Homo sapiens OX=9606 GN=HMGB1 PE=1 SV=1	HMGB1
Q5TB53	0.556	0	0	0.318	0.491	0.261	0	0.352	0	0	0.451	0.257	0	0.169	2.961	0.527	0	3.739	0.307	2.897	0.517	0.821	0.485	0.265	0	0.52	0.213	0.385	0	0	3.66886	0.0511939	nosig	Transmembrane 9 superfamily member (Fragment) OS=Homo sapiens OX=9606 GN=TM9SF3 PE=1 SV=8	TM9SF3
Q5TCX8	1.566	1.542	2.073	0.796	1.15	1.216	1.614	1.646	1.406	1.309	1.057	1.029	1.234	1.392	0.853	1.419	1.324	0.354	1.189	0.349	1.19	0.658	1.4	1.35	1.404	1.306	1.233	1.218	1.363	1.435	0.794699	0.0393355	nosig	Mitogen-activated protein kinase kinase kinase 21 OS=Homo sapiens OX=9606 GN=MAP3K21 PE=1 SV=3	MAP3K21
Q5TDP6	0.464	0.605	0.85	0.365	0.73	0.599	0.525	1.016	0.463	0.42	0.863	3.564	1.298	9.78	1.971	0.815	0.962	0.298	0.749	0.847	0.855	0	0.624	0.896	0.38	0.641	1.01	0.453	0.683	0.968	2.29062	0.117521	nosig	Lengsin OS=Homo sapiens OX=9606 GN=LGSN PE=1 SV=1	LGSN
Q5THJ4	0.493	0.168	0.057	0.694	0.147	1.599	0.374	0.433	0	0	0.106	0.394	0.102	0.269	8.443	0.862	0.443	0.667	0.589	1.239	1.546	0.88	0.077	0.894	0.189	4.222	1.821	0.287	0.141	0	2.92194	0.114486	nosig	Vacuolar protein sorting-associated protein 13D OS=Homo sapiens OX=9606 GN=VPS13D PE=1 SV=2	VPS13D
Q5TZA2	1.386	1.934	1.823	0.8	1.815	1.872	1.751	1.333	1.424	1.535	0.767	0.79	1.13	1.54	5.697	0.596	1.035	0.02	0.853	0.142	0.455	0.751	0.643	0.764	1.016	0.437	1.465	0.765	0.562	0.611	0.639284	0.056785	nosig	Rootletin OS=Homo sapiens OX=9606 GN=CROCC PE=1 SV=1	CROCC
Q5VU97	0.924	0.574	1.204	0.777	0.693	0.769	0.581	0.61	1.957	0.612	0.369	0.975	2.228	2.396	0.613	1.478	0	0.133	2.762	3.226	0.689	1.848	0.73	0.68	0.633	0.585	0.389	0.512	0.693	0	1.20325	0.487254	nosig	VWFA and cache domain-containing protein 1 OS=Homo sapiens OX=9606 GN=CACHD1 PE=2 SV=2	CACHD1
Q5VVQ6	0.079	0.136	0.817	0.104	0.587	0.961	0.574	0.149	0.114	0.34	0.894	1.144	0.782	1.423	0.239	1.103	0.601	3.581	0.933	2.501	1.321	2.359	1.051	1.241	1.075	1.893	0.888	1.871	0.995	0.37	3.40132	0.000107797	up	Ubiquitin thioesterase OTU1 OS=Homo sapiens OX=9606 GN=YOD1 PE=1 SV=1	YOD1
Q5VY30	1.841	1.838	1.656	1.623	1.184	1.734	2.741	1.634	1.683	1.533	1.436	1.151	1.158	1.245	0.806	0.838	1.606	0.292	0.641	0.249	0.959	0.388	1.533	1.189	1.688	1.11	0.684	1.185	1.05	1.177	0.583529	0.000168323	down	Retinol-binding protein OS=Homo sapiens OX=9606 GN=RBP4 PE=1 SV=2	RBP4
Q5VY43	0	0.446	0.083	0.455	0.167	0.478	0.059	0.528	0.599	0.547	0.722	0.537	0.689	0.363	0.291	0	0.974	6.21	0.743	4.253	0.632	0.594	0.522	1.066	0.306	0.927	0.543	0.926	0.371	0.084	3.08641	0.0533658	nosig	Platelet endothelial aggregation receptor 1 OS=Homo sapiens OX=9606 GN=PEAR1 PE=1 SV=1	PEAR1
Q5ZPR3	0.883	1.672	1.282	1.393	0.721	1.204	1.691	1.022	1.186	1.354	1.658	1.279	1.78	0.634	0.887	0.554	1.417	0.765	2.13	0.932	1.095	1.221	0.872	1.22	2.108	0.64	1.531	0.67	1.156	0.706	0.937097	0.598149	nosig	CD276 antigen OS=Homo sapiens OX=9606 GN=CD276 PE=1 SV=1	CD276
Q63HQ2	1.123	1.303	1.458	0.499	1.699	1.919	2.029	1.377	1.486	1.011	1.18	1.089	0.769	0.936	0.746	1.152	1.367	0	0.95	0.196	1.992	0.514	1.741	0.964	1.609	1.229	1.429	1.342	1.313	2.048	0.811493	0.17094	nosig	Pikachurin OS=Homo sapiens OX=9606 GN=EGFLAM PE=1 SV=2	EGFLAM
Q68BL7	0.347	1.321	0.544	0.616	0.493	1.275	0.718	1.333	2.184	1.701	2.189	1.094	2.738	1.942	0	3.396	1.933	0	1.111	0	1.537	0.489	0.687	0.861	1.162	1.069	0.732	0.909	0.973	1.103	1.13582	0.607832	nosig	Olfactomedin-like protein 2A OS=Homo sapiens OX=9606 GN=OLFML2A PE=2 SV=1	OLFML2A
Q6E0U4	1.616	1.359	1.462	1.344	1.851	1.301	1.313	1.165	0.046	1.667	1.753	1.437	1.462	0.041	0.813	1.536	1.392	0.599	1.623	0.404	1.432	0.823	0.067	1.705	1.381	1.281	1.728	1.316	0.988	1.642	0.892373	0.480365	nosig	Dermokine OS=Homo sapiens OX=9606 GN=DMKN PE=1 SV=3	DMKN
Q6EMK4	0.951	1.016	1.134	1.05	1.078	0.97	1.086	1.107	0.955	0.868	1.137	0.739	0.931	1.08	0.967	1.03	1.332	1.951	0.875	1.686	1.011	1.047	1.156	1.338	1.225	1.016	1.097	1.217	1.209	1.158	1.13568	0.047132	nosig	Vasorin OS=Homo sapiens OX=9606 GN=VASN PE=1 SV=1	VASN
Q6GTS8	0.443	1.373	0	0.924	0.87	0.178	2.06	0	2.403	1.881	0	0.522	0	0.622	0.161	2.215	0.515	1.864	1.876	0	0.604	0	2.18	0	0	2.178	0	1.32	0.172	0	0.702181	0.38686	nosig	N-fatty-acyl-amino acid synthase/hydrolase PM20D1 OS=Homo sapiens OX=9606 GN=PM20D1 PE=1 SV=3	PM20D1
Q6IPX4	1.162	0.693	0.415	2.201	1.691	0.39	0.454	0.634	0.415	1.569	0.52	1.38	0.194	0.34	0.576	1.375	0.506	1.748	0.54	3.933	3.186	0.706	0.408	0.734	1.535	0.421	0.462	0.261	0.608	0	1.00961	0.976085	nosig	40S ribosomal protein S16 OS=Homo sapiens OX=9606 GN=RPS16 PE=1 SV=1	RPS16
Q6KB66	0.556	0.693	1.922	1.675	0.718	1.26	1.294	1.133	0.77	2.067	0	0.964	1.096	0.832	0.951	1.193	0.314	1.599	0.915	0.18	0.509	0.353	0.804	0.805	1.415	7.268	1.256	0.2	0.856	1.1	0.935225	0.837312	nosig	Keratin, type II cytoskeletal 80 OS=Homo sapiens OX=9606 GN=KRT80 PE=1 SV=2	KRT80
Q6P179	0.096	0.214	1.588	3.726	0.124	0.121	0.274	0.669	0	1.104	1.7	2.061	0.192	0.414	1.584	2.144	2.362	2.616	1.58	0.672	0.902	0.959	2.625	0.356	0.218	1.811	0.644	1.354	0.5	0.012	1.56051	0.299185	nosig	Endoplasmic reticulum aminopeptidase 2 OS=Homo sapiens OX=9606 GN=ERAP2 PE=1 SV=2	ERAP2
Q6UVK1	1.284	1.057	1.312	1.257	1.162	1.049	1.366	1.013	1.148	1.146	1.282	0.729	1.17	1.037	1.026	0.828	0.874	1.029	0.803	0.991	1.352	1.921	1.364	0.927	1.176	1.224	0.903	1.218	1.851	1.354	0.977573	0.74459	nosig	Chondroitin sulfate proteoglycan 4 OS=Homo sapiens OX=9606 GN=CSPG4 PE=1 SV=2	CSPG4
Q6UWP8	0.518	0.841	0.64	0.859	0.707	0.252	1.154	0.413	0.691	0.533	0.614	0.359	0.759	0.567	7.012	0.735	0.808	2.629	0.633	1.392	0.762	2.091	0.691	0.772	0.492	0.987	0.539	0.614	0.521	0.507	1.77694	0.147648	nosig	Suprabasin OS=Homo sapiens OX=9606 GN=SBSN PE=1 SV=2	SBSN
Q6UWY5	0	1.221	0.828	0.205	0.689	1.18	1.348	1.021	0	1.512	1.558	0	1.425	0	0.208	1.542	0	1.103	0	0	0	1.826	1.298	0	0	1.344	0	1.363	1.98	0	0.852511	0.637961	nosig	Olfactomedin-like protein 1 OS=Homo sapiens OX=9606 GN=OLFML1 PE=1 SV=2	OLFML1
Q6UX71	0.733	1.033	0.661	0.83	1.305	0.667	0.906	0.711	1.01	0.908	0.915	0.83	0.539	0.82	0.726	1.134	1.303	2.201	1.361	1.745	1.477	1.884	0.908	1.213	1.225	1.131	0.931	1.133	1.228	1.295	1.36918	0.00671534	up	Plexin domain-containing protein 2 OS=Homo sapiens OX=9606 GN=PLXDC2 PE=1 SV=1	PLXDC2
Q6UXB8	1.026	0.9	0.651	0.476	0.456	0.534	1.12	0.755	0.671	0.878	1.306	0.31	0.902	1.075	0.582	0.599	1.36	2.66	0.715	0.662	2.623	2.052	0.552	1.326	1.388	1.444	0.934	1.759	2.68	1.394	1.76262	0.00360305	up	Peptidase inhibitor 16 OS=Homo sapiens OX=9606 GN=PI16 PE=1 SV=1	PI16
Q6UXI7	1.013	0.735	0.829	0.723	0.74	1.372	1.039	0.982	0.748	0.713	1.305	0.425	0.798	0.744	3.229	0.976	0.787	1.56	0.619	1.952	1.087	1.227	1.001	1.187	1.489	0.851	0.395	1.108	1.664	0.922	1.31133	0.0878528	nosig	Vitrin OS=Homo sapiens OX=9606 GN=VIT PE=2 SV=1	VIT
Q6UXK5	0.847	0.349	0.773	0.264	1.594	0.569	0.82	1.14	1.491	0.538	0.566	0.181	0.773	1.207	0.261	0.636	1.14	3.409	0	1.348	1.017	3.459	1.496	0.308	0.811	2.044	0.64	0.467	1.946	0.842	1.34472	0.271089	nosig	Leucine-rich repeat neuronal protein 1 OS=Homo sapiens OX=9606 GN=LRRN1 PE=1 SV=1	LRRN1
Q6UY14	0.804	0.591	0.717	0.886	1.353	0.498	0.77	0.711	1.049	0.893	1.383	0.69	0.817	0.948	1.269	0.755	0.664	2.189	0.688	1.455	1.569	2.462	1.344	1.226	0.81	0.903	0.418	1.127	2.478	1.214	1.4754	0.0151695	up	ADAMTS-like protein 4 OS=Homo sapiens OX=9606 GN=ADAMTSL4 PE=1 SV=2	ADAMTSL4
Q6V0I7	0.428	1.491	1.285	1.028	0.849	1.619	1.223	1.343	1.046	1.702	0.982	1.019	1.319	1.077	0.307	0.844	1.155	0.182	1.037	1.133	0	2.639	1.397	0.793	0.953	1.471	1.007	1.437	2.12	1.239	0.920218	0.598125	nosig	Protocadherin Fat 4 OS=Homo sapiens OX=9606 GN=FAT4 PE=1 SV=2	FAT4
Q6XQN6	1.059	0.637	1.135	0.903	0	1.511	0	0.803	0	1.061	1.057	0	0	0	1.285	0.902	1.261	1.152	1.165	0.945	1.261	1.143	1.155	1.487	1.17	0.853	1.405	1.383	1.489	0.804	1.40083	0.174908	nosig	Nicotinate phosphoribosyltransferase OS=Homo sapiens OX=9606 GN=NAPRT PE=1 SV=2	NAPRT
Q6YHK3	1.23	0.635	0.41	0.939	1.002	0.878	0.692	0.679	0.458	0.634	1.635	0.692	1.173	0.797	0.84	1.069	1.003	1.891	1.108	1.393	1.542	2.963	0.981	1.153	1.402	1.05	1.27	1.368	1.337	0.652	1.6752	0.00103334	up	CD109 antigen OS=Homo sapiens OX=9606 GN=CD109 PE=1 SV=2	CD109
Q6ZMJ2	2.116	1.445	1.047	0.949	1.466	1.484	1.339	1.296	1.339	0.813	1.539	0.443	0.52	0.608	0.834	0.545	0.667	1.786	0.935	1.153	0.813	1.116	0.919	1.184	3.366	1.175	0.855	1.11	0.82	1.045	0.806116	0.167967	nosig	Scavenger receptor class A member 5 OS=Homo sapiens OX=9606 GN=SCARA5 PE=1 SV=1	SCARA5
Q6ZR19	0.846	0.648	0.745	0.547	1.26	0.651	0.957	0.784	1.684	0.404	0.783	1.546	1.542	0.741	1.426	2.446	1.323	1.706	0.374	1.626	2.053	1.436	1.166	1.713	1.022	0.665	0.49	1.105	1.42	0.05	1.44458	0.0418175	up	Receptor-type tyrosine-protein phosphatase beta (Fragment) OS=Homo sapiens OX=9606 GN=PTPRB PE=1 SV=1	PTPRB
Q6ZRP7	0.385	0.535	1.109	0.321	0.84	0.526	0.411	0.332	0.234	0.69	1.757	1.706	0.264	0.89	1.92	0.358	0.902	0.878	0.824	4.164	1.346	1.198	0.313	0.331	0.362	1.356	1.214	0.839	1.543	2.077	2.25172	0.00479395	up	Sulfhydryl oxidase 2 OS=Homo sapiens OX=9606 GN=QSOX2 PE=1 SV=3	QSOX2
Q76LX8	1.088	0.651	1.157	0.827	1.303	1.195	1.116	1.248	1.125	1.053	1.231	1.447	1.036	1.592	0.85	1.018	2.017	1.338	1.226	1.25	0.701	0.546	1.134	1.597	1.027	1.177	1.223	0.96	1.429	1.237	1.1166	0.204727	nosig	A disintegrin and metalloproteinase with thrombospondin motifs 13 OS=Homo sapiens OX=9606 GN=ADAMTS13 PE=1 SV=1	ADAMTS13
Q76M96	0	2.025	1.701	2.153	1.968	0	0	1.602	1.392	2.253	0	0.402	0	0	1.016	0.448	0	0	0.813	1.186	1.112	0.957	0.862	0.946	0.785	0.943	0	0.614	0.524	0.745	0.433519	0.0368861	down	Coiled-coil domain-containing protein 80 OS=Homo sapiens OX=9606 GN=CCDC80 PE=1 SV=1	CCDC80
Q7L4I2	0.888	0.781	1.555	0	1.479	0.686	1.459	0.878	0.653	1.023	0	0	0.589	0.84	0.888	0	1.004	0	0.85	1.355	0	1.467	1.227	2.36	1.078	1.238	1.471	1.28	1.675	0.767	0.961976	0.865777	nosig	Arginine/serine-rich coiled-coil protein 2 OS=Homo sapiens OX=9606 GN=RSRC2 PE=1 SV=1	RSRC2
Q7Z304	0.734	1.114	1.031	0.429	0.731	1.838	1.108	0.777	0.817	0.889	1.006	1.198	0	0.587	5.741	0.779	1.523	0	0.784	0.374	0.707	0.989	1.361	1.261	1.109	0.735	1.216	0.947	1.407	1.015	1.20083	0.511524	nosig	MAM domain-containing protein 2 OS=Homo sapiens OX=9606 GN=MAMDC2 PE=1 SV=3	MAMDC2
Q7Z3B1	1.413	1.142	1.272	1.103	0.962	1.103	1.046	1.128	1.06	1.436	1.103	0.914	1.011	1.139	1.529	1.173	0.895	2.075	1.597	0.972	1.257	0.897	1.012	0.723	1.175	1.054	1.325	0.96	0.822	1.001	0.970167	0.68768	nosig	Neuronal growth regulator 1 OS=Homo sapiens OX=9606 GN=NEGR1 PE=1 SV=3	NEGR1
Q7Z794	5.322	1.329	1.012	2.065	1.774	0	0	0	0	1.209	0.763	0	0.665	1.179	1.591	1.122	0.587	0	0.719	0	0	0	0	0.916	0.686	0.628	0.556	0.583	1.012	0	0.432971	0.200935	nosig	Keratin, type II cytoskeletal 1b OS=Homo sapiens OX=9606 GN=KRT77 PE=1 SV=3	KRT77
Q7Z7G0	0.928	0.946	0.706	1.074	1.15	0.768	0.734	0.517	0.771	1.071	1.124	0.769	0.745	0.716	0.843	0.544	1.313	2.973	0.664	1.755	0.831	1.418	1.066	1.17	1.742	1.459	1.041	1.031	1.308	1.222	1.36953	0.0267641	up	Target of Nesh-SH3 OS=Homo sapiens OX=9606 GN=ABI3BP PE=1 SV=1	ABI3BP
Q7Z7M0	0.86	1.204	1.139	1.37	1.207	1.233	1.186	1.491	1.209	1.188	1.117	1.128	1.001	1.285	0.744	1.005	1.342	1.009	1.223	1.661	1.018	1.156	0.98	1.025	1.191	1.096	0.987	0.937	1.153	1.203	0.920865	0.161804	nosig	Multiple epidermal growth factor-like domains protein 8 OS=Homo sapiens OX=9606 GN=MEGF8 PE=1 SV=2	MEGF8
Q7Z7M8	0.161	0.316	0.333	0	0.36	0.224	0.597	0.707	0.576	0.054	0.467	1.969	3.059	0.505	0.116	0	0.559	4.669	0.503	0.145	1.943	0	2.196	1.916	1.514	0.241	0.579	0	4.151	0	3.6857	0.0121475	up	UDP-GlcNAc:betaGal beta-1,3-N-acetylglucosaminyltransferase 8 OS=Homo sapiens OX=9606 GN=B3GNT8 PE=1 SV=1	B3GNT8
Q7Z7M9	0.989	0.921	0.327	0.778	0.977	1.792	1.174	1.332	1.11	1.081	1.706	0.603	0.966	1.545	0.897	1.603	0.993	1.676	1.472	0.914	0.901	1.659	1.496	1.074	1.15	0.463	0.823	1.178	1.371	1.713	1.15461	0.284608	nosig	Polypeptide N-acetylgalactosaminyltransferase 5 OS=Homo sapiens OX=9606 GN=GALNT5 PE=1 SV=1	GALNT5
Q86SF2	6.596	0.716	0.333	1.385	1.137	0.682	0.781	0.708	1.107	1.516	0.754	0.719	0.827	1.32	0.25	1.092	1.533	0.578	1.64	0.871	1.127	1.553	1.132	0.484	0.84	0.778	1.263	1.694	1.395	1.121	0.700856	0.462867	nosig	N-acetylgalactosaminyltransferase 7 OS=Homo sapiens OX=9606 GN=GALNT7 PE=1 SV=1	GALNT7
Q86SQ4	1.08	1.132	1.278	0.531	1.585	1.135	1.142	1.404	1.04	0.5	1.2	1.143	0.871	1.438	1.352	1.584	0.928	1.652	1.012	1.978	0.772	1.012	0.875	1.067	0.817	0.535	0.989	1.23	0.767	1.076	1.02974	0.811313	nosig	Adhesion G-protein coupled receptor G6 OS=Homo sapiens OX=9606 GN=ADGRG6 PE=1 SV=3	ADGRG6
Q86SR1	1.069	1.114	0	0.98	0.793	1.318	0.836	0.929	1.098	1.094	1.022	1.36	1.266	1.177	1.188	1.596	1.089	0	1.917	1.651	1.089	0.506	1.889	0.526	1.175	1.274	1.159	0.936	1.151	1.283	1.25956	0.12822	nosig	Polypeptide N-acetylgalactosaminyltransferase 10 OS=Homo sapiens OX=9606 GN=GALNT10 PE=1 SV=2	GALNT10
Q86TB9	1.537	1.438	1.362	0.912	1.37	1.098	1.21	1.212	1.215	0.98	1.787	1.073	1.446	1.4	0.998	1.122	1.7	1.162	1.557	0.537	1.188	0.335	1.63	0.871	1.429	1.132	1.02	1.309	0.937	1.324	0.971177	0.733459	nosig	Protein PAT1 homolog 1 OS=Homo sapiens OX=9606 GN=PATL1 PE=1 SV=2	PATL1
Q86TY3	0.513	0.646	0	0.828	0.852	0	0.319	0	0	0	1.523	0.438	0.792	0.51	0.938	0	0.923	3.479	0.389	2.049	0.41	0.685	0.749	1.211	1.16	1.22	0	0	0	0.747	2.72688	0.0179467	up	Armadillo-like helical domain-containing protein 4 OS=Homo sapiens OX=9606 GN=ARMH4 PE=1 SV=1	ARMH4
Q86U17	0.497	1.5	0.379	1.077	1.668	0.732	0.419	0.591	0.975	1.302	0.774	1.83	1.086	2.026	1.033	1.461	1.429	0.818	1.175	0.156	2.061	1.654	1.977	1.22	1.696	1.538	1.476	1.406	1.431	0.53	1.46482	0.0327074	up	Serpin A11 OS=Homo sapiens OX=9606 GN=SERPINA11 PE=2 SV=2	SERPINA11
Q86UD1	0.798	1.044	0.809	0.966	1.276	0.748	1.034	0.799	0.992	0.946	1.066	1.817	1.234	1.225	1.417	1.826	1.743	0.513	1.451	0.811	1.59	1.061	1.315	1.73	0.93	1.222	0.995	1.257	1.624	1.114	1.37808	0.000768222	up	Out at first protein homolog OS=Homo sapiens OX=9606 GN=OAF PE=2 SV=1	OAF
Q86UN3	2.706	1.591	1.801	1.264	0.71	1.961	1.092	1.775	1.306	0.339	0.272	0.808	0.343	0.71	0.803	0.743	0.398	1.774	0.294	1.195	0.736	1.165	1.743	0.87	2.028	1.166	0.897	1.805	0.635	1.694	0.690237	0.0855913	nosig	Reticulon-4 receptor-like 2 OS=Homo sapiens OX=9606 GN=RTN4RL2 PE=1 SV=1	RTN4RL2
Q86UX7	0.659	0.682	1.033	0.866	0.516	0.841	0.719	0.727	0.759	0.633	0.716	0.95	0.898	1.134	1.232	0.854	0.739	2.08	1.021	3.159	0.87	1.279	0.817	1.145	0.951	0.699	2.068	0.828	1.033	0.666	1.55609	0.0087256	up	Fermitin family homolog 3 OS=Homo sapiens OX=9606 GN=FERMT3 PE=1 SV=1	FERMT3
Q86WI1	1.134	0.837	0.894	1.007	0.762	0.891	0.82	0.646	0.663	1.669	0.784	1.682	0.66	2.268	0.653	0.915	1.813	0.681	1.688	1.163	1.303	0.899	0.931	0.547	1.575	1.941	1.426	2.087	0.949	1.715	1.37724	0.0284101	up	Fibrocystin-L OS=Homo sapiens OX=9606 GN=PKHD1L1 PE=2 SV=2	PKHD1L1
Q86X29	0	0.878	1.161	1.491	0.563	0	1.378	0.941	1.06	1.412	0	1.072	0.338	0.436	4.46	0.985	0.72	1.669	0.661	1.046	1.018	0.752	0.897	0	0	1.001	0.515	0.716	0.716	0.91	1.0081	0.978996	nosig	Lipolysis-stimulated lipoprotein receptor OS=Homo sapiens OX=9606 GN=LSR PE=1 SV=4	LSR
Q86YW5	0.882	1.261	1.42	0.41	1.3	1.45	1.457	2.079	1.401	1.221	1.478	1.688	2.341	1.511	0.331	1.341	1.685	0.001	1.378	0.119	1.4	0.682	1.835	1.933	0.63	1.054	1.218	1.268	1.504	1.563	0.968869	0.836887	nosig	Trem-like transcript 1 protein OS=Homo sapiens OX=9606 GN=TREML1 PE=1 SV=2	TREML1
Q86YZ3	0.73	0.67	1.239	1.433	0.893	1.614	1.118	1.117	1.11	0.916	0.546	1.071	0.739	0.6	0.739	1.049	0.94	1.328	0.966	0.275	1.341	1.151	1.227	0.705	0.673	7.976	1.113	0.71	0.644	1.041	1.14548	0.675864	nosig	Hornerin OS=Homo sapiens OX=9606 GN=HRNR PE=1 SV=2	HRNR
Q8IUK5	0	0.582	0.391	0.605	0.026	0.684	0.015	1.046	0.263	0	1.687	0	0	0	0.48	0	0	0.798	1.341	0.745	1.171	7.53	0.041	0	0.782	0.024	0	1.868	0.062	1.316	2.47024	0.191507	nosig	Plexin domain-containing protein 1 OS=Homo sapiens OX=9606 GN=PLXDC1 PE=1 SV=2	PLXDC1
Q8IUX7	1.329	1.093	0.01	0	0.642	0	1.021	0.941	1.088	0	0.03	1.418	1.081	0.742	6.189	0.527	0.038	1.334	0.048	1.805	0.839	1.185	0.927	0.782	1.17	1.618	0.165	0.063	0	0.034	1.63251	0.277848	nosig	Adipocyte enhancer-binding protein 1 OS=Homo sapiens OX=9606 GN=AEBP1 PE=1 SV=1	AEBP1
Q8IW45	0.27	0.556	1.736	0.278	2.136	1.832	2.13	2.256	1.694	0.473	0.745	2.054	2.25	1.83	0.075	2.776	0.532	0	1.323	0	0.422	0	2.528	0	0.426	0.432	0.349	1.066	2.353	1.133	0.759449	0.354741	nosig	ATP-dependent (S)-NAD(P)H-hydrate dehydratase OS=Homo sapiens OX=9606 GN=NAXD PE=1 SV=1	NAXD
Q8IWL2	0.933	1.202	1.065	1.51	1.135	1.5	1.12	1.356	1.334	0.819	0.914	0.644	1.401	1.051	1.057	1.31	1.738	1.415	0.776	0.729	1.314	1.95	0.843	1.115	1.332	1.007	0.763	0.902	1.412	1.381	0.962669	0.677866	nosig	Pulmonary surfactant-associated protein A1 OS=Homo sapiens OX=9606 GN=SFTPA1 PE=1 SV=2	SFTPA1
Q8IWV2	1.501	2.03	1.418	1.591	1.61	2.241	1.503	1.476	1.729	1.558	1.204	1.097	1.59	0.697	0.76	1.058	1.438	0.386	1.483	0.154	1.197	0.792	0.905	1.165	1.012	1.181	1.372	1.259	0.976	1.2	0.628144	1.91E-05	down	Contactin-4 OS=Homo sapiens OX=9606 GN=CNTN4 PE=1 SV=1	CNTN4
Q8IXL6	1.581	1.546	0.891	0.872	0.374	0.872	1.802	1.109	0.858	1.391	0.814	1.664	1.153	1.324	0.957	1.637	1.366	0.593	0.621	0.931	1.096	0.69	2.1	1.707	1.317	0.896	0.826	1.476	2.162	1.102	1.08144	0.60047	nosig	Extracellular serine/threonine protein kinase FAM20C OS=Homo sapiens OX=9606 GN=FAM20C PE=1 SV=2	FAM20C
Q8IZ83	1.317	1.825	0.022	0.93	0.061	1.102	0	0.943	0.03	0.104	3.344	0.924	1.495	0.854	1.292	0.085	1.546	0.904	0.102	0.687	0.512	3.424	2.884	0.995	0.96	1.268	0.878	1.177	0.781	2.922	2.13404	0.0278399	up	Aldehyde dehydrogenase family 16 member A1 OS=Homo sapiens OX=9606 GN=ALDH16A1 PE=1 SV=2	ALDH16A1
Q8IZF2	0.807	0.913	0.662	0.866	0.378	0.751	0.382	0.816	1.165	0.396	0.806	1.32	1.822	0.496	1.288	1.621	0.819	1.615	0.923	1.459	1.693	3.391	0.379	0.9	0.771	1.563	0.897	1.255	1.567	0.797	1.77845	0.00264129	up	Adhesion G protein-coupled receptor F5 OS=Homo sapiens OX=9606 GN=ADGRF5 PE=1 SV=3	ADGRF5
Q8IZP9	1.362	1.061	1.545	0.996	1.39	1.113	1.535	1.363	1.561	1.372	1.483	1.092	1.004	1.315	0.935	1.041	1.479	0.623	1.119	0.441	1.179	1.008	1.599	1.09	1.646	1.146	1.162	1.184	1.48	1.223	0.874154	0.0846731	nosig	Adhesion G-protein coupled receptor G2 OS=Homo sapiens OX=9606 GN=ADGRG2 PE=1 SV=2	ADGRG2
Q8N1N4	2.262	0.134	0.91	0.709	0.629	1.753	1.519	0.907	1.09	0.178	0.807	0.776	1.026	0.654	0.4	0.843	0.751	1.407	0.632	0.804	1.624	0.616	1.016	0.737	1.014	9.548	0.768	0.491	0.581	0.57	1.24195	0.622756	nosig	Keratin, type II cytoskeletal 78 OS=Homo sapiens OX=9606 GN=KRT78 PE=1 SV=2	KRT78
Q8N2S1	2.041	1.724	1.294	0.05	1.901	1.232	1.489	1.281	1.784	0.051	1.767	0.74	0.004	1.098	2.63	0.771	1.453	1.081	0.901	0.407	1.022	1.12	1.529	0.728	1.904	1.318	1.365	1.047	0.625	1.226	0.884876	0.573598	nosig	Latent-transforming growth factor beta-binding protein 4 OS=Homo sapiens OX=9606 GN=LTBP4 PE=1 SV=2	LTBP4
Q8N3T6	0.247	0.366	0	0.701	0.223	0	0	0	0	0.247	0.576	0.48	0.454	0.635	0.779	0.656	0.855	4.614	0.516	2.861	0.174	1.973	0.563	0.979	0.58	0.883	0.345	1.001	0.607	0	5.47393	0.00394434	up	Transmembrane protein 132C OS=Homo sapiens OX=9606 GN=TMEM132C PE=2 SV=3	TMEM132C
Q8N6C8	0	1.636	0	1.263	0.246	0.212	0	0.236	3.657	0	0.318	1.487	4.598	0.153	2.921	0.259	0.37	0.598	0.526	0.381	0.228	4.076	0.154	0.249	0.183	0.257	0.24	0.269	0.286	4.669	1.53255	0.459516	nosig	Leukocyte immunoglobulin-like receptor subfamily A member 3 OS=Homo sapiens OX=9606 GN=LILRA3 PE=1 SV=3	LILRA3
Q8N6G6	1.944	0.803	1.062	1.407	1.558	1.472	1.546	1.146	0.843	1.358	1.853	1.072	1.175	1.302	0.561	0.984	1.746	0.773	1	0.143	1.284	0.901	1.207	1.102	2.336	1.772	1.352	1.246	0.86	1.223	0.909202	0.44937	nosig	ADAMTS-like protein 1 OS=Homo sapiens OX=9606 GN=ADAMTSL1 PE=1 SV=4	ADAMTSL1
Q8N8K9	1.828	0.863	1.096	0	1.3	1.063	1.566	1.393	0.998	0.43	1.317	1.603	1.506	0	0.499	0.855	1.976	0	0	0.5	1.625	0.303	1.972	1.841	0.711	1.225	1.113	0.899	1.888	1.914	1.03194	0.885339	nosig	Uncharacterized protein KIAA1958 OS=Homo sapiens OX=9606 GN=KIAA1958 PE=1 SV=1	KIAA1958
Q8NBJ4	0.463	0.739	0.312	0.591	0.492	0.902	0.448	0.658	0.474	1.216	0.456	1.396	0.708	0.963	2.352	1.409	1.166	1.495	1.445	3.593	0.847	0.537	1.218	0.708	0.84	0.553	1.01	0.799	1.688	0.767	1.9023	0.00461195	up	Golgi membrane protein 1 OS=Homo sapiens OX=9606 GN=GOLM1 PE=1 SV=1	GOLM1
Q8NBJ5	1.085	1.719	1.117	0.998	1.518	2.046	1.412	1.343	1.175	1.827	0.953	1.477	1.439	0.571	0.837	1.905	1.157	1.744	0.871	0.997	0.551	0.325	1.004	0.887	1.216	0.736	1.175	1.518	1.138	0.649	0.742626	0.0188118	down	Procollagen galactosyltransferase 1 OS=Homo sapiens OX=9606 GN=COLGALT1 PE=1 SV=1	COLGALT1
Q8NBP7	1.039	2.573	1.434	1.128	0.576	1.02	1.371	1.464	1.538	1.45	1.205	2.3	1.756	1.253	0.319	1.606	2.575	0.01	1.295	0.19	1.116	0.839	2.593	1.522	0.48	0.269	1.301	1.154	0.977	1.537	0.893732	0.541952	nosig	Proprotein convertase subtilisin/kexin type 9 OS=Homo sapiens OX=9606 GN=PCSK9 PE=1 SV=3	PCSK9
Q8NBS9	0.324	0.26	1.276	0.287	0.196	1.303	0.267	0.289	0.266	0.31	0.251	1.428	1.366	2.083	1.729	0.249	0	2.244	0.594	4.113	0.293	0.331	1.122	1.395	0.984	0.52	1.784	0.265	0.72	1.572	2.41136	0.0137859	up	Thioredoxin domain-containing protein 5 OS=Homo sapiens OX=9606 GN=TXNDC5 PE=1 SV=2	TXNDC5
Q8NC51	1.87	1.5	1.386	0.485	0.713	0.97	2.033	1.523	2.57	1.091	1.536	1.508	1.182	1.298	0.866	0	1.53	0	0.703	0.221	1.488	0.635	1.399	1.263	1.035	1.461	1.137	0.858	1.534	1.327	0.74185	0.133135	nosig	Plasminogen activator inhibitor 1 RNA-binding protein OS=Homo sapiens OX=9606 GN=SERBP1 PE=1 SV=2	SERBP1
Q8NCC3	0.268	1.203	0.262	0.478	0.543	0.259	0.113	0.39	0.138	0.181	0.278	0.367	0.206	1.407	0.718	0.819	0.735	0.877	0.542	0.739	1.176	0.386	1.873	1.524	2.259	0.549	0.131	2.638	0.568	13.953	4.13885	0.0904251	nosig	Phospholipase A2 group XV OS=Homo sapiens OX=9606 GN=PLA2G15 PE=1 SV=2	PLA2G15
Q8NDA2	0.143	0.169	0.296	0	0.317	0.149	0.941	0.22	0.26	0	1.158	0.057	0.346	0.824	0.593	0	0.615	3.754	0.13	2.202	0.961	5.406	0.5	1.89	0.654	0.281	0.261	1.719	1.278	0.19	4.57295	0.00977236	up	Hemicentin-2 OS=Homo sapiens OX=9606 GN=HMCN2 PE=2 SV=3	HMCN2
Q8NFL0	0.415	0.755	0	0.942	0.362	0.682	0	0.329	0	0.349	0.88	1.05	1.072	0.362	2.283	1.5	0.694	1.362	0.492	3.504	0.271	2.413	0	0.494	1.087	0.455	0.45	0.755	1.174	0.447	2.7054	0.00568726	up	UDP-GlcNAc:betaGal beta-1,3-N-acetylglucosaminyltransferase 7 OS=Homo sapiens OX=9606 GN=B3GNT7 PE=1 SV=1	B3GNT7
Q8NFY4	0.439	0.735	0.626	0	1.011	0.482	0.913	0.697	0.897	0	1.166	0.942	0	1.039	1.024	1.024	0.921	2.777	0.802	1.941	0.621	1.625	0.854	0	1.086	1.154	1.096	1.005	1.196	0.855	1.82138	0.0108934	up	Semaphorin-6D OS=Homo sapiens OX=9606 GN=SEMA6D PE=1 SV=1	SEMA6D
Q8NHP8	0	0.172	0	0.136	0.215	0.435	0.375	0.474	0.098	0.061	1.241	0.471	0.875	0.68	0.351	0.279	0.396	0.017	0.571	0.405	0.795	14.342	0.704	0.457	1.008	1.939	0.255	0.492	0.953	0.204	6.72304	0.121332	nosig	Putative phospholipase B-like 2 OS=Homo sapiens OX=9606 GN=PLBD2 PE=1 SV=2	PLBD2
Q8NI99	1.804	1.462	0.984	0.714	1.218	1.433	1.389	1.065	1.124	0.946	1.271	1.598	1.386	0.948	1.309	1.063	1.7	0.322	1.36	0.59	1.22	0.819	1.259	1.13	1.584	0.925	1.617	0.889	1.721	1.541	0.998929	0.99217	nosig	Angiopoietin-related protein 6 OS=Homo sapiens OX=9606 GN=ANGPTL6 PE=1 SV=1	ANGPTL6
Q8TAQ9	1.731	1.933	1.276	1.417	1.106	2.163	1.409	0.833	1.353	1.38	1.435	0.766	1.418	1.054	0.883	1.045	1.211	0.688	1.228	0.4	1.12	0	1.313	1.07	1.692	1.103	1.081	1.355	1.043	1.42	0.730258	0.0174011	down	SUN domain-containing protein 3 OS=Homo sapiens OX=9606 GN=SUN3 PE=1 SV=4	SUN3
Q8TB96	1.028	2.753	2.084	0.686	0.415	3.159	0.897	0.828	0.903	1.841	0.267	0.436	3.539	0.524	1.413	0.928	0.608	0.694	2.47	0.627	0.255	1.969	1.607	0.394	0.407	0.624	2.265	1.318	0.413	0.634	0.732904	0.291836	nosig	T-cell immunomodulatory protein OS=Homo sapiens OX=9606 GN=ITFG1 PE=1 SV=1	ITFG1
Q8TD55	0.78	0	0	0.668	0	0	0	0.612	0.849	0.56	0	1.459	0	0	4.434	0.695	0.737	0.187	1.002	1.609	0.49	0.789	0	0.621	0	0.538	0.495	0	0	0	1.88181	0.243782	nosig	Pleckstrin homology domain-containing family O member 2 OS=Homo sapiens OX=9606 GN=PLEKHO2 PE=1 SV=1	PLEKHO2
Q8TDL5	0.746	1.672	0.875	2.375	1.591	1.302	0.923	1.137	0.83	1.316	1.851	0.325	1.908	0.575	0.753	0.572	4.573	0	0.935	0	1.812	0	0.551	0.49	2.576	1.023	0.925	1.561	0.864	0.585	0.856858	0.531682	nosig	BPI fold-containing family B member 1 OS=Homo sapiens OX=9606 GN=BPIFB1 PE=1 SV=1	BPIFB1
Q8TDY8	1.075	0.554	0.767	1.12	1.22	0.513	0.474	0.51	1.065	0.403	0.563	0.857	0.877	0.552	0.43	0.691	1.231	5	0.505	1.423	1.531	2.13	0.728	1.393	0.668	0.787	0.549	1.077	1.815	0.633	1.52188	0.118688	nosig	Immunoglobulin superfamily DCC subclass member 4 OS=Homo sapiens OX=9606 GN=IGDCC4 PE=1 SV=1	IGDCC4
Q8TER0	0.686	1.029	0.326	1.143	1.109	0.435	0.546	0.847	0.716	1.109	1.434	0.78	0.734	1.788	0.61	1.474	1.459	2.667	0.544	1.238	0.617	0.649	1.651	1.254	1.301	2.171	1.327	1.067	1.468	1.441	1.61553	0.00378786	up	Sushi, nidogen and EGF-like domain-containing protein 1 OS=Homo sapiens OX=9606 GN=SNED1 PE=2 SV=2	SNED1
Q8TF66	0.423	2.008	0.505	0	0.382	0.437	0.467	0.363	0.4	0	5.245	0	0	0.606	2.781	0	0	0	0	0	0	0.362	0.557	0.728	0.505	0.37	0	5.594	0.478	0.429	1.77081	0.361602	nosig	Leucine-rich repeat-containing protein 15 OS=Homo sapiens OX=9606 GN=LRRC15 PE=2 SV=2	LRRC15
Q8WUA8	1.043	3.332	0.874	1.743	0	0.615	0.809	1.335	0	1.603	0.786	0.399	0.353	0.789	0.941	0	0	0.89	0.745	0.797	0.528	1.288	0.783	0.606	1.416	1.228	1.176	2.049	2.921	1.231	0.833451	0.589072	nosig	Tsukushin OS=Homo sapiens OX=9606 GN=TSKU PE=2 SV=3	TSKU
Q8WUJ3	1.589	1.755	1.473	1.357	1.926	1.218	1.777	1.508	1.859	1.463	1.164	1.051	1.221	0.987	0.781	1.121	1.075	0.867	1.029	0.411	1.117	0.979	1.314	0.995	1.413	1.063	0.908	0.927	1.007	1.415	0.654474	7.70E-06	down	Cell migration-inducing and hyaluronan-binding protein OS=Homo sapiens OX=9606 GN=CEMIP PE=1 SV=2	CEMIP
Q8WUM4	0	0	0	0.672	0	0.66	0.887	1.117	1.611	0.635	0.176	1.017	0	0	0.999	1.413	0	2.565	0.924	1.628	0.528	0	0	0.271	0	1.046	1.452	0.698	0	0.916	1.22116	0.609394	nosig	Programmed cell death 6-interacting protein OS=Homo sapiens OX=9606 GN=PDCD6IP PE=1 SV=1	PDCD6IP
Q8WVQ1	0.46	0.752	0.6	0.677	0.61	0.821	0.428	0.826	0.82	0	0.713	1.474	0.505	0.862	0.865	0.661	1.953	2.73	0.718	1.542	3.826	0	0.839	2.353	0	1.671	0.538	0.631	0.619	0.731	1.93785	0.0214015	up	Soluble calcium-activated nucleotidase 1 OS=Homo sapiens OX=9606 GN=CANT1 PE=1 SV=1	CANT1
Q8WWA0	0.586	0.969	0.064	0.639	0.968	0.889	0.973	0.989	0.99	0.817	1.05	0.924	1.08	0.197	1.577	0.854	0.88	5.194	1.083	0.796	0.811	1.603	1.166	0.962	1.08	0.896	0.864	0.914	1.107	0.966	1.52232	0.096861	nosig	Intelectin-1 OS=Homo sapiens OX=9606 GN=ITLN1 PE=1 SV=1	ITLN1
Q8WWQ8	1.816	1.732	0.636	1.132	0	1.443	0	0	0	1.296	1.606	1.066	0.511	0	0.742	1.691	0	0	1.099	0	2	0.662	0	1.27	1.673	0	0.946	0	0	1.04	0.88802	0.757527	nosig	Stabilin-2 OS=Homo sapiens OX=9606 GN=STAB2 PE=1 SV=3	STAB2
Q8WWZ8	0.785	0.466	1.491	1.695	0.607	0.632	0.152	0.686	0.589	0.372	0.818	1.644	0.848	1.044	3.829	0.815	0.892	1.461	2.157	2.753	0.588	0.638	0.45	0.581	0.707	0.626	0.457	0.566	1.802	0.644	1.55987	0.104856	nosig	Oncoprotein-induced transcript 3 protein OS=Homo sapiens OX=9606 GN=OIT3 PE=1 SV=2	OIT3
Q8WXD2	0	0	0.47	1.186	1.2	0.499	0.755	0.732	0.459	1.037	0.883	0.946	0.761	0.784	1.746	0	0.953	2.405	1.136	1.093	1.438	1.679	0.91	1.158	1.459	0.953	1.542	1.125	1.176	0.642	1.79781	0.00933837	up	Secretogranin-3 OS=Homo sapiens OX=9606 GN=SCG3 PE=1 SV=3	SCG3
Q8WZ42	6.177	1.015	0.604	0.931	1.02	0.739	0.541	0.528	1.05	1.546	0.974	0.567	1.028	0.671	1.102	0.404	0.583	2.086	0.734	0.663	1.29	1.122	5.273	0.856	0.579	0.694	0.537	0.601	0.949	0.509	0.749841	0.557764	nosig	Titin OS=Homo sapiens OX=9606 GN=TTN PE=1 SV=4	TTN
Q8WZ75	0.962	0.502	0.512	0.781	0.373	0.854	0.483	0.678	0.877	0.598	0.807	0.74	1.392	0.343	1.033	1.921	0.498	2.593	0.732	2.134	2.315	2.968	0.934	0.84	0.752	0.976	0.445	1.572	0.896	0.609	1.85045	0.00515574	up	Roundabout homolog 4 OS=Homo sapiens OX=9606 GN=ROBO4 PE=1 SV=1	ROBO4
Q8WZA0	1.136	0.758	1.357	1.442	0.451	0.966	0.894	1.033	0.669	1.032	0.455	1.929	0.599	0.657	0.729	1.352	0.598	0.582	0.519	3.238	0.899	2.273	0.695	1.636	0.488	0.525	1.805	1.167	0.619	0.864	1.11055	0.579355	nosig	Protein LZIC OS=Homo sapiens OX=9606 GN=LZIC PE=1 SV=1	LZIC
Q8WZA1	1.968	0.671	0	1.922	0.852	1.547	1.56	0.798	3.203	0.798	1.028	0	0.146	0	0.467	1.186	2.553	1.403	0.185	1.265	1.827	1.275	0	0.765	0.14	0.5	0.561	0.234	1.672	1.47	0.626061	0.150913	nosig	Protein O-linked-mannose beta-1,2-N-acetylglucosaminyltransferase 1 OS=Homo sapiens OX=9606 GN=POMGNT1 PE=1 SV=2	POMGNT1
Q92484	0.304	0.954	0.526	1.005	0.761	0.324	0.649	0.562	0.77	0.713	1.581	1.917	0.796	1.908	1.961	0.765	1.555	1.27	0.93	1.312	2.148	2.765	0.883	0.732	0.453	1.657	0.539	1.432	0.832	0.896	2.00457	0.000248809	up	Acid sphingomyelinase-like phosphodiesterase 3a OS=Homo sapiens OX=9606 GN=SMPDL3A PE=1 SV=2	SMPDL3A
Q92496	2.011	1.435	1.169	0.507	0.693	0.916	0.886	0.699	1.313	1.741	1.736	1.193	0.357	0.737	0.713	3.021	1.327	0.194	1.151	0.086	0.586	1.024	2.139	1.079	1.854	3.761	1.69	0.834	1.024	1.331	1.13619	0.548123	nosig	Complement factor H-related protein 4 OS=Homo sapiens OX=9606 GN=CFHR4 PE=1 SV=3	CFHR4
Q92520	0.335	0.87	0.975	0.802	0.918	0.495	0.962	0.93	0.732	0.7	0.57	0.911	0.607	0.687	1.393	0.769	0.652	2.346	0.788	2.179	1.073	2.283	1.367	1.552	1.815	0.5	0.443	0.76	1.87	1.251	1.54269	0.0123257	up	Protein FAM3C OS=Homo sapiens OX=9606 GN=FAM3C PE=1 SV=1	FAM3C
Q92626	0.86	1.283	1.08	0.96	1.135	1.048	1.234	0.86	1.161	0.521	0.895	1.906	0.825	0.978	3.258	0.791	0.907	1.99	1.251	2.485	0.677	1.023	0.416	0.588	0.361	0.453	0.303	0.558	0.885	0.655	1.04541	0.807271	nosig	Peroxidasin homolog OS=Homo sapiens OX=9606 GN=PXDN PE=1 SV=2	PXDN
Q92673	1.793	0.878	0.765	1.902	2.655	0.707	0.835	0.446	0.707	0.9	1.514	1.146	0.791	1.364	1.088	0.626	1.287	0.713	0.453	1.338	1.764	1.594	0.902	1.524	1.016	0.932	0.954	1.219	1.21	1.458	0.987789	0.953461	nosig	Sortilin-related receptor OS=Homo sapiens OX=9606 GN=SORL1 PE=1 SV=2	SORL1
Q92692	0	0	0.236	0	0	0	0.353	0.474	0.462	0.156	0.148	0.371	0	0.183	3.19	0	0.346	1.809	0.794	3.857	1.49	0.745	0.284	1.447	0.436	0	0.17	0.279	0.291	0	4.71148	0.0203538	up	Nectin-2 OS=Homo sapiens OX=9606 GN=NECTIN2 PE=1 SV=1	NECTIN2
Q92743	1.336	1.285	1.134	0.201	1.119	1.061	1.69	1.365	1.029	1.719	1.459	1.607	1.55	1.21	1.154	1.483	1.492	0.436	2.383	0.306	1.271	0.556	0.732	1.263	1.346	1.219	1.185	1.562	1.427	1.216	1.041	0.776119	nosig	Serine protease HTRA1 OS=Homo sapiens OX=9606 GN=HTRA1 PE=1 SV=1	HTRA1
Q92752	0.9	1.252	1.797	0.652	0	1.776	1.695	1.661	1.618	1.423	1.972	1.609	1.346	0.906	0.574	0	1.273	0	1.215	0	0.704	0.903	1.168	0.767	1.329	2.089	0	0.899	0.823	1.445	0.744559	0.178003	nosig	Tenascin-R OS=Homo sapiens OX=9606 GN=TNR PE=1 SV=3	TNR
Q92764	0.78	0.673	0.828	0.726	0.559	1.205	0.963	0.752	0.985	0.438	6.555	0.375	0.717	0.413	8.329	1.33	0.528	1.004	0.525	0.293	0.662	0.568	0.296	0.473	0.783	0.396	0.452	0.74	0.257	0.802	1.61196	0.329939	nosig	Keratin, type I cuticular Ha5 OS=Homo sapiens OX=9606 GN=KRT35 PE=1 SV=5	KRT35
Q92820	0.55	0.889	0.867	0.753	1.141	0.79	1.097	1.029	0.984	0.827	1.381	1.542	1.479	1.624	1.631	1.667	1.504	0.845	1.038	1.082	1.208	0.666	2.244	0.916	1.468	1.129	1.186	1.276	1.274	0.849	1.45676	0.000307713	up	Gamma-glutamyl hydrolase OS=Homo sapiens OX=9606 GN=GGH PE=1 SV=2	GGH
Q92835	2.239	1.917	1.655	1.524	2.499	1.575	1.551	1.814	1.269	1.667	1.577	0.783	1.222	0.726	0.933	0.437	1.274	1.147	1.304	0.428	0.639	1.103	0.979	0.733	1.51	0.855	0.831	0.682	0.951	0.866	0.535855	1.60E-05	down	Phosphatidylinositol 3,4,5-trisphosphate 5-phosphatase 1 OS=Homo sapiens OX=9606 GN=INPP5D PE=1 SV=2	INPP5D
Q92854	0.729	1.848	1.616	1.446	0.785	0.892	0.566	0.909	0.859	0.828	0.63	1.329	1.259	0.98	0.606	0.751	0.709	2.111	1.768	1.904	0.975	1.258	1.488	1.057	0.401	0.921	0.554	1.03	1.375	1.502	1.07883	0.635088	nosig	Semaphorin-4D OS=Homo sapiens OX=9606 GN=SEMA4D PE=1 SV=1	SEMA4D
Q92859	0.898	0.936	0.741	0.995	0.705	0.565	0.841	0.895	1.011	0.815	1.156	0.831	0.849	1.396	0.669	0.962	0.943	3.417	0.803	2.313	0.968	1.884	0.623	0.893	0.809	0.723	0.601	0.883	1.168	0.816	1.35129	0.076797	nosig	Neogenin OS=Homo sapiens OX=9606 GN=NEO1 PE=1 SV=2	NEO1
Q92896	0.583	0.881	0.844	0.757	1.65	0.947	0.394	0.889	0.315	0.503	0.305	2.038	0.994	9.016	1.825	0.895	0.959	1.058	1.415	0.62	0.934	0.605	0.312	0.789	0.61	0.574	1.092	0.584	0.952	1.363	1.73515	0.200956	nosig	Golgi apparatus protein 1 OS=Homo sapiens OX=9606 GN=GLG1 PE=1 SV=2	GLG1
Q92954	1.306	2.188	1.404	1.019	1.012	1.735	1.684	1.453	1.549	1.337	1.127	1.743	1.15	1.32	1.361	1.23	1.265	1.423	0.945	0.717	0.693	0.73	0.837	0.673	1.009	0.926	0.556	0.98	1.39	0.965	0.71628	0.00553843	down	Proteoglycan 4 OS=Homo sapiens OX=9606 GN=PRG4 PE=1 SV=3	PRG4
Q93063	0.908	0	1.073	0.184	0.322	0.485	0.435	0.975	1.571	0.279	1.241	1.423	1.471	1.626	2.343	0.478	1.226	1.867	1.291	1.441	1.088	1.399	0.875	0.924	0.708	1.281	0.678	1.191	1.361	1.37	2.0284	0.00274671	up	Exostosin-2 OS=Homo sapiens OX=9606 GN=EXT2 PE=1 SV=1	EXT2
Q93088	0.902	0.444	0.712	1.108	6.409	1.014	0.613	0.871	0.978	1.021	0.91	0.778	0.589	3.36	2.41	0.461	0.957	1.586	0.761	0.218	0.844	0.49	0.851	1.276	0.686	0.661	0.907	2.341	0.675	0.644	0.760553	0.577246	nosig	Betaine--homocysteine S-methyltransferase 1 OS=Homo sapiens OX=9606 GN=BHMT PE=1 SV=2	BHMT
Q969T9	0.842	0	0.757	0.703	0	0.464	0.356	0	0.401	0.398	0.74	0.628	0.465	1.25	1.668	0.508	1.235	2.009	0.626	2.263	0.547	1.545	1.454	2.04	1.653	0.932	1.067	1.161	1.36	0.552	3.02257	3.34E-05	up	WW domain-binding protein 2 OS=Homo sapiens OX=9606 GN=WBP2 PE=1 SV=1	WBP2
Q969Z3	0.763	0.735	0.906	0.793	14.367	0	0	0	0.981	0.805	0.603	0.879	0.967	0.815	0.616	0.737	0.656	0.179	0.761	0.357	0	0	0.628	0.549	0	0.642	0.473	0	0.504	0.73	0.260879	0.329847	nosig	Mitochondrial amidoxime reducing component 2 OS=Homo sapiens OX=9606 GN=MTARC2 PE=1 SV=1	MTARC2
Q96BZ4	1.497	0.883	1.102	0.738	0.826	0.607	1.091	1.184	0.481	0.96	1.455	1.135	1.389	1.115	0	1.317	0.872	1.695	0.838	0.399	0.924	0.799	1.805	1.418	0	1.158	1.951	1.993	1.696	1.942	1.27554	0.125283	nosig	5'-3' exonuclease PLD4 OS=Homo sapiens OX=9606 GN=PLD4 PE=2 SV=2	PLD4
Q96C86	0.429	0.441	0.31	0.294	0.424	0.359	0.297	0.477	0.204	0.18	0.413	0.597	0.48	1.999	8.722	0.544	0.547	1.893	0.344	3.047	0.819	0.478	0.426	0.66	0.427	0.472	1.197	0.489	0.426	0.257	3.54861	0.0554999	nosig	m7GpppX diphosphatase OS=Homo sapiens OX=9606 GN=DCPS PE=1 SV=2	DCPS
Q96CG8	1.329	0.673	1.786	0.312	0.319	0.715	2.185	0.694	2.35	0.588	0.24	0.886	1.442	0	2.648	0.639	0.286	1.375	0.275	1.681	1.867	0	0.895	1.308	0.928	1.263	0.352	1.241	0.93	1.961	0.923066	0.774324	nosig	Collagen triple helix repeat-containing protein 1 OS=Homo sapiens OX=9606 GN=CTHRC1 PE=1 SV=1	CTHRC1
Q96CN7	0.133	3.121	0.135	0	0.59	0.082	0.116	0.134	0.077	3.466	0.09	1.009	0.109	5.287	3.805	1.78	2.492	0	2.723	0.998	0.416	2.108	0.087	0	0.061	0.077	0.672	0.487	0.092	0.11	1.42622	0.539275	nosig	Isochorismatase domain-containing protein 1 OS=Homo sapiens OX=9606 GN=ISOC1 PE=1 SV=3	ISOC1
Q96CX2	0.678	1.021	1.285	0.711	0.712	1.808	0.702	1.093	0.563	1.673	1.702	1.155	1.146	1.081	1.2	1.234	1.586	1.34	1.431	1.015	0.93	1.749	0.836	0.506	1.372	1.046	0.724	1.238	1.9	1.178	1.1892	0.242377	nosig	BTB/POZ domain-containing protein KCTD12 OS=Homo sapiens OX=9606 GN=KCTD12 PE=1 SV=1	KCTD12
Q96FQ6	0	0	1.234	0	0	2.789	1.769	0	1.06	2.951	0	0.376	2.147	0	1.021	0	0	0	0	0.29	0.029	0.048	0	0.771	2.15	1.516	0.678	0.975	0	1.484	0.58579	0.340447	nosig	Protein S100-A16 OS=Homo sapiens OX=9606 GN=S100A16 PE=1 SV=1	S100A16
Q96G03	1.192	0.999	0.947	0	0	1.453	0.899	1.054	0	0	0	0	0	0	0.582	1.051	0.928	0	0.395	1.115	1.153	0.693	0	0.321	0	1.537	4.368	0	0.263	1.484	1.06128	0.892139	nosig	Phosphoglucomutase-2 OS=Homo sapiens OX=9606 GN=PGM2 PE=1 SV=4	PGM2
Q96IY4	1.412	1.454	1.71	1.018	1.913	1.459	1.526	1.434	1.17	1.66	1.083	0.967	1.507	1.297	0.771	0.96	1.697	0.178	1.296	0.302	1.354	0.768	1.493	1.311	1.227	1.254	1.085	1.651	1.178	1.202	0.765146	0.00763996	down	Carboxypeptidase B2 OS=Homo sapiens OX=9606 GN=CPB2 PE=1 SV=2	CPB2
Q96KG7	0	1.371	0	1.191	1.832	0	1.568	1.351	0.079	0.983	1.299	0.175	0	0	1.646	1.304	1.121	1.863	1.276	1.18	0.945	1.378	0.152	0.969	1.399	1.073	0.945	0.873	1.304	0.088	1.13373	0.679107	nosig	Multiple epidermal growth factor-like domains protein 10 OS=Homo sapiens OX=9606 GN=MEGF10 PE=1 SV=1	MEGF10
Q96KN2	1.792	1.918	1.537	1.765	1.178	1.278	2.578	1.678	2.156	1.409	1.52	1.611	1.113	1.598	0.949	0.648	0.605	0.543	0.652	0.3	0.564	0.816	1.509	0.749	1.335	1.078	0.445	1.368	1.66	0.886	0.576928	0.000297951	down	Beta-Ala-His dipeptidase OS=Homo sapiens OX=9606 GN=CNDP1 PE=1 SV=4	CNDP1
Q96L35	0.781	0	0.493	0	0	0	0.782	0.659	0	0.47	0	1.422	0	0	0.877	2.089	0	2.825	1.052	1.358	0.706	0.812	0.902	0	0.671	0.573	0.986	0.792	0.771	0	2.48603	0.0249337	up	Receptor protein-tyrosine kinase OS=Homo sapiens OX=9606 GN=EPHB4 PE=1 SV=1	EPHB4
Q96MK3	0.892	1.024	0.879	0	0.903	0.859	0	0.867	1.153	0.93	1.206	1.32	0	0.87	0.689	2.135	0	0	1.448	0.989	1.546	1.184	1.426	1.088	0	1.569	0.989	1.321	1.934	0.703	1.35986	0.169634	nosig	Pseudokinase FAM20A OS=Homo sapiens OX=9606 GN=FAM20A PE=1 SV=4	FAM20A
Q96P63	0.826	0.704	1.112	0.529	1.107	0.735	1.088	0	1.593	0.514	0	0.941	1.203	0	1.419	1.241	0.725	1.123	0.196	1.404	1.007	0.484	1.026	1.251	0.828	4.925	0.819	0	0	1.21	1.20626	0.539643	nosig	Serpin B12 OS=Homo sapiens OX=9606 GN=SERPINB12 PE=1 SV=1	SERPINB12
Q96PD2	0.777	0.911	0	0.817	1.153	0.631	0	0.77	0.791	0.819	1.172	0.982	1.104	0.953	0.655	1.1	1.049	2.547	0.879	1.543	1.244	2.053	0.982	1.174	1.058	0.879	0.879	0.985	1.549	0.652	1.75731	0.00394072	up	Discoidin, CUB and LCCL domain-containing protein 2 OS=Homo sapiens OX=9606 GN=DCBLD2 PE=1 SV=1	DCBLD2
Q96PD5	1.524	1.833	1.571	1.481	1.538	1.554	1.994	1.48	1.656	1.579	1.304	1.122	1.495	0.923	0.756	1.044	1.686	0.314	1.139	0.157	1.265	0.633	1.203	1.106	1.373	1.197	1.085	1.275	1.06	1.37	0.663387	6.54E-06	down	N-acetylmuramoyl-L-alanine amidase OS=Homo sapiens OX=9606 GN=PGLYRP2 PE=1 SV=1	PGLYRP2
Q96RD9	1.81	1.002	1.623	0.671	1.428	0.69	1.676	1.286	1.167	1.006	0	0.934	0.735	0.586	0.841	1.522	0.435	2.2	0.7	2.097	1.824	0.837	1.204	0.919	0.782	0.591	0.739	0.609	1.416	0.348	0.781576	0.148456	nosig	Fc receptor-like protein 5 OS=Homo sapiens OX=9606 GN=FCRL5 PE=1 SV=3	FCRL5
Q96RW7	0.922	1.462	1.83	1.148	0.736	1.808	1.851	1.372	1.604	1.504	1.657	1.824	1.217	1.047	0.637	0.578	0.977	0.2	1.347	0.319	1.275	1.47	1.164	1.238	1.35	1.898	0.511	0.918	1.684	1.506	0.801328	0.0984558	nosig	Hemicentin-1 OS=Homo sapiens OX=9606 GN=HMCN1 PE=1 SV=2	HMCN1
Q96S66	2.811	2.352	0.993	0	1.304	1.367	1.643	2.084	0	0	0	0.926	1.113	0	0	1.329	0	0	1.201	0.906	1.118	0	0.494	0.567	0.928	0.67	0.408	0	0	0	0.384738	0.0436282	down	Chloride channel CLIC-like protein 1 OS=Homo sapiens OX=9606 GN=CLCC1 PE=1 SV=1	CLCC1
Q96S96	1.047	0.889	1.203	0.059	1.228	1.277	1.216	0.987	0.788	0.589	1.703	1.321	1.901	1.1	0.838	1.585	2.156	0.372	0.984	0.512	1.24	1.223	1.254	1.488	1.308	1.235	1.228	1.162	2.314	2.132	1.45729	0.0166856	up	Phosphatidylethanolamine-binding protein 4 OS=Homo sapiens OX=9606 GN=PEBP4 PE=1 SV=3	PEBP4
Q96TA1	1.609	0	1.43	1.794	0	1.199	0.852	1.332	1.461	0	0.299	0	0.935	0.157	3.579	0.863	0	0.085	0	0.525	0.056	2.019	0	0	2.039	1.129	0.119	0	0	1.034	0.663377	0.303519	nosig	Protein Niban 2 OS=Homo sapiens OX=9606 GN=NIBAN2 PE=1 SV=3	NIBAN2
Q99435	0.243	7.457	0.165	0.533	0.298	0.183	0.189	0.397	0.157	0.259	0.574	0.539	0.275	0.455	0.957	1.014	0.981	3.29	0.56	1.882	0.572	1.23	0.473	5.59	1.215	0.322	0.709	0.574	0.634	0.273	1.11927	0.881395	nosig	Protein kinase C-binding protein NELL2 OS=Homo sapiens OX=9606 GN=NELL2 PE=1 SV=1	NELL2
Q99436	0.412	0.124	0.702	0.314	0.425	0.338	0	0.135	0.149	0.423	0.346	1.629	0.462	5.206	7.546	1.05	0.2	0.758	0.688	1.315	0.599	0.937	0	0.481	0.422	0.647	0.795	0.501	0	0.692	4.01621	0.0415356	up	Proteasome subunit beta type-7 OS=Homo sapiens OX=9606 GN=PSMB7 PE=1 SV=1	PSMB7
Q99459	1.412	1.161	0.889	0.848	1.698	0.792	2.158	0.815	1.742	0.856	0.743	1.269	0.899	0.891	0.68	0.997	0.336	1.629	0.614	2.866	1.632	1.035	0.636	0.961	0.772	1.166	0.334	0.633	0.816	0.988	0.804179	0.236813	nosig	Cell division cycle 5-like protein OS=Homo sapiens OX=9606 GN=CDC5L PE=1 SV=2	CDC5L
Q99536	0	1.295	0	0.847	0.951	0	0	2.067	0.51	2.403	0	0	1.078	0	2.232	1.498	0	0.383	0	0.65	0.448	1.396	0	0	0.648	0.658	1.206	0.971	0	0.931	0.74935	0.531748	nosig	Synaptic vesicle membrane protein VAT-1 homolog OS=Homo sapiens OX=9606 GN=VAT1 PE=1 SV=2	VAT1
Q99542	0.119	0.089	0	0.098	0.246	4.386	0.186	0	0.114	0	0.215	0.244	0.344	0.25	4.656	0.476	0.408	3.009	0.34	2.419	4.173	0.277	0.108	0.213	0.194	0.178	0.101	0.157	3.082	0.12	2.00115	0.347419	nosig	Matrix metalloproteinase-19 OS=Homo sapiens OX=9606 GN=MMP19 PE=1 SV=1	MMP19
Q99650	0.657	1.098	1.101	0.86	1.488	0.831	0.665	1.138	1.166	1.166	0.877	0.982	1.22	0.688	0.993	1.476	0.598	1.596	1.521	2.163	1.178	1.445	1.263	1.1	0.88	0.824	0.931	0.902	1.086	0.91	1.11273	0.333439	nosig	Oncostatin-M-specific receptor subunit beta OS=Homo sapiens OX=9606 GN=OSMR PE=1 SV=1	OSMR
Q99715	1.295	1.097	1.401	0.649	1.396	0.791	1.437	1.53	1.588	1.194	1.214	1.178	1.041	1.195	1.084	1.263	1.324	0.305	0.901	1.075	1.667	1.067	1.178	1.453	0.922	1.545	1.18	1.16	1.261	1.148	0.935571	0.50138	nosig	Collagen alpha-1(XII) chain OS=Homo sapiens OX=9606 GN=COL12A1 PE=1 SV=2	COL12A1
Q99784	0.542	0.965	0.799	1.055	0.88	0.918	0.668	0.765	0.382	0.951	0.714	1.2	1.151	1.119	1.46	1.403	1.297	0.879	0.694	2.142	1.324	1.484	1.332	1.657	1.432	1.179	1.214	0.864	1.349	1.022	1.57199	0.000109023	up	Noelin OS=Homo sapiens OX=9606 GN=OLFM1 PE=1 SV=4	OLFM1
Q99797	1.114	0.835	0.785	1.513	0.941	1.053	0.788	0.908	0.642	1.15	0.949	0	1.155	1.845	4.043	1.111	1.292	0.01	0.651	1.708	0.829	0.003	1.108	1.497	0.948	0.841	2.245	1.471	0.072	0.86	1.16343	0.479914	nosig	Mitochondrial intermediate peptidase OS=Homo sapiens OX=9606 GN=MIPEP PE=1 SV=2	MIPEP
Q99895	0	0.505	0.586	0.778	3.291	0.478	0.822	0	1.681	1.022	0.545	0	2.186	1.129	0.686	0	1.271	0	0.429	1.549	1.641	0.785	1.196	1.562	0.753	1.496	0.825	1.236	1.237	0	1.01091	0.976765	nosig	Chymotrypsin-C OS=Homo sapiens OX=9606 GN=CTRC PE=1 SV=2	CTRC
Q99941	0.905	1.006	0.833	0.343	1	0.667	0.204	0.564	0.365	0.613	1.668	0.772	1.149	1.933	1.627	2.702	1.919	1.173	0.745	1.751	1.928	1.835	1.159	0.597	1.061	1.239	0.876	0.547	0.817	1.086	2.04492	0.000154344	up	Cyclic AMP-dependent transcription factor ATF-6 beta OS=Homo sapiens OX=9606 GN=ATF6B PE=1 SV=2	ATF6B
Q99969	2.06	2.31	0.975	1.191	1.508	1.869	2.19	2.173	2.218	1.305	0.782	1.044	1.228	1.429	0	1.585	1.656	0	1.243	0.189	1.863	0.541	1.031	0.714	0.672	0.822	0.804	0.675	0.913	0.94	0.509326	0.000237139	down	Retinoic acid receptor responder protein 2 OS=Homo sapiens OX=9606 GN=RARRES2 PE=1 SV=1	RARRES2
Q99972	0.837	0.958	1.276	0.574	1.053	1.026	1.321	0.896	0.859	0.8	1.42	0.757	0.784	0.817	0.667	0.752	0.982	1.597	1.323	1.922	1.197	1.059	1.271	1.188	1.126	1.072	0.8	1.679	2.205	1.183	1.23964	0.0575708	nosig	Myocilin OS=Homo sapiens OX=9606 GN=MYOC PE=1 SV=2	MYOC
Q99983	0.832	0.302	0.334	0.551	0.678	0.399	0.419	0.323	0.331	0.269	0.916	0.294	0.634	1.921	1.581	0.667	2.116	2.571	0.938	1.103	0.628	1.176	1.769	2.862	2.275	1.196	1.181	1.713	2.341	0.525	3.20043	1.25E-05	up	Osteomodulin OS=Homo sapiens OX=9606 GN=OMD PE=1 SV=1	OMD
Q99988	0.505	0.572	1.826	1.829	0.547	1.067	0	0	2.017	2.432	0.943	0.176	0	0.946	4.124	0	0	1.594	0.996	0.145	0.51	0	0.943	1.038	0	0	0.629	0.15	0	0.811	0.602362	0.236423	nosig	Growth/differentiation factor 15 OS=Homo sapiens OX=9606 GN=GDF15 PE=1 SV=3	GDF15
Q9BR76	1.328	1.273	1.268	1.521	0.733	1.325	1.375	1.318	1.376	1.725	1.782	1.453	1.028	1.108	0.7	0.437	0.936	0.952	1.427	0.779	0.956	1.522	0.939	0.869	1.447	2.129	0.261	1.269	1.295	1.13	0.846511	0.118331	nosig	Coronin-1B OS=Homo sapiens OX=9606 GN=CORO1B PE=1 SV=1	CORO1B
Q9BRF8	1.812	1.399	0.837	0	0	1.865	0	1.185	0	0.865	1.299	1.195	1.857	0	0.982	0.915	0	0.72	1.239	0.558	0.759	0.886	0.754	1.023	1.268	0	1.302	0.886	1.147	2.486	1.21035	0.552199	nosig	Serine/threonine-protein phosphatase CPPED1 OS=Homo sapiens OX=9606 GN=CPPED1 PE=1 SV=3	CPPED1
Q9BRK3	1.396	1.554	1.213	1.615	1.701	0.997	1.214	1.245	1.668	1.39	0.909	1.382	1.481	1.336	1.006	1.657	1.41	0.63	1.735	0.376	1.014	1.081	1.106	0.901	1.231	1.299	1.353	0.986	0.677	0.985	0.805939	0.0171488	nosig	Matrix remodeling-associated protein 8 OS=Homo sapiens OX=9606 GN=MXRA8 PE=1 SV=1	MXRA8
Q9BS26	1.317	1.205	1.524	1.305	1.019	1.404	1.148	2.425	1.905	1.34	0.8	0.765	1.381	0.995	0.609	1.532	1.647	0.924	2.122	0.804	0.662	1.077	1.179	1.286	0.605	1.138	0.802	1.015	0.938	1.135	0.733827	0.0240632	down	Endoplasmic reticulum resident protein 44 OS=Homo sapiens OX=9606 GN=ERP44 PE=1 SV=1	ERP44
Q9BS40	0.457	0	1.073	0.572	0	1.299	0	0.485	0	0.806	0	0.745	1.402	0.556	2.943	2.79	0.759	1.162	0.579	0.746	0	0	0.409	1.372	0	0.949	1.527	1.172	0	0	1.82342	0.126144	nosig	Latexin OS=Homo sapiens OX=9606 GN=LXN PE=1 SV=2	LXN
Q9BTY2	1.119	1.134	1.127	0.431	0.746	0.851	1.096	0.747	0.999	0.308	1.787	1.589	1.425	1.251	0.955	0.85	1.46	1.776	0.903	0.998	1.177	0.686	1.749	1.662	1.528	1.512	0.98	1.275	1.325	1.203	1.52436	0.00131043	up	Plasma alpha-L-fucosidase OS=Homo sapiens OX=9606 GN=FUCA2 PE=1 SV=2	FUCA2
Q9BUD6	0	0.034	0.074	0.303	0.622	0.463	0	0.092	0.059	0	0.855	1.624	1.019	0.142	5.083	0.971	1.095	0.224	1.096	3.334	1.659	1.33	0.906	0.946	0.091	0.519	0.319	1.027	1.416	0.562	7.35216	0.000782464	up	Spondin-2 OS=Homo sapiens OX=9606 GN=SPON2 PE=1 SV=3	SPON2
Q9BUN1	0.022	2.179	1.597	2.043	2.279	2.211	0	2.309	1.943	3.081	0.071	0.046	0	2.446	0	0.074	1.578	0	0.067	0	0.038	0.052	1.954	0.073	1.695	1.811	0.103	1.521	1.656	1.759	0.423007	0.0147336	down	Protein MENT OS=Homo sapiens OX=9606 GN=MENT PE=1 SV=1	MENT
Q9BWP8	0.592	1.102	0.284	0.577	0.808	0.283	1.078	0.858	0.971	0.773	0.862	1.137	0.52	1.145	2.637	0.866	1.281	2.081	1.105	2.533	0.592	0.732	0.838	1.107	1.169	1.13	0.665	0.73	1.664	1.172	1.63568	0.00796462	up	Collectin-11 OS=Homo sapiens OX=9606 GN=COLEC11 PE=1 SV=1	COLEC11
Q9BXJ0	0	0	0.914	0	1.018	0.864	0	1.023	0	0.467	1.144	0.905	0	0.99	0.945	1.731	1.124	0	0.812	1.233	1.449	1.494	1.025	1.205	0	1.127	0	1.244	1.506	0	2.09216	0.0276512	up	Complement C1q tumor necrosis factor-related protein 5 OS=Homo sapiens OX=9606 GN=C1QTNF5 PE=1 SV=1	C1QTNF5
Q9BXN1	1.016	0.274	0.714	0.546	0.474	0.594	0.877	0.563	0.533	0.528	0.642	1.862	1.749	0.654	1.644	1.062	0.772	1.585	1.565	2.431	1.074	1.939	0.912	0.613	1.174	1.341	0.427	1.294	2.058	0.655	2.07983	8.66E-05	up	Asporin OS=Homo sapiens OX=9606 GN=ASPN PE=1 SV=2	ASPN
Q9BXR6	1.817	1.579	2.022	1.509	1.512	1.664	2.078	1.71	1.982	1.922	1.442	0.729	1.056	0.812	0.596	1.314	0.648	0.46	1.333	0.121	0.938	0.745	1.3	0.943	1.781	1.431	0.85	1.153	1.025	1.31	0.56159	1.37E-07	down	Complement factor H-related protein 5 OS=Homo sapiens OX=9606 GN=CFHR5 PE=1 SV=1	CFHR5
Q9BXX0	0.816	0	0.563	0	0	0.743	0	0	0.673	0.836	0.452	0	0	0	2.02	0	0	1.998	0.463	2.649	1.564	0	0.53	0.344	0.45	0.436	0.561	0.155	0	0	1.60039	0.326525	nosig	EMILIN-2 OS=Homo sapiens OX=9606 GN=EMILIN2 PE=1 SV=3	EMILIN2
Q9BY67	0.524	0.289	0.84	0.614	0.549	0.481	0.391	0.557	0.824	0.351	1.132	0.7	0.8	0.925	1.92	0.94	0.793	2.169	1.126	4.355	0.539	1.356	0.613	1.678	0.515	1.068	0.633	0.467	0.661	0.573	2.11836	0.00800924	up	Cell adhesion molecule 1 OS=Homo sapiens OX=9606 GN=CADM1 PE=1 SV=2	CADM1
Q9BYE9	0.328	0.234	0.6	0.296	0.289	0.361	0.295	0.396	0.316	0.306	0.409	2.715	0.843	0.904	0.929	2.586	0.634	2.259	1.025	4.809	0.417	0.775	0.519	0.762	0.505	0.933	0.512	0.905	1.371	0.838	3.60275	0.00166045	up	Cadherin-related family member 2 OS=Homo sapiens OX=9606 GN=CDHR2 PE=1 SV=2	CDHR2
Q9BYJ0	0	0.557	0.752	0	0	1.138	0	0.787	0.737	0.682	1.758	0	0.744	1.251	0.998	0	0.912	0.238	0.229	0.369	0	1.829	1.564	1.885	0	0	0.889	1.648	4.291	0	1.99925	0.0988583	nosig	Fibroblast growth factor-binding protein 2 OS=Homo sapiens OX=9606 GN=FGFBP2 PE=1 SV=1	FGFBP2
Q9BYX2	1.533	1.629	1.403	0.987	1.016	1.715	1.506	1.542	1.834	0.959	1.318	1.47	1.348	1.284	0.912	1.459	1.483	0.491	1.163	0.277	1.277	0.483	1.32	1.296	1.308	1.265	0.984	1.052	1.529	1.337	0.816199	0.0557064	nosig	TBC1 domain family member 2A OS=Homo sapiens OX=9606 GN=TBC1D2 PE=1 SV=3	TBC1D2
Q9BZJ3	0.194	0.246	1.569	1.557	1.697	1.882	2.298	1.191	0	1.647	0	0.99	0	0.975	1.237	1.822	0.296	0.054	1.48	0.411	1.156	0.484	1.52	0.286	1.514	2.151	0	1.799	1.408	1.94	0.794846	0.413258	nosig	Tryptase delta OS=Homo sapiens OX=9606 GN=TPSD1 PE=2 SV=2	TPSD1
Q9GZM5	0.639	0.695	0.824	0.843	0.693	0.704	0.71	0.561	0.732	0.83	0.756	0.746	0.724	0.74	2.349	0.867	0.9	2.539	1.054	2.343	1.82	1.445	0.928	1.018	1.127	0.961	0.567	1.168	0.96	0.74	1.64237	0.00270804	up	Protein YIPF3 OS=Homo sapiens OX=9606 GN=YIPF3 PE=1 SV=1	YIPF3
Q9GZT8	0	0	0.345	0.318	1.43	0	0.426	0.462	2.286	2.087	0.314	0.373	0.328	1.788	3.729	0.341	0.437	2.722	0.4	2.281	0	1.815	0.433	0.278	0.332	0.388	0.406	0.297	0.874	0.457	1.22335	0.649594	nosig	NIF3-like protein 1 OS=Homo sapiens OX=9606 GN=NIF3L1 PE=1 SV=2	NIF3L1
Q9H2J7	0	0	0.893	1.918	0	2.225	0	0.813	1.603	2.397	0.762	0	0	2.3	1.254	0.868	0	1.171	0.741	0.604	0.724	0	0.783	0.925	0	0.775	0	0.748	0.427	0	0.613362	0.280621	nosig	Sodium-dependent neutral amino acid transporter B(0)AT2 OS=Homo sapiens OX=9606 GN=SLC6A15 PE=1 SV=1	SLC6A15
Q9H4A9	0.641	1.156	0.662	1.181	0.652	0.778	0.128	1.161	1.228	0.61	1.606	0.931	2.769	1.485	0.733	1.356	1.439	1.588	1.335	1.065	2.154	1.796	0.565	1.301	0.927	0.9	1.186	0.856	1.305	0.706	1.58613	0.00676509	up	Dipeptidase 2 OS=Homo sapiens OX=9606 GN=DPEP2 PE=1 SV=3	DPEP2
Q9H4B7	1.418	0.334	1.066	1.237	0.199	1.21	0.216	0.959	0.27	0.744	1.164	1.195	1.195	0.723	0.916	1.558	1.209	2.305	1.112	1.735	1.181	2.014	0.899	1.271	0.275	0.997	1.498	1.447	1.715	0.217	1.60891	0.0229882	up	Tubulin beta-1 chain OS=Homo sapiens OX=9606 GN=TUBB1 PE=1 SV=1	TUBB1
Q9H4G4	1.402	1.342	1.55	0.761	0.962	1.567	1.249	1.366	1.141	1.302	1.432	0.726	0.959	1.148	0.919	0.794	0.916	1.523	1.043	0.708	1.217	1.202	1.209	1.11	1.799	1.179	1.094	1.245	1.524	0.971	0.898513	0.219828	nosig	Golgi-associated plant pathogenesis-related protein 1 OS=Homo sapiens OX=9606 GN=GLIPR2 PE=1 SV=3	GLIPR2
Q9H6S0	1.628	1.721	1.14	1.585	2.044	1.362	1.444	1.26	1.189	1.518	1.445	1.003	1.432	1.584	0.71	1.34	1.369	0.466	1.612	0.192	1.088	0.695	1.426	0.739	1.775	1.002	1.068	1.043	0.893	1.67	0.757236	0.00939065	down	3'-5' RNA helicase YTHDC2 OS=Homo sapiens OX=9606 GN=YTHDC2 PE=1 SV=2	YTHDC2
Q9H8J5	0.544	0.553	0	1.791	0.653	0	0	0.532	0.563	0.685	0.883	0.604	0.807	0.87	1.628	0.79	0.766	3.547	0.962	1.776	1.406	1.145	0.79	0.937	0.869	0.696	0.512	1.15	1.213	0.851	2.08626	0.0160193	up	MANSC domain-containing protein 1 OS=Homo sapiens OX=9606 GN=MANSC1 PE=1 SV=1	MANSC1
Q9H8L6	0	0.659	0.582	0.884	0	0	0	0.745	1.38	0	1.569	0.565	0	0	1.885	0.866	1.547	0.858	0	0.716	2.288	0	0	0	0.529	0	0	1.126	1.551	0	1.58824	0.287417	nosig	Multimerin-2 OS=Homo sapiens OX=9606 GN=MMRN2 PE=1 SV=2	MMRN2
Q9HAT2	1.816	0.621	1.737	0.47	0.707	0.496	1.068	1.7	0.736	0.44	0.877	1.06	0.348	1.358	0.485	0.473	0	4.681	1.415	0.879	0.564	0.603	0.621	0.671	0.309	1.296	0.247	0.489	2.227	3.335	1.12031	0.707259	nosig	Sialate O-acetylesterase OS=Homo sapiens OX=9606 GN=SIAE PE=1 SV=1	SIAE
Q9HAV0	1.87	0.754	0.916	1.461	0	0	0.758	0.865	0.747	1.437	0.447	0	0.742	1.613	1.86	0.661	0.684	1.963	1.558	0.813	1.195	1.534	0.542	1.406	0.617	0.697	0	1.489	1.375	0.766	1.13317	0.615262	nosig	Guanine nucleotide-binding protein subunit beta-4 OS=Homo sapiens OX=9606 GN=GNB4 PE=1 SV=3	GNB4
Q9HBI1	1.135	0.58	2.17	0.961	0.907	0.815	0.291	1.633	1.405	1.004	0	2.2	0.578	0.681	0.131	0.102	0	0.462	0.627	4.525	0.21	1.089	0.256	0.688	0	0.079	3.292	0.109	0.598	0.11	0.721815	0.347774	nosig	Beta-parvin OS=Homo sapiens OX=9606 GN=PARVB PE=1 SV=1	PARVB
Q9HBR0	0.71	0.889	1.865	1.189	1.648	0.448	0.783	1.55	1.468	1.781	0.903	0.47	1.698	0.76	1.687	0.905	0.81	1.658	0.749	1.394	1.324	1.294	0.729	1.138	0.772	0.878	0.797	1.455	1.11	0.914	0.869556	0.380279	nosig	Putative sodium-coupled neutral amino acid transporter 10 OS=Homo sapiens OX=9606 GN=SLC38A10 PE=1 SV=2	SLC38A10
Q9HBW9	1.366	1.974	0	0.174	0	0.338	0	0	0.413	0.218	0.461	0	0.331	0	0.24	0	0	0.801	1.361	1.425	0.246	2.327	0	0	2.449	3.086	0.212	0.339	2.381	1.39	1.90152	0.204023	nosig	Adhesion G protein-coupled receptor L4 OS=Homo sapiens OX=9606 GN=ADGRL4 PE=1 SV=3	ADGRL4
Q9HCB6	1.219	0.731	0.971	1.048	0.717	0.829	1.055	0.927	0.733	1.431	0.605	0.824	0.583	0.092	2.275	0.667	0.794	3.883	1.078	1.802	1.207	1.195	1.075	0.86	0.727	0.965	0.634	0.878	0.796	0.637	1.11671	0.567222	nosig	Spondin-1 OS=Homo sapiens OX=9606 GN=SPON1 PE=1 SV=2	SPON1
Q9HCC0	0.277	1.884	2.259	0.185	1.626	0.651	1.266	1.222	1.202	0.566	1.674	1.373	2.402	0	0.296	0.544	3.853	0.015	1.987	0.306	2.218	0.022	0	2.341	1.125	1.34	1.492	0.809	1.137	0	1.02954	0.919172	nosig	Methylcrotonoyl-CoA carboxylase beta chain, mitochondrial OS=Homo sapiens OX=9606 GN=MCCC2 PE=1 SV=1	MCCC2
Q9HCL0	0.541	0.757	1.778	0.628	2.152	0.489	0.487	0.527	1.081	1.939	1.034	0.434	1.028	0.447	0	1.026	0.869	0.362	0.733	1.205	0.78	2.945	1.889	1.531	2.843	2.468	1.391	0.861	0.774	0.692	1.12304	0.649192	nosig	Protocadherin-18 OS=Homo sapiens OX=9606 GN=PCDH18 PE=1 SV=3	PCDH18
Q9HCN6	1.156	1.476	1.743	1.112	1.558	0.977	1.72	1.225	1.494	1.276	1.117	1.346	2.131	1.562	0.5	1.481	1.028	0.65	1.176	0.599	1.352	0.967	1.406	0.918	1.12	0.84	1.193	1.265	1.15	0.996	0.829766	0.057281	nosig	Platelet glycoprotein VI OS=Homo sapiens OX=9606 GN=GP6 PE=1 SV=4	GP6
Q9HCU0	1.24	0.099	0.522	0.358	0.419	0.415	0.436	0.951	0.663	0.247	0.616	0.486	1.104	0.401	1.515	1.369	0.511	3.186	0.563	3.09	0.724	1.967	0.81	0.802	1.222	0.57	0.658	1.944	1.762	0.755	2.24813	0.00408364	up	Endosialin OS=Homo sapiens OX=9606 GN=CD248 PE=1 SV=1	CD248
Q9HD89	0	0	0	0.233	0.805	0.33	0	0.787	0	0.455	0.256	0.77	0.369	0	0.487	0.301	0	0.973	0.368	4.401	2.275	0	0	1.987	0.279	0.581	0.792	0.245	0.685	0	2.82931	0.0766735	nosig	Resistin OS=Homo sapiens OX=9606 GN=RETN PE=1 SV=1	RETN
Q9NP58	0.877	0.579	0.602	1.304	0.596	0.839	0.449	0.683	0.391	0.806	0.914	0	0.774	1.747	3.786	1.018	1.301	0	0.656	1.721	0.835	0	0.745	1.508	0.955	0.847	2.262	1.482	0	0.77	1.496	0.116061	nosig	ATP-binding cassette sub-family B member 6, mitochondrial OS=Homo sapiens OX=9606 GN=ABCB6 PE=1 SV=1	ABCB6
Q9NPG4	0	0.516	1.884	0.194	0	0.143	0	0.366	0.445	0.227	0.261	1.767	0	0	0	2.377	0.238	0.668	0	0.826	0	0	0	2.141	0	2.535	0	2.482	1.965	1.429	2.21046	0.121812	nosig	Protocadherin-12 OS=Homo sapiens OX=9606 GN=PCDH12 PE=1 SV=1	PCDH12
Q9NPH3	1.11	1.361	1.171	1.63	1.783	0.835	1.639	1.465	1.028	0.92	1.511	0.911	1.119	1.465	0.989	1.024	1.815	0.807	0.852	0.487	1.768	0.725	1.313	1.397	0.988	1.156	1.241	1.149	1.112	1.543	0.902952	0.344215	nosig	Interleukin-1 receptor accessory protein OS=Homo sapiens OX=9606 GN=IL1RAP PE=1 SV=2	IL1RAP
Q9NPR2	0.709	0.583	0.994	0.795	0.502	1.235	0.417	0.912	0.397	0.739	1.016	0.804	1.177	0.865	1.085	1.903	1.231	2.378	1.235	1.479	1.409	1.252	0.515	1.156	1.292	1.498	1.589	0.981	1.695	1.057	1.75868	0.000159495	up	Semaphorin-4B OS=Homo sapiens OX=9606 GN=SEMA4B PE=1 SV=4	SEMA4B
Q9NPY3	0.979	0.82	0.638	1.054	0.728	0.899	0.95	0.522	0.877	1.055	1.306	0.878	0.965	0.848	1.167	1.089	1.013	1.278	0.977	1.69	1.759	2.07	1.066	1.266	1.318	1.03	0.837	1.464	1.562	1.071	1.44649	0.000334209	up	Complement component C1q receptor OS=Homo sapiens OX=9606 GN=CD93 PE=1 SV=3	CD93
Q9NQ38	0.944	1.297	1.364	1.234	0.707	0.904	1.019	1.084	1.293	1.304	0.422	1.401	0.873	0.497	1.457	2.396	0.437	0.79	1.037	1.063	1.057	1.174	1.086	2.011	0.381	0.753	2.431	1.92	1.302	0.902	1.04888	0.726346	nosig	Serine protease inhibitor Kazal-type 5 OS=Homo sapiens OX=9606 GN=SPINK5 PE=1 SV=2	SPINK5
Q9NQ79	1.472	0.988	1.732	1.118	1.346	1.058	0.726	1.257	1.346	1.224	2.027	0.431	1.516	0.719	0.541	0.656	1.508	1.063	1.32	0.372	1.527	1.945	0.986	1.119	1.246	1.02	0.805	2.162	1.702	1.059	0.966985	0.784481	nosig	Cartilage acidic protein 1 OS=Homo sapiens OX=9606 GN=CRTAC1 PE=1 SV=2	CRTAC1
Q9NQW7	1.183	1.778	1.353	1.738	1.53	1.718	1.552	1.642	1.824	1.585	1.316	1.24	1.09	1.193	0.944	0.973	1.287	0.614	1.37	0.199	0.797	0.898	0.917	0.855	1.219	1.202	0.943	1.134	1.543	1.514	0.66805	7.12E-06	down	Xaa-Pro aminopeptidase 1 OS=Homo sapiens OX=9606 GN=XPNPEP1 PE=1 SV=3	XPNPEP1
Q9NR34	1.36	1.343	0.958	0.671	1.215	1.398	1.382	1.118	1.111	0.7	1.271	1.593	1.711	1.121	0.613	1.533	1.316	0.952	1.314	1.157	1.149	0.64	1.691	1.462	1.001	1.409	0.908	1.193	1.173	0.938	1.07254	0.46875	nosig	Mannosyl-oligosaccharide 1,2-alpha-mannosidase IC OS=Homo sapiens OX=9606 GN=MAN1C1 PE=1 SV=1	MAN1C1
Q9NR99	0.095	0.244	0.191	0.336	0	0.13	0	0.258	0	0.238	0.229	0.075	0	0	8.212	0	0.157	2.107	0.095	1.877	0.26	0	0.096	0	0	0	0.066	0.098	0	0	4.44772	0.236443	nosig	Matrix-remodeling-associated protein 5 OS=Homo sapiens OX=9606 GN=MXRA5 PE=1 SV=3	MXRA5
Q9NRN5	1.053	1.219	1.596	0.787	1.398	1.287	1.145	0.952	1.088	1.267	1.098	1.102	1.219	1.031	1.172	1.056	1.613	1.606	0.968	1.37	1.129	1.096	1.088	1.286	0.838	0.886	1.286	0.687	1.106	0.818	0.952129	0.536867	nosig	Olfactomedin-like protein 3 OS=Homo sapiens OX=9606 GN=OLFML3 PE=2 SV=1	OLFML3
Q9NSC7	0	0.241	1.385	0	0.187	0	0.18	0.19	0	0	0	1.581	0.208	0	0.05	1.299	0	0.945	0	2.506	0	0	0.19	0	0	1.241	1.48	0	2.014	1.831	3.05657	0.0630942	nosig	Alpha-N-acetylgalactosaminide alpha-2,6-sialyltransferase 1 OS=Homo sapiens OX=9606 GN=ST6GALNAC1 PE=2 SV=1	ST6GALNAC1
Q9NTU7	0.867	1.149	0.751	1.344	1.64	0.983	0.791	1.026	0.748	1.016	1.102	1.272	1.003	1.118	0.64	0.819	2.108	2.264	1.101	0.759	1.066	1.199	1.853	0.79	1.169	1.231	1.309	1.359	1.097	1.147	1.18303	0.158474	nosig	Cerebellin-4 OS=Homo sapiens OX=9606 GN=CBLN4 PE=1 SV=1	CBLN4
Q9NWV4	0.838	0	1.321	0	0.478	0.82	0	1.108	0	0.565	0	1.029	0	0.628	0.665	1.206	0.733	0	0	2.62	0.766	1.913	0.603	1.762	0	0.594	1.85	0.668	0.468	0.641	1.57368	0.209515	nosig	CXXC motif containing zinc binding protein OS=Homo sapiens OX=9606 GN=CZIB PE=1 SV=1	CZIB
Q9NX62	1.192	1.122	0.948	2.077	0.462	0.752	1.082	0.608	0.663	1.164	2.125	1.029	0.634	1.94	0.926	0	1.68	0.328	1.466	0.558	1.798	2.03	1.381	0.501	0.593	1.674	0.462	1.555	2.503	1.236	1.21246	0.323134	nosig	Golgi-resident adenosine 3',5'-bisphosphate 3'-phosphatase OS=Homo sapiens OX=9606 GN=BPNT2 PE=1 SV=1	BPNT2
Q9NY15	0.901	0.758	0.638	2.419	0.43	1.129	0.718	0.786	0.835	1.115	0.797	0.876	0.745	0.39	1.967	2.128	0.693	2.554	2.035	1.677	0.456	0.646	0.814	0.405	1.029	0.742	0.726	1.12	0.612	2.522	1.17864	0.469269	nosig	Stabilin-1 OS=Homo sapiens OX=9606 GN=STAB1 PE=1 SV=3	STAB1
Q9NY97	0.793	0.61	0.87	1.091	0.908	0.755	0.725	0.716	0.893	0.765	1.054	1.8	1.006	0.866	0.973	1.235	1.268	1.328	1.071	2.113	1.304	1.613	0.877	1.598	0.965	0.989	1.161	0.84	1.57	0.94	1.51188	7.16E-05	up	N-acetyllactosaminide beta-1,3-N-acetylglucosaminyltransferase 2 OS=Homo sapiens OX=9606 GN=B3GNT2 PE=1 SV=2	B3GNT2
Q9NYU2	1.767	1.226	0.202	1.181	0	0.835	0.974	0.121	1.926	0	0.858	1.544	1.558	0.646	2.616	0.308	1.014	0.971	0.879	1.345	2.751	0.663	1.549	0.118	0	0.967	2.082	0.247	0.79	1.028	1.33224	0.346409	nosig	UDP-glucose:glycoprotein glucosyltransferase 1 OS=Homo sapiens OX=9606 GN=UGGT1 PE=1 SV=3	UGGT1
Q9NZ08	1.075	1.41	1.412	1.163	1.141	1.228	1.241	1.217	1.201	1.57	1.125	1.236	1.415	1.125	0.857	1.482	1.286	1.096	1.321	1.1	0.722	1.165	1.284	0.687	1.422	1.239	0.86	1.048	1.007	1.094	0.891571	0.0573752	nosig	Endoplasmic reticulum aminopeptidase 1 OS=Homo sapiens OX=9606 GN=ERAP1 PE=1 SV=3	ERAP1
Q9NZD4	0.448	0.365	0.771	0.498	0.165	0.794	0.415	0.497	0.495	0.474	0.261	0.495	1.02	0.413	9.487	1.577	0.736	0.697	0.322	1.88	0.649	1.109	0.555	0.866	0.336	0.702	1.804	0.515	0.252	1.213	2.52834	0.111312	nosig	Alpha-hemoglobin-stabilizing protein OS=Homo sapiens OX=9606 GN=AHSP PE=1 SV=1	AHSP
Q9NZL9	0.737	0	0.693	0	0	0	0	0.072	0.073	5.85	0.041	0.221	0.124	0.383	2.671	0.182	0.546	1.567	0.191	3.087	1.162	2.901	0.176	0.07	0	0.579	0.866	0.146	0.096	0.04	1.0134	0.987411	nosig	Methionine adenosyltransferase 2 subunit beta OS=Homo sapiens OX=9606 GN=MAT2B PE=1 SV=1	MAT2B
Q9NZN3	0.294	0.384	0.549	0.416	0.352	0.395	0.253	0.723	0.284	0.326	0.203	0.81	2.798	0.459	0.569	0.305	0.269	0.335	0.38	7.906	1.69	1.052	0.234	1.274	0.184	0.298	0.639	0.216	1.183	0.36	2.66147	0.107069	nosig	EH domain-containing protein 3 OS=Homo sapiens OX=9606 GN=EHD3 PE=1 SV=2	EHD3
Q9NZP8	1.4	1.544	1.45	1.114	1.401	1.474	0.883	1.472	1.528	1.494	0.912	1.357	1.107	0.822	1.037	1.33	1.947	1.166	0.513	0.613	1.675	0.581	1.177	1.2	1.308	0.866	1.556	1.228	0.893	0.98	0.809157	0.0192259	nosig	Complement C1r subcomponent-like protein OS=Homo sapiens OX=9606 GN=C1RL PE=1 SV=2	C1RL
Q9NZT1	0.376	0.851	0.317	0.959	0	0.24	1.247	0.531	1.32	1.69	0.568	0.881	0.604	0	1.301	0.805	0	1.833	1.008	0.412	0.469	0.279	0	0.263	0	8.951	1.504	0	0.665	0.306	1.31782	0.61397	nosig	Calmodulin-like protein 5 OS=Homo sapiens OX=9606 GN=CALML5 PE=1 SV=2	CALML5
Q9NZU0	0	0	3.952	0	1.82	1.313	1.704	1.765	2.244	0	1.733	0.448	0	1.065	0.478	0.768	2.459	0	1.088	0.553	0.464	0	0	1.069	0	0.309	1.156	0.209	0.404	1.349	0.529458	0.196078	nosig	Leucine-rich repeat transmembrane protein FLRT3 OS=Homo sapiens OX=9606 GN=FLRT3 PE=1 SV=1	FLRT3
Q9P0L0	0.478	3.194	3.126	0.517	2.648	1.706	3.721	3.133	3.421	1.35	2.623	0.183	1.538	0	0.594	0.141	0.293	0	0.137	0.233	0.097	0.517	0	0.839	0.562	0	0.574	0.458	0	0.699	0.203658	0.000772361	down	Vesicle-associated membrane protein-associated protein A OS=Homo sapiens OX=9606 GN=VAPA PE=1 SV=3	VAPA
Q9P121	1.043	1	1.265	1.112	1.192	0.975	0.911	1.115	0.819	1.154	1.13	1.233	1.287	0.981	1.734	1.526	1.255	1.315	1.158	0.859	1.204	0.94	1.045	1.408	1.194	1.237	1.332	1.423	0.887	0.993	1.14023	0.031711	nosig	Neurotrimin OS=Homo sapiens OX=9606 GN=NTM PE=1 SV=1	NTM
Q9P232	1.891	0.803	1.729	0.517	0.874	1.723	2.258	1.179	0.869	0.412	1.088	1.076	1.133	0.483	0.778	1.251	1.265	1.586	0.89	2.457	0.527	1.036	0.708	1.348	0.904	0.908	0.197	0.531	1.021	1.631	0.849368	0.432277	nosig	Contactin-3 OS=Homo sapiens OX=9606 GN=CNTN3 PE=1 SV=3	CNTN3
Q9P244	0.091	0	0.317	0.349	0.666	0	0	0.31	0	0.274	0	0.949	1.302	0.092	1.26	1.631	0	1.61	0.323	3.56	0.952	0.792	0	0.882	0.47	0	0	0.645	0	0	3.60438	0.0197468	up	Leucine-rich repeat and fibronectin type III domain-containing protein 1 OS=Homo sapiens OX=9606 GN=LRFN1 PE=1 SV=2	LRFN1
Q9P2B2	0.747	0.999	1.84	0	1.184	1.015	1.993	1.316	0.868	1.085	0.366	1.695	0	2.047	1.335	0	0.691	1.27	0.646	0	0.757	1.761	0	1.264	0.898	0.585	2.055	1.023	1.722	0.316	0.834208	0.445223	nosig	Prostaglandin F2 receptor negative regulator OS=Homo sapiens OX=9606 GN=PTGFRN PE=1 SV=2	PTGFRN
Q9P2X0	0	1.758	2.134	1.042	1.989	0	2.415	1.113	2.56	0	0	0.585	1.366	1.321	0	0.351	1.254	0	0	0.183	0	0.911	1.864	0.239	0	0.872	0.717	0	1.643	0	0.434479	0.0578606	nosig	Dolichol-phosphate mannosyltransferase subunit 3 OS=Homo sapiens OX=9606 GN=DPM3 PE=1 SV=2	DPM3
Q9UBG0	0.926	1.07	0.466	1.428	0.982	0.727	1.235	0.764	0.675	1.582	0.875	0.831	0.668	1.405	0.506	0.953	1.005	3.066	0.547	1.605	0.687	1.821	1.34	0.757	1.081	1.234	0.923	1.231	1.43	0.754	1.15266	0.384868	nosig	C-type mannose receptor 2 OS=Homo sapiens OX=9606 GN=MRC2 PE=1 SV=2	MRC2
Q9UBQ6	0.945	0.997	0.728	0.796	0.653	0.722	0.927	0.628	0.459	0.894	0.889	1.215	0.71	1.256	0.491	0.42	1.161	1.011	0.655	1.198	1.665	1.927	1.418	1.76	2.035	1.209	1.288	2.022	2.251	1.904	1.70893	0.000331711	up	Exostosin-like 2 OS=Homo sapiens OX=9606 GN=EXTL2 PE=1 SV=1	EXTL2
Q9UBQ7	0.649	2.392	1.888	1.678	2.283	1.107	2.103	1.701	2.163	1.513	1.059	1.126	1.13	1.394	0	0	1.36	0	0.763	0.102	0.838	0.494	0.988	0.919	0	1.082	1.002	1.022	1.044	1.694	0.458231	0.000280571	down	Glyoxylate reductase/hydroxypyruvate reductase OS=Homo sapiens OX=9606 GN=GRHPR PE=1 SV=1	GRHPR
Q9UBR2	0.395	0.884	0.16	1.049	0.679	0.657	0.694	0.828	0.612	0.226	1.492	1.611	1.183	1.544	2.075	1.188	1.945	1.695	1.303	1.461	1.376	1.496	1.878	1.207	0.899	0.974	1.116	0.809	1.045	0.5	2.16664	6.77E-06	up	Cathepsin Z OS=Homo sapiens OX=9606 GN=CTSZ PE=1 SV=1	CTSZ
Q9UBX1	0.26	0.393	0.298	1.087	2.025	0	0.351	1.091	0	0.971	2.042	1.649	1.977	1.68	0.831	0.881	0.554	0.3	1.717	0.677	1.961	1.071	1.477	1.345	0.381	3.359	0.298	1.986	1.971	0.348	2.0464	0.0197254	up	Cathepsin F OS=Homo sapiens OX=9606 GN=CTSF PE=1 SV=1	CTSF
Q9UGM5	1.212	1.787	1.06	1.221	1.593	1.532	1.278	1.313	1.822	1.588	1.516	1.282	1.503	1.357	0.603	1.346	1.741	0.407	1.409	0.085	1.195	0.751	1.455	1.089	1.509	1.106	1.201	1.569	0.873	1.203	0.80522	0.0336988	nosig	Fetuin-B OS=Homo sapiens OX=9606 GN=FETUB PE=1 SV=2	FETUB
Q9UGT4	1.245	1.05	1.052	0.812	0	0	0.718	1.269	0	0	0.967	0.677	0.822	0.766	0.868	0.666	0.909	2.154	0.569	2.845	0.892	1.25	0.536	0	0	0.873	0.64	0.643	0.664	0.907	1.43573	0.248799	nosig	Sushi domain-containing protein 2 OS=Homo sapiens OX=9606 GN=SUSD2 PE=1 SV=1	SUSD2
Q9UHG3	1.198	2.28	0.941	0.879	1.579	1.603	1.643	1.685	1.593	1.149	1.001	0.841	1.157	1.341	0.987	0.825	1.831	0.207	1.539	0.208	0.781	0.515	2.019	0.993	1.759	1.177	1.489	1.14	1.475	1.774	0.792405	0.0987692	nosig	Prenylcysteine oxidase 1 OS=Homo sapiens OX=9606 GN=PCYOX1 PE=1 SV=3	PCYOX1
Q9UI43	1.694	1.599	1.487	0.68	0.685	1.633	1.843	1.464	1.802	1.157	1.482	1.406	0.934	1.377	0.979	1.647	1.8	0.344	1.086	0.293	1.219	0.607	1.355	1.337	1.51	1.102	1.013	1.115	1.618	0.936	0.824551	0.148115	nosig	rRNA methyltransferase 2, mitochondrial OS=Homo sapiens OX=9606 GN=MRM2 PE=1 SV=1	MRM2
Q9UIQ6	0.596	0.495	0	1.128	0.651	0	0.554	0.738	0.694	0.858	0.777	0.645	0.373	0.787	2.207	0.709	0.493	4.931	0.916	1.582	0.636	1.716	1.096	0.82	0.545	0.692	0.664	0.892	0.884	0.647	1.92615	0.0446293	up	Leucyl-cystinyl aminopeptidase OS=Homo sapiens OX=9606 GN=LNPEP PE=1 SV=3	LNPEP
Q9UIW2	1.096	1.289	1.114	0.77	1.518	1.018	1.6	1.269	1.84	1.198	1.168	1.222	2.337	0.914	0.598	1.118	1.403	1.364	1.224	0.844	2.878	0.668	1.02	1.105	0.778	0.654	0.821	0.983	1.086	0.819	0.904814	0.451223	nosig	Plexin-A1 OS=Homo sapiens OX=9606 GN=PLXNA1 PE=1 SV=3	PLXNA1
Q9UJ14	1.639	0.498	1.121	0.793	0.783	1.167	1.567	1.561	1.426	0.657	1.846	0.458	0.925	0.644	0.709	0.671	1.012	1.136	0.874	1.045	0.882	2.046	0.869	1.082	1.034	1.819	0.735	1.65	2.201	1.88	1.04879	0.760529	nosig	Glutathione hydrolase 7 OS=Homo sapiens OX=9606 GN=GGT7 PE=1 SV=2	GGT7
Q9UJJ9	1.079	1.021	0.98	1.028	1.195	0.854	0.906	1.043	0.921	1.15	1.143	1.279	1.081	0.949	1.38	1.434	0.967	1.054	1.242	1.85	1.317	1.627	0.977	1.163	0.792	0.31	0.982	1.362	1.477	0.77	1.13766	0.103635	nosig	N-acetylglucosamine-1-phosphotransferase subunit gamma OS=Homo sapiens OX=9606 GN=GNPTG PE=1 SV=1	GNPTG
Q9UK23	0.996	0.671	0.518	1.185	0.908	0.628	0.836	0.676	0.735	0.432	0.838	1.157	1.079	1.469	0.989	1.008	0.7	2.24	0.56	3.618	0.882	1.181	0.638	0.617	1.014	0.59	0.441	0.575	1.476	1.475	1.48629	0.0485111	up	N-acetylglucosamine-1-phosphodiester alpha-N-acetylglucosaminidase OS=Homo sapiens OX=9606 GN=NAGPA PE=1 SV=2	NAGPA
Q9UKU6	0.646	1.69	0.51	0.506	0	0.864	4.05	2.831	1.983	0.692	0.381	1.389	3.35	0.462	0.87	1.43	0.421	0.149	0.581	0.602	0.486	0.708	0.529	0.377	2.347	2.154	0.764	0.645	2.077	2.354	0.801481	0.550528	nosig	Thyrotropin-releasing hormone-degrading ectoenzyme OS=Homo sapiens OX=9606 GN=TRHDE PE=2 SV=1	TRHDE
Q9UKX2	23.273	0.205	0.162	0.224	0.206	0	0	0.222	0.19	0.123	0.234	0.188	0.229	0.349	0.229	0	0.258	0	0.125	0.071	0.186	0.235	0	0	0	0.268	0.166	0.44	0	0	0.0605162	0.343676	nosig	Myosin-2 OS=Homo sapiens OX=9606 GN=MYH2 PE=1 SV=1	MYH2
Q9UKX5	0	1.834	1.024	0.765	0	0.991	0.982	1.259	0	1.034	2.402	0.056	0.854	0.891	0	0	0	1.209	0.579	1.016	0.94	2.914	0.8	0.229	2.484	0.54	0	0.811	1.084	1.293	1.14729	0.672516	nosig	Integrin alpha-11 OS=Homo sapiens OX=9606 GN=ITGA11 PE=1 SV=2	ITGA11
Q9ULC0	0	0.866	0.91	0.886	0	0.858	0	0.87	0.694	0.596	1.461	0.701	0	0.918	0	0	0.982	3.07	0	0.697	1.305	0	0.862	1.559	2.26	0.675	0.7	1.692	0	0.696	1.54736	0.179347	nosig	Endomucin OS=Homo sapiens OX=9606 GN=EMCN PE=1 SV=2	EMCN
Q9ULC6	2.224	1.722	1.793	1.279	1.971	1.257	1.445	2.019	1.919	1.498	1.205	0.8	0.832	0.749	0.958	0.922	0.972	0.585	0.781	0.751	0.8	1.314	1.018	1.287	1.045	1.018	1.191	0.888	0.738	1.288	0.558825	1.90E-05	down	Protein-arginine deiminase type-1 OS=Homo sapiens OX=9606 GN=PADI1 PE=1 SV=2	PADI1
Q9ULI3	0.618	0.625	0.462	1.923	0.654	1.816	0.642	0.681	0.578	1.893	1.242	0.584	1.025	0.698	0.508	1.733	1.505	3.302	1.639	1.34	0.78	0.961	0.688	0.905	1.537	0.741	0.998	1.594	0.919	0.579	1.17661	0.478027	nosig	Protein HEG homolog 1 OS=Homo sapiens OX=9606 GN=HEG1 PE=1 SV=3	HEG1
Q9ULV4	1.784	1.309	0.878	1.845	0.539	2.668	1.572	0.739	0.083	1.818	0	0.029	0.012	0.331	0.862	0.016	0	0.459	0.026	3.655	0	1.9	0.039	0.257	0	0.101	3.33	1.29	0.614	0.125	0.49286	0.0628671	nosig	Coronin-1C OS=Homo sapiens OX=9606 GN=CORO1C PE=1 SV=1	CORO1C
Q9UM47	0.199	0.125	0.158	0.194	0.172	0.114	0.195	0.189	0.149	0.103	1.109	0.201	0.302	0.189	0.261	0.379	0.294	0.586	14.158	0.319	0.358	0.9	0.271	0.302	0.205	0.268	12.103	0.297	0.476	0.282	10.4068	0.104513	nosig	Neurogenic locus notch homolog protein 3 OS=Homo sapiens OX=9606 GN=NOTCH3 PE=1 SV=2	NOTCH3
Q9UMX0	1.63	1.375	0.908	0.723	0.901	0.465	1.028	0.497	0.767	0.351	0.76	1.089	1.364	0.975	0.482	1.148	1.831	2.692	0.316	1.12	1.276	0.861	0.966	1.966	1.347	2.314	1.448	1.352	0.757	1.058	1.45298	0.0418888	up	Ubiquilin-1 OS=Homo sapiens OX=9606 GN=UBQLN1 PE=1 SV=2	UBQLN1
Q9UNN8	0.91	0.779	0.767	0.811	0.852	0.501	1.804	0.42	0.692	0.913	1.22	0.87	0.833	0.697	1.1	0.99	1.256	2.467	1.181	1.898	1.469	1.048	0.82	1.345	1.356	1.124	0.498	1.299	1.21	1.449	1.42798	0.0275814	up	Endothelial protein C receptor OS=Homo sapiens OX=9606 GN=PROCR PE=1 SV=1	PROCR
Q9UNW1	1.157	0.977	0.762	1.079	0.942	1.418	0.964	1.302	0.89	0.865	1.745	1.283	1.847	0.814	1.511	1.538	0.838	0.898	1.341	1.152	1.341	1.439	1.029	1.248	1.189	1.163	0.753	1.406	0.843	0.854	1.16995	0.0786623	nosig	Multiple inositol polyphosphate phosphatase 1 OS=Homo sapiens OX=9606 GN=MINPP1 PE=1 SV=1	MINPP1
Q9UP79	0.484	1.051	0.289	0.933	1.063	1.023	0.617	1.139	0.929	1.106	1.824	0.464	0.532	1.409	0.59	0.867	1.283	1.729	0.415	0.919	0.995	2.832	1.712	1.373	1.661	1.558	0.784	1.511	2.315	0.58	1.46821	0.026541	up	A disintegrin and metalloproteinase with thrombospondin motifs 8 OS=Homo sapiens OX=9606 GN=ADAMTS8 PE=2 SV=2	ADAMTS8
Q9Y240	1.238	1.059	0.834	0.682	0.636	0.871	0.77	0.923	0.714	0.913	1.44	1.231	0.91	1.777	2.288	0.707	1.276	0.614	1.789	1.157	1.052	1.226	1.316	1.282	1.428	1.076	0.888	0.985	1.775	1.503	1.48843	0.000521572	up	C-type lectin domain family 11 member A OS=Homo sapiens OX=9606 GN=CLEC11A PE=1 SV=1	CLEC11A
Q9Y251	0.571	0.843	0.957	1.259	2.681	0.325	2.29	2.216	1.399	0.961	0.539	0.264	0	2.023	0.356	0.214	0.283	1.594	1.765	1.07	0.598	0.916	2.02	0.656	0.181	0.565	0.074	0.573	5.218	1.452	0.753999	0.369899	nosig	Heparanase OS=Homo sapiens OX=9606 GN=HPSE PE=1 SV=2	HPSE
Q9Y266	0	0	0	0.058	0.024	0	0.024	0.02	0.023	0	0.023	0.041	0	0.013	12.912	0	0	0.152	0	0.699	0	0.166	0	0.024	0	0.058	0.096	0.033	0	0.012	47.7483	0.29232	nosig	Nuclear migration protein nudC OS=Homo sapiens OX=9606 GN=NUDC PE=1 SV=1	NUDC
Q9Y2E5	1.137	0.247	1.147	0.358	0	0	1.035	1.33	0.85	0.718	2.328	0.253	0	1.212	0.389	0.264	2.907	0.137	0.381	0.655	1.1	4.201	2.693	0.293	0.323	2.452	1.361	0	2.271	0.114	1.7102	0.135543	nosig	Epididymis-specific alpha-mannosidase OS=Homo sapiens OX=9606 GN=MAN2B2 PE=1 SV=4	MAN2B2
Q9Y2T3	2.325	2.028	0.954	1.481	1.809	2.773	1.196	1.72	1.905	1.002	1.644	0.753	0.842	1.229	0.839	0.803	1.861	0.958	0.693	0.238	0.727	0.681	0.499	1.085	1.705	0.903	0.727	0.694	1.741	1.439	0.583406	0.00398491	down	Guanine deaminase OS=Homo sapiens OX=9606 GN=GDA PE=1 SV=1	GDA
Q9Y3C6	1.846	1.662	1.336	1.43	2.185	1.008	1.097	1.896	1.123	1.573	1.457	0	1.993	0.576	0	0	1.053	0	0.742	0.289	1.624	0	0.982	0.835	0	0.819	0	1.544	0	0	0.393046	5.60E-05	down	Peptidyl-prolyl cis-trans isomerase-like 1 OS=Homo sapiens OX=9606 GN=PPIL1 PE=1 SV=1	PPIL1
Q9Y490	1.068	1.517	1.384	1.447	1.126	1.252	1.164	1.006	1.078	0.988	1.666	1.026	1.067	1.28	0.55	0.949	1.217	0.532	1.646	1.832	1.285	1.247	0.905	0.776	0.16	0.07	2.446	1.287	1.392	0.997	0.928096	0.537629	nosig	Talin-1 OS=Homo sapiens OX=9606 GN=TLN1 PE=1 SV=3	TLN1
Q9Y4C0	1.005	0.932	0.951	1.152	1.494	0.812	0.534	0.99	0.982	1.129	1.615	0.929	1.049	0.974	1.079	1.279	0.632	1.506	0.947	1.433	1.069	2.358	1.484	0.302	0.982	1.251	1.092	1.298	1.418	0.832	1.17869	0.155378	nosig	Neurexin-3 OS=Homo sapiens OX=9606 GN=NRXN3 PE=1 SV=4	NRXN3
Q9Y4D7	2.392	0.245	0	0	0.506	0	0	0.304	0	2.177	0	0.167	0.27	0.194	0.192	0.314	0	3.628	0	3.148	0.241	1.923	0.696	0.504	1.491	0.497	0.159	0.289	0.283	0.219	1.26378	0.695338	nosig	Plexin-D1 OS=Homo sapiens OX=9606 GN=PLXND1 PE=1 SV=3	PLXND1
Q9Y4L1	0.925	1.448	1.027	1.427	0.994	1.014	2.237	1.047	0.93	1.509	1.061	0.948	1.102	0.773	1.184	0.825	1.102	1.909	1.143	1.348	0.874	0.955	1.177	1.238	1.616	0.734	0.734	1.226	1.009	0.673	0.861244	0.256001	nosig	Hypoxia up-regulated protein 1 OS=Homo sapiens OX=9606 GN=HYOU1 PE=1 SV=1	HYOU1
Q9Y5C1	0.721	1.471	1.359	0.925	1.8	1.439	1.003	1.045	1.199	1.266	1.177	1.353	1.237	1.23	0.708	1.71	1.633	0.552	1.704	0.312	1.199	1.209	1.303	1.453	1.556	0.867	1.311	1.296	1.273	1.359	0.999428	0.995701	nosig	Angiopoietin-related protein 3 OS=Homo sapiens OX=9606 GN=ANGPTL3 PE=1 SV=1	ANGPTL3
Q9Y5Y6	0	0.058	0.047	0.114	0	0.091	0.036	0.132	1.028	0.032	0.443	0.189	0.653	0.77	1.939	0.856	0.089	2.28	1.306	7.828	0.561	0.422	0.411	0.102	0.003	0.003	0.125	0.056	0	0.159	5.91515	0.0745505	nosig	Suppressor of tumorigenicity 14 protein OS=Homo sapiens OX=9606 GN=ST14 PE=1 SV=2	ST14
Q9Y5Y7	0.6	0.628	0.581	0.519	0.718	0.69	0.454	0.717	0.333	0.537	1.095	0.717	1.002	0.568	1.147	1.143	1.167	3.137	0.546	3.414	1.511	1.466	0.801	0.858	0.819	0.803	0.811	0.678	1.395	0.645	2.05323	0.00244583	up	Lymphatic vessel endothelial hyaluronic acid receptor 1 OS=Homo sapiens OX=9606 GN=LYVE1 PE=1 SV=2	LYVE1
Q9Y608	0.467	0.603	0.322	0.366	1.1	0.516	0.452	0.8	0	0	1.657	1.454	2.81	0.855	0.623	1.694	1.17	0.194	2.07	1.36	2.691	1.245	1.527	1.475	0.66	0.745	1.33	1.42	1.626	0.967	2.98022	2.00E-05	up	Leucine-rich repeat flightless-interacting protein 2 OS=Homo sapiens OX=9606 GN=LRRFIP2 PE=1 SV=1	LRRFIP2
Q9Y624	0	0.774	0	0.871	0.639	0.658	0	0.937	0.891	0.58	0	0	0	1.047	3.349	0	0.643	1.059	1.097	1.484	0.791	1.071	0	0	0	0.411	0	0	0.927	0.761	1.18131	0.662074	nosig	Junctional adhesion molecule A OS=Homo sapiens OX=9606 GN=F11R PE=1 SV=1	F11R
Q9Y646	0.53	1.18	0.183	0.368	1.429	0.141	0.788	0.707	0.719	0.795	1.768	0.517	1.332	1.852	0.958	0.983	2.57	0.244	1.57	1.276	1.902	1.369	2.234	0.908	0.974	1.65	1.822	1.099	2.001	1.048	2.05241	0.000606058	up	Carboxypeptidase Q OS=Homo sapiens OX=9606 GN=CPQ PE=1 SV=1	CPQ
Q9Y6R7	0.464	0.702	0.292	0.582	0.692	0.514	0.483	0.785	0.668	0.845	0.696	1.511	1.94	0.991	0.841	1.925	0.951	1.826	1.265	2.733	0.931	1.516	0.943	1.029	0.835	1.167	1.085	1.382	0.871	0.977	2.10843	1.49E-05	up	IgGFc-binding protein OS=Homo sapiens OX=9606 GN=FCGBP PE=1 SV=3	FCGBP
Q9Y6Z7	0.549	0.713	0.699	0.36	0.869	0.615	0.876	0.717	0.706	0.715	1.086	0.748	0.71	1.141	1.879	0.794	1.235	0.993	0.947	3.808	0.696	0.845	1.017	1.236	0.994	0.976	0.862	0.808	1.728	1.128	1.73273	0.00522509	up	Collectin-10 OS=Homo sapiens OX=9606 GN=COLEC10 PE=1 SV=2	COLEC10
S6AU73	0.458	1.528	1.328	1.52	1.462	1.093	0.723	1.314	1.117	2.183	0.889	1.03	1.832	1.242	0.613	1.858	1.036	1.211	1.739	1.132	0.948	0.695	1.655	0.653	1.263	0.789	0.974	0.928	0.68	1.508	0.890893	0.437684	nosig	HLA class I histocompatibility antigen OS=Homo sapiens OX=9606 GN=HLA-B PE=1 SV=1	HLA-B
U3KQU7	0.026	1.841	1.67	1.923	1.893	0.333	1.413	1.852	2.454	0.619	0.049	1.411	2.382	0.063	1.843	1.992	2.335	3.511	0.845	0.392	0.641	0.478	0.657	0.496	0.306	0.044	0.639	0.276	0.379	1.996	0.739268	0.285778	nosig	Conserved oligomeric Golgi complex subunit 5 (Fragment) OS=Homo sapiens OX=9606 GN=COG5 PE=1 SV=1	COG5
V9GYM3	1.08	1.554	1.168	1.632	1.375	1.188	1.44	1.238	1.297	1.998	1.573	1.223	1.337	1.667	0.822	1.272	1.772	0.48	1.132	0.162	1.188	0.952	1.396	1.091	1.08	1.192	1.046	1.211	1.349	1.248	0.8301	0.0591689	nosig	Apolipoprotein A-II OS=Homo sapiens OX=9606 GN=APOA2 PE=1 SV=1	APOA2
V9HW50	0.668	0.901	0.604	0.855	1.57	0.662	0.68	0.882	0.666	0.959	0.621	2.382	0.902	10.448	0.878	0.982	1.583	0.549	0.733	0.606	0.635	0.571	0.777	0.702	0.775	0.69	0.882	0.658	0.983	0.803	1.60767	0.312665	nosig	All-trans-retinol dehydrogenase [NAD(+)] ADH1B OS=Homo sapiens OX=9606 GN=ADH1B PE=1 SV=1	ADH1B
X6RFL8	0.066	1.403	1.024	1.23	1.591	1.317	1.559	0.854	1.248	1.717	2.398	0.687	1.958	1.654	0.706	1.277	1.263	0	1.447	0.31	2.404	0.807	1.32	1.173	2.159	0.792	0.064	0.892	1.007	1.896	1.00816	0.964697	nosig	Ras-related protein Rab-14 (Fragment) OS=Homo sapiens OX=9606 GN=RAB14 PE=1 SV=1	RAB14
X6RLJ0	1.373	1.276	1.245	1.462	1.068	1.218	1.125	1.188	1.061	1.345	1.203	1.241	1.131	0.746	0.754	1.272	0.917	1.764	1.236	0.931	1.335	1.454	1.246	1.122	1.151	0.956	1.152	0.887	0.942	0.957	0.905954	0.102655	nosig	Complement C1q subcomponent subunit A (Fragment) OS=Homo sapiens OX=9606 GN=C1QA PE=1 SV=7	C1QA
